# Supplementary material for: A preliminary study of the effect of a high-salt diet on transcriptome dynamics in rat hypothalamic forebrain and brainstem cardiovascular control centers
Source: PeerJ. 2020 Mar 3;8:e8528. doi: 10.7717/peerj.8528 (PMC7059759; doi:10.7717/peerj.8528)
Supplement: Supplemental Information 1 [file peerj-08-8528-s007.xlsx]

## Sheet: Rpl19
	qPCR Data Analysis
Well	Sample Name	Cт	Cт Mean		Sample Name	Cт	Cт Mean		Sample Name	Cт	Cт Mean		Sample Name	Cт	Cт Mean
A1	AF1	21.9401	21.9452		BF3	21.9966	21.985		CF3	21.9159	21.8403		DF1	22.9119	22.9029
B1		21.9503				21.9734				21.7647				22.8939
A2	AF2	22.1895	22.1121		BF4	23.073	23.1428		CF4	23.0464	23.0116		DF3	22.535	22.5284
B2		22.0346				23.2125				22.9769				22.5218
A3	AP5	21.7804	21.75		BF5	22.9404	23.0027		CF5	22.1629	22.1445		DF5	22.357	22.3117
B3		21.7195				23.0651				22.1261				22.2663
A4	AF6	22.4608	22.4125		BF6	22.2088	22.199		CF6	22.577	22.4931		DF6	22.8845	22.8796
B4		22.3642				22.1892				22.4092				22.8747
A5	AF7	22.6736	22.6368		BF7	23.2155	23.1796		CF7	22.6022	22.477		DF7	22.8465	22.8364
B5		22.6				23.1436				22.3518				22.8264
A6	AF10	22.8872	22.8626		BF8	22.5027	22.4272		CF8	22.0217	21.9945		DF9	23.0693	23.0139
B6		22.838				22.3518				21.9674				22.9585
	AF12	22.9386	22.8716		BF10	22.7115	22.6702		CF10	22.6771	22.6559		DF10	22.6266	22.5981
		22.8046				22.6289				22.6347				22.5696
			22.3701				22.6581				22.3739				22.7244
		SD	0.446969				0.473084				0.406687				0.250675
		SEM	0.168939				0.178809				0.153713				0.0947463

## Sheet: Apopt1
	qPCR Data Analysis
Well	Sample Name	Cт	Cт Mean	Cт Mean_RPL19_2	ΔCт	Average	ΔΔCт	Power	Average
A8	AF1	27.4858	27.501	21.9452	5.55581	5.29343	0.262379	0.833712	1.03697
B8		27.5162
A9	AF2	27.3571	27.4058	22.1121	5.29374		0.000308832	0.999786
B9		27.4545
A10	AF5	27.2	27.1623	21.75	5.41233		0.118898	0.920891
B10		27.1246
	AF6	27.8602	27.8722	22.4125	5.45974		0.166309	0.891119
C9		27.8842
D9	AF7	28.1714	28.1751	22.6368	5.53836		0.244923	0.843861
C10		28.1788
	AF12	27.4338	27.3722	22.8716	4.50062		-0.792819	1.73246
		27.3106
D11
E7	BF3	27.3663	27.4535	21.985	5.4685		0.17507	0.885725	0.965211
F7		27.5407
E8	BF4	28.2611	28.3634	23.1428	5.22064		-0.0727941	1.05175
F8		28.4657
E10	BF5	28.1809	28.1853	23.0027	5.18259		-0.110848	1.07986
F10		28.1898
E11	BF6	27.8102	27.7711	22.199	5.57203		0.278592	0.824395
C2		27.7319
	BF7	28.5764	28.4987	23.1796	5.31915		0.0257185	0.982331
G7		28.421
H7	BF8	27.7917	27.7688	22.4272	5.34155		0.0481108	0.967202
G8		27.7458
D11
	CF3	27.2043	27.2372	21.8403	5.39696	5.47943	-0.0824688	1.05883	1.00084
		27.2702
	CF4	28.5591	28.5082	23.0116	5.49652		0.01709	0.988224
		28.4573
	CF5	27.6307	27.6766	22.1445	5.5321		0.0526725	0.964149
		27.7225
	CF6	27.956	27.9098	22.4931	5.41671		-0.0627182	1.04443
		27.8637
	CF7	27.9646	27.9475	22.477	5.47053		-0.00889953	1.00619
		27.9304
	CF8	27.4648	27.5583	21.9945	5.56375		0.084324	0.943226
		27.6517
	DF1	28.1048	28.1047	22.9029	5.20178		-0.277648	1.21222	1.15409
		28.1046
	DF5	27.5893	27.6153	22.3117	5.30362		-0.175806	1.1296
		27.6412
	DF6	28.1969	28.2337	22.8796	5.35414		-0.125286	1.09072
		28.2705
	DF7	28.3183	28.3033	22.8364	5.46691		-0.0125225	1.00872
		28.2884
	DF9	28.0324	28.0609	23.0139	5.047		-0.43243	1.3495
		28.0894
	DF10	27.9754	27.8963	22.5981	5.29825		-0.181178	1.13381
		27.8173

## Sheet: Lin52
	qPCR Data Analysis
Well	Sample Name	Cт	Cт Mean	Cт Mean_RPL19_2	ΔCт	Average	ΔΔCт	Power	Average
A9	AF2	33.2929	33.4331	22.1121	11.321	11.7046	-0.383533	1.30453	1.07574
B9		33.5733
A10	AF5	34.0816	34.0082	21.75	12.2582		0.553645	0.681297
B10		33.9347
	AF6	34.0006	33.9686	22.4125	11.5562		-0.148367	1.10831
C9		33.9367
D9	AF7	35.9735	34.9493	22.6368	12.3125		0.607975	0.656117
C10		33.9251
D10	AF10	33.5063	33.6548	22.8626	10.7922		-0.912314	1.88206
C11		33.8034
	AF12	35.0724	34.8588	22.8716	11.9871		0.282595	0.822111
		34.6451
D11
E8	BF4	34.1758	34.2905	23.1428	11.1477		-0.556832	1.47104	1.51047
F8		34.4051
E10	BF5	33.7048	33.8251	23.0027	10.8224		-0.882182	1.84316
F10		33.9454
E11	BF6	33.7963	33.6508	22.199	11.4517		-0.252804	1.19152
F11		33.5053
	BF7	34.5356	34.3263	23.1796	11.1467		-0.557832	1.47206
G7		34.117
H7	BF8	33.3038	33.3507	22.4272	10.9234		-0.781106	1.71845
G8		33.3975
	BF10	33.5456	33.9241	22.6702	11.254		-0.4506	1.36661
		34.3027
D11
	CF3	33.66	33.5821	21.8403	11.7418	11.7786	-0.0367579	1.02581	1.01489
		33.5042
	CF4	35.5906	34.6204	23.0116	11.6087		-0.169844	1.12494
		33.6502
	CF5	33.7258	34.169	22.1445	12.0245		0.245965	0.843252
		34.6123
	CF7	35.61	34.4604	22.477	11.9834		0.20487	0.867617
		33.3109
	CF8	34.0601	33.9628	21.9945	11.9683		0.18972	0.876776
		33.8656
	CF10	33.9318	34.0005	22.6559	11.3446		-0.433952	1.35093
		34.0693
	DF1	34.0717	34.4662	22.9029	11.5632		-0.215334	1.16097	1.54853
		34.8606
	DF3	32.8955	33.2425	22.5284	10.714		-1.06453	2.09149
		33.5894
	DF5	34.6544	34.0201	22.3117	11.7085		-0.0700879	1.04978
		33.3858
	DF6	33.8282	33.9622	22.8796	11.0826		-0.69593	1.61993
		34.0962
	DF7	33.3536	33.6435	22.8364	10.8071		-0.971454	1.96082
		33.9335
	DF9	34.6505	34.2986	23.0139	11.2847		-0.493859	1.40821
		33.9467

## Sheet: OXT
	qPCR Data Analysis
Well	Sample Name	Cт	Cт Mean	Cт Mean_RPL19_2	ΔCт	Average	ΔΔCт	Power	Average
A10	AF1	30.1063	30.0325	21.9452	8.08733	5.32363	2.7637	0.147246	3.20086
B10		29.9587
D9	AF2	34.5495	32.4936	22.1121	10.3815		5.0579	0.0300207
C10		30.4377
D10	AF5	25.2589	25.1222	21.75	3.37226		-1.95137	3.86741
C11		24.9856
	AF7	24.6028	24.6858	22.6368	2.04903		-3.2746	9.67728
		24.7688
	AF10	27.7161	27.5742	22.8626	4.71159		-0.612037	1.52842
		27.4323
	AF12	26.5275	26.2116	22.8716	3.34004		-1.98359	3.95475
		25.8958
	BF3	22.8846	22.9039	21.985	0.918917		-4.40471	21.1812	148.46
		22.9232
	BF4	21.5677	21.5561	23.1428	-1.58669		-6.91032	120.286
		21.5444
	BF5	18.525	18.5288	23.0027	-4.4739		-9.79753	889.919
		18.5326
	BF6	25.5762	25.4871	22.199	3.28809		-2.03554	4.09976
D11		25.398
E7	BF7	27.0998	27.1458	23.1796	3.96621		-1.35742	2.56226
F7		27.1917
E11	BF8	28.7289	29.2628	22.4272	6.83561		1.51198	0.35063
F11		29.7967
H7	BF10	28.0706	28.2745	22.6702	5.60433		0.280704	0.823189
G8		28.4785
	CF3	28.3685	27.9466	21.8403	6.10632	3.77501	6.10632	0.0145149	3.63968
		27.5247
	CF4	22.6323	22.5852	23.0116	-0.426471		-4.20148	18.3981
		22.5381
	CF5	27.8336	27.5148	22.1445	5.37033		1.59532	0.330949
		27.1961
	CF6	24.5701	24.616	22.4931	2.12286		-1.65216	3.14303
		24.6618
	CF7	26.4414	26.6451	22.477	4.16809		0.393081	0.761502
		26.8488
	CF8	24.3159	24.3356	21.9945	2.34107		-1.43394	2.70184
		24.3554
	CF10	29.3988	29.3988	22.6559	6.74289		2.96787	0.127815
		Undetermined
	DF1	23.2386	23.2423	22.9029	0.339377		-3.43564	10.8201	7.73264
		23.246
	DF3	24.5317	24.5909	22.5284	2.06246		2.06246	0.239408
		24.6501
	DF5	37.1852	34.0047	22.3117	11.693		7.91802	0.00413464
		30.8242
	DF6	23.1252	22.8316	22.8796	-0.0479975		-3.82301	14.1528
		22.5379
	DF7	24.7684	25.0473	22.8364	2.21089		-1.56413	2.95699
		25.3262
	DF9	22.5609	22.6108	23.0139	-0.40313		-4.17814	18.1028
		22.6607
	DF10	23.4706	23.4	22.5981	0.801899		-2.97311	7.8523
		23.3294

## Sheet: AVP
	qPCR Data Analysis
Well	Sample Name	Cт	Cт Mean	Cт Mean_RPL19_2	ΔCт	Average	ΔΔCт	Power	Average
A10	AF1	Undetermined	#DIV/0!	21.9452	#DIV/0!	9.01876	#DIV/0!		1.64203
B10		Undetermined
D9	AF2	Undetermined	#DIV/0!	22.1121	#DIV/0!		#DIV/0!
C10		Undetermined
D10	AF5	Undetermined	33.5713	21.75	11.8213		2.80255	0.143334
C11		33.5713
	AF7	30.8942	30.2252	22.6368	7.58846		-1.4303	2.69503
		29.5562
	AF10	30.8536	31.9985	22.8626	9.13591		0.117156	0.922004
		33.1435
	AF12	30.401	30.401	22.8716	7.52935		-1.48941	2.80773
		Undetermined
	BF3	29.6075	29.282	21.985	7.297		-1.72175	3.29837	4.32759
		28.9565
	BF4	28.5809	28.1831	23.1428	5.04039		-3.97837	15.7619
		27.7854
	BF6	33.9978	32.4249	22.199	10.2259		1.20711	0.433134
D11		30.852
E7	BF7	31.5915	34.3508	23.1796	11.1712		2.15245	0.22493
F7		37.11
E11	BF8	29.7028	30.5052	22.4272	8.07793		-0.940827	1.91963
F11		31.3076
H7	BF10	Undetermined	#DIV/0!	22.6702	#DIV/0!		#DIV/0!
G8		Undetermined
	CF3	Undetermined	#DIV/0!	21.8403	#DIV/0!	10.4355			3.93593
		Undetermined
	CF4	28.6824	29.1493	23.0116	6.13769		-4.2978	19.6682
		29.6163
	CF5	32.2724	32.5677	22.1445	10.4232		-0.0123277	1.00858
		32.863
	CF6	32.484	32.1225	22.4931	9.62937		-0.806119	1.7485
		31.761
	CF7	35.2927	35.2927	22.477	12.8157		2.38023	0.192079
		Undetermined
	CF8	31.5664	32.7274	21.9945	10.7329		0.297426	0.813703
		33.8885
	CF10	31.9101	35.53	22.6559	12.8741		2.43859	0.184464
		39.1498
	DF1	30.0648	29.8355	22.9029	6.93255		-3.50294	11.3368	8.3292
		29.6062
	DF3	28.9569	29.2747	22.5284	6.74627		6.74627	0.00931474
		29.5925
	DF6	29.1585	29.2493	22.8796	6.36974		-4.06575	16.746
		29.3401
	DF7	29.3574	30.103	22.8364	7.26661		-3.16888	8.99348
		30.8486
	DF9	30.4233	31.0814	23.0139	8.06745		-2.36803	5.16236
		31.7394
	DF10	30.7905	30.0836	22.5981	7.48554		-2.94995	7.72722
		29.3768
