# Supplementary material for: A preliminary study of the effect of a high-salt diet on transcriptome dynamics in rat hypothalamic forebrain and brainstem cardiovascular control centers
Source: PeerJ. 2020 Mar 3;8:e8528. doi: 10.7717/peerj.8528 (PMC7059759; doi:10.7717/peerj.8528)
Supplement: Supplemental Information 2 [file peerj-08-8528-s008.xlsx]

## Sheet: Rpl19
	qPCR Data Analysis
Well	Sample Name	Cт	Cт Mean		Sample Name	Cт	Cт Mean		Sample Name	Cт	Cт Mean		Sample Name	Cт	Cт Mean
A1	AS1	21.7555	21.7879		BS1	21.3541	21.3688		CS1	21.6751	21.6488		DS1	21.2842	21.29
		21.6781				21.3912				21.5431				21.3529
B1		21.9299				21.3611				21.7282				21.233
A2	AS2	22.0589	21.9948		BS2	22.0033	21.964		CS2	21.105	21.2174		DS2	21.1125	21.0979
		21.9422				21.9204				21.2862				21.101
B2		21.9832				21.9684				21.2611				21.0804
A3	AS3	21.6626	21.5593		BS3	21.2798	21.3108		CS3	20.9514	21.1618		DS3	21.296	21.272
		21.5851				21.4002				21.1612				21.2384
B3		21.4302				21.2524				21.3727				21.2816
A4	AS4	21.3037	21.2108		BS4	21.1303	21.1453		CS4	20.9396	21.1399		DS4	21.1034	21.1529
		21.2135				21.0933				21.4287				21.2086
B4		21.1154				21.2123				21.0516				21.1467
A5	AS5	21.3992	21.3449		BS5	21.214	21.2043		CS5	21.2097	21.317		DS5	21.3628	21.4276
		21.3599				21.2188				21.3582				21.3882
B5		21.2756				21.1802				21.383				21.5317
A6	AS6	21.2666	21.2518		BS6	21.0459	21.0711		CS6	21.2456	21.198		DS6	23.9676	23.8337
		21.2366				21.0914				21.1619				23.8839
B6		21.2523				21.0761				21.1865				23.6496
		Average	21.5249				21.3441				21.2805				21.679
		SD	0.315184				0.322377				0.190589				1.06183
		SEM	0.128673				0.13161				0.0778075				0.43349

## Sheet: AVP
	qPCR Data Analysis
Well	Sample Name	Cт	Cт Mean	Cт Mean_RPL19_2	ΔCт	Average	ΔΔCт	Power	Average
A8	AS1	27.1355	27.0021	21.7879	5.21424	4.73002	0.484221	0.714883	1.23021
B8		26.8687
A9	AS2	25.9701	25.8942	21.9948	3.8994		-0.83062	1.77845
B9		25.8182
A10	AS3	25.8355	25.4897	21.5593	3.93045		-0.799573	1.74059
B10		25.1439
	AS4	24.9777	24.9624	21.2108	3.75159		-0.978424	1.97031
C9		24.9472
D9	AS5	28.169	28.0955	21.3449	6.75062		2.0206	0.246455
C10		28.022
D10	AS6	26.0504	26.0856	21.2518	4.83381		0.103793	0.930583
C11		26.1209
D11
E7	BS1	25.6382	25.6919	21.3688	4.32312		-0.406895	1.32583	1.70768
F7		25.7456
E8	BS2	24.7035	24.797	21.964	2.83291		-1.89711	3.72466
F8		24.8904
E10	BS3	26.5862	26.6747	21.3108	5.36392		0.6339	0.644432
F10		26.7632
E11	BS4	25.4781	25.4566	21.1453	4.31136		-0.418662	1.33669
F11		25.4352
	BS5	24.7476	24.8359	21.2043	3.63164		-1.09838	2.14114
G7		24.9243
H7	BS6	25.5866	25.6991	21.0711	4.62794		-0.102073	1.07331
G8		25.8115
D11
	CS1	24.3426	24.2173	21.6488	2.56847	4.15243	-1.58397	2.99793	1.30508
		24.0919
	CS2	27.6104	27.638	21.2174	6.42062		2.26819	0.207591
		27.6657
	CS3	24.9311	24.9347	21.1618	3.77298		-0.379457	1.30085
		24.9383
	CS4	24.7319	24.8095	21.1399	3.66957		-0.482863	1.39751
		24.8872
	CS5	25.8085	25.8781	21.317	4.56109		0.408659	0.753323
		25.9476
	CS6	25.079	25.1199	21.198	3.92187		-0.23056	1.17329
		25.1607
	DS1	23.3603	23.3168	21.29	2.02682		-2.12561	4.36388	3.66109
		23.2734
	DS2	23.5904	23.5336	21.0979	2.43565		-1.71678	3.28702
		23.4768
	DS3	25.0299	25.0062	21.272	3.73418		-0.418258	1.33631
		24.9825
	DS4	23.794	23.7824	21.1529	2.62952		-1.52291	2.87371
		23.7708
	DS5	25.065	25.0016	21.4276	3.57407		-0.578367	1.49316
		24.9383
	DS6	24.9298	24.8797	23.8337	1.046		-3.10643	8.61249
		24.8297

## Sheet: Caprin2
	qPCR Data Analysis
Well	Sample Name	Cт	Cт Mean	Cт Mean_RPL19_2	ΔCт	Average	ΔΔCт	Power	Average
A8	AS1	25.8047	25.8077	21.7879	4.0198	4.2056	-0.185806	1.13745	1.08671
B8		25.8106
A9	AS2	26.1787	26.1699	21.9948	4.1752		-0.0304036	1.0213
B9		26.1612
A10	AS3	25.5326	25.554	21.5593	3.99469		-0.21091	1.15742
B10		25.5753
	AS4	24.8355	24.8094	21.2108	3.59856		-0.607041	1.52313
C9		24.7833
D9	AS5	26.9266	26.9714	21.3449	5.62657		1.42097	0.373462
C10		27.0163
D10	AS6	25.166	25.0706	21.2518	3.81879		-0.386808	1.3075
C11		24.9753
D11
E7	BS1	25.1217	25.0422	21.3688	3.67346		-0.532143	1.44608	2.19217
F7		24.9628
E8	BS2	25.2936	25.2403	21.964	3.27629		-0.929307	1.90436
F8		25.1871
E10	BS3	23.5844	23.6589	21.3108	2.34814		-1.85746	3.62369
F10		23.7335
E11	BS4	23.9737	24.0352	21.1453	2.88992		-1.31568	2.4892
F11		24.0967
	BS5	24.7078	24.7292	21.2043	3.52495		-0.680655	1.60287
G7		24.7507
H7	BS6	24.1614	24.2154	21.0711	3.14429		-1.06131	2.08683
G8		24.2694
D11
	CS1	24.6841	24.8068	21.6488	3.15796	3.65016	-0.492195	1.40658	1.07838
		24.9295
	CS2	25.4454	25.6164	21.2174	4.39903		0.748868	0.59507
		25.7874
	CS3	24.4004	24.4758	21.1618	3.31408		-0.336077	1.26232
		24.5513
	CS4	24.7693	24.8756	21.1399	3.73567		0.0855141	0.942449
		24.982
	CS5	25.6704	25.6906	21.317	4.37368		0.723517	0.605619
		25.7109
	CS6	24.1015	24.1185	21.198	2.92053		-0.729627	1.65821
		24.1356
	DS1	23.9158	23.983	21.29	2.69298		-0.957184	1.94152	2.98668
		24.0502
	DS2	24.0551	24.1084	21.0979	3.01043		-0.639733	1.55804
		24.1616
	DS3	23.9832	23.9644	21.272	2.69242		-0.95774	1.94227
		23.9456
	DS4	23.6121	23.6517	21.1529	2.49882		-1.15134	2.22119
		23.6913
	DS5	24.0958	24.073	21.4276	2.64545		-1.00471	2.00654
		24.0503
	DS6	24.3035	24.4394	23.8337	0.605676		-3.04448	8.25051
		24.5753

## Sheet: OT
	qPCR Data Analysis
Well	Sample Name	Cт	Cт Mean	Cт Mean_RPL19_2	ΔCт	Average	ΔΔCт	Power	Average
A8	AS1	19.2767	19.2724	21.7879	-2.51544	-2.27491	-0.240528	1.18143	1.10669
B8		19.2681
A9	AS2	20.0484	20.0506	21.9948	-1.94419		0.33072	0.79514
B9		20.0528
A10	AS3	18.7762	18.7947	21.5593	-2.76457		-0.489657	1.40411
B10		18.8133
	AS4	18.3502	18.3512	21.2108	-2.8596		-0.584689	1.49972
C9		18.3523
D9	AS5	20.4912	20.5377	21.3449	-0.807207		1.46771	0.361557
C10		20.5842
D10	AS6	18.4652	18.4934	21.2518	-2.75846		-0.483551	1.39818
C11		18.5216
D11
E7	BS1	19.2724	19.2988	21.3688	-2.07001		0.204905	0.867596	1.48547
F7		19.3251
E8	BS2	18.9207	18.9393	21.964	-3.02476		-0.749845	1.68161
F8		18.9579
E10	BS3	18.5743	18.5859	21.3108	-2.72495		-0.450039	1.36608
F10		18.5974
E11	BS4	17.9722	17.9357	21.1453	-3.20955		-0.934641	1.91141
F11		17.8992
	BS5	17.9548	17.9456	21.2043	-3.25869		-0.983779	1.97764
G7		17.9364
H7	BS6	18.7424	18.6476	21.0711	-2.42353		-0.148618	1.10851
G8		18.5528
D11
	CS1	18.7146	18.6644	21.6488	-2.98443	-2.24875	-0.735683	1.66519	1.08359
		18.6141
	CS2	20.1362	20.1593	21.2174	-1.05807		1.19068	0.438095
		20.1825
	CS3	18.8343	18.7527	21.1618	-2.40907		-0.160324	1.11754
		18.671
	CS4	18.9504	18.9541	21.1399	-2.18581		0.0629371	0.957313
		18.9578
	CS5	19.213	19.2195	21.317	-2.09749		0.151261	0.900463
		19.2259
	CS6	18.3845	18.4404	21.198	-2.75762		-0.508873	1.42294
		18.4963
	DS1	17.8939	17.9091	21.29	-3.38094		-1.1322	2.19192	3.69075
		17.9242
	DS2	17.7996	17.8112	21.0979	-3.28678		-1.03803	2.05342
		17.8227
	DS3	18.2891	18.3117	21.272	-2.96026		-0.71151	1.63752
		18.3343
	DS4	17.8396	17.8718	21.1529	-3.28107		-1.03233	2.04532
		17.904
	DS5	18.2548	18.2747	21.4276	-3.15284		-0.904092	1.87137
		18.2947
	DS6	17.9385	17.9591	23.8337	-5.8746		-3.62585	12.345
		17.9798

## Sheet: Sctr
	qPCR Data Analysis
Well	Sample Name	Cт	Cт Mean	Cт Mean_RPL19_2	ΔCт	Average	ΔΔCт	Power	Average
A8	AS1	32.093	32.1458	21.7879	10.3579	10.6001	-0.242135	1.18274	1.0536
B8		32.1986
A9	AS2	33.0383	32.9852	21.9948	10.9905		0.390395	0.762921
B9		32.9322
A10	AS3	31.7922	31.7717	21.5593	10.2124		-0.387695	1.3083
B10		31.7512
	AS4	31.4045	31.2938	21.2108	10.083		-0.517073	1.43105
C9		31.1832
D9	AS5	32.6313	32.835	21.3449	11.4901		0.890062	0.539591
C10		33.0387
D10	AS6	31.7463	31.7183	21.2518	10.4665		-0.133554	1.09699
C11		31.6904
D11
E7	BS1	31.546	31.4679	21.3688	10.0991		-0.500982	1.41518	1.73361
F7		31.3898
E8	BS2	31.7589	31.7666	21.964	9.80253		-0.797548	1.73814
F8		31.7742
E10	BS3	30.4729	30.5606	21.3108	9.24976		-1.35032	2.54968
F10		30.6482
E11	BS4	30.9391	30.9317	21.1453	9.78641		-0.813665	1.75767
F11		30.9243
	BS5	31.056	31.0589	21.2043	9.85457		-0.745505	1.67656
G7		31.0617
H7	BS6	31.4341	31.3327	21.0711	10.2616		-0.338511	1.26445
G8		31.2313
D11
	CS1	31.124	31.3885	21.6488	9.73966	10.6491	-0.909442	1.87832	1.23888
		31.6529
	CS2	32.1009	32.2722	21.2174	11.0548		0.405677	0.754882
		32.4434
	CS3	31.748	31.5112	21.1618	10.3495		-0.299617	1.23082
		31.2745
	CS4	31.4714	31.4001	21.1399	10.2602		-0.388949	1.30944
		31.3288
	CS5	34.0255	34.1912	21.317	12.8742		2.22509	0.213886
		34.3568
	CS6	30.86	30.8144	21.198	9.61635		-1.03275	2.04593
		30.7687
	DS1	30.7823	30.8696	21.29	9.57953		-1.06957	2.09881	3.66015
		30.9568
	DS2	30.6678	30.7093	21.0979	9.61134		-1.03776	2.05304
		30.7508
	DS3	30.6647	30.7149	21.272	9.44285		-1.20625	2.30737
		30.7651
	DS4	30.5056	30.5873	21.1529	9.43439		-1.21472	2.32095
		30.6689
	DS5	30.8	30.8859	21.4276	9.45838		-1.19072	2.28266
		30.9719
	DS6	31.1143	31.0368	23.8337	7.2031		-3.446	10.8981
		30.9594

## Sheet: Ndufaf2
	qPCR Data Analysis
Well	Sample Name	Cт	Cт Mean	Cт Mean_RPL19_2	ΔCт	Average	ΔΔCт	Power	Average
A8	AS1	27.3808	27.3214	21.7879	5.53355	5.90945	-0.375904	1.29765	1.00927
B8		27.2621
A9	AS2	27.9283	27.8582	21.9948	5.86347		-0.0459841	1.03239
B9		27.7881
A10	AS3	27.4488	27.5597	21.5593	6.00038		0.0909273	0.938919
B10		27.6705
	AS4	27.5071	27.3222	21.2108	6.11135		0.201899	0.869406
C9		27.1373
D9	AS5	27.2992	27.2172	21.3449	5.87236		-0.0370952	1.02605
C10		27.1353
D10	AS6	27.2319	27.3274	21.2518	6.07561		0.166157	0.891214
C11		27.423
D11
E7	BS1	27.2401	27.1059	21.3688	5.73706		-0.172391	1.12692	1.041
F7		27.1059
E8	BS2	27.5235	27.6077	21.964	5.64366		-0.26579	1.20229
F8		27.6919
E10	BS3	27.3894	27.5016	21.3108	6.1908		0.28135	0.822821
F10		27.6138
E11	BS4	26.7984	26.8281	21.1453	5.68281		-0.226645	1.17011
F11		26.8578
	BS5	27.229	27.2386	21.2043	6.03434		0.124889	0.917075
G7		27.2482
H7	BS6	26.959	26.9708	21.0711	5.89968		-0.0097794	1.0068
G8		26.9826
D11
	CS1	27.3623	27.2432	21.6488	5.59441	4.63933	0.955078	0.515814	4.59177
		27.1241
	CS2	26.7418	26.7752	21.2174	5.55781		0.918479	0.529066
		26.8086
	CS3	26.7141	26.6806	21.1618	5.51884		0.879514	0.54355
		26.6471
	CS4	26.7751	26.685	21.1399	5.54509		0.905767	0.533749
		26.5949
	CS5	26.9705	26.9671	21.317	3.82782e-07		-4.63933	24.9216
		26.9636
	CS6	26.8495	26.8178	21.198	5.61982		0.980489	0.506808
		26.7862
	DS1	26.9443	26.9078	21.29	5.61781		0.978484	0.507513	0.946122
		26.8714
	DS2	26.9569	26.8969	21.0979	5.79899		1.15966	0.447617
		26.837
	DS3	26.9808	26.9608	21.272	5.68884		1.04951	0.483131
		26.9409
	DS4	27.0586	27.0306	21.1529	5.87768		1.23836	0.423856
		27.0026
	DS5	27.0453	27.0011	21.4276	5.57351		0.934187	0.523337
		26.9569
	DS6	26.8795	26.7544	23.8337	2.92068		-1.71865	3.29128
		26.6293

## Sheet: Kcnv1
	qPCR Data Analysis
Well	Sample Name	Cт	Cт Mean	Cт Mean_RPL19_2	ΔCт	Average	ΔΔCт	Power	Average
A8	AS1	28.8158	28.8879	21.7879	7.10001	7.26436	-0.164354	1.12066	1.05511
B8		28.9599
A9	AS2	28.4861	28.5076	21.9948	6.5129		-0.751465	1.6835
B9		28.5292
A10	AS3	29.5967	29.6359	21.5593	8.07659		0.812233	0.5695
B10		29.6751
	AS4	28.5354	28.543	21.2108	7.33215		0.0677888	0.954099
C9		28.5506
D9	AS5	28.4007	28.3865	21.3449	7.04167		-0.222686	1.1669
C10		28.3724
D10	AS6	28.7577	28.7747	21.2518	7.52284		0.258484	0.835966
C11		28.7916
D11
E7	BS1	28.6712	28.7724	21.3688	7.40363		0.13927	0.907978	0.572624
F7		28.8736
E8	BS2	29.0231	28.9378	21.964	6.97374		-0.290624	1.22317
F8		28.8525
E10	BS3	29.9817	29.8194	21.3108	8.50863		1.24427	0.422122
F10		29.6571
E11	BS4	30.0832	29.9834	21.1453	8.83813		1.57376	0.335931
F11		29.8836
	BS5	30.4242	30.1808	21.2043	8.97649		1.71213	0.305209
G7		29.9374
H7	BS6	30.2095	30.3864	21.0711	9.31525		2.05089	0.241336
G8		30.5632
D11
	CS1	29.8531	29.9261	21.6488	8.27729	8.03869	0.238597	0.847569	1.1459
		29.9991
	CS2	27.9302	27.9301	21.2174	6.71273		-1.32596	2.507
		27.93
	CS3	28.9825	29.0524	21.1618	7.89061		-0.148083	1.1081
		29.1223
	CS4	29.042	29.045	21.1399	7.90505		-0.133646	1.09706
		29.048
	CS5	30.5551	30.5262	21.317	9.20927		1.17058	0.444243
		30.4974
	CS6	29.5034	29.4352	21.198	8.23721		0.198513	0.871448
		29.367
	DS1	29.696	29.626	21.29	8.33594		0.297242	0.813807	1.24314
		29.5559
	DS2	29.5569	29.6781	21.0979	8.58018		0.541481	0.687065
		29.7993
	DS3	30.0375	30.0464	21.272	8.77442		0.735721	0.600518
		30.0554
	DS4	30.5427	30.4784	21.1529	9.32553		1.28684	0.409848
		30.4142
	DS5	30.2931	30.1415	21.4276	8.71391		0.675217	0.626238
		29.9899
	DS6	29.6006	29.7609	23.8337	5.92721		-2.11148	4.32135
		29.9213
