# Supplementary material for: A preliminary study of the effect of a high-salt diet on transcriptome dynamics in rat hypothalamic forebrain and brainstem cardiovascular control centers
Source: PeerJ. 2020 Mar 3;8:e8528. doi: 10.7717/peerj.8528 (PMC7059759; doi:10.7717/peerj.8528)
Supplement: Supplemental Information 4 [file peerj-08-8528-s010.xlsx]

## Sheet: Rpl19
	qPCR Data Analysis
Well	Sample Name	Cт	Cт Mean											Cт Mean	Cт SD	ΔCт	ΔCт Mean	ΔCт SE	HK Control ΔCт Mean	HK Control ΔCт SE	ΔΔCт	Automatic Ct Threshold	Ct Threshold	Automatic Baseline	Baseline Start	Baseline End	Efficiency	Tm1	Tm2	Tm3	Comments	BADROX	HIGHSD	NOISE	SPIKE
A1	AN1	15.648	15.4813											18.5276	0.504288							TRUE	6.7359	TRUE	1	2	1	84.3641				Y	Y	N	N
B1		15.4935												18.5276	0.504288							TRUE	6.7359	TRUE	3	10	1	83.9162				Y	Y	N	N
		15.3023
A2	AN2	15.4314	15.0425											18.0612	0.274743							TRUE	6.7359	TRUE	1	2	1	84.0655				Y	N	N	N
B2		14.8627												18.0612	0.274743							TRUE	6.7359	TRUE	3	8	1	83.7669				Y	N	N	N
		14.8335
A3	AN3	14.8962	14.842											18.7741	0.180634							TRUE	6.7359	TRUE	1	2	1	84.0704				Y	N	N	N
B3		14.7992												18.7741	0.180634							TRUE	6.7359	TRUE	1	2	1	83.9211				Y	N	N	N
		14.8305
A4	AN4	15.0501	15.076											18.2791	0.248421							TRUE	6.7359	TRUE	1	2	1	83.9211				Y	N	N	Y
B4		14.8948												18.2791	0.248421							TRUE	6.7359	TRUE	3	5	1	83.7718				Y	N	N	N
		15.2831
A5	AN6	15.297	15.2098											18.7809	0.00202844							TRUE	6.7359	TRUE	3	10	1	83.7721				Y	N	N	N
B5		14.9951												18.7809	0.00202844							TRUE	6.7359	TRUE	3	9	1	83.6227				Y	N	N	N
		15.3372
A6	AN7	16.0706	15.8192											18.7741	0.112905							TRUE	6.7359	TRUE	3	7	1	83.7721				Y	N	N	N
B6		15.8739												18.7741	0.112905							TRUE	6.7359	TRUE	3	9	1	83.6227				Y	N	N	N
		15.513
	AN5	21.9116	21.8894
		21.909
		21.8478
C1	BN1	16.557	16.1397											17.2788	0.661347							TRUE	6.7359	TRUE	1	2	1	84.0655				Y	Y	N	N
D1		15.9457												17.2788	0.661347							TRUE	6.7359	TRUE	1	2	1	84.5134				Y	Y	N	N
		15.9165
C2	BN2	14.8425	14.6312											17.9042	0.139075							TRUE	6.7359	TRUE	3	8	1	83.9162				Y	N	N	N
D2		14.6681												17.9042	0.139075							TRUE	6.7359	TRUE	3	8	1	83.7669				Y	N	N	N
		14.3832
C3	BN3	14.8299	14.8154											18.2335	0.0303349							TRUE	6.7359	TRUE	3	8	1	83.7718				Y	N	N	N
D3		14.8924												18.2335	0.0303349							TRUE	6.7359	TRUE	1	2	1	83.6224				Y	N	N	N
		14.7238
C4	BN5	14.7934	14.9754											18.4008	0.0608128							TRUE	6.7359	TRUE	1	2	1	83.6224				Y	N	N	N
D4		14.929												18.4008	0.0608128							TRUE	6.7359	TRUE	3	10	1	83.7718				Y	N	N	N
		15.2037
C5	BN7	15.5503	15.3527											18.3152	0.0158594							TRUE	6.7359	TRUE	3	5	1	83.4734				Y	N	N	N
D5		15.2693												18.3152	0.0158594							TRUE	6.7359	TRUE	3	10	1	83.4734				Y	N	N	N
		15.2384
C6	BN9	15.2514	15.3218											18.6122	0.0656965							TRUE	6.7359	TRUE	3	8	1	83.6227				Y	N	N	N
D6		15.4334												18.6122	0.0656965							TRUE	6.7359	TRUE	3	6	1	83.4734				Y	N	N	N
		15.2804
	BN4	22.0297	21.9837
		21.9577
		21.9637
	BN6	21.6283	21.5691
		21.5345
		21.5444
E1	CN2	14.8381	14.8322											18.7508	0.0420295							TRUE	6.7359	TRUE	3	7	1	83.6176				Y	N	N	N
F1		14.6796												18.7508	0.0420295							TRUE	6.7359	TRUE	1	2	1	83.9162				Y	N	N	N
		14.9788
E2	CN3	14.9024	14.8534											18.2552	0.0598162							TRUE	6.7359	TRUE	3	10	1	83.7669				Y	N	N	N
F2		14.9511												18.2552	0.0598162							TRUE	6.7359	TRUE	1	2	1	83.7669				Y	N	N	N
		14.7066
E3	CN6	15.3396	15.4398											18.3331	0.0915254							TRUE	6.7359	TRUE	1	2	1	83.7718				Y	N	N	N
F3		15.3843												18.3331	0.0915254							TRUE	6.7359	TRUE	1	2	1	83.6224				Y	N	N	N
		15.5956
E4	CN7	15.7646	15.8975											18.5082	0.161899							TRUE	6.7359	TRUE	3	9	1	83.7718				Y	N	N	Y
F4		15.505												18.5082	0.161899							TRUE	6.7359	TRUE	3	8	1	83.6224				Y	N	N	N
		16.423
E5	CN8	15.6796	15.6905											18.7162	0.160435							TRUE	6.7359	TRUE	3	8	1	83.4734				Y	N	N	N
F5		15.5724												18.7162	0.160435							TRUE	6.7359	TRUE	3	8	1	83.4734				Y	N	N	N
		15.8194
E6	CN9	14.9772	15.2004											18.4091	0.155026							TRUE	6.7359	TRUE	3	10	1	83.4734				Y	N	N	N
F6		15.3306												18.4091	0.155026							TRUE	6.7359	TRUE	3	8	1	83.4734				Y	N	N	N
		15.2934
	CN1	21.7352	21.7777
		21.9109
		21.687
	CN5	21.971	21.9529
		21.9788
		21.9087
G1	DN1	15.2466	15.3872											18.9259	1.40553							TRUE	6.7359	TRUE	3	11	1	83.9162				N	Y	N	N
H1		15.327												18.9259	1.40553							TRUE	6.7359	TRUE	1	2	1	84.0655				Y	Y	N	N
		15.5881
G2	DN2	14.8756	15.106											18.8554	0.296131							TRUE	6.7359	TRUE	3	8	1	83.7669				Y	N	N	N
H2		15.1857												18.8554	0.296131							TRUE	6.7359	TRUE	3	10	1	83.7669				Y	N	N	N
		15.2566
G3	DN3	15.3843	15.2012											18.1565	0.0566197							TRUE	6.7359	TRUE	1	2	1	83.7718				Y	N	N	N
H3		14.9084												18.1565	0.0566197							TRUE	6.7359	TRUE	1	2	1	83.9211				Y	N	N	N
		15.311
G4	DN4	14.3276	14.7792											18.577	0.0959869							TRUE	6.7359	TRUE	3	7	1	83.7718				Y	N	N	N
H4		14.6565												18.577	0.0959869							TRUE	6.7359	TRUE	3	7	1	83.7718				Y	N	N	N
		15.3533
G5	DN5	14.3488	14.7311											19.0057	0.14333							TRUE	6.7359	TRUE	3	8	1	83.6227				Y	N	N	N
H5		14.5272												19.0057	0.14333							TRUE	6.7359	TRUE	3	9	1	83.6227				Y	N	N	N
		15.3173
G6	DN8	15.5251	15.7467											19.0213	0.278374							TRUE	6.7359	TRUE	3	9	1	83.6227				Y	N	N	N
H6		15.3536												19.0213	0.278374							TRUE	6.7359	TRUE	3	10	1	83.4734				Y	N	N	N
		16.3614
	DN6	20.9321	20.9727
		21.0066
		20.9793
	DN9	21.9597	21.9443
		21.9527
		21.9204
	DN7	23.3114	23.2663
		23.2798
		23.2078

## Sheet: Rprd1a
	qPCR Data Analysis
Well	Sample Name	Cт	Cт Mean	Cт Mean_RPL19_2	ΔCт	Average	ΔΔCт	Power	Average
A7	AN1	27.3359	27.4038	15.4813	11.9226	11.704	0.218626	0.859383	1.02017
B7		27.4718
A8	AN2	26.5865	26.5365	15.0425	11.494		-0.209993	1.15668
B8		26.4865
A9	AN3	26.9318	26.9118	14.842	12.0698		0.365882	0.775994
B9		26.8918
A10	AN4	27.0689	26.9926	15.076	11.9166		0.212655	0.862948
B10		26.9164
A11	AN6	26.7125	26.7778	15.2098	11.5681		-0.135897	1.09878
B11		26.8432
A12	AN7	27.2132	27.0719	15.8192	11.2527		-0.451273	1.36725
B12		26.9305
C7	BN1	27.7813	27.7369	16.1397	11.5972		-0.10675	1.0768	1.0214
D7		27.6926
C8	BN2	26.5362	26.663	14.6312	12.0317		0.327771	0.796767
D8		26.7898
C9	BN3	26.5431	26.5481	14.8154	11.7327		0.0287671	0.980258
D9		26.5531
C10	BN5	26.5008	26.5314	14.9754	11.556		-0.147974	1.10801
D10		26.562
C11	BN7	26.6818	26.6306	15.3527	11.2779		-0.42602	1.34352
D11		26.5794
C12	BN9	27.2068	27.3067	15.3218	11.9849		0.280958	0.823044
D12		27.4065
E7	CN2	26.4075	26.3511	14.8322	11.5189	11.5513	-0.0324197	1.02273	1.04261
F7		26.2947
E8	CN3	27.1267	27.1153	14.8534	12.2619		0.710569	0.611079
F8		27.1039
E9	CN6	26.8073	26.8003	15.4398	11.3604		-0.190894	1.14147
F9		26.7932
E10	CN7	26.7787	26.858	15.8975	10.9604		-0.590891	1.50618
F10		26.9373
E11	CN8	27.5771	27.6038	15.6905	11.9133		0.361983	0.778094
F11		27.6305
E12	CN9	26.4587	26.4934	15.2004	11.293		-0.258347	1.19611
F12		26.5281
G7	DN1	28.246	28.2187	15.3872	12.8315		1.28013	0.411759	0.574851
H7		28.1914
G8	DN2	27.3882	27.3703	15.106	12.2643		0.712971	0.610063
H8		27.3524
G9	DN3	26.9974	27.0405	15.2012	11.8393		0.287927	0.819078
H9		27.0836
G10	DN4	28.1025	28.0918	14.7792	13.3126		1.76127	0.294988
H10		28.081
G11	DN7	28.4156	28.5469	14.7311	13.8158		2.26446	0.208128
H11		28.6782
G12	DN9	27.1446	27.1539	15.7467	11.4072		-0.144162	1.10509
H12		27.1631

## Sheet: Csrnp3
	qPCR Data Analysis
Well	Sample Name	Cт	Cт Mean	Cт Mean_RPL19_2	ΔCт	Average	ΔΔCт	Power	Average
A7	AN1	27.6609	27.6846	15.4813	12.2034	12.1915	0.0119027	0.991784	1.02169
B7		27.7084
A8	AN2	27.5408	27.3785	15.0425	12.336		0.144534	0.904672
B8		27.2163
A9	AN3	27.472	27.4107	14.842	12.5687		0.377222	0.769919
B9		27.3493
A10	AN4	27.506	27.4692	15.076	12.3932		0.201685	0.869535
B10		27.4324
A11	AN6	27.1838	27.1823	15.2098	11.9725		-0.218989	1.16392
B11		27.1807
A12	AN7	27.4826	27.4943	15.8192	11.6751		-0.516354	1.43034
B12		27.506
C7	BN1	28.3487	28.3858	16.1397	12.2461		0.0545948	0.962865	0.99795
D7		28.4229
C8	BN2	27.2013	27.0962	14.6312	12.465		0.273518	0.8273
D8		26.9911
C9	BN3	27.1197	27.0457	14.8154	12.2304		0.0389043	0.973394
D9		26.9718
C10	BN5	26.9574	26.9741	14.9754	11.9987		-0.192744	1.14294
D10		26.9908
C11	BN7	27.1025	27.1357	15.3527	11.783		-0.408422	1.32723
D11		27.1689
C12	BN9	27.9034	27.9206	15.3218	12.5989		0.407417	0.753972
D12		27.9379
E7	CN2	26.7271	26.7652	14.8322	11.933	12.0188	-0.085769	1.06125	1.07019
F7		26.8033
E8	CN3	27.9234	27.7697	14.8534	12.9163		0.897569	0.53679
F8		27.616
E9	CN6	27.2116	27.2467	15.4398	11.8069		-0.211894	1.15821
F9		27.2818
E10	CN7	27.0828	27.0966	15.8975	11.199		-0.81974	1.76509
F10		27.1104
E11	CN8	28.1928	28.1417	15.6905	12.4512		0.432441	0.741007
F11		28.0906
E12	CN9	27.0273	27.0066	15.2004	11.8062		-0.212607	1.15878
F12		26.9859
G7	DN1	28.7574	28.8178	15.3872	13.4306		1.41182	0.375837	0.534148
H7		28.8782
G8	DN2	27.6831	27.7329	15.106	12.6269		0.608125	0.656049
H8		27.7826
G9	DN3	27.7294	27.6563	15.2012	12.4551		0.436322	0.739016
H9		27.5833
G10	DN4	28.9708	29.0133	14.7792	14.2342		2.21538	0.215329
H10		29.0558
G11	DN7	29.1523	29.0436	14.7311	14.3125		2.29377	0.203942
H11		28.935
G12	DN9	27.6941	27.7444	15.7467	11.9977		-0.0210708	1.01471
H12		27.7947

## Sheet: Snrpd21
	qPCR Data Analysis
Well	Sample Name	Cт	Cт Mean	Cт Mean_RPL19_2	ΔCт	Average	ΔΔCт	Power	Average
A7	AN1	24.9217	24.806	15.4813	9.32477	9.58623	-0.261463	1.19869	1.07569
B7		24.6903
A8	AN2	24.4637	24.4516	15.0425	9.40908		-0.177153	1.13065
B8		24.4395
A9	AN3	25.0819	25.0305	14.842	10.1885		0.602281	0.658712
B9		24.979
A10	AN4	25.0943	25.5691	15.076	10.4931		0.906896	0.533331
B10		26.0439
A11	AN6	24.5078	24.4826	15.2098	9.27279		-0.313443	1.24267
B11		24.4573
A12	AN7	24.616	24.6483	15.8192	8.82911		-0.757118	1.69011
B12		24.6806
C7	BN1	25.29	25.227	16.1397	9.08728		-0.498946	1.41318	1.03397
D7		25.1641
C8	BN2	24.3796	24.3979	14.6312	9.76667		0.180442	0.882433
D8		24.4162
C9	BN3	24.8042	24.7772	14.8154	9.96186		0.375634	0.770767
D9		24.7502
C10	BN5	24.6745	24.4894	14.9754	9.51397		-0.0722556	1.05136
D10		24.3042
C11	BN7	24.7887	24.7863	15.3527	9.4336		-0.152634	1.1116
D11		24.7839
C12	BN9	24.9702	24.9453	15.3218	9.62351		0.0372761	0.974493
D12		24.9203
E7	CN2	24.4829	24.4885	14.8322	9.65638	9.52601	0.130372	0.913596	1.01654
F7		24.4942
E8	CN3	24.918	24.8706	14.8534	10.0173		0.491262	0.711403
F8		24.8232
E9	CN6	24.9504	24.8997	15.4398	9.45983		-0.0661778	1.04694
F9		24.8489
E10	CN7	25.0155	25.0461	15.8975	9.14852		-0.377481	1.29907
F10		25.0766
E11	CN8	25.0574	25.0835	15.6905	9.39302		-0.132983	1.09656
F11		25.1096
E12	CN9	24.6466	24.6814	15.2004	9.48101		-0.044992	1.03168
F12		24.7163
G7	DN1	26.053	25.9638	15.3872	10.5766		1.05057	0.482776	0.543889
H7		25.8746
G8	DN2	25.1026	31.0376	15.106	15.9317		6.40566	0.0117952
H8		36.9727
G9	DN3	26.6668	25.8717	15.2012	10.6705		1.14449	0.45235
H9		25.0767
G10	DN4	26.1646	26.0558	14.7792	11.2766		1.75061	0.297176
H10		25.9469
G11	DN7	24.1954	24.1575	14.7311	9.42638		-0.0996289	1.0715
H11		24.1196
G12	DN9	25.4652	25.3501	15.7467	9.60344		0.0774372	0.94774
H12		25.2351

## Sheet: Iglon5
	qPCR Data Analysis
Well	Sample Name	Cт	Cт Mean	Cт Mean_RPL19_2	ΔCт	Average	ΔΔCт	Power	Average
A7	AN1	26.8357	26.901	15.4813	11.4197	11.0202	0.399521	0.75811	1.04824
B7		26.9663
A8	AN2	25.3116	25.3123	15.0425	10.2698		-0.750415	1.68228
B8		25.313
A9	AN3	26.3811	26.3923	14.842	11.5503		0.530128	0.692493
B9		26.4035
A10	AN4	26.3124	26.3147	15.076	11.2387		0.218489	0.859465
B10		26.317
A11	AN6	26.111	26.0836	15.2098	10.8738		-0.146363	1.10678
B11		26.0562
A12	AN7	26.6685	26.588	15.8192	10.7688		-0.251361	1.19033
B12		26.5076
C7	BN1	25.9305	25.8738	16.1397	9.73405		-1.28615	2.43876	1.13536
D7		25.8171
C8	BN2	26.4531	26.3191	14.6312	11.6879		0.667653	0.62953
D8		26.1851
C9	BN3	26.5341	26.4794	14.8154	11.664		0.643835	0.64001
D9		26.4247
C10	BN5	26.2636	26.2925	14.9754	11.3172		0.296967	0.813962
D10		26.3215
C11	BN7	26.0255	25.8907	15.3527	10.5381		-0.482146	1.39682
D11		25.7559
C12	BN9	26.5398	26.5051	15.3218	11.1833		0.163099	0.893105
D12		26.4703
E7	CN2	25.9638	25.9396	14.8322	11.1075	10.8091	0.298312	0.813203	1.03141
F7		25.9155
E8	CN3	26.3545	26.2737	14.8534	11.4203		0.611147	0.654676
F8		26.1928
E9	CN6	25.9247	25.9553	15.4398	10.5154		-0.293715	1.22579
F9		25.9858
E10	CN7	26.3761	26.307	15.8975	10.4094		-0.399719	1.31925
F10		26.2378
E11	CN8	26.3053	26.1948	15.6905	10.5044		-0.304789	1.23524
F11		26.0844
E12	CN9	26.0934	26.0983	15.2004	10.8979		0.0887653	0.940327
F12		26.1033
G7	DN1	27.8499	27.7154	15.3872	12.3282		1.51902	0.348923	0.527956
H7		27.5809
G8	DN2	26.952	26.9732	15.106	11.8673		1.05815	0.480247
H8		26.9945
G9	DN3	26.2449	26.2114	15.2012	11.0102		0.201045	0.86992
H9		26.178
G10	DN4	27.6929	27.6654	14.7792	12.8863		2.07716	0.236981
H10		27.638
G11	DN7	27.7635	27.695	14.7311	12.9639		2.15478	0.224567
H11		27.6266
G12	DN9	26.5296	26.5456	15.7467	10.7989		-0.0102048	1.0071
H12		26.5616

## Sheet: Rnf157
	qPCR Data Analysis
Well	Sample Name	Cт	Cт Mean	Cт Mean_RPL19_2	ΔCт	Average	ΔΔCт	Power	Average
A7	AN1	27.8989	27.9407	15.4813	12.4594	12.0623	0.397145	0.75936	1.06907
B7		27.9825
A8	AN2	26.4022	26.3557	15.0425	11.3132		-0.749099	1.68074
B8		26.3092
A9	AN3	27.3205	27.411	14.842	12.569		0.506751	0.703805
B9		27.5014
A10	AN4	27.6979	27.7463	15.076	12.6703		0.608076	0.656071
B10		27.7948
A11	AN6	26.9291	27.0116	15.2098	11.8019		-0.260401	1.19781
B11		27.0942
A12	AN7	27.383	27.379	15.8192	11.5598		-0.502472	1.41664
B12		27.3749
C7	BN1	27.2153	27.1949	16.1397	11.0552		-1.00711	2.00988	1.1913
D7		27.1744
C8	BN2	26.9711	26.9483	14.6312	12.317		0.254767	0.838122
D8		26.9255
C9	BN3	27.1522	27.2036	14.8154	12.3882		0.325939	0.797779
D9		27.2549
C10	BN5	27.3649	27.3634	14.9754	12.388		0.325782	0.797866
D10		27.362
C11	BN7	26.5256	26.5145	15.3527	11.1619		-0.900403	1.86659
D11		26.5034
C12	BN9	27.7002	27.6398	15.3218	12.318		0.255766	0.837543
D12		27.5793
E7	CN2	26.8732	26.9227	14.8322	12.0905	11.6822	0.408312	0.753504	1.07106
F7		26.9722
E8	CN3	27.38	27.4159	14.8534	12.5625		0.88032	0.543247
F8		27.4518
E9	CN6	26.7459	26.736	15.4398	11.2961		-0.386094	1.30685
F9		26.726
E10	CN7	26.875	26.7902	15.8975	10.8926		-0.789596	1.72859
F10		26.7054
E11	CN8	27.4081	27.4856	15.6905	11.7951		0.112883	0.924738
F11		27.563
E12	CN9	26.6179	26.6568	15.2004	11.4564		-0.225826	1.16945
F12		26.6957
G7	DN1	28.7694	28.7829	15.3872	13.3957		1.71351	0.304917	0.479642
H7		28.7965
G8	DN2	27.8643	27.8166	15.106	12.7106		1.02838	0.49026
H8		27.7689
G9	DN3	27.1842	27.4156	15.2012	12.2144		0.532142	0.691527
H9		27.647
G10	DN4	29.3465	29.4849	14.7792	14.7058		3.02356	0.122975
H10		29.6233
G11	DN7	28.3907	28.4716	14.7311	13.7405		2.05828	0.240103
H11		28.5524
G12	DN9	27.3464	27.389	15.7467	11.6423		-0.0399402	1.02807
H12		27.4316

## Sheet: St6galnac6
	qPCR Data Analysis
Well	Sample Name	Cт	Cт Mean	Cт Mean_RPL19_2	ΔCт	Average	ΔΔCт	Power	Average
A7	AN1	32.0007	32.3956	15.4813	16.9144	17.6229	-0.708536	1.63415	1.07805
B7		32.7906
A8	AN2	32.8909	32.6342	15.0425	17.5917		-0.0312378	1.02189
B8		32.3775
A9	AN3	32.5238	32.3882	14.842	17.5462		-0.0767175	1.05462
B9		32.2525
A10	AN4	34.5994	33.9679	15.076	18.8919		1.26897	0.414956
B10		33.3364
A11	AN6	32.2936	32.681	15.2098	17.4712		-0.151736	1.11091
B11		33.0683
A12	AN7	33.8965	33.1413	15.8192	17.3222		-0.300742	1.23178
B12		32.3862
C7	BN1	34.0283	33.6168	16.1397	17.4771		-0.145822	1.10636	1.17756
D7		33.2054
C8	BN2	32.7593	32.4605	14.6312	17.8293		0.206364	0.866719
D8		32.1617
C9	BN3	32.8134	32.8924	14.8154	18.077		0.454096	0.729967
D9		32.9713
C10	BN5	32.1318	32.0175	14.9754	17.0421		-0.58081	1.49569
D10		31.9031
C11	BN7	33.2364	32.9301	15.3527	17.5774		-0.0454707	1.03202
D11		32.6238
C12	BN9	32.0569	32.0692	15.3218	16.7475		-0.875458	1.83459
D12		32.0815
E7	CN2	32.2265	32.3966	14.8322	17.5645	17.0464	0.518062	0.698309	1.10494
F7		32.5667
E8	CN3	32.0766	32.3644	14.8534	17.511		0.464631	0.724657
F8		32.6522
E9	CN6	32.9318	32.9198	15.4398	17.48		0.433596	0.740414
F9		32.9078
E10	CN7	32.1229	31.9309	15.8975	16.0334		-1.013	2.01811
F10		31.7389
E11	CN8	32.6533	33.0503	15.6905	17.3598		0.313423	0.80473
F11		33.4473
E12	CN9	31.8687	31.5301	15.2004	16.3297		-0.716709	1.64343
F12		31.1915
G7	DN1	33.1531	33.166	15.3872	17.7788		0.732415	0.601896	0.488684
H7		33.1789
G8	DN2	33.9447	33.1293	15.106	18.0233		0.976933	0.508059
H8		32.3138
G9	DN3	33.3675	33.1727	15.2012	17.9715		0.925128	0.526634
H9		32.978
G10	DN4	34.9592	35.1443	14.7792	20.3652		3.31878	0.100218
H10		35.3294
G11	DN7	33.2025	33.331	14.7311	18.5999		1.55346	0.340691
H11		33.4594
G12	DN8	33.5031	33.0198	15.7467	17.2731		0.226666	0.854607
H12		32.5364

## Sheet: Ankrd29
	qPCR Data Analysis
Well	Sample Name	Cт	Cт Mean	Cт Mean_RPL19_2	ΔCт	Average	ΔΔCт	Power	Average
A7	AN1	27.8375	27.932	15.4813	12.4507	12.4437	0.00703128	0.995138	1.05364
B7		28.0264
A8	AN2	26.7476	26.7937	15.0425	11.7512		-0.692496	1.61608
B8		26.8398
A9	AN3	27.9288	27.9509	14.842	13.1089		0.665228	0.630589
B9		27.973
A10	AN4	27.9634	28.0115	15.076	12.9355		0.491802	0.711136
B10		28.0596
A11	AN6	27.5857	27.5738	15.2098	12.364		-0.0796936	1.05679
B11		27.5618
A12	AN7	27.7722	27.871	15.8192	12.0518		-0.391871	1.31209
B12		27.9698
C7	BN1	27.7678	27.6979	16.1397	11.5581		-0.885544	1.84746	1.14633
D7		27.628
C8	BN2	27.1326	27.1787	14.6312	12.5474		0.103735	0.93062
D8		27.2247
C9	BN3	27.7145	27.5781	14.8154	12.7628		0.319083	0.801579
D9		27.4417
C10	BN4	27.4052	27.4225	14.9754	12.4472		0.00348266	0.997589
D10		27.4399
C11	BN5	27.3457	27.2771	15.3527	11.9245		-0.519215	1.43318
D11		27.2085
C12	BN8	27.9527	27.9704	15.3218	12.6487		0.204976	0.867553
D12		27.9881
E7	CN2	27.3246	27.3546	14.8322	12.5225	12.2722	0.250221	0.840768	1.02583
F7		27.3847
E8	CN3	27.5748	27.5394	14.8534	12.686		0.41377	0.750659
F8		27.504
E9	CN6	27.7227	27.6022	15.4398	12.1623		-0.109903	1.07916
F9		27.4817
E10	CN7	27.6023	27.5813	15.8975	11.6837		-0.588511	1.50369
F10		27.5602
E11	CN8	27.8339	27.8835	15.6905	12.193		-0.0792527	1.05647
F11		27.933
E12	CN9	27.5792	27.5863	15.2004	12.3859		0.113676	0.92423
F12		27.5934
G7	DN1	28.9634	29.0093	15.3872	13.6221		1.34981	0.392343	0.541117
H7		29.0552
G8	DN2	28.1464	28.086	15.106	12.9801		0.707815	0.612247
H8		28.0256
G9	DN3	27.7362	27.7199	15.2012	12.5186		0.246388	0.843005
H9		27.7035
G10	DN4	29.0001	28.9103	14.7792	14.1311		1.8589	0.275687
H10		28.8205
G11	DN7	29.3055	29.2235	14.7311	14.4924		2.22012	0.214623
H11		29.1415
G12	DN8	28.2456	28.1569	15.7467	12.4102		0.137967	0.908799
H12		28.0683
