# Supplementary material for: A preliminary study of the effect of a high-salt diet on transcriptome dynamics in rat hypothalamic forebrain and brainstem cardiovascular control centers
Source: PeerJ. 2020 Mar 3;8:e8528. doi: 10.7717/peerj.8528 (PMC7059759; doi:10.7717/peerj.8528)
Supplement: Table S1 [file peerj-08-8528-s001.xlsx]

## Sheet: Primer Seqs
Supplemental Table S1: Sequence of oligonucleotide primers
No	Primer Name	Sequence
1	Fut11 FP	CGCTGCTCTATTTGCAGTCC
	Fut11 RP	CTTGCCATAGGAATCCACCG
2	Kcnab2 FP	GAGGGATACCGCTCACTCAG
	Kcnab2 RP	GAACTCTGGCTCTCATTGGC
3	Sv2c FP	GGAAGAGTGGCAGACCGAA
	Sv2c RP	GCAACAGCATCATCCACTCA
4	Gmfg FP	GGACCCGGAGCTAAAGGAAA
	Gmfg RP	GCGGCATTGTTGGTCTCTTT
5	Rmrp FP	CCTGCTCTCTGGGAACTCAC
	Rmrp RP	CCTCACCTCAGCCATTGAAC
6	Lin52 FP	GCATATTGGGTGCTTAGCCAG
	Lin52 RP	CAGTCAGGAGTCATCTTTGGC
7	Apopt1 FP	CTGGAGAGGATGTGGAGCAA
	Apopt1 RP	CCGCTTGTCTTCTTTGGCTT
8	Mrps18c FP	TGCGTCTTGTGTGAGAAACG
	Mrps18c RP	ACCTGTTATGTGCCTTCCGT
9	AVP FP	GCTCTCCGCTTGTTTCCTGA
	AVP RP	TGGGCAGTTCTGGAAGTAGCA
10	Sim1 FP	AGAAAGGGAGCCTGAGACAC
	Sim1 RP	TGATCGAGGCTTTGTCCAGT
11	Pdyn FP	CCACTCCAGATACACTTCACCA
	Pdyn RP	GACCACGCCATTCTGTATCAC
12	OXT FP	ACCTGGATATGCGCAAGTGT
	OXT RP	GTAGTTCTCCTCCTGGCAGC
13	Th FP	TCTCTGACCAGGTGTATCGC
	Th RP	GTTCACCGTGCTTGTACTGG
14	Crip1 FP	GTCCAGAGCCTACAACCTACT
	Crip1 RP	ATGCCAGTCCTTGCCTAGTG
15	Hbb FP	TGGGGAAAGGTGAACCCTG
	Hbb RP	CCCATGATAGCAGAGGCAGA
16	Glod5 FP	CCGCCATGTAGCATTATCTGC
	Glod5 RP	ACGGACTCTCAGATGTTGGA
17	Fam166a FP	TTGCTCACAGATCCCAGTGT
	Fam166a RP	GGTGGCTTGGATTTGCTGAA
18	Ifi27l2b FP	AGAACTACTCGCCTGCTACC
	Ifi27l2b RP	CAATGCCTGACCCAGTGAAG
19	Irx2 FP	CAAGCTCAGCAGTGCAAGTA
	Irx2 RP	CCAAGAGGCAAAACCACACC
20	Uros FP	CACTTGCCTTCCCAGGTAGTA
	Uros RP	GGCAGTGTTGGAGGGATAGA
21	Scube1 FP	TGGGGAGAGCACAGAGATATG
	Scube1 RP	CCCGTCAATGCTTCAACACA
22	Capns1 FP	TGACCGATCAGGGACCATTG
	Capns1 RP	GGAATCCTGCTGCCTCAAAG
23	Ptgds FP	CTCGCCTCCAATTCAAGCTG
	Ptgds RP	TCACCTTGGTCTCACACTGG
24	Caprin2 FP	CAGGGTTAAGTGCAAGCGAT
	Caprin2 RP	CTGGTGGTTGACTGGTTGAG
25	Sctr FP	CGAGCTTCCTCGGAGATCAA
	Sctr RP	AAGTCATGGGTCCGTTTCCT
26	Procr FP	TTGTAACTCCGATGGCTCCC
	Procr RP	AGTTTTCCCAGAGAGGCGTT
27	Slc12a1 FP	GTGAAAGGTGTGCTGGTGAG
	Slc12a1 RP	CTGTCACTGTCACGGCTAAG
28	Vamp8 FP	GAAGCCACGTCTGAACACTT
	Vamp8 RP	GCCCGTAGCAAAGAGTATGATG
29	Ndufaf2 FP	CGGACCATCTGGGGAACAAA
	Ndufaf2 RP	CTCTCGCATAGTCTGCCCTC
30	Oacyl FP	CCTGACGGGTTGAGAAATGAC
	Oacyl RP	AAACAAAAGGGAACAGAGCGT
31	Rxfp3 FP	GTTCTGGCTGGGTTTGTACC
	Rxfp3 RP	CTGTTGCTCCATCCGTTGTC
32	Gpr101 FP	TGGGTCGGGGCTACATTATT
	Gpr101 RP	ACCATACCACGGGACTCTCT
33	Ctif FP	CATCACGGCAACATGAAGCA
	Ctif RP	CAACGGTCACGGTCTCTTTG
34	Cgref1 FP	CAAATGAACCGGGAGCAAGT
	Cgref1 RP	TCCGTTCTGGTCAAAGTCGT
35	Ttr FP	TGCCTCGCTGGACTGATATT
	Ttr RP	AGCATCCAGGACTTTGACCA
36	Kl FP	AAGAAAGGCCGGAGACGTTA
	Kl RP	CGTGCGTACTGATCCCAAAG
37	Tmem72 FP	AAGTTCCTCGCCTACATGCT
	Tmem72 FP	GGAGCCTGGTATGGTCACAT
38	F5 FP	ACTGGCGTCAACACTAGGAA
	F5 RP	AGCGAGAGCAGTGAGATTGA
39	Clic6 FP	GGCATTTGGCGGTACTTGAA
	Clic6 RP	GCGTGTTCAATCTCCTGGTC
40	Lrp1b FP	TCTCCAGAAGAACCGCATGT
	Lrp1b RP	AGGCATCAGAGCATCCACTT
41	Rgs7bp FP	GCCACTCCAACTCCGTATACTA
	Rgs7bp RP	GAGAATGATGCTGGGGACTG
42	Msr1 FP	CAAGTTGTCTGCCGGAGTCT
	Msr1 RP	GACGATTCTCTCCCAAAGCAC
43	Kcnv1 FP	TGCTATGAAGAAGTCGGCCT
	Kcnv1 RP	CACCATGCACAAGGAACACT
44	Hpcal4 FP	CGACTTCCGGGAGTTCATCT
	Hpcal4 RP	CGTCCAGGTCGTACATCTCA
45	Npy FP	CTCGTGTGTTTGGGCATTCT
	Npy RP	AGAGCGGAGTAGTATCTGGC
46	Mir331 FP	AGTCTGGTCTTGTTTGGGTTTG
	Mir331 RP	AGGGGCCTGGTTTGATCTG
47	Sumo2 FP	GCTCAGTCAGCTCCTATCTCT
	Sumo2 RP	CCAATCGAACAAGGTATGCGA
48	Myl1 FP	CAGTCCCGCTGCTGTTTTG
	Myl1 RP	CTCTTGCCCAACTGTCTCCTT
49	Calr4 FP	CTGGAATGAGGCAATGGATGG
	Calr4 RP	ATTTCCCCACCTTGTTGACATTT
50	Igkc FP	CCACAGTCGTGTGCTTCG
	Igkc RP	GACACCATCTCGTTGTTCACTG
51	Slco1a2 FP	CTTGGTTAAGCCAGATTGCGT
	Slco1a2 RP	TGAAAACAGGAGATGGCACAC
52	Slc4a5 FP	ACACAGACCAGCGGAAAAAC
	Slc4a5 RP	GAAGACTGGGCAAGACGAAC
53	Prr32 FP	AGTCCCTAGCAACAGCAGAA
	Prr32 RP	CCATAGGGCTTGCAGAGACT
54	Igh-6 FP	GGTTGTGAGCTGGATTCGTC
	Igh-6 RP	TTGGGTGTTGGAGGTGTTCT
55	Zbtb12 FP	TGGAGTACAGCACTTCCCTG
	Zbtb12 RP	ACCCACCTCAAGAAACGCTA
56	Diras1 FP	GGAACAAGTGTGACGAGACG
	Diras1 RP	GGAACAGCTCCTTCACGTTG
57	Trim44 FP	TTGGCGGACATCCAATCTCA
	Trim44 RP	CTGGGCCATCTGAGTCATCA
58	Lgals1 FP	GCAACAACCTGTGCCTACAC
	Lgals1 RP	TCGTCCTTGCTGTTACACAC
59	Imp3 FP	CTAGAACTCTGCGACTCCGT
	Imp3 RP	GAGGAGCAAAGTAGGCAAGC
60	Dnah1 FP	GACAACGCCAACATCACCTT
	Dnah1 RP	CTCAGCCACGTCTTCCACTA
61	Cfap44 FP	AGGAAGGAGACCTGACAACG
	Cfap44 RP	GCTCTGCCTTCTCAAACTCG
62	Mpv17l2 FP	GCTGTCCCGGTTTTCTACTG
	Mpv17l2 RP	ACTTCAAGGCCGTAGAGCAT
63	Nostrin FP	CACACCAAGTCCTGAGTATGC
	Nostrin RP	AGGGCTTCATGCTTCTTCGT
64	Srr FP	CCACTTGGTTCTCAGTTCCAC
	Srr RP	CTTCAGCAGAGGTAGGTGTGA
65	Tmem70 FP	TAAGTAAGGGCTGAGGACGC
	Tmem70 RP	ACTGGGTAAATGAAGGCCGA
66	Map7d1 FP	AGCGGTCAGTGAAGAAGACA
	Map7d1 RP	CGTGTTTGGGCAGGTTTACT
67	Pi4k2a FP	CTACGGCGTTTTGAAGCAGA
	Pi4k2a RP	AACCAGTTGTCATTGCCTCG
68	Mgp FP	GCCGAGGAGCCAAATAAGAG
	Mgp RP	ACTCCGTAACAAAGCGACTG
69	Lrrc8c FP	GGACCACAGATGTTCAGAGAAGT
	Lrrc8c RP	AGAGGTAGTCCGTGAACACAT
70	Syce1l FP	CTGGGAGCTGAGAAAGCTGAA
	Syce1l RP	TTCCGTCGTATTCAGAGAGGT
71	B3galt1 FP	AAGACCTCACTCCACACCAG
	B3galt1 RP	GGATGTATGCCCAGCTTTCG
72	Fam189b FP	TTCTCCTTGCTTTCGGTGC
	Fam189b RP	ATACGCAGACTTTCCCTTCCAT
73	Tnrc18 FP	AAGGTACAGGGAAGGATCGC
	Tnrc18 RP	CGTGGGTCTTTCTTGCCAAA
74	Prrc2a FP	CTGCTCCACCTCCTCTTTCT
	Prrc2a RP	CTGGCGGGTGAAGGTAAGA
75	Sec14l3 FP	GGAGATGACCGAGGTGCTAA
	Sec14l3 RP	TCTTGGCATGGACGAAGCTA
76	Pomp FP	GATGGAGTTCAAGGCTGTGC
	Pomp RP	CGCCCATCAGTTCACTTTGT
77	Sclt1 FP	TGGCAGCTCAACAAAAGACG
	Sclt1 RP	CGGCTCAGCTCACTCCTATT
78	Nsmce1 FP	TGGGTACGTTTGTAGCCTCA
	Nsmce1 RP	GCATGTTGGAAGGAGCAGAA
79	Isy1 FP	ACCTTTCCTTGCTTCCGAGT
	Isy1 RP	ATGATCTGCCGTCTCCACTT
80	Orc6 FP	CGGATCTTGTAAGGCACCTC
	Orc6 RP	TTCACTTTAGACAGCCGCAG
81	Pcca FP	GGACAGGAACCAGTTGCG
	Pcca RP	TGAGGACCTTGGTGATGCTT
82	Abcg3l1 FP	GGGAAGAAGCCAGGGACTC
	Abcg3l1 RP	TGGGATTACAATGGGGTCGT
83	Gkap1 FP	GCGGAACAATGGGAAGTCTC
	Gkap1 RP	GTTTGCTTCACTCTGCTGCT
84	Ift74 FP	GACTCTCGGTTAGGCTCCTC
	Ift74 RP	GGACGCCACTAGGACTCTAC
85	Kcng1 FP	AGGCCACCAAAGGAGAAGAA
	Kcng1 RP	GGCATAACGTTCGAGGACAC
86	Mpp3 FP	CGGGAGGGTTGGAGAGTTG
	Mpp3 RP	GTGGGTGGGAGAGGAATCTT
87	Tmem114 FP	CGTGCAAGTGGAATCGCTTA
	Tmem114 RP	TGGAATCCGGCTCAAACTCT
88	Rnasek FP	TCGTCTCAATAAGCGCAAGG
	Rnasek RP	GTCTCGCCAGGGTAACAGT
89	Stard3 FP	CGACTGAAGCAGGAAGAGTG
	Stard3 RP	TGAAGTGGGGACAATGGAGC
90	Msi2 FP	GCACAGCCTAAGATGGTCAC
	Msi2 RP	CATCCACCTTTCCGAACTGC
91	Ube2f FP	GTGCTCAGAAGAAAGGTGGC
	Ube2f RP	AGACCATCATCCCGCTTCAA
92	Frmpd3 FP	TAATAGCCCATTCCTCCTCCTTC
	Frmpd3 RP	AATGAAGCAGTGCCGCCT
93	Pcbd2 FP	AGATGAATCACCACCCGGAA
	Pcbd2 RP	TCAAAGGCGATCACCGAGAA
94	Mir410 FP	TGAGGAGAGGTTGTCTGTGAT
	Mir410 RP	GGCCATCTGTGTTATATTCGTCA
95	Dpysl3 FP	CATACGTGAGTGTGCGACAA
	Dpysl3 RP	CAACCTTACTACAGCCTCAGC
96	Fbxw8 FP	GTTTTGTGTGACGTGCGTTC
	Fbxw8 RP	GGGTAAGAAACGGCAAGAGC
97	Gpd1l FP	AGTTCTGCGAGACCACCATT
	Gpd1l RP	TCATCCACCACCGTGATTCT
98	Luzp1 FP	GACAGCGACTGTTTCCAAGA
	Luzp1 RP	TGGGGTGGGGAAGTTGATTAT
99	Naa38 FP	ACCAAATCTCCAGGCGTTTC
	Naa38 RP	CAGGTTCCTAGATGCCGACT
100	Akr7a2 FP	AAAATTGCCACCAAGGCCAA
	Akr7a2 RP	CGTCTCTAATTGGGACCGGA
101	Elp5 FP	GAGAAGCCCGGAACGATGT
	Elp5 RP	ATAGAGGTCGCACGAGATCC
102	Lcmt1 FP	CGCCTATCGCGCCTTATC
	Lcmt1 RP	AAACGGGGAAAAGAGCAGTG
103	Pex16 FP	CTTATTTCCCCAGGCCCTCAA
	Pex16 RP	GTCCAAGTTCCCACCCAGTT
104	Sirt6 FP	TAGACAATGGGAGGGACTTGG
	Sirt6 RP	ACTCCCTGGCTTGACGATT
105	Fam213b FP	GGCAGGAGAAAGCTTGTGTG
	Fam213b RP	CTAGGCGCACATCGTTTTGG
106	Pam16 FP	CAGTCAAAGGTTGTCCGTGC
	Pam16 RP	CCTGGGCTTGTATTCGGAGT
107	Hhatl FP	CCTCTTCAAGCCCTCTCCAG
	Hhatl RP	CCTTCCTGTGTGCTCCATCT
108	Nkain4 FP	GGGATGACGGCTTGGACTTA
	Nkain4 RP	CAAGAAAACACAGCAGGGCA
109	St6galnac6 FP	GTACTGGATTCATTGGGTCTGG
	St6galnac6 RP	GATGAGAGCAAAGAGGACCAC
110	Prtfdc1 FP	ATTGGTGAAGAGGACAGCGA
	Prtfdc1 RP	CGAATCCAGCATAGTCAGGTC
111	Ankrd29 FP	GCAGATCCAGCCTTGAGAAAC
	Ankrd29 RP	CGAGTTCATTCTTCCCAGGTC
112	Rhot2 FP	GTTGGGTCTAAGAGAACTGCAC
	Rhot2 RP	CTTCCTGTCTTCAGTACCGC
113	Cope FP	TCTGCTTCCCTCTGTCATGC
	Cope RP	TGCTACTCCGTCTCCAACAAT
114	Rnf157 FP	CCGTCCAATTCCGTGTACC
	Rnf157 RP	AGTTCAAGTCGCTGTTCTCG
115	Tmem98 FP	CCCCGCTTCTCTTGTACCTT
	Tmem98 RP	TCGCCTAGTGGTTGTGAAGT
116	Polr3k FP	GGTGAAGGACCTGGGTGAAT
	Polr3k RP	GACCTGAGAGCCGCTAACTT
117	Psmc4 FP	AGCATTCCGTTGGTCATTGG
	Psmc4 RP	CCACTGAGGCATTGGGTTTG
118	Znhit6 FP	TCGGTTTTTGGAAGACGTGG
	Znhit6 RP	CTGGGTAGCAGCCTCAAGTA
119	Rprd1a FP	ATCTCGTTTGCCCAATGTCAC
	Rprd1a RP	GGACTATTCACCTAACCTGTCTCC
120	Csrnp3 FP	CTGGGAGAGTTCGCAAGAGA
	Csrnp3 RP	TCCTCCGATTCTACAGTGCC
121	Snrpd2l FP	CTGGGTGCTCCAAAGGCTA
	Snrpd2l RP	CCTCTGGGGTCATCTCACTC
122	Romo1 FP	CGGCATTGGGAAAACCATGA
	Romo1 RP	GCCATGAAAGTGCCAAAGGT
123	En2 FP	GGCGGTTTGGGATTTTCTGT
	En2 RP	TCGCTGGACTTGGAATCCTT
124	Atp2a3 FP	GGGAAGCAGCATGGAGGA
	Atp2a3 RP	TCAGTAGGGAGTTCGTTGGG
125	Il16 FP	AGAAAGCAGCAAAGGCAGTG
	Il16 RP	CACGCTTCTTCCTCTCCTGT
126	Sepw1 FP	GCCGTTCGAGTCGTGTATTG
	Sepw1 RP	TGAGCTGGAGATACTTGGGC
127	Ddn FP	AATAGCAGAGCTGGGGTCAA
	Ddn RP	GCTTGGATGCTAATGGGTCC
128	Tmsbl1 FP	GAGTAGCTGCGGACAGAATTG
	Tmsbl1 RP	CTCATCTTGACTGCTCGTTCC
129	Ccdc150 FP	AGGTGGCTGGAAGAGAATCA
	Ccdc150 RP	AGAACAGATTGGCTGGTTGC
130	Tcf7l2 FP	ACATTAGCGAGAGGGTCGAG
	Tcf7l2 RP	AGTTTTGCACACGGTCAGTC
131	Iglon5 FP	GTCATCCACACAGGAAGCTGA
	Iglon5 RP	TCTCCTCTCTCCCAACTCTGT
132	Gabra6 FP	AGTCAGAGGAGGCTGGGTAT
	Gabra6 RP	GGAATAGGGTCGTTTGTGGTC
133	Fat2 FP	GAGAGGGACACGTCTGTTCA
	Fat2 RP	TGGGATGACAAGGGAAGCAT
134	Gabrd FP	CGCCAGAGCAATGAATGACA
	Gabrd RP	GCCCTCCATTAGTCCATCCA
135	Cbln3 FP	TCCCTACTATCGCTTTGCCT
	Cbln3 RP	CTGGACCATTGGGATAACGG
136	Neurod1 FP	CGAACCATCCACCGAGTTTG
	Neurod1 RP	CTATGGGGATCTCACAGCGA
137	Sall3 FP	CAAGTCGGACGAGGAGCTA
	Sall3 RP	CTTCTCACACACGCTGGTTT
138	Lef1 FP	TCTTCACTTTCAGGGGACACT
	Lef1 RP	GGATGAGGGATGCCAGTTGT
139	Kcng3 FP	CCGGAGCAGGATAATTGAAGC
	Kcng3 RP	GGGTGATTGCCAGTAAGTCG
140	Rae1 FP	GAAAACTGAGTCCCTCTCTGC
	Rae1 RP	CCACCAGTCCCAAAACCAGA
141	Ncor2 FP	AGGGAATGTCAGTGCAGCTT
	Ncor2 RP	CTTCTTAGGGTCCACAGCGA
142	Gmfb FP	AGTCGCCATCAATCACTCCT
	Gmfb RP	CCTAGACGGAAGCCCTTGAT
143	Ccne1 FP	GTACGGGCTGCCTGGATT
	Ccne1 RP	ATGGCTCAGGACTTGGAACT
144	Tph2 FP	CAGCCCGCAATGATGATGTT
	Tph2 RP	GAGAGTAGGAGCACAGGAGTC
145	Uts2b FP	CTGGCTGAACTCTGGAATGG
	Uts2b RP	CAGACTTCAGGCGAGCATAC
146	Nkain1 FP	CCCTAATGATGCTGAGATGCC
	Nkain1 RP	GGTAGCCCAGGAAATCGAAG
147	A4galt FP	CTGCCCAGGCTGACAAGT
	A4galt RP	GGTCTCCTCCAGATCCGAAC
148	Pnmt FP	TCTGTGGTTCCAGTGTCAGA
	Pnmt RP	TGATGTAGGTGCGAAGGTCT
149	Efna3 FP	GCATTGGAAGTGTCTGAGGAT
	Efna3 RP	CAACACGTTGATCTTCACATTGG
150	Kcnk15 FP	ATCCTGTGCATCCTGTCCTAC
	Kcnk15 RP	GACTCCAAAGCATCGAAGACC
151	Esm1 FP	AGCCTCTTGCTACTGACCAC
	Esm1 RP	GGCAATCCACCGCATACTTG
152	Cmc1 FP	AAGTTGAAGATGGTGACCTGC
	Cmc1 RP	TCTGGAGGTCGGAGTAAGTTG
153	Ly6h FP	CCACTTCCCTCTTTCGCTGT
	Ly6h RP	GGTCCCTTAGCAGATTCTCGG
154	Slc29a4 FP	ACCACAAGTACCCAGGAACC
	Slc29a4 RP	GGTGATCCTAGTGTGCAGGT
155	Rac3 FP	TTGTTCACCGCCAAACTCAA
	Rac3 RP	GGCTCCTCACGCTTTACAGA
156	Rnf5 FP	ACCTCTATTGTTGGCCCTGT
	Rnf5 RP	CTGGCTCCCTCGACCATAAA
157	Cfap53 FP	AGTTCAAGAAAAATGCGCTGC
	Cfap53 RP	TTCTTGGCGTTCCTCTTCCTT
158	Igfbp3 FP	GGGTAGCAAGGAGTGTGTCTT
	Igfbp3 RP	CCAAGCAAGAGGAACGATGAC
159	S100a6 FP	CTGAACACGGAATTAGAGGGAAC
	S100a6 RP	GGGAGCAGGATGAAGGATTCTA
160	Zrsr2 FP	CCTTGAATTCTGGGCAAGGG
	Zrsr2 RP	GCAGCCAGGCCAAAGC
161	Faim FP	TAGCTTGTGCCTCCAAACTG
	Faim RP	GGCTTAGACCACCCGACAT
162	Rpl19 FP	GCGTCTGCAGCCATGAGTA
	RPl19 RP	TGGCATTGGCGATTTCGTTG
