# Supplementary material for: A preliminary study of the effect of a high-salt diet on transcriptome dynamics in rat hypothalamic forebrain and brainstem cardiovascular control centers
Source: PeerJ. 2020 Mar 3;8:e8528. doi: 10.7717/peerj.8528 (PMC7059759; doi:10.7717/peerj.8528)
Supplement: Table S2 [file peerj-08-8528-s002.xlsx]

## Sheet: S2_SFO_SRSvsSHS
Supplemental Table S2: RNA-Seq datasets for SFO
	GeneName	GeneType	DESeq.shrRS.AvgCount	DESeq.shrHS.AvgCount	edgeR.foldChange	edgeR.PValue
ENSRNOG00000058660	SNORA79	ensembl	170.687	1197.61	6.97328	5.8318e-24
ENSRNOG00000057527	RNase_MRP	ensembl	2651.44	10963.3	4.11778	4.2909e-21
ENSRNOG00000059256	U6	ensembl	8.49084	197.465	23.039	2.66999e-20
ENSRNOG00000052040	U6	ensembl	8.15292	145.528	18.0694	5.30507e-20
ENSRNOG00000051585	SNORA22	ensembl	139.973	649.787	4.60093	6.14213e-18
ENSRNOG00000052624	U6	ensembl	2.7541	48.0853	16.6339	2.38281e-15
ENSRNOG00000054225	U6	ensembl	2.42454	62.4932	24.2025	6.84863e-15
ENSRNOG00000057500	SNORA79	ensembl	84.7158	329.267	3.85341	4.06764e-14
ENSRNOG00000061568	U6	ensembl	4.38757	49.7688	11.1544	2.19544e-13
ENSRNOG00000054493	Rmrp	ensembl	5339.07	13845.2	2.58321	2.02211e-12
ENSRNOG00000053909	7SK	ensembl	131.846	1117.48	8.43804	1.16617e-11
ENSRNOG00000061541	U6	ensembl	3.87475	60.2629	14.7288	4.57278e-11
ENSRNOG00000058555	7SK	ensembl	27923.1	72510.9	2.58269	8.75925e-11
ENSRNOG00000055311	U1	ensembl	31.5703	269.554	8.46103	3.21058e-10
ENSRNOG00000061299	LOC100134871	ensembl	492.413	1735.58	3.51481	3.56696e-10
ENSRNOG00000059030	U6	ensembl	2.62217	42.2245	15.9552	7.25755e-10
ENSRNOG00000058108	7SK	ensembl	116.847	414.375	3.53524	9.47411e-10
ENSRNOG00000059449	Metazoa_SRP	ensembl	770.975	4398.46	5.67403	1.21823e-09
ENSRNOG00000059882	U6	ensembl	2.17114	41.6715	18.1856	1.47345e-09
ENSRNOG00000059109	U1	ensembl	41.8286	293.447	6.96591	6.10055e-09
ENSRNOG00000060244	U6	ensembl	4.35064	47.9374	10.3352	6.84361e-09
ENSRNOG00000057113	U6	ensembl	2.91481	31.9106	10.1044	9.74736e-09
ENSRNOG00000002178	Mrps18c	ensembl	506.726	1179.28	2.31846	1.18108e-08
ENSRNOG00000051920	U1	ensembl	43.2623	278.911	6.39649	1.22701e-08
ENSRNOG00000060289	7SK	ensembl	21139.5	54202.3	2.5503	1.51876e-08
ENSRNOG00000056284	U6	ensembl	11.7232	60.7446	4.9815	1.54984e-08
ENSRNOG00000051626	U6	ensembl	3.98785	36.0023	9.18892	1.662e-08
ENSRNOG00000059522	U6	ensembl	2.21039	29.1733	11.6129	2.08082e-08
ENSRNOG00000052058	U6	ensembl	14.1349	76.4714	5.39154	2.21521e-08
ENSRNOG00000053929	RNaseP_nuc	ensembl	1692.22	5206.33	3.06333	4.45654e-08
ENSRNOG00000054045	Metazoa_SRP	ensembl	1706.05	4202.81	2.45178	4.76957e-08
ENSRNOG00000054419	U1	ensembl	44.1951	284.062	6.3936	5.21177e-08
ENSRNOG00000055207	U6	ensembl	2.54599	29.7933	11.3735	5.22956e-08
ENSRNOG00000052355	7SK	ensembl	111.778	281.598	2.51333	6.14012e-08
ENSRNOG00000056250	U6	ensembl	3.63574	39.3141	10.3329	7.34404e-08
ENSRNOG00000060374	Metazoa_SRP	ensembl	1875.83	4596.02	2.4383	8.46175e-08
ENSRNOG00000060547	U6	ensembl	3.97347	36.4508	9.28328	9.85155e-08
ENSRNOG00000058633	U6	ensembl	1.96303	24.6942	12.3589	1.05683e-07
ENSRNOG00000011542	Apopt1	ensembl	105.152	258.843	2.4491	1.31778e-07
ENSRNOG00000051460	U6	ensembl	1.67874	25.1998	14.814	1.32442e-07
ENSRNOG00000055105	U1	ensembl	42.8791	270.898	6.27409	1.67352e-07
ENSRNOG00000052258	U6	ensembl	3.469	30.6254	8.20728	1.78787e-07
ENSRNOG00000051852	U1	ensembl	43.048	277.346	6.4015	1.92714e-07
ENSRNOG00000056147	U6	ensembl	4.57081	35.2202	7.76502	1.97373e-07
ENSRNOG00000053739	U1	ensembl	32.8944	213.102	6.45149	2.151e-07
ENSRNOG00000053717	Metazoa_SRP	ensembl	1838.3	4346.89	2.35379	2.26324e-07
ENSRNOG00000060968	U6	ensembl	5.89141	34.1461	5.51476	2.28164e-07
ENSRNOG00000060836	U1	ensembl	46.873	259.462	5.50638	2.83599e-07
ENSRNOG00000051532	SNORA68	ensembl	10.217	50.385	4.95847	3.08141e-07
ENSRNOG00000052889	U6	ensembl	5.26317	45.6435	8.23815	3.23945e-07
ENSRNOG00000055825	Metazoa_SRP	ensembl	1889.27	4435.71	2.33694	3.26832e-07
ENSRNOG00000052862	Metazoa_SRP	ensembl	1881.44	4332.08	2.2917	3.2888e-07
ENSRNOG00000035543	Mir331	ensembl	95.0685	21.8925	0.229452	3.81304e-07
ENSRNOG00000053676	U6	ensembl	3.59649	29.7351	8.26444	4.81618e-07
ENSRNOG00000008516	LOC688684	ensembl	1007.98	1983.45	1.95677	4.91526e-07
ENSRNOG00000015320	Atp5g2	ensembl	815.325	1643.92	2.00706	5.11125e-07
ENSRNOG00000060816	SNORA48	ensembl	43.8325	205.372	4.66085	5.26356e-07
ENSRNOG00000060441	U1	ensembl	37.717	273.942	7.21239	5.65544e-07
ENSRNOG00000059466	AC126572.3	ensembl	17.6657	68.9178	3.87772	5.72393e-07
ENSRNOG00000061082	U1	ensembl	56.2453	299.699	5.30392	8.11137e-07
ENSRNOG00000023733	RGD1560821	ensembl	9.18923	57.6873	6.15187	1.04161e-06
ENSRNOG00000054722	U1	ensembl	44.1271	272.093	6.1363	1.09614e-06
ENSRNOG00000056751	U6	ensembl	2.82425	21.8829	7.04538	1.38159e-06
ENSRNOG00000061077	U6	ensembl	2.21039	24.6977	9.88402	1.51927e-06
ENSRNOG00000058083	Metazoa_SRP	ensembl	1876.32	4165.76	2.20985	1.78514e-06
ENSRNOG00000058031	7SK	ensembl	200.545	565.146	2.797	1.94806e-06
ENSRNOG00000002721	Ndufb4	ensembl	462.455	930.242	2.00078	2.00146e-06
ENSRNOG00000052607	SNORA12	ensembl	49.6174	190.55	3.81073	2.26274e-06
ENSRNOG00000061096	Rn7sl1	ensembl	1918.05	4309.98	2.23649	2.39021e-06
ENSRNOG00000059952	U6	ensembl	6.42074	41.3301	6.28532	2.55763e-06
ENSRNOG00000058306	AABR07060318.1	ensembl	9.06778	36.1516	3.88497	2.58339e-06
ENSRNOG00000058474	AABR07015941.1	ensembl	353.415	690.836	1.94197	3.35013e-06
ENSRNOG00000056170	U6	ensembl	2.57689	22.3871	8.6136	3.4205e-06
ENSRNOG00000060445	U1	ensembl	45.5629	273.049	5.96154	4.32977e-06
ENSRNOG00000054746	SNORA49	ensembl	13.3996	66.9766	4.95415	4.52535e-06
ENSRNOG00000052468	U6	ensembl	0.613858	13.4398	18.2767	4.79463e-06
ENSRNOG00000054091	SNORA38	ensembl	54.4334	150.802	2.75002	5.7824e-06
ENSRNOG00000054304	U6	ensembl	4.41846	24.7479	5.53899	6.75418e-06
ENSRNOG00000052180	Metazoa_SRP	ensembl	3.05278	27.777	8.70857	6.80272e-06
ENSRNOG00000056382	SNORA9	ensembl	23.5796	91.0047	3.82924	1.00411e-05
ENSRNOG00000061201	U1	ensembl	109.673	349.601	3.16426	1.02805e-05
ENSRNOG00000028747	AABR07073039.1	ensembl	1149.64	2178.24	1.88554	1.22588e-05
ENSRNOG00000052345	AABR07061453.1	ensembl	3.55957	19.9242	5.29755	1.24531e-05
ENSRNOG00000054623	U6	ensembl	3.98182	34.5063	8.35773	1.313e-05
ENSRNOG00000032224	LOC102551184	ensembl	119.144	301.865	2.52336	1.39553e-05
ENSRNOG00000052046	U6	ensembl	3.47736	23.3911	5.99953	1.51969e-05
ENSRNOG00000015550	Ptgds	ensembl	119886	66124.3	0.548654	1.52255e-05
ENSRNOG00000058444	LOC102548682	ensembl	1153.38	404.357	0.349189	1.60303e-05
ENSRNOG00000060878	AABR07066020.1	ensembl	39.2524	191.771	4.85978	1.65073e-05
ENSRNOG00000000167	Alas2	ensembl	304.817	627.572	2.05038	1.6562e-05
ENSRNOG00000004172	Pdk2	ensembl	143.132	287.054	1.99398	1.81012e-05
ENSRNOG00000015438	Ces1f	ensembl	1.45021	12.9879	7.94775	2.00339e-05
ENSRNOG00000056214	AABR07022098.1	ensembl	22.3708	67.8011	2.9978	2.32502e-05
ENSRNOG00000035529	Mir135a	ensembl	18.1952	51.3176	2.77845	2.49217e-05
ENSRNOG00000029886	Hba-a3	ensembl	3369.01	7417.2	2.19374	2.69519e-05
ENSRNOG00000056599	SNORA53	ensembl	5.45457	26.9749	4.9743	2.92694e-05
ENSRNOG00000003786	Tspan6	ensembl	1628.67	2918.21	1.78259	3.27748e-05
ENSRNOG00000018042	Mrpl48	ensembl	486.362	957.38	1.96316	3.42262e-05
ENSRNOG00000035556	Mir379	ensembl	96.0007	18.1657	0.190918	3.62966e-05
ENSRNOG00000011112	Fam161b	ensembl	269.883	514.255	1.89441	3.65634e-05
ENSRNOG00000058359	Fkbp8	ensembl	2848.12	1456.31	0.508858	4.15544e-05
ENSRNOG00000054114	U6	ensembl	1.38007	13.8881	10.0346	4.45907e-05
ENSRNOG00000028939	Rps29	ensembl	1813.11	3062.17	1.68039	4.54217e-05
ENSRNOG00000024603	Rps15	ensembl	733.764	1248.18	1.69432	4.81257e-05
ENSRNOG00000004196	Rps29	ensembl	660.153	1179.79	1.77952	5.48026e-05
ENSRNOG00000001243	Zcchc8	ensembl	1056.52	605.16	0.570288	5.4921e-05
ENSRNOG00000052742	U4	ensembl	7.73279	71.0235	9.12441	6.75419e-05
ENSRNOG00000059367	U1	ensembl	5.44039	28.8967	5.0075	6.92982e-05
ENSRNOG00000048456	LOC100360117	ensembl	253.515	449.578	1.763	7.30616e-05
ENSRNOG00000013250	Pdcd5	ensembl	1584.32	879.178	0.552603	7.59218e-05
ENSRNOG00000018471	LOC100362339	ensembl	607.089	1024.39	1.67864	8.07064e-05
ENSRNOG00000047185	Eif3i	ensembl	80.7369	180.982	2.24116	9.28915e-05
ENSRNOG00000060504	U6	ensembl	7.84006	28.8347	3.58099	0.000103205
ENSRNOG00000058533	SNORA55	ensembl	2.72321	14.9384	5.24064	0.000105121
ENSRNOG00000015557	Umod	ensembl	0	6.88494	57.261	0.000105387
ENSRNOG00000038539	Lrrc15	ensembl	1.38007	11.8137	8.55537	0.000106443
ENSRNOG00000021198	LOC684797	ensembl	90.6525	196.792	2.1574	0.000108343
ENSRNOG00000050490	Mir3064	ensembl	102.941	232.081	2.24486	0.0001095
ENSRNOG00000061739	Klrk1	ensembl	5.73674	22.0464	3.86512	0.000112917
ENSRNOG00000003086	Cenpv	ensembl	65.4762	141.727	2.15244	0.000117061
ENSRNOG00000054586	7SK	ensembl	246.752	560.824	2.25617	0.000119497
ENSRNOG00000054855	AABR07014855.1	ensembl	267.491	128.68	0.479076	0.000120125
ENSRNOG00000002574	Nubp1	ensembl	289.925	546.02	1.86962	0.000121415
ENSRNOG00000021229	Avp	ensembl	2256.18	27.8869	0.0123432	0.000122447
ENSRNOG00000050885	LOC100910526	ensembl_havana	0.659138	10.8073	14.6046	0.000131376
ENSRNOG00000053175	U6	ensembl	1.85596	13.2132	6.75493	0.000131778
ENSRNOG00000030478	AY172581.9	insdc	16269.1	35965.3	2.19684	0.000136181
ENSRNOG00000053606	SCARNA6	ensembl	409.798	826.005	2.00609	0.000138338
ENSRNOG00000057923	SNORA23	ensembl	43.3292	178.971	4.07656	0.000145628
ENSRNOG00000051129	Rn50_X_0677.1	havana	629.414	351.741	0.556837	0.000149634
ENSRNOG00000019838	Gmfg	ensembl	58.5655	155.864	2.63649	0.000163588
ENSRNOG00000028021	Rps13	ensembl	2027.15	3256.81	1.59891	0.000168377
ENSRNOG00000032542	Rps29	ensembl	1794.28	2919.41	1.61912	0.000169148
ENSRNOG00000054752	7SK	ensembl	1015.2	2226.49	2.1809	0.000169677
ENSRNOG00000053515	AABR07028568.1	ensembl	0.943427	10.023	9.56461	0.000181593
ENSRNOG00000000060	Cplx1	ensembl	1008.57	489.367	0.483004	0.000200184
ENSRNOG00000056247	7SK	ensembl	20087.5	43304.7	2.14414	0.000201487
ENSRNOG00000013564	Dok3	ensembl	4.64096	20.27	4.2631	0.000201508
ENSRNOG00000061887	7SK	ensembl	26.5978	62.7329	2.32017	0.000218959
ENSRNOG00000045570	LOC288978	ensembl	17.4492	61.1597	3.48561	0.000224802
ENSRNOG00000027799	Tmie	ensembl	432.419	754.605	1.73595	0.000234752
ENSRNOG00000050877	LOC100912538	ensembl	910.227	552.847	0.604142	0.000242677
ENSRNOG00000059069	LOC685085	ensembl	203.725	357.058	1.74677	0.000257924
ENSRNOG00000060332	7SK	ensembl	1563.4	3473.05	2.20937	0.000264395
ENSRNOG00000011290	Tm2d3	ensembl	36.7509	81.6176	2.19475	0.00026585
ENSRNOG00000016660	Cox5b	ensembl_havana	7948.82	4506.76	0.564591	0.000273052
ENSRNOG00000057509	AABR07019663.1	ensembl	194.401	364.427	1.86542	0.000273132
ENSRNOG00000016849	Ppp2r5d	ensembl	972.501	595.168	0.609391	0.000276378
ENSRNOG00000024159	Fcer1g	ensembl	296.846	170.255	0.571115	0.000277351
ENSRNOG00000009823	Naa38	ensembl	527.499	898.4	1.69409	0.000287127
ENSRNOG00000058105	Hbb	ensembl	2198.55	5450.44	2.47494	0.000298158
ENSRNOG00000018320	Rps15a	ensembl_havana	258.604	448.072	1.72456	0.000301343
ENSRNOG00000025212	RGD1565131	havana	69.1447	136.623	1.96438	0.00030234
ENSRNOG00000054692	U6	ensembl	2.14025	15.346	6.78738	0.000315367
ENSRNOG00000020296	LOC103693430	ensembl	73.7818	169.038	2.27722	0.000322669
ENSRNOG00000054769	U2	ensembl	173.101	393.932	2.26075	0.000337692
ENSRNOG00000008455	Tmem87a	ensembl	416.969	711.222	1.69868	0.000348678
ENSRNOG00000017552	Mrpl34	ensembl	77.0098	147.441	1.899	0.000359979
ENSRNOG00000061106	U2	ensembl	72.3179	167.066	2.29112	0.000366805
ENSRNOG00000060344	LOC100911371	ensembl	212.46	371.091	1.7382	0.000367961
ENSRNOG00000029456	Rp9	ensembl	43.9602	94.8076	2.1485	0.000390559
ENSRNOG00000008249	Brms1l	ensembl_havana	368.048	219.14	0.592324	0.000405105
ENSRNOG00000045644	LOC684762	ensembl	45.6654	98.2756	2.15359	0.000406951
ENSRNOG00000060621	U6	ensembl	2.49236	25.3772	10.3399	0.000413357
ENSRNOG00000020982	LOC100360647	ensembl	151.696	263.326	1.7273	0.000420495
ENSRNOG00000051966	U4	ensembl	0.867251	14.8465	14.472	0.000432504
ENSRNOG00000031532	AABR07018167.1	ensembl	2.39364	13.8856	5.46676	0.000434368
ENSRNOG00000011104	LOC100360057	ensembl	484.163	293.061	0.601805	0.000446986
ENSRNOG00000032844	RT1-Da	ensembl_havana	287.764	515.474	1.78145	0.000454993
ENSRNOG00000046133	AABR07033817.1	ensembl	45.7244	96.9864	2.08997	0.000455005
ENSRNOG00000058915	SNORD45	ensembl	5.04067	0	0.0234396	0.000470322
ENSRNOG00000046449	Npy	ensembl	72.8048	154.46	2.11795	0.000473461
ENSRNOG00000058301	7SK	ensembl	19811.5	41298.3	2.07329	0.000480173
ENSRNOG00000061462	U6	ensembl	0	5.48293	45.9706	0.000490146
ENSRNOG00000053752	7SK	ensembl	15791.2	31641.7	1.99334	0.00049883
ENSRNOG00000055003	AABR07058815.1	ensembl	0.329569	6.88258	16.2796	0.000499068
ENSRNOG00000026087	Igfn1	ensembl	37.0698	85.4974	2.29101	0.000527905
ENSRNOG00000028427	AABR07030524.1	ensembl	70.9561	30.0439	0.421497	0.000531608
ENSRNOG00000035480	Mir21	ensembl	21.4438	5.26477	0.248391	0.000538216
ENSRNOG00000059750	BC028528	ensembl	48.2935	117.906	2.41037	0.000552526
ENSRNOG00000051782	AABR07004061.1	ensembl	0.613858	8.95816	12.3497	0.000555486
ENSRNOG00000054912	U6	ensembl	23.9176	7.99854	0.339104	0.000621932
ENSRNOG00000054594	AC098022.2	ensembl	0.943427	11.5393	11.0438	0.000648249
ENSRNOG00000058039	Acta2	ensembl	259.137	95.4687	0.366931	0.000660531
ENSRNOG00000058674	AABR07031380.1	ensembl	126.098	53.3708	0.421862	0.000664554
ENSRNOG00000056195	U2	ensembl	24.649	62.2083	2.49467	0.000675207
ENSRNOG00000054184	U2	ensembl	25.9717	73.4126	2.78514	0.000700274
ENSRNOG00000058968	AABR07069840.1	ensembl	1.34917	11.7586	8.55228	0.000724296
ENSRNOG00000048523	Rpl8	ensembl	272.33	449.912	1.64176	0.000736468
ENSRNOG00000037600	Sim1	ensembl	308.321	10.8502	0.0353816	0.000736863
ENSRNOG00000054834	AABR07001734.1	ensembl	6.78724	38.1345	5.59608	0.000766001
ENSRNOG00000010597	Slc5a7	ensembl	827.797	389.424	0.468012	0.000766937
ENSRNOG00000051389	AABR07014424.1	ensembl	0	6.09689	51.0762	0.000767886
ENSRNOG00000007636	Cadps2	ensembl	2025.84	1334.88	0.656285	0.000791141
ENSRNOG00000060187	AABR07053516.2	ensembl	16.2301	49.5091	2.99948	0.000795372
ENSRNOG00000049862	Rnf157	ensembl	421.403	231.74	0.546494	0.000801645
ENSRNOG00000057568	SNORA84	ensembl	8.9607	26.4741	2.88066	0.000812209
ENSRNOG00000004731	Ano3	ensembl	670.153	408.446	0.607592	0.000813373
ENSRNOG00000056046	U6	ensembl	1.81068	13.3325	6.80829	0.00081344
ENSRNOG00000056755	7SK	ensembl	18930.1	39557.2	2.07841	0.000831993
ENSRNOG00000032063	Gfral	ensembl	42.8872	84.1893	1.95131	0.000833759
ENSRNOG00000060770	AABR07036376.1	ensembl	2.7541	13.4828	4.68838	0.000856556
ENSRNOG00000054536	AABR07070161.3	ensembl	10.5203	32.9742	2.98793	0.000869754
ENSRNOG00000004719	Pp2d1	ensembl	930.238	608.017	0.650441	0.00087207
ENSRNOG00000026686	Ddx4	ensembl	0	5.48529	45.911	0.000880219
ENSRNOG00000046263	AC107267.1	ensembl	7.17257	0.727263	0.114201	0.000887225
ENSRNOG00000027791	AABR07015346.1	ensembl	217.018	467.313	2.14199	0.000897266
ENSRNOG00000058116	AC118419.1	ensembl	139.491	64.2638	0.460924	0.000908202
ENSRNOG00000011568	Rspo3	ensembl	242.366	134.046	0.550328	0.000925093
ENSRNOG00000026036	Pdyn	ensembl	791.437	41.8191	0.0526232	0.000929088
ENSRNOG00000060561	Gdpd1	ensembl	392.899	623.146	1.57655	0.000939679
ENSRNOG00000054031	LOC102549726	havana	56.9581	110.875	1.93861	0.000940591
ENSRNOG00000059651	7SK	ensembl	14454.2	29926.1	2.05907	0.000976275
ENSRNOG00000057838	U1	ensembl	13.0947	40.0284	3.07089	0.000986856
ENSRNOG00000055947	7SK	ensembl	15028.9	30292.3	2.00484	0.000996708
ENSRNOG00000058749	7SK	ensembl	10.3861	27.4758	2.60508	0.000997852
ENSRNOG00000018680	Rpl17	ensembl	634.65	983.928	1.54255	0.00100434
ENSRNOG00000047151	LOC100911337	ensembl	210.351	356.009	1.6862	0.00102226
ENSRNOG00000008203	Synpr	ensembl	726.305	447.611	0.613984	0.00102569
ENSRNOG00000029173	Rpl22l2	ensembl	118.185	219.988	1.85489	0.00110474
ENSRNOG00000042535	LOC691033	ensembl	2.43057	15.2315	6.41668	0.00114145
ENSRNOG00000050932	Pfdn4	ensembl	405.815	648.668	1.59042	0.00116146
ENSRNOG00000035632	Mirlet7a1	ensembl	220.52	119.455	0.540667	0.00118995
ENSRNOG00000015496	Tpm4	ensembl	1757.32	1061.99	0.602232	0.00119892
ENSRNOG00000055745	AABR07043748.2	ensembl	80.3069	41.2458	0.513069	0.00119953
ENSRNOG00000060427	U6	ensembl	0.329569	5.93361	13.9951	0.00120115
ENSRNOG00000038592	AABR07032453.1	ensembl	70.7951	35.2658	0.493322	0.00121167
ENSRNOG00000061908	7SK	ensembl	10937.2	22255.3	2.02409	0.00121256
ENSRNOG00000060475	AABR07001555.1	ensembl	23.7796	51.7049	2.15636	0.00124685
ENSRNOG00000059584	U6	ensembl	6.36711	23.5174	3.69356	0.00132122
ENSRNOG00000048701	LOC682793	ensembl	231.912	414.229	1.77484	0.00133254
ENSRNOG00000058536	U6	ensembl	0	4.5912	38.1255	0.00133434
ENSRNOG00000056313	U6	ensembl	0	4.58765	38.1579	0.00134639
ENSRNOG00000013097	LOC691485	ensembl	10.5489	1.78954	0.17528	0.00136295
ENSRNOG00000020022	Psmc3ip	ensembl	243.202	419.382	1.71365	0.00137005
ENSRNOG00000060226	AC141937.1	ensembl	6.75264	0.336193	0.0668758	0.00137845
ENSRNOG00000021125	Prdx5	ensembl	865.47	566.838	0.651494	0.0013857
ENSRNOG00000043441	Lin52	ensembl	72.0457	179.774	2.46104	0.00142199
ENSRNOG00000006350	Tle6	ensembl	4.31974	16.0675	3.46094	0.0014243
ENSRNOG00000053714	7SK	ensembl	32.9463	69.8514	2.09731	0.00143589
ENSRNOG00000059949	LOC102549061	ensembl	251.572	153.054	0.606125	0.00144094
ENSRNOG00000059197	U6	ensembl	0	5.71426	46.9982	0.00147292
ENSRNOG00000009116	Itgb3bp	ensembl	104.678	206.658	1.9538	0.00147392
ENSRNOG00000059490	RNaseP_nuc	ensembl	2.36274	11.4154	4.52681	0.00149214
ENSRNOG00000025088	Tmc3	ensembl	0.360465	6.32822	14.7351	0.00149488
ENSRNOG00000059853	U6	ensembl	1.70964	11.2009	6.52916	0.00150467
ENSRNOG00000057562	U5	ensembl	6.19454	0	0.018944	0.00159094
ENSRNOG00000061081	U2	ensembl	199.715	427.37	2.12686	0.00162811
ENSRNOG00000053678	7SK	ensembl	0.329569	5.87755	13.9037	0.00166681
ENSRNOG00000005008	Angpt4	ensembl	9.35809	1.45453	0.162774	0.00167996
ENSRNOG00000017635	Inpp5a	ensembl	614.767	934.049	1.51259	0.00170583
ENSRNOG00000061528	U2	ensembl	68.806	150.497	2.16767	0.0017435
ENSRNOG00000026605	Ifi27l2b	ensembl	60.8007	117.302	1.91357	0.00174936
ENSRNOG00000007407	Ndufa12	ensembl	1541.15	1059.52	0.684121	0.00175194
ENSRNOG00000057006	7SK	ensembl	52.571	119.079	2.24371	0.00177747
ENSRNOG00000048993	Metazoa_SRP	ensembl	3538.49	6086.39	1.71281	0.00178907
ENSRNOG00000034258	Xirp2	ensembl	1.41096	10.0216	7.25352	0.0018191
ENSRNOG00000025378	Ccdc155	ensembl	17.462	5.26004	0.304077	0.00185683
ENSRNOG00000053706	Lonrf1	ensembl	266.843	154.764	0.57772	0.00185725
ENSRNOG00000015830	Ano9	ensembl	0.360465	7.00195	15.9716	0.00186471
ENSRNOG00000035477	Mir7a-2	ensembl	1.7345	9.51623	4.94594	0.00191977
ENSRNOG00000046313	Basp1	ensembl	2377.76	1407.48	0.58916	0.00195549
ENSRNOG00000007512	Srp14	ensembl	267.792	488.115	1.81131	0.00201813
ENSRNOG00000022014	Rab35	ensembl	1013.85	687.118	0.674624	0.00203765
ENSRNOG00000010144	AABR07019399.1	ensembl	75.5618	37.1007	0.487304	0.00204546
ENSRNOG00000027489	Mn1	ensembl	55.9273	22.056	0.393938	0.00207035
ENSRNOG00000048424	Paip2l1	ensembl	339.064	185.941	0.547348	0.00215651
ENSRNOG00000060293	Ndufa3	ensembl	45.3028	89.771	1.98427	0.0021585
ENSRNOG00000020442	Ubl5	ensembl	494.786	772.985	1.55641	0.00220353
ENSRNOG00000051354	Rn50_13_0843.1	havana	2.46379	13.7785	4.97828	0.00220788
ENSRNOG00000058335	AABR07051879.1	ensembl	130.812	68.098	0.517901	0.00222264
ENSRNOG00000030462	Ostn	ensembl	0	8.4597	69.6534	0.00225196
ENSRNOG00000047019	Bbip1	ensembl	34.3059	80.2479	2.30559	0.00230302
ENSRNOG00000025069	Ly9	ensembl	0.760179	6.77417	6.72473	0.00231079
ENSRNOG00000025055	Zdhhc19	ensembl	0	6.37348	53.2857	0.00232848
ENSRNOG00000032101	Morc1	ensembl	0	6.77755	56.1772	0.00234247
ENSRNOG00000020410	Th	ensembl	104.041	7.5455	0.0734511	0.00238963
ENSRNOG00000032204	Uqcrb	ensembl	2018.07	2987.46	1.47338	0.0024026
ENSRNOG00000008673	Arpc3	ensembl	2219.57	1502.38	0.673883	0.00241023
ENSRNOG00000013704	Cps1	ensembl_havana	1.34917	11.3115	8.18407	0.00242187
ENSRNOG00000058710	AABR07021465.2	ensembl	448.041	717.803	1.59257	0.00243836
ENSRNOG00000010758	Lpar2	ensembl	18.3806	6.2698	0.346368	0.00246092
ENSRNOG00000030316	Otogl	ensembl	1.70964	11.0302	6.495	0.00255376
ENSRNOG00000057119	U6	ensembl	4.08286	29.1873	6.82968	0.00255543
ENSRNOG00000022955	Vom2r66	ensembl	0	4.81527	40.3273	0.00260977
ENSRNOG00000003865	Tmigd1	ensembl	0	4.81527	40.3272	0.00261121
ENSRNOG00000037185	Rn60_7_1218.1	havana	91.6499	156.045	1.68788	0.00264944
ENSRNOG00000028403	Ptcd2	ensembl	137.898	237.476	1.71422	0.00271989
ENSRNOG00000057023	AABR07036374.2	ensembl	36.8754	12.2561	0.327405	0.00273913
ENSRNOG00000023576	RGD1305645	ensembl	101.607	188.66	1.84652	0.00277216
ENSRNOG00000061297	Metazoa_SRP	ensembl	1318.59	2349.22	1.77521	0.00279965
ENSRNOG00000043113	Fam43b	ensembl	12.2004	2.40468	0.211327	0.00280369
ENSRNOG00000053026	Shcbp1	ensembl	40.6087	17.2287	0.426553	0.00284695
ENSRNOG00000022537	E2f8	ensembl	14.3453	3.97724	0.274451	0.00285508
ENSRNOG00000041538	Mir1298	ensembl	17.1445	58.8763	3.39997	0.00286721
ENSRNOG00000059014	AABR07005950.1	ensembl	0	3.86157	32.3467	0.00290674
ENSRNOG00000053143	Rn50_7_1407.3	havana	0	3.86157	32.3467	0.00290808
ENSRNOG00000056532	AC126292.3	ensembl	18.99	42.4906	2.23512	0.00292746
ENSRNOG00000055190	AABR07032393.1	ensembl	30.3525	67.1955	2.20395	0.0029612
ENSRNOG00000053902	Metazoa_SRP	ensembl	15.2231	38.2853	2.45423	0.00300221
ENSRNOG00000024578	Ttyh2	ensembl	683.133	448.302	0.653179	0.00301364
ENSRNOG00000051638	U2	ensembl	187.05	370.723	1.96981	0.00302207
ENSRNOG00000021507	Luzp2	havana	738.546	473.751	0.638314	0.00306155
ENSRNOG00000026676	LOC500567	ensembl	0	5.20989	43.2756	0.00309271
ENSRNOG00000047898	Hist2h2aa3	ensembl	74.3094	133.055	1.77798	0.00313775
ENSRNOG00000057725	U6	ensembl	0	5.15265	42.9921	0.00317289
ENSRNOG00000016387	Rpl34	ensembl	52.1298	97.7395	1.86946	0.00319533
ENSRNOG00000008600	Sytl1	ensembl	11.5149	28.601	2.48182	0.00321775
ENSRNOG00000028238	Sh3bgr	ensembl	505.373	810.464	1.59552	0.00328813
ENSRNOG00000033803	Rpl37	ensembl	1240.27	2133.92	1.70946	0.0033449
ENSRNOG00000033449	LOC499573	ensembl	8.75027	23.4568	2.70864	0.00341751
ENSRNOG00000016413	Pstpip1	ensembl	39.0375	73.922	1.87325	0.00342689
ENSRNOG00000047893	AABR07055288.1	ensembl	26.9884	57.5382	2.14037	0.00343593
ENSRNOG00000003603	Arhgap44	ensembl	369.519	230.385	0.62048	0.00343779
ENSRNOG00000023917	AABR07034362.1	ensembl	196.387	117.88	0.595547	0.00347249
ENSRNOG00000057214	AABR07043510.1	ensembl	9.6628	34.8323	3.60376	0.00347251
ENSRNOG00000060328	AABR07072262.1	ensembl	0.720929	49.0315	61.2405	0.00348101
ENSRNOG00000061999	Rn60_12_0121.3	havana	5.00978	16.841	3.24093	0.00348703
ENSRNOG00000045963	LOC100360654	ensembl	1.45021	7.83526	4.79909	0.00354807
ENSRNOG00000032609	AY172581.18	insdc	1.37404	8.22869	5.09365	0.00361846
ENSRNOG00000055570	AABR07034940.2	ensembl	4.67788	40.0585	8.47081	0.00363675
ENSRNOG00000028015	Pf4	ensembl	189.114	334.399	1.76321	0.00368292
ENSRNOG00000057787	AABR07026986.1	ensembl	4.11163	0	0.0285073	0.00371088
ENSRNOG00000030747	LOC685963	ensembl	403.669	649.962	1.6003	0.00375226
ENSRNOG00000011817	Rpl22l1	ensembl	576.126	867.936	1.4981	0.00376027
ENSRNOG00000008314	Orc3	ensembl	907.477	1352.22	1.48221	0.00377116
ENSRNOG00000055189	AABR07010763.1	ensembl	0	5.70819	47.7398	0.00378858
ENSRNOG00000050784	AABR07054000.1	ensembl	99.596	52.9023	0.526922	0.00383268
ENSRNOG00000050560	Polr2i	ensembl	28.9318	58.2528	1.98135	0.00384723
ENSRNOG00000010019	Fam166a	ensembl	30.897	63.8631	2.04271	0.00385777
ENSRNOG00000057939	AABR07019253.1	ensembl	5.21789	0.392252	0.0874904	0.00387397
ENSRNOG00000023661	Celf2	ensembl	395.732	590.004	1.48441	0.00392035
ENSRNOG00000007778	Alox15b	ensembl	1.77143	9.34568	5.51571	0.00392094
ENSRNOG00000058244	SNORA42	ensembl	12.8559	3.52893	0.279113	0.00401412
ENSRNOG00000016737	Tcerg1l	ensembl	61.0947	24.6277	0.398193	0.0040541
ENSRNOG00000018706	Il15ra	ensembl	26.8594	53.9644	1.97929	0.00408079
ENSRNOG00000030447	LOC100364191	ensembl	144.593	242.933	1.66441	0.00410848
ENSRNOG00000054489	AABR07042821.1	ensembl	404.586	634.297	1.55784	0.00419927
ENSRNOG00000057887	U2	ensembl	59.2848	121.196	2.02853	0.0042051
ENSRNOG00000056956	Thap1	ensembl	189.563	118.419	0.621973	0.00424063
ENSRNOG00000053391	Rn50_18_0774.2	havana	0	5.98139	49.6023	0.00435875
ENSRNOG00000039581	AABR07027111.1	ensembl	9.91852	2.40705	0.252944	0.00437599
ENSRNOG00000039975	Tpbpa	ensembl	0	4.14289	34.8429	0.00441761
ENSRNOG00000019811	Timm23	ensembl	209.951	326.224	1.5474	0.00450097
ENSRNOG00000047098	LOC103694857	ensembl	139.098	305.934	2.19108	0.00452932
ENSRNOG00000015325	Pigf	ensembl	159.484	252.866	1.57923	0.00458729
ENSRNOG00000061260	U6	ensembl	1.34917	9.85833	7.11261	0.00460085
ENSRNOG00000008831	Hcn2	ensembl	152.481	78.1138	0.51036	0.00460373
ENSRNOG00000009331	Hck	ensembl	23.3239	48.6231	2.10307	0.00466763
ENSRNOG00000018994	Psmc4	ensembl	1372.8	2075.5	1.50634	0.00467301
ENSRNOG00000050036	AABR07030072.1	ensembl	0	4.36476	35.9629	0.00471843
ENSRNOG00000014054	Adam7	ensembl	0.720929	8.96289	11.8002	0.00473174
ENSRNOG00000031506	Ftl1	ensembl	105.58	179.192	1.69208	0.00473582
ENSRNOG00000037839	P2ry10	ensembl	9.97798	25.9008	2.62762	0.00478309
ENSRNOG00000053349	Rrh	ensembl	15.6432	4.98463	0.31608	0.0048197
ENSRNOG00000043026	Rps15-ps2	ensembl	32.6762	61.5492	1.87468	0.00486376
ENSRNOG00000003546	Tnfrsf12a	ensembl	97.5688	162.468	1.66354	0.00491836
ENSRNOG00000050259	Rn5s	ensembl	2.72321	15.7393	5.51891	0.00499744
ENSRNOG00000011074	Calcb	ensembl	6.19221	0.672386	0.128021	0.00501035
ENSRNOG00000005365	Kcnip1	ensembl	413.388	254.577	0.613267	0.00501464
ENSRNOG00000032807	LOC100359505	havana	44.9376	100.968	2.21946	0.00502142
ENSRNOG00000028328	Tyw3	ensembl	228.843	140.886	0.613661	0.00504406
ENSRNOG00000056717	U2	ensembl	100.098	204.199	2.02528	0.00513887
ENSRNOG00000042471	RGD1560324	ensembl	0.912532	7.05549	6.82947	0.00515158
ENSRNOG00000058449	SNORA41	ensembl	9.87927	24.898	2.51089	0.00515448
ENSRNOG00000059913	AABR07001599.1	ensembl	0	5.37318	44.9867	0.00518751
ENSRNOG00000026793	Nt5dc3	ensembl	178.65	93.2778	0.522378	0.00518818
ENSRNOG00000006126	Nup88	ensembl	648.345	946.711	1.45377	0.00520153
ENSRNOG00000032973	Il13ra2	ensembl	322.596	569.007	1.75337	0.00520992
ENSRNOG00000052263	U1	ensembl	1.12064	7.50498	5.70384	0.00522174
ENSRNOG00000046644	Prelid3b	ensembl	528.244	358.119	0.6744	0.00526204
ENSRNOG00000054505	Olr803	ensembl	0	3.80551	32.117	0.00526365
ENSRNOG00000011557	S100a8	ensembl	2.16279	15.935	7.55447	0.00529483
ENSRNOG00000024437	Blcap	ensembl	632.742	435.894	0.686165	0.00530436
ENSRNOG00000027864	Ppia	ensembl_havana	1453.74	2111.43	1.44496	0.00537196
ENSRNOG00000061664	LOC502908	ensembl	5.34983	0	0.0221373	0.00540292
ENSRNOG00000029988	LOC103691423	ensembl	141.864	239.502	1.67399	0.00548895
ENSRNOG00000060012	Metazoa_SRP	ensembl	907.554	1650.14	1.81267	0.00551073
ENSRNOG00000003606	AABR07014550.1	ensembl	182.172	105.03	0.574753	0.0055157
ENSRNOG00000015370	Slc35g2	ensembl	751.404	509.496	0.674598	0.00561143
ENSRNOG00000049843	AABR07016950.1	ensembl	0.613858	11.4247	15.668	0.00561691
ENSRNOG00000033000	Oog3	ensembl	0	4.42302	37.2228	0.00564737
ENSRNOG00000011944	Snx10	ensembl	1486.87	1008.59	0.675021	0.00566325
ENSRNOG00000000010	Cbln1	ensembl	81.4802	26.803	0.329152	0.00567751
ENSRNOG00000054983	SCARNA11	ensembl	1.66436	9.69032	5.70937	0.005686
ENSRNOG00000015616	Rgs14	ensembl	56.3406	26.9619	0.478013	0.00573694
ENSRNOG00000031960	LOC102548369	ensembl	846.931	586.312	0.689775	0.00579806
ENSRNOG00000025987	LOC498236	ensembl	0.253393	4.59002	11.0185	0.00591127
ENSRNOG00000038197	Cd226	ensembl	65.1503	125.97	1.9303	0.00593111
ENSRNOG00000016700	Tcf21	ensembl	14.9734	34.4333	2.29312	0.00594425
ENSRNOG00000045797	Lep	ensembl	0	3.58144	29.7867	0.00596192
ENSRNOG00000000889	LOC304239	ensembl_havana	57.2785	29.444	0.510757	0.00599552
ENSRNOG00000021695	Hyal6	ensembl	0.360465	5.1491	12.1702	0.00601126
ENSRNOG00000012035	Rnf181	ensembl	628.624	1002.11	1.58743	0.00601549
ENSRNOG00000037188	LOC297568	ensembl	0.760179	12.8863	13.3884	0.00604745
ENSRNOG00000060559	snoU85	ensembl	5682.75	8895.9	1.56047	0.00605441
ENSRNOG00000007881	Mtmr14	ensembl	207.278	328.807	1.58151	0.00607831
ENSRNOG00000012410	S100a1	ensembl	413.515	653.602	1.5751	0.00610167
ENSRNOG00000026050	Epb41l4a	ensembl	255.035	406.212	1.58739	0.00610501
ENSRNOG00000056745	U6	ensembl	1.41096	8.34302	6.03875	0.00610638
ENSRNOG00000050370	Vom2r6	ensembl	0	3.80669	32.0875	0.00612153
ENSRNOG00000027990	Crip1	ensembl	49.4118	126.251	2.52626	0.006146
ENSRNOG00000031306	Zfp804b	ensembl	116.096	27.9072	0.240182	0.00616089
ENSRNOG00000019920	Doc2a	ensembl	66.5904	30.437	0.457506	0.00617862
ENSRNOG00000006119	Slc7a15	ensembl	0	3.97724	32.8374	0.00620664
ENSRNOG00000013240	Ptger4	ensembl	29.1577	10.9135	0.375248	0.00621656
ENSRNOG00000018937	Gstm2	ensembl	1209.43	1699.23	1.39824	0.00622372
ENSRNOG00000056985	U4	ensembl	0.329569	5.5449	13.03	0.00629393
ENSRNOG00000002487	Mbnl3	ensembl	0.720929	6.15903	8.19099	0.00634356
ENSRNOG00000002644	Utp18	ensembl	607.529	405.656	0.665579	0.00634794
ENSRNOG00000046955	Cbx6	ensembl	1641.77	1127.62	0.68409	0.00634866
ENSRNOG00000037307	Spata22	ensembl	1.31828	8.11776	5.9385	0.00636458
ENSRNOG00000029659	Spetex-2E	ensembl	6.91314	36.4105	5.14591	0.00640039
ENSRNOG00000018940	Slc28a1	ensembl	1.77143	8.95225	5.2785	0.00642127
ENSRNOG00000060944	SNORA81	ensembl	3.0075	11.1984	3.55944	0.00647405
ENSRNOG00000061083	U2	ensembl	68.9976	135.829	1.95053	0.00648807
ENSRNOG00000002848	Maoa	ensembl	3160.74	4363.9	1.37416	0.00650483
ENSRNOG00000046286	AABR07055878.1	ensembl	6.2066	17.4003	2.70756	0.0065078
ENSRNOG00000053113	Rn50_1_0435.2	havana	44.6351	95.5285	2.13921	0.00664264
ENSRNOG00000019908	Lamtor2	ensembl	634.193	941.536	1.47532	0.00664788
ENSRNOG00000013191	LOC100359763	ensembl	0.360465	5.03596	11.6753	0.00666148
ENSRNOG00000029377	Rpl38	ensembl	121.259	196.322	1.60881	0.0067182
ENSRNOG00000009884	Lgals1	ensembl	4697.97	6672.13	1.41382	0.00673726
ENSRNOG00000059081	AABR07026032.3	ensembl	68.9255	128.257	1.86072	0.00675448
ENSRNOG00000056437	SNORD113	ensembl	60.2035	29.8804	0.492919	0.00677076
ENSRNOG00000008615	Mal2	ensembl	956.85	659.158	0.68605	0.00677549
ENSRNOG00000033862	Olr836	ensembl	0	3.63868	30.0316	0.00685064
ENSRNOG00000023213	Dmrtb1	ensembl	7.84841	20.6503	2.52267	0.00698036
ENSRNOG00000056349	U2	ensembl	99.6114	187.211	1.86971	0.00701419
ENSRNOG00000010899	Bfsp2	ensembl	5.05506	14.8347	2.81029	0.00702502
ENSRNOG00000008798	Pipox	ensembl	49.5432	90.7451	1.81898	0.00705441
ENSRNOG00000053367	AABR07064257.1	ensembl	35.8732	71.5528	1.9766	0.00707878
ENSRNOG00000013506	Zfand6	ensembl	2699.86	1936.87	0.713794	0.00709758
ENSRNOG00000002005	Tmprss11f	ensembl	0	4.08683	34.4976	0.00712617
ENSRNOG00000036758	Iqck	ensembl	705.784	1056.15	1.48877	0.00715403
ENSRNOG00000055021	U6atac	ensembl	2.76014	10.749	4.01067	0.00717078
ENSRNOG00000051560	LOC100909586	ensembl	49.2181	93.045	1.86685	0.00717621
ENSRNOG00000011745	Psma1	ensembl	1145.53	1609.93	1.39824	0.00718268
ENSRNOG00000010053	Calcr	ensembl	563.044	809.66	1.43064	0.00719936
ENSRNOG00000055554	AC136867.2	ensembl	1.45021	7.21759	4.51339	0.00722823
ENSRNOG00000026864	LOC690784	ensembl	4.86949	14.78	3.03653	0.00731738
ENSRNOG00000051199	Fsip2	ensembl_havana	3.35961	20.8943	6.20539	0.00742473
ENSRNOG00000046717	AC130253.1	ensembl	15.089	38.1195	2.47545	0.00744576
ENSRNOG00000032473	Scn10a	ensembl	0.582962	7.16862	10.0003	0.007467
ENSRNOG00000027466	Cd27	ensembl	7.9411	20.6432	2.51452	0.00749237
ENSRNOG00000060522	Metazoa_SRP	ensembl	21.1226	44.3835	2.06749	0.00750813
ENSRNOG00000058222	AABR07013802.1	ensembl	50.7505	90.2257	1.75635	0.00754588
ENSRNOG00000061253	AABR07006038.2	ensembl	8.65367	21.5432	2.48071	0.00754649
ENSRNOG00000039591	Dydc2	ensembl	64.083	122.162	1.88363	0.00764624
ENSRNOG00000053388	AABR07046725.1	ensembl	0.613858	6.2161	8.61765	0.00765081
ENSRNOG00000048433	Tshz2	ensembl	548.725	340.066	0.616701	0.00772441
ENSRNOG00000021688	Ndufa13	ensembl	1944.88	1198.39	0.613818	0.00775461
ENSRNOG00000009433	Ccdc109b	ensembl	23.0336	45.0657	1.9575	0.00776569
ENSRNOG00000012550	Uqcrh	ensembl	5907.83	8248.1	1.38941	0.00777321
ENSRNOG00000018815	Plk1	ensembl	11.8813	26.7509	2.27887	0.00777937
ENSRNOG00000030291	Rn50_10_0698.6	havana	248.66	374.099	1.49394	0.00782274
ENSRNOG00000017365	Klhl35	ensembl	19.7832	7.78038	0.39765	0.00782468
ENSRNOG00000061419	AABR07008485.1	ensembl	9.03688	24.4176	2.63712	0.00788648
ENSRNOG00000009686	Aqp7	ensembl	0	3.74945	31.8093	0.00790931
ENSRNOG00000012199	Sox2	ensembl	2364.51	1694.2	0.713629	0.0079905
ENSRNOG00000014659	Ebpl	ensembl	313.055	464.333	1.47436	0.0080584
ENSRNOG00000021685	Cdk5r1	ensembl	502.467	344.113	0.682681	0.00807954
ENSRNOG00000049124	Mylk4	ensembl	28.9232	10.2887	0.361964	0.00814425
ENSRNOG00000054643	AABR07034183.1	ensembl	37.5171	68.6356	1.8104	0.00817646
ENSRNOG00000008915	Prima1	ensembl	153.099	89.642	0.583966	0.00819244
ENSRNOG00000040000	Cts8	ensembl	0	3.80788	32.0407	0.00823647
ENSRNOG00000020354	Mrpl23	ensembl	252.738	424.162	1.67131	0.00826853
ENSRNOG00000014828	Avpi1	ensembl	69.4915	118.266	1.68877	0.00829068
ENSRNOG00000012205	Lgsn	ensembl_havana	0	3.80196	32.1006	0.00829903
ENSRNOG00000025848	Sspo	ensembl	8.53009	20.3678	2.349	0.00835366
ENSRNOG00000020088	Klhl26	ensembl	768.663	547.089	0.708632	0.00842822
ENSRNOG00000003583	Smyd2	ensembl	751.997	487.551	0.644946	0.00844628
ENSRNOG00000056723	AABR07050498.1	ensembl	47.8131	98.5602	2.03656	0.00848017
ENSRNOG00000048016	Mff	ensembl	1512.15	1095.75	0.72153	0.00854509
ENSRNOG00000012659	Vamp5	ensembl	11.6754	31.0667	2.68475	0.00869285
ENSRNOG00000052439	SNORA73	ensembl	10.8499	26.9739	2.37844	0.00872184
ENSRNOG00000011949	Ndufb5	ensembl	774.425	1116.84	1.43386	0.00875976
ENSRNOG00000050191	Ccdc7	ensembl	0	5.71292	47.5373	0.00878013
ENSRNOG00000060691	U6	ensembl	1.99393	8.39316	4.25472	0.00881138
ENSRNOG00000020274	Taf5	ensembl	947.436	1360.87	1.42937	0.00881515
ENSRNOG00000059459	AABR07047256.1	ensembl	3.23	0	0.0358996	0.008817
ENSRNOG00000000715	Pou1f1	ensembl	11.3151	3.52656	0.316887	0.0088174
ENSRNOG00000027949	Rfx6	ensembl	0	3.58498	29.7858	0.00881883
ENSRNOG00000009241	RGD1560291	ensembl	0	3.46814	29.3428	0.00891265
ENSRNOG00000018007	Gtf2h5	ensembl	717.832	1063.55	1.47471	0.00892125
ENSRNOG00000048320	Ndufa11	ensembl	510.817	790.689	1.53822	0.00892556
ENSRNOG00000017759	Ucn3	ensembl	8.45782	1.34241	0.17583	0.00893989
ENSRNOG00000008919	Arpp21	ensembl	718.003	467.183	0.647281	0.00902518
ENSRNOG00000042903	Cox7a2l2	ensembl	48.8186	93.2773	1.88373	0.00911461
ENSRNOG00000000466	Hsd17b8	ensembl_havana	289.711	168.971	0.580663	0.00911617
ENSRNOG00000004756	Syt2	ensembl	111.109	19.3482	0.174365	0.00911953
ENSRNOG00000031067	Si	ensembl	1.273	10.8667	7.99293	0.00919683
ENSRNOG00000057194	Tars2	ensembl	1428.12	978.881	0.681686	0.00920462
ENSRNOG00000032857	Klk1c9	ensembl	3.92606	12.5372	3.24906	0.00920626
ENSRNOG00000008196	Parp12	ensembl	353.368	570.97	1.60965	0.0092385
ENSRNOG00000017969	Olfm3	ensembl	1125.5	720.502	0.636866	0.00939255
ENSRNOG00000057161	AABR07027407.1	ensembl	149.339	244.79	1.6279	0.00944389
ENSRNOG00000036984	Slco1a1	ensembl	0.360465	5.82504	13.5409	0.00958671
ENSRNOG00000060046	SNORA5	ensembl	0	3.24761	26.977	0.00960596
ENSRNOG00000016641	Actl7a	ensembl	7.11078	18.9683	2.62359	0.00961765
ENSRNOG00000042158	Ceacam12	ensembl	0	4.08801	34.4315	0.00963252
ENSRNOG00000021480	Rad9b	ensembl	57.0269	103.057	1.78328	0.00963603
ENSRNOG00000060489	AABR07015639.1	ensembl	27.2442	55.5388	2.02822	0.00971894
ENSRNOG00000013792	Slco6c1	ensembl	0.690034	6.72284	8.97121	0.00976147
ENSRNOG00000041624	AABR07004833.1	ensembl	4.08677	0	0.0292593	0.00977178
ENSRNOG00000035620	Mir22	ensembl	30.3037	63.9784	2.07303	0.00986487
ENSRNOG00000000172	Sqrdl	ensembl	605.419	897.939	1.47718	0.0098966
ENSRNOG00000054456	7SK	ensembl	151.787	283.992	1.85809	0.00990933
ENSRNOG00000021225	Oxt	ensembl	3452.25	219.56	0.0632994	0.0100299
ENSRNOG00000057406	AABR07048321.1	ensembl	2.87556	12.5455	4.28927	0.0100301
ENSRNOG00000028711	Dgat1	ensembl	103.677	163.735	1.5724	0.0100374
ENSRNOG00000002196	Ociad2	ensembl	219.78	109.761	0.496189	0.0100859
ENSRNOG00000061829	7SK	ensembl	192.705	345.326	1.78051	0.0101989
ENSRNOG00000000081	Antxr2	ensembl	280.968	462.831	1.64454	0.0102356
ENSRNOG00000009409	Fbxo2	ensembl	1545.32	2136.04	1.37618	0.0102465
ENSRNOG00000016227	Glrx3	ensembl	1676.15	1186.47	0.704909	0.0102819
ENSRNOG00000000064	Atp5i	ensembl	2161.72	1523.79	0.702018	0.0102821
ENSRNOG00000013179	Tinagl1	ensembl	187.392	302.451	1.60484	0.0103465
ENSRNOG00000007504	Actr10	ensembl	1189.82	1665.16	1.3936	0.0103483
ENSRNOG00000052393	Bscl2	ensembl	179.145	269.415	1.49827	0.0105374
ENSRNOG00000011825	Ndufb3	ensembl	1087.31	1526.51	1.39739	0.0105915
ENSRNOG00000058141	AABR07007391.1	ensembl	4.76242	13.6605	2.83621	0.0106108
ENSRNOG00000036622	Glyatl1	ensembl	1.957	8.61842	3.96589	0.0106939
ENSRNOG00000057291	AABR07019088.1	ensembl	20.5247	44.6327	2.1739	0.0107231
ENSRNOG00000015218	Nsmce1	ensembl	299	469.276	1.56477	0.0107414
ENSRNOG00000011952	Samm50	ensembl	444.385	305.961	0.686075	0.0107627
ENSRNOG00000017412	AABR07001512.1	ensembl	649.389	451.319	0.691848	0.0108031
ENSRNOG00000048853	Slc25a41	ensembl	2.30911	10.0169	4.37457	0.0108562
ENSRNOG00000030520	Sarnp	ensembl	2314.82	3146.42	1.35345	0.0109292
ENSRNOG00000055707	AABR07043133.1	ensembl	4.56246	0	0.0269243	0.0109502
ENSRNOG00000061706	AC110851.1	ensembl	0	4.35987	36.8686	0.0111144
ENSRNOG00000018729	Rad9a	ensembl	214.178	141.544	0.656909	0.0111353
ENSRNOG00000048343	Crtap	ensembl	27.4704	11.9805	0.440104	0.0111505
ENSRNOG00000060052	LOC102556253	ensembl	5.16816	16.1269	3.12554	0.0112363
ENSRNOG00000032959	Adh7	ensembl	6.43513	1.39965	0.231827	0.0112644
ENSRNOG00000005151	Dync2li1	ensembl	393.652	639.131	1.61545	0.0112767
ENSRNOG00000060051	AABR07049038.1	ensembl	73.5611	44.3777	0.602131	0.0113031
ENSRNOG00000045964	AABR07026892.1	ensembl	3.1991	0	0.0361389	0.011316
ENSRNOG00000051302	Krt34	ensembl_havana	0	3.41208	29.0713	0.0113196
ENSRNOG00000051581	AC121415.2	ensembl	0	3.41208	29.0712	0.0113245
ENSRNOG00000014629	Lmo1	ensembl	66.1907	107.135	1.61227	0.0113887
ENSRNOG00000012557	Lgals5	ensembl	24.9181	50.8611	2.0572	0.0114495
ENSRNOG00000002975	RGD1563606	ensembl	45.9337	80.6501	1.74707	0.0115117
ENSRNOG00000019578	Rps16	ensembl	219.275	356.672	1.61636	0.011534
ENSRNOG00000048656	AABR07007853.1	ensembl	97.6634	57.6568	0.584581	0.0115393
ENSRNOG00000053813	Nkap	ensembl_havana	1500.92	1045.15	0.693398	0.0115697
ENSRNOG00000054053	LOC102554799	ensembl	0.506786	4.47671	6.44472	0.0115865
ENSRNOG00000022511	tGap1	ensembl	0.329569	7.45112	17.2731	0.0116135
ENSRNOG00000026616	Ndufb2	ensembl	745.042	1031.88	1.37813	0.011652
ENSRNOG00000028185	Tstd3	ensembl	1187.49	873.815	0.732566	0.0116871
ENSRNOG00000056748	AC229945.1	ensembl	28.8467	54.4136	1.87807	0.01177
ENSRNOG00000059300	SNORA44	ensembl	1.22772	6.71811	5.03363	0.0117704
ENSRNOG00000028636	Xkr5	ensembl	12.6357	27.2539	2.09723	0.0117848
ENSRNOG00000012348	Exosc4	ensembl	254.418	373.601	1.45981	0.0117859
ENSRNOG00000046636	RGD1562378	ensembl	43.6286	91.6431	2.10099	0.0117936
ENSRNOG00000040040	Ndufaf6	ensembl	77.985	138.64	1.77604	0.0118764
ENSRNOG00000030956	RGD1561114	ensembl	1.08139	8.17484	7.55987	0.0118934
ENSRNOG00000026527	Snx32	ensembl	148.642	242.13	1.617	0.011928
ENSRNOG00000009431	Tbc1d4	ensembl	214.103	143.987	0.669671	0.0119619
ENSRNOG00000005867	Tra2b	ensembl	0	4.02722	34.1348	0.0119864
ENSRNOG00000056141	Matn3	ensembl	6.85738	17.4682	2.5337	0.0120305
ENSRNOG00000058340	Krt79	ensembl_havana	1.08139	7.95313	7.34941	0.0120511
ENSRNOG00000015843	Itfg1	ensembl	7514.59	5619.19	0.744075	0.0120842
ENSRNOG00000037172	RGD1564138	ensembl	45.4022	19.9039	0.442603	0.0121359
ENSRNOG00000019120	Hmgcs2	ensembl	1663.65	2331.6	1.39482	0.0121413
ENSRNOG00000003977	Dusp1	ensembl	104.373	162.557	1.55072	0.0122391
ENSRNOG00000018685	AABR07028237.1	ensembl	1533.54	1106.65	0.718546	0.0123121
ENSRNOG00000017749	Nkg7	ensembl	2.60778	9.74165	3.7023	0.0123435
ENSRNOG00000001916	Tmprss15	ensembl	3.25486	13.4301	3.78326	0.0123557
ENSRNOG00000021752	AABR07027496.1	ensembl	15.6469	6.38073	0.411867	0.0123644
ENSRNOG00000059513	LOC102547412	ensembl	0	3.75182	31.7023	0.0123728
ENSRNOG00000048611	Olr409	ensembl	0	4.02604	34.1416	0.0124322
ENSRNOG00000011799	Ccdc159	ensembl	45.7709	81.9604	1.77927	0.0124398
ENSRNOG00000018958	Mt3	ensembl	1289.92	2361.56	1.82494	0.0124445
ENSRNOG00000032812	LOC498308	ensembl	3.12292	0	0.0366953	0.0124702
ENSRNOG00000052787	Rsl24d1	ensembl	1838.22	2582.76	1.39781	0.0124874
ENSRNOG00000026091	Slc10a4	ensembl	46.0958	20.041	0.434402	0.0125077
ENSRNOG00000013991	Creg2	ensembl	31.411	12.8724	0.408651	0.0125206
ENSRNOG00000005920	AABR07054266.1	ensembl	1768.53	1303.64	0.733566	0.0125365
ENSRNOG00000032825	Rpl30	ensembl	2334.75	3276.72	1.39676	0.0125389
ENSRNOG00000049509	Olr614	ensembl	0	3.19037	26.7578	0.0126618
ENSRNOG00000001611	Rpl24	ensembl	4436.38	3078.6	0.690471	0.0126735
ENSRNOG00000030979	AABR07060190.1	ensembl	1.37404	6.66087	4.1808	0.0127816
ENSRNOG00000034106	LOC679748	ensembl	29.6525	60.5236	2.02639	0.0127833
ENSRNOG00000008992	Grik3	ensembl	188.321	100.858	0.534024	0.0127998
ENSRNOG00000000969	Cyp3a18	ensembl_havana	0	5.15501	42.8092	0.0128311
ENSRNOG00000017890	Crhbp	ensembl	11.113	24.6238	2.23647	0.0129236
ENSRNOG00000025012	Chat	ensembl	139.459	66.0222	0.473223	0.0129882
ENSRNOG00000013503	Cdh24	ensembl	41.3252	20.7065	0.501368	0.0131209
ENSRNOG00000036663	Foxk2	ensembl	1177.63	858.946	0.726377	0.0132551
ENSRNOG00000008225	AABR07064349.1	ensembl	28.3005	80.9527	2.84293	0.0132642
ENSRNOG00000021355	Car6	ensembl	153.926	255.394	1.64856	0.0133767
ENSRNOG00000061677	U6	ensembl	60.1322	34.1902	0.571008	0.0133863
ENSRNOG00000028557	Hibch	ensembl	926.147	1299.95	1.39757	0.0134051
ENSRNOG00000049937	Pdxk	ensembl	278.694	185.628	0.663308	0.0134201
ENSRNOG00000038825	Fabp12	ensembl	0	3.13431	26.5477	0.0134441
ENSRNOG00000017548	Fam53a	ensembl	150.202	227.462	1.5081	0.0134478
ENSRNOG00000015807	Pyroxd2	ensembl	112.122	181.985	1.61252	0.0134918
ENSRNOG00000027960	Rn50_6_1181.1	havana	1.67271	8.79386	4.60068	0.0135089
ENSRNOG00000030276	Ctsm	ensembl	0.506786	4.25619	6.06342	0.0135671
ENSRNOG00000054923	U6	ensembl	2.21642	11.4272	4.99434	0.0136334
ENSRNOG00000018239	Dhrs4	ensembl	1199.74	1669.33	1.38458	0.0136417
ENSRNOG00000011803	Lrfn2	ensembl	37.4221	19.1947	0.510692	0.013698
ENSRNOG00000010912	Mrps25	ensembl	1281.14	1825.71	1.41865	0.0137146
ENSRNOG00000060486	Ptges3l1	ensembl	270.63	172.677	0.634636	0.0137442
ENSRNOG00000034289	Ndufb4l1	ensembl	0	4.02959	34.0776	0.0137512
ENSRNOG00000000991	Arpc1b	ensembl_havana	269.321	396.444	1.46599	0.0138016
ENSRNOG00000047863	AABR07055356.1	ensembl	0.582962	4.87015	6.81795	0.0138305
ENSRNOG00000052714	SNORA63	ensembl	14.036	33.4854	2.39298	0.0138404
ENSRNOG00000056781	Cfap221	ensembl	64.5308	110.967	1.70634	0.0138438
ENSRNOG00000003714	Clk4	ensembl	2361.18	3411.25	1.43663	0.0138687
ENSRNOG00000058999	AABR07053470.1	ensembl	2.86118	9.18003	3.17609	0.013892
ENSRNOG00000045742	Cyb5d1	ensembl	169.591	252.163	1.47978	0.0139108
ENSRNOG00000050034	AABR07042616.1	ensembl	2.42454	11.1303	4.42243	0.0139194
ENSRNOG00000008592	Barx2	ensembl	29.465	68.0978	2.30153	0.0139432
ENSRNOG00000010079	Car3	ensembl	1011.36	1416.77	1.39379	0.0139472
ENSRNOG00000058006	Sncg	ensembl	459.395	649.681	1.40734	0.0139884
ENSRNOG00000030104	Vom2r46	ensembl	7.20134	20.4976	2.81395	0.0141023
ENSRNOG00000018271	Scamp4	ensembl	41.3641	80.5278	1.95973	0.0141361
ENSRNOG00000002024	Epha5	ensembl	1695.71	1037.21	0.608723	0.0141745
ENSRNOG00000001288	Gpr146	ensembl	170.752	109.933	0.64224	0.0141801
ENSRNOG00000029050	AABR07047221.1	ensembl	2.21642	9.29317	4.11287	0.0142514
ENSRNOG00000051770	Cyp2w1	ensembl	2.27821	8.95951	3.8842	0.0143789
ENSRNOG00000018901	Rab14	ensembl	1340.05	1817.74	1.3502	0.0144595
ENSRNOG00000047568	LOC686837	ensembl	0	4.08919	34.352	0.0144713
ENSRNOG00000009592	Cyb5r3	ensembl	1347.74	1001.22	0.739384	0.0144756
ENSRNOG00000051840	U6	ensembl	1.45021	6.26862	3.90244	0.0146185
ENSRNOG00000053827	AABR07037058.1	ensembl	56.3239	32.0084	0.569408	0.0146205
ENSRNOG00000030145	RGD1561667	ensembl	2.69834	23.2486	8.40791	0.0146324
ENSRNOG00000057382	U1	ensembl	35.0006	66.386	1.85898	0.0146608
ENSRNOG00000056222	AABR07021636.1	ensembl	4.35667	13.1466	2.96239	0.0146661
ENSRNOG00000048958	Rpl37-ps1	ensembl	125.574	190.917	1.50903	0.0146837
ENSRNOG00000008551	Rps7	ensembl	482.348	686.766	1.41624	0.0147229
ENSRNOG00000051100	Rn50_13_0829.4	havana	1995.56	1350.43	0.673368	0.0147245
ENSRNOG00000046299	Atp5f1	ensembl_havana	1326.29	1874.01	1.40604	0.0147429
ENSRNOG00000047784	AC141993.1	ensembl	1.41096	6.94218	5.05385	0.0148153
ENSRNOG00000055451	Gcnt4	ensembl	58.5171	32.2863	0.554547	0.0148642
ENSRNOG00000032605	Rpl32	ensembl	2033.04	2742.13	1.34254	0.0149241
ENSRNOG00000003198	RGD1305733	ensembl	2100.18	1471.93	0.697767	0.0149864
ENSRNOG00000031378	AABR07009715.1	ensembl	598.397	432.981	0.720915	0.0150993
ENSRNOG00000015682	Kel	ensembl	7.75553	18.0727	2.32681	0.0151091
ENSRNOG00000052563	snoU89	ensembl	251.812	419.074	1.65725	0.0151383
ENSRNOG00000025220	Slc6a16	ensembl	0.253393	4.47908	10.9269	0.0152123
ENSRNOG00000002511	Flt4	ensembl	28.5541	13.3825	0.470662	0.0153015
ENSRNOG00000058607	SNORA17	ensembl	0.360465	4.47908	10.5695	0.0153121
ENSRNOG00000009821	Slitrk3	ensembl	307.915	198.009	0.640842	0.0153449
ENSRNOG00000013736	C9	ensembl	1.66436	13.4394	7.83608	0.0153548
ENSRNOG00000052869	Ccpg1os	ensembl	219.05	317.046	1.44046	0.0153602
ENSRNOG00000017438	Gfra1	ensembl	484.67	314.191	0.646677	0.0153733
ENSRNOG00000013768	Defb1	ensembl	300.985	431.671	1.42889	0.0154713
ENSRNOG00000006505	Borcs5	ensembl	55.5409	91.7308	1.64872	0.0154887
ENSRNOG00000014179	Rps2	ensembl	382.533	545.014	1.4196	0.0155038
ENSRNOG00000015741	Slc2a13	ensembl	2436.03	1676.15	0.684532	0.0155052
ENSRNOG00000027052	AABR07073381.1	ensembl	1.16592	5.53899	4.24532	0.0155848
ENSRNOG00000017595	Rsu1	ensembl	223.409	382.526	1.70269	0.0157307
ENSRNOG00000059725	AC111734.2	ensembl	0.988708	7.16997	6.74138	0.0157393
ENSRNOG00000056185	U4	ensembl	0.506786	5.21005	7.38168	0.0158023
ENSRNOG00000059554	AABR07058907.2	ensembl	3.07764	0	0.0372115	0.0158058
ENSRNOG00000058693	AABR07050061.1	ensembl	3.07764	0	0.0372117	0.0158114
ENSRNOG00000022163	LOC102555023	ensembl	3.07764	0	0.0372119	0.0158162
ENSRNOG00000058283	SNORA62	ensembl	53.2918	29.4835	0.553607	0.0158213
ENSRNOG00000007830	Apold1	ensembl	192.546	117.23	0.606117	0.0160156
ENSRNOG00000003289	Lap3	ensembl	1790.73	2511.96	1.39646	0.0162018
ENSRNOG00000059922	AABR07019442.2	ensembl	0.943427	6.83243	6.63253	0.0162455
ENSRNOG00000043512	LOC691015	ensembl	6.6205	16.5693	2.50166	0.0162528
ENSRNOG00000047872	AABR07042385.1	ensembl	6.10556	14.7763	2.37086	0.0162581
ENSRNOG00000029964	Tmprss11g	ensembl	0	4.03077	34.029	0.0162768
ENSRNOG00000048197	Fam154a	ensembl_havana	0	3.41562	28.9683	0.0163028
ENSRNOG00000040215	Sult1c2	ensembl_havana	2.101	14.0058	6.64865	0.0163345
ENSRNOG00000014294	Ptpn6	ensembl	202.063	302.814	1.48683	0.016479
ENSRNOG00000039571	Glod5	ensembl	49.186	106.922	2.1632	0.016485
ENSRNOG00000047686	AABR07049887.1	ensembl	15.6613	4.81898	0.30403	0.0165347
ENSRNOG00000004372	Cbln4	ensembl	260.199	176.158	0.674129	0.0165439
ENSRNOG00000003829	Ap3s1	ensembl	1189.73	886.647	0.741523	0.0165536
ENSRNOG00000051579	AABR07070129.1	ensembl	0	3.69221	31.3833	0.016568
ENSRNOG00000010824	Parp8	ensembl	369.213	532.6	1.43382	0.0165954
ENSRNOG00000022699	Rn50_10_0644.1	havana	56.5179	31.4589	0.554274	0.0166126
ENSRNOG00000018211	Urod	ensembl	687.289	971.223	1.40667	0.0166377
ENSRNOG00000016245	Neto2	ensembl	312.318	206.811	0.659389	0.0166405
ENSRNOG00000054955	Adgra1	ensembl	328.857	218.129	0.659304	0.0166815
ENSRNOG00000050110	LOC100911790	ensembl	0	3.07707	26.3028	0.0167575
ENSRNOG00000010390	Hmbs	ensembl	111.641	167.304	1.4914	0.0168438
ENSRNOG00000004646	Tpo	ensembl	1.22772	6.54875	4.96697	0.0168448
ENSRNOG00000020980	AABR07006278.1	ensembl	3.71192	11.4667	3.03557	0.016858
ENSRNOG00000045655	LOC103690005	ensembl	864.939	1280.5	1.47473	0.0169015
ENSRNOG00000060414	AABR07052730.3	ensembl	3.28131	11.636	3.55621	0.0169185
ENSRNOG00000057821	AABR07015165.1	ensembl	577.577	411.557	0.709332	0.01692
ENSRNOG00000047321	Hba-a2	ensembl	6453.23	10930.3	1.68955	0.0169275
ENSRNOG00000017194	Prdx1	ensembl	564.985	840.602	1.48095	0.0169679
ENSRNOG00000006857	Ndnf	ensembl	637.191	325.051	0.506982	0.0169805
ENSRNOG00000053154	AABR07007980.1	ensembl	3.59882	0	0.0320868	0.0170027
ENSRNOG00000032203	AABR07049040.1	ensembl	2.94571	0	0.0392928	0.017007
ENSRNOG00000054801	AABR07057997.1	ensembl	10.0851	22.8988	2.30118	0.0170595
ENSRNOG00000058251	AABR07069728.1	ensembl	0	4.36814	36.6832	0.0170721
ENSRNOG00000032745	Slc17a3	ensembl	0	4.36814	36.6831	0.0170806
ENSRNOG00000056565	AABR07059002.1	ensembl	40.4696	20.9949	0.511248	0.0171805
ENSRNOG00000051996	AABR07004703.1	ensembl	12.5014	4.5912	0.373176	0.0171999
ENSRNOG00000027630	Casc1	ensembl	1063.57	1477.18	1.38203	0.0172972
ENSRNOG00000036690	Ppp1r27	ensembl	11.3664	3.80551	0.348606	0.0175447
ENSRNOG00000061136	U11	ensembl	2.02482	8.90581	4.40265	0.0175601
ENSRNOG00000023020	Fdx1l	ensembl	449.562	669.574	1.48217	0.0175656
ENSRNOG00000004124	Grpr	ensembl	20.1676	3.19155	0.162163	0.017593
ENSRNOG00000060539	SNORA81	ensembl	10.5965	27.7787	2.51731	0.0176886
ENSRNOG00000012314	Slirp	ensembl	235.541	364.251	1.54358	0.0177066
ENSRNOG00000008591	Colec10	ensembl	0.329569	7.05769	16.3691	0.01773
ENSRNOG00000047250	Gmfb	ensembl	1163.29	859.231	0.734977	0.0177457
ENSRNOG00000006217	Wiz	ensembl	105.832	64.2531	0.606824	0.01789
ENSRNOG00000052990	Cers5	ensembl	467.896	689.159	1.46697	0.0179188
ENSRNOG00000015660	Pex3	ensembl	322.649	452.996	1.39619	0.0179492
ENSRNOG00000046319	Vom2r3	ensembl	0	4.48263	37.3588	0.0180529
ENSRNOG00000014205	Klf2	ensembl	27.2667	47.6789	1.75233	0.0180831
ENSRNOG00000001083	Kdelr2	ensembl	1761.42	1278.67	0.72224	0.0181263
ENSRNOG00000002394	Tpr	ensembl	10482.9	7901.37	0.750397	0.0181565
ENSRNOG00000011678	Wbp4	ensembl	460.01	328.209	0.709933	0.0181668
ENSRNOG00000004535	Kcng3	ensembl	10.9237	3.91763	0.359263	0.0181736
ENSRNOG00000000768	Ubd	ensembl_havana	14.2789	5.03951	0.357499	0.0182256
ENSRNOG00000054158	AABR07035835.1	ensembl	0	4.46962	37.5341	0.0182563
ENSRNOG00000056609	U1	ensembl	29.2507	51.377	1.75149	0.0182732
ENSRNOG00000048174	Uqcrq	ensembl	4351.9	3016.69	0.689645	0.0182821
ENSRNOG00000003401	Gm8225	ensembl	29.891	54.4743	1.82296	0.0184194
ENSRNOG00000009888	Timm8b	ensembl	56.3843	100.846	1.76552	0.0184515
ENSRNOG00000058136	Vom1r90	ensembl	26.7432	50.6568	1.90917	0.0185746
ENSRNOG00000042915	Mxra7	ensembl	86.9993	52.3869	0.603026	0.0187541
ENSRNOG00000061379	C7	ensembl	1423.47	2159.03	1.50999	0.0187888
ENSRNOG00000034180	LOC100360781	ensembl	2188.37	3152.18	1.43241	0.0188601
ENSRNOG00000053697	U6	ensembl	1.08139	8.17973	7.45201	0.0188906
ENSRNOG00000023140	Pnldc1	ensembl_havana	16.3474	32.5857	1.97018	0.0189117
ENSRNOG00000028623	Agpat5	ensembl	1430.58	1913.69	1.33193	0.0189893
ENSRNOG00000025327	Tert	ensembl	15.1566	30.684	2.02045	0.019004
ENSRNOG00000029597	LOC100912866	ensembl	4.07238	12.3596	3.02037	0.0190268
ENSRNOG00000049530	AABR07012054.1	ensembl	324.317	218.926	0.672565	0.0190345
ENSRNOG00000011990	AC110488.1	ensembl	4.41011	14.7286	3.39525	0.0190418
ENSRNOG00000054130	uc_338	ensembl	3.81063	0	0.0321104	0.0190446
ENSRNOG00000039876	Hnrnpa0	ensembl	96.9421	55.8302	0.576658	0.0190902
ENSRNOG00000040195	Sult1c2a	ensembl_havana	0.360465	5.71055	13.228	0.0192072
ENSRNOG00000057490	SCARNA21	ensembl	194.473	328.988	1.68797	0.0192145
ENSRNOG00000061217	AABR07054887.1	ensembl	2.17114	7.44419	3.29784	0.0192159
ENSRNOG00000056612	Unc13c	ensembl	352.169	187.941	0.530899	0.0192838
ENSRNOG00000028965	LOC685048	ensembl	0.690034	5.15028	7.05096	0.0193162
ENSRNOG00000014119	Farsb	ensembl	825.041	1130.66	1.36401	0.0193238
ENSRNOG00000055583	Ttyh3	ensembl	506.48	357.513	0.70349	0.0193958
ENSRNOG00000018420	Slc22a7	ensembl	12.6666	25.976	1.98392	0.0194625
ENSRNOG00000050532	rno-mir-6319-1	ensembl	5.3786	0.784505	0.149525	0.0195011
ENSRNOG00000060263	SNORA71	ensembl	0.253393	4.36949	10.4638	0.0195058
ENSRNOG00000042971	LOC363337	ensembl	27.2344	56.6509	2.05205	0.0195562
ENSRNOG00000003504	Rnaseh2a	ensembl	603.74	434.953	0.716698	0.0196956
ENSRNOG00000054067	AABR07005837.1	ensembl	0	2.9126	24.2163	0.019713
ENSRNOG00000056678	Nckap5l	ensembl	51.2872	27.2454	0.535999	0.0197753
ENSRNOG00000004994	Agr3	ensembl	2.76246	10.1922	3.35601	0.0198056
ENSRNOG00000022255	Tmprss11e	ensembl	0	3.58617	29.8247	0.0198122
ENSRNOG00000029184	Epha6	ensembl	287.575	171.734	0.594563	0.0198815
ENSRNOG00000010342	Zfand1	ensembl	273.456	400.768	1.45709	0.0199122
ENSRNOG00000028449	LOC100360449	ensembl	595.109	828.76	1.38622	0.0199451
ENSRNOG00000058109	AABR07008152.1	ensembl	0	3.57907	29.9125	0.0199662
ENSRNOG00000037566	RGD1560398	ensembl	171.139	113.985	0.664354	0.0200488
ENSRNOG00000020606	B3gnt8	ensembl	8.83925	2.4631	0.283136	0.0201269
ENSRNOG00000024071	Mtcp1	ensembl	7.91624	2.18415	0.27744	0.0202165
ENSRNOG00000001313	Gnaz	ensembl	669.928	450.447	0.669245	0.0202802
ENSRNOG00000053476	AABR07062350.1	ensembl	1.63346	6.6585	4.03133	0.0202967
ENSRNOG00000015751	Cyp4f18	ensembl	1.52639	6.93509	4.27374	0.0203551
ENSRNOG00000027049	Atp5j2	ensembl_havana	1278.08	1994.37	1.55328	0.0203601
ENSRNOG00000043137	RGD1560608	ensembl	21.0004	42.121	2.01567	0.0204149
ENSRNOG00000060825	Ccm2	ensembl	264.22	173.242	0.652764	0.0204484
ENSRNOG00000048470	Pomp	ensembl	450.581	772.136	1.706	0.0204669
ENSRNOG00000042627	Camta1	ensembl	39.3666	66.3372	1.68086	0.0204832
ENSRNOG00000011191	Vom2r10	ensembl	0	4.70552	39.3217	0.0205127
ENSRNOG00000003706	Ufc1	ensembl	1037.02	769.612	0.738645	0.020538
ENSRNOG00000048277	Srrt	ensembl	680.702	505.764	0.739489	0.0205601
ENSRNOG00000058845	AABR07004033.1	ensembl	7.00603	1.39728	0.208458	0.0205848
ENSRNOG00000029945	Cuzd1	ensembl	3.50593	10.3568	2.92769	0.0205852
ENSRNOG00000056940	Cited2	ensembl	469.501	328.544	0.697634	0.0205877
ENSRNOG00000030434	Rs1	ensembl	29.2075	57.497	1.95371	0.0206458
ENSRNOG00000010087	Zfp143	ensembl	390.523	559.873	1.42704	0.0207535
ENSRNOG00000048561	Hprt1	ensembl	1107.67	808.424	0.726675	0.0207586
ENSRNOG00000057748	SNORA29	ensembl	11.5211	3.80196	0.338243	0.0207589
ENSRNOG00000015878	Pif1	ensembl	1.2421	6.94116	5.10569	0.0207705
ENSRNOG00000008837	Ass1	ensembl	256.207	380.635	1.47729	0.0208907
ENSRNOG00000059572	LOC100909510	ensembl	185.657	274.975	1.47266	0.0209159
ENSRNOG00000042524	Milr1	ensembl	1.37404	6.43561	4.0207	0.0209794
ENSRNOG00000054624	AC096792.1	ensembl	0.988708	8.79235	8.2577	0.0210599
ENSRNOG00000042233	Rpl41	ensembl	3363.11	5101.77	1.51129	0.0210602
ENSRNOG00000019394	Mpv17l2	ensembl	26.7418	52.584	1.93741	0.0211402
ENSRNOG00000022368	Ddx49	ensembl	515.336	373.467	0.721492	0.0211447
ENSRNOG00000058118	AABR07065889.2	ensembl	6.59138	0	0.0182925	0.0211475
ENSRNOG00000032137	Foxb2	ensembl	6.59138	0	0.0182925	0.0211589
ENSRNOG00000058322	AABR07056415.2	ensembl	0	4.76276	39.6771	0.0211698
ENSRNOG00000005963	Rab2a	ensembl	3660.11	2740.6	0.745864	0.0212381
ENSRNOG00000050982	Rn60_14_0082.1	havana	4.20432	14.7884	3.35594	0.0213471
ENSRNOG00000011541	Cygb	ensembl	334.116	225.354	0.672477	0.0213594
ENSRNOG00000028648	Olig1	ensembl	506.461	364.318	0.71633	0.0214138
ENSRNOG00000022227	AABR07002564.1	ensembl	286.1	188.761	0.657016	0.0214335
ENSRNOG00000059057	Fam35a	ensembl	567.984	419.882	0.735444	0.0214927
ENSRNOG00000014163	Zfp536	ensembl	556.559	401.463	0.718228	0.0215065
ENSRNOG00000051641	U6atac	ensembl	0.329569	5.7536	13.538	0.0216038
ENSRNOG00000054350	SNORA17	ensembl	0	2.79811	23.763	0.0216199
ENSRNOG00000004616	Npm1	ensembl	3710.57	2783.74	0.746848	0.0216681
ENSRNOG00000057081	AABR07068593.1	ensembl	0.912532	8.40515	8.05908	0.0217035
ENSRNOG00000004457	RGD1560617	ensembl	838.261	594.439	0.706958	0.0217355
ENSRNOG00000052376	Bend6	ensembl	1330.27	880.262	0.658362	0.0217749
ENSRNOG00000048909	Olr395	ensembl	0	3.07943	26.231	0.0217971
ENSRNOG00000033775	LOC681871	ensembl	0	3.07943	26.2309	0.0218043
ENSRNOG00000054085	AABR07033829.1	ensembl	174.388	282.845	1.60898	0.0218483
ENSRNOG00000031935	AABR07052587.1	ensembl	248.703	160.664	0.644053	0.0218584
ENSRNOG00000055145	Rn50_3_0729.2	havana	6.0972	1.39847	0.249941	0.0218827
ENSRNOG00000010098	Plek2	ensembl	19.1695	35.7566	1.85217	0.0219818
ENSRNOG00000003809	Sat1	ensembl	2760.98	3718.7	1.34136	0.0220189
ENSRNOG00000058596	U6	ensembl	4.64931	0.728445	0.169251	0.0220371
ENSRNOG00000055590	U1	ensembl	0.690034	5.49019	7.28438	0.0220393
ENSRNOG00000024986	Mmrn1	ensembl	55.341	90.1953	1.63141	0.0220532
ENSRNOG00000008868	Dusp19	ensembl	110.65	164.05	1.47345	0.0220817
ENSRNOG00000018551	Olr63	ensembl	7.2571	1.56901	0.21067	0.0220821
ENSRNOG00000005368	Ppp3r2	ensembl	0.943427	5.88007	5.58865	0.0221377
ENSRNOG00000029627	LOC100362684	ensembl	248.22	353.009	1.41201	0.0221509
ENSRNOG00000038355	Crygs	ensembl	211.696	371.326	1.74524	0.0222038
ENSRNOG00000019022	Fam89a	ensembl	22.7495	41.5749	1.81389	0.0222123
ENSRNOG00000051850	SCARNA2	ensembl	794.813	1132.58	1.41893	0.0222317
ENSRNOG00000051924	AABR07017266.1	ensembl	3.22397	0	0.0353695	0.0222545
ENSRNOG00000014025	Rasgrf1	ensembl	3562.5	2336.01	0.651753	0.0223001
ENSRNOG00000045968	RGD1561310	ensembl	5.48335	18.4876	3.34415	0.0223132
ENSRNOG00000011413	Podn	ensembl	5520.89	7259.72	1.30908	0.0223279
ENSRNOG00000012742	Irx2	ensembl	35.6079	16.6254	0.465985	0.0223548
ENSRNOG00000021866	Bola3	ensembl	558.695	403.465	0.719264	0.0223679
ENSRNOG00000016312	Catsper4	ensembl	0.329569	4.08328	9.79356	0.0224196
ENSRNOG00000036825	Spt1	ensembl	0	3.13667	26.4819	0.0224439
ENSRNOG00000052568	U2	ensembl	28.8963	54.5838	1.88569	0.0224859
ENSRNOG00000062021	Rn60_17_0764.3	havana	39.4438	20.2082	0.503842	0.0225107
ENSRNOG00000036814	Atp6v0a1	ensembl	3368.14	2535.44	0.749188	0.0225546
ENSRNOG00000019272	Gkap1	ensembl	2422.76	1781.5	0.731585	0.0226607
ENSRNOG00000038552	AABR07009978.1	ensembl	5.16213	1.06227	0.221232	0.0227256
ENSRNOG00000058298	Olr1231	ensembl	0	3.35602	28.6482	0.0227348
ENSRNOG00000029126	Prl7a4	ensembl_havana	0	3.35602	28.6482	0.0227441
ENSRNOG00000008030	Shc2	ensembl	163.207	104.644	0.639226	0.0227562
ENSRNOG00000035526	Mir3588	ensembl	16.7843	34.7104	2.01836	0.0227861
ENSRNOG00000051073	Rn50_X_1141.3	havana	51.79	30.3418	0.583704	0.0228303
ENSRNOG00000021268	LOC681292	ensembl	19.2578	36.3233	1.88364	0.022844
ENSRNOG00000061126	SCARNA24	ensembl	2.46982	0	0.0474737	0.022911
ENSRNOG00000006283	LOC100362400	ensembl	564.379	760.894	1.34167	0.0229446
ENSRNOG00000003330	Acsf2	ensembl	757.968	520.916	0.683419	0.022981
ENSRNOG00000014630	Iws1	ensembl	3271.13	2456.8	0.747937	0.0229984
ENSRNOG00000002468	Tnr	ensembl_havana	2156.34	1561.73	0.720999	0.0230519
ENSRNOG00000003562	Susd4	ensembl	603.834	443.273	0.730917	0.0231105
ENSRNOG00000055920	SNORA63	ensembl	1.08139	6.2627	5.86267	0.0231161
ENSRNOG00000033153	Sfn	ensembl	103.891	54.189	0.519394	0.0232073
ENSRNOG00000053138	SNORA48	ensembl	3.36796	10.079	2.87538	0.0232739
ENSRNOG00000038004	Zfp804a	ensembl	316.377	196.06	0.616925	0.0233265
ENSRNOG00000057165	Igkv7-33	ensembl	6.26182	0	0.0192412	0.0233383
ENSRNOG00000010993	Dpm1	ensembl	430.686	618.169	1.43047	0.0233428
ENSRNOG00000012794	Grhpr	ensembl	310.898	437.098	1.40143	0.0233644
ENSRNOG00000009131	Zc3h12a	ensembl	15.4244	29.3355	1.90291	0.0233893
ENSRNOG00000038330	RGD1359508	ensembl	96.1695	161.662	1.66622	0.0234178
ENSRNOG00000060482	Iqcj	ensembl	21.604	41.7431	1.92537	0.0234407
ENSRNOG00000061488	AABR07026557.2	ensembl	10.7298	23.5034	2.21551	0.0234548
ENSRNOG00000040273	RGD1562402	ensembl	763.767	576.35	0.751337	0.023546
ENSRNOG00000016498	AABR07004112.1	ensembl	8667.43	6293.53	0.723569	0.0235472
ENSRNOG00000028194	Serpinb13	ensembl	0	2.79693	23.7678	0.0236808
ENSRNOG00000003881	Nit1	ensembl	1286.22	1700.31	1.31546	0.0237009
ENSRNOG00000047567	AABR07044952.1	ensembl	6.32786	1.06227	0.186937	0.0237114
ENSRNOG00000019840	Mdp1	ensembl	249.545	370.843	1.47918	0.0238142
ENSRNOG00000011029	Sec11a	ensembl	1302.28	1728.08	1.321	0.0238275
ENSRNOG00000052561	U2	ensembl	3.68918	11.8708	3.28575	0.0238549
ENSRNOG00000060831	Clca1	ensembl	35.0991	19.42	0.548392	0.0238987
ENSRNOG00000024640	Oacyl	ensembl	101.576	29.1626	0.285585	0.0239271
ENSRNOG00000058486	AABR07021220.1	ensembl	3305.09	2367.81	0.713656	0.0239913
ENSRNOG00000055297	AABR07005633.1	ensembl	337.311	211.321	0.622832	0.0240533
ENSRNOG00000007152	Bhlhe40	ensembl	772.163	541.904	0.697812	0.0240785
ENSRNOG00000004062	C4bpa	ensembl	0	4.36933	36.608	0.0241552
ENSRNOG00000004050	Snrk	ensembl	1629.6	1238.33	0.75646	0.0241586
ENSRNOG00000053820	AABR07071661.1	ensembl	163.357	109.678	0.669933	0.0242548
ENSRNOG00000055661	AABR07065420.1	ensembl	1072.86	809.17	0.750756	0.0244154
ENSRNOG00000046137	AABR07051804.1	ensembl	0	3.75435	30.8546	0.024467
ENSRNOG00000007675	Gpr63	ensembl	132.643	84.5478	0.635105	0.0246844
ENSRNOG00000061327	AABR07004421.1	ensembl	1.67271	6.71811	3.5339	0.0247364
ENSRNOG00000017810	Uros	ensembl	59.8855	29.7268	0.494734	0.02476
ENSRNOG00000020792	Etv4	ensembl	18.3687	37.2745	1.96938	0.0247652
ENSRNOG00000028116	LOC102552988	ensembl	3.77371	11.3701	2.95989	0.0247827
ENSRNOG00000003439	Il15	ensembl	12.9569	25.6825	1.95696	0.0248237
ENSRNOG00000035635	Mir448	ensembl	197.417	334.377	1.68015	0.0248489
ENSRNOG00000006311	Ccr9	ensembl	2.71485	9.01067	3.43393	0.0248662
ENSRNOG00000051957	AC126897.1	ensembl	20.4695	39.4396	1.90767	0.0248742
ENSRNOG00000019757	Dpep3	ensembl	6.08514	1.34241	0.238366	0.0249551
ENSRNOG00000017421	Alpk2	ensembl	66.7031	38.7732	0.580996	0.0249894
ENSRNOG00000009897	Clcnkb	ensembl	2.57689	8.84739	3.40191	0.0251239
ENSRNOG00000024533	Eogt	ensembl	470.485	638.24	1.34921	0.0252028
ENSRNOG00000060851	AC105662.2	ensembl	535.022	736.473	1.36993	0.0252906
ENSRNOG00000052070	Aldh1a3	ensembl	44.2979	24.2996	0.549796	0.0254685
ENSRNOG00000013505	Vdac2	ensembl	10075.5	7698.12	0.760501	0.0254754
ENSRNOG00000022800	Sp140	ensembl	235.523	346.125	1.46346	0.0255126
ENSRNOG00000051865	Metazoa_SRP	ensembl	1280.48	2077.74	1.61791	0.0255853
ENSRNOG00000020434	Ascl2	ensembl	1.34917	7.39421	5.26636	0.025639
ENSRNOG00000047365	LOC687780	ensembl	572.066	763.549	1.32824	0.0256674
ENSRNOG00000004918	Kcna4	ensembl	763.853	541.501	0.705622	0.0257186
ENSRNOG00000024509	Trim52	ensembl	0.329569	3.97251	9.29623	0.0257329
ENSRNOG00000030983	B3galt5	ensembl	312.608	215.735	0.687278	0.0257702
ENSRNOG00000042030	Nlrp4a	ensembl	0	3.69576	31.2488	0.0257888
ENSRNOG00000056070	AABR07018476.1	ensembl	0.253393	3.58144	8.63763	0.0257973
ENSRNOG00000053480	SNORA43	ensembl	0.253393	3.58144	8.63768	0.0258047
ENSRNOG00000016299	Klf4	ensembl	208.98	142.812	0.681438	0.0260206
ENSRNOG00000008720	Wbp1	ensembl	166.773	246.641	1.46922	0.0260479
ENSRNOG00000022934	Rps2-ps6	ensembl	128.42	216.248	1.67945	0.0261649
ENSRNOG00000004980	Rangrf	ensembl	145.711	96.7684	0.659567	0.0261704
ENSRNOG00000004171	Dnah9	ensembl	3521.73	4968.16	1.40366	0.0261879
ENSRNOG00000000986	Camsap3	ensembl	151.563	96.004	0.631643	0.0261917
ENSRNOG00000012315	Agmat	ensembl	6.99322	17.7497	2.52379	0.0262424
ENSRNOG00000035645	Mir18a	ensembl	0	2.74206	23.5228	0.0262511
ENSRNOG00000018656	Ampd1	ensembl	2.17114	7.8351	3.51969	0.0262605
ENSRNOG00000039990	MGC114246	ensembl	0	2.74087	23.5332	0.0262731
ENSRNOG00000004865	Pkd1l1	ensembl	10.3076	23.391	2.30119	0.0262993
ENSRNOG00000036243	Mir493	ensembl	2.84467	0	0.0416521	0.0263164
ENSRNOG00000021079	Fxyd1	ensembl	603.447	945.137	1.55971	0.0263202
ENSRNOG00000053462	SNORA14	ensembl	81.3488	147.189	1.80513	0.0263319
ENSRNOG00000059319	Rn60_17_0530.1	havana	53.1402	29.0971	0.545278	0.0263722
ENSRNOG00000049676	St6galnac5	ensembl	305.173	213.873	0.698935	0.0263854
ENSRNOG00000054709	AABR07061382.2	ensembl	6.49692	1.73702	0.283207	0.0263911
ENSRNOG00000058852	Rps2-ps1	havana	11.7517	23.1123	1.94784	0.0264149
ENSRNOG00000056608	Y_RNA	ensembl	11.7315	35.3475	2.92858	0.0264373
ENSRNOG00000004292	Sptssa	ensembl	2166.34	1629.72	0.748969	0.0264435
ENSRNOG00000053172	Ssr4	ensembl	459.096	662.031	1.43635	0.026588
ENSRNOG00000049219	Rnf187	ensembl	2734.26	2095.66	0.763156	0.0266302
ENSRNOG00000061691	AABR07030939.1	ensembl	116.339	69.7651	0.59815	0.0266385
ENSRNOG00000053654	AABR07061614.2	ensembl	1922.71	1425.1	0.738203	0.026642
ENSRNOG00000042690	Zmat4	ensembl	546.801	394.777	0.719056	0.0267093
ENSRNOG00000029087	Nap1l3	ensembl	1436.43	1037.01	0.718638	0.0267206
ENSRNOG00000031833	RGD1562392	ensembl_havana	0	3.35838	28.5847	0.0267249
ENSRNOG00000017888	Ctsr	ensembl	0	3.35838	28.5846	0.0267355
ENSRNOG00000018241	Ank1	ensembl	241.166	151.036	0.623852	0.0267822
ENSRNOG00000024521	Spata16	ensembl_havana	0.506786	3.5838	5.10583	0.026837
ENSRNOG00000050864	LOC100910990	ensembl	196.589	285.381	1.44508	0.0269154
ENSRNOG00000021058	Grwd1	ensembl	181.153	125.199	0.686766	0.0269495
ENSRNOG00000050349	Mylk4	ensembl	8.8785	2.4631	0.27964	0.0270172
ENSRNOG00000021689	Rps6kb2	ensembl	164.967	238.997	1.44006	0.0270611
ENSRNOG00000004909	Cnot2	ensembl	1299.53	1732.35	1.32681	0.0270649
ENSRNOG00000002414	Tfcp2l1	ensembl	92.0569	137.62	1.49168	0.0270956
ENSRNOG00000001931	Fgf12	ensembl	707.349	505.798	0.711141	0.0271178
ENSRNOG00000051158	Cfb	ensembl_havana	25.3285	43.331	1.69759	0.0272323
ENSRNOG00000054136	Xkrx	ensembl	2.8159	9.627	3.36925	0.0272624
ENSRNOG00000009152	Caprin1	ensembl	12357.8	9607.89	0.774037	0.0272704
ENSRNOG00000017029	Snx1	ensembl	609.238	826.427	1.35114	0.0273781
ENSRNOG00000042598	LOC100909977	ensembl	0.253393	4.0333	9.65923	0.0274201
ENSRNOG00000004624	Rnd3	ensembl	1756.33	2297.34	1.30173	0.0275198
ENSRNOG00000027249	Fancl	ensembl	61.6948	110.035	1.76108	0.0275737
ENSRNOG00000039249	Rpl31l4	ensembl	1707.42	1252.1	0.730101	0.0276134
ENSRNOG00000012236	Hddc3	ensembl	1205.28	925.527	0.764246	0.0276684
ENSRNOG00000030476	LOC100364457	ensembl	600.36	819.388	1.35862	0.0277542
ENSRNOG00000004723	Fcf1	ensembl	733.393	537.168	0.728702	0.0277948
ENSRNOG00000014899	AC110824.1	ensembl	76.2184	44.9895	0.586755	0.0277974
ENSRNOG00000046192	Nsun4	ensembl	44.5101	70.6778	1.58726	0.0278151
ENSRNOG00000055390	SNORD10	ensembl	9.29843	25.1496	2.67454	0.0278369
ENSRNOG00000031671	Rasgef1a	ensembl	377.389	252.84	0.668478	0.0278558
ENSRNOG00000004730	Meis2	ensembl	318.458	132.023	0.412095	0.0279577
ENSRNOG00000005958	Rrbp1	ensembl	1562.66	1156.49	0.736054	0.0280063
ENSRNOG00000051207	Rn50_13_0836.2	havana	95.3718	60.5444	0.630955	0.0280309
ENSRNOG00000007332	Sstr3	ensembl	64.868	33.5618	0.517981	0.0280514
ENSRNOG00000004060	Calm3	ensembl	32718.4	25047.6	0.762452	0.0281993
ENSRNOG00000043280	Vom2r38	ensembl	3.91167	10.5773	2.74467	0.0282052
ENSRNOG00000053927	SCARNA7	ensembl	6591.27	9114.87	1.37789	0.0283592
ENSRNOG00000025964	AABR07021005.1	ensembl	173.854	113.775	0.654333	0.0283655
ENSRNOG00000033665	Mrgprx2	ensembl	0.360465	4.70079	11.0087	0.0283817
ENSRNOG00000019470	Hao2	ensembl	0.360465	4.69606	11.0243	0.0284968
ENSRNOG00000061053	AABR07007997.1	ensembl	27.7161	48.8769	1.74672	0.028507
ENSRNOG00000013408	Npas2	ensembl	201.312	136.709	0.674596	0.0285288
ENSRNOG00000015264	Lrrc38	ensembl	9.51045	3.24524	0.347	0.0285484
ENSRNOG00000009760	Palm	ensembl	276.507	194.091	0.699367	0.0285892
ENSRNOG00000009372	Tacr3	ensembl	40.871	7.39286	0.181513	0.0286399
ENSRNOG00000047319	Caprin2	ensembl	956.036	468.784	0.486449	0.0286902
ENSRNOG00000004057	Ccdc88a	ensembl	6966.63	5084.71	0.726808	0.0287012
ENSRNOG00000010833	Mthfd2	ensembl	123.532	70.6808	0.568548	0.028728
ENSRNOG00000029798	Lrrc4c	ensembl	677.512	486.084	0.714217	0.0287443
ENSRNOG00000017858	Tsr3	ensembl	71.878	39.0475	0.539621	0.0287579
ENSRNOG00000020264	Dhrs1	ensembl	121.688	176.024	1.44145	0.0287598
ENSRNOG00000049610	AABR07068850.1	ensembl	1.52639	7.38103	4.51905	0.0287603
ENSRNOG00000030269	Atp2b2	ensembl	3312.75	2468.58	0.741603	0.0287636
ENSRNOG00000002932	Wdr19	ensembl	1656.19	2235.88	1.34384	0.0287974
ENSRNOG00000004958	Slc22a22	ensembl	0	4.03313	33.8933	0.0288017
ENSRNOG00000048194	Capns1	ensembl	464.989	255.014	0.545937	0.0288211
ENSRNOG00000017163	Pfkp	ensembl	3800.69	2887.05	0.755859	0.0288308
ENSRNOG00000002396	Serpinb8	ensembl	3.84385	11.7002	2.92768	0.0288362
ENSRNOG00000023628	Tmem106a	ensembl	56.9886	91.2472	1.60123	0.0289256
ENSRNOG00000008040	Fam64a	ensembl	0.867251	5.14555	5.15145	0.0289257
ENSRNOG00000059292	AABR07064373.1	ensembl	271.9	408.817	1.49821	0.0289846
ENSRNOG00000035646	Mir30a	ensembl	61.7362	32.1926	0.51378	0.0290482
ENSRNOG00000052844	AABR07068799.1	ensembl	17.478	32.5235	1.86648	0.0291504
ENSRNOG00000016952	Uqcr11	ensembl	1021.59	1408.06	1.37256	0.0292102
ENSRNOG00000052340	AABR07027810.2	ensembl	1.31828	6.26862	4.61916	0.0292253
ENSRNOG00000012022	RGD1562914	ensembl	0.988708	5.53662	5.32475	0.0293042
ENSRNOG00000017672	Akr1c14	ensembl	546.832	399.699	0.727649	0.0293349
ENSRNOG00000010720	Mast4	ensembl	893.675	608.342	0.676725	0.0293438
ENSRNOG00000016751	Slc25a28	ensembl	527.546	392.179	0.740039	0.0293745
ENSRNOG00000039336	Hrct1	ensembl	10.1408	20.654	2.03994	0.0293762
ENSRNOG00000032635	LOC100910370	ensembl	2220.52	3001.49	1.34532	0.0294086
ENSRNOG00000002434	Tmem100	ensembl	578.279	427.613	0.735686	0.0294644
ENSRNOG00000007356	Chmp3	ensembl	2628.86	3491.8	1.32273	0.0295085
ENSRNOG00000009274	Fut11	ensembl	134.985	90.4093	0.666249	0.0296003
ENSRNOG00000026745	Acsl6	ensembl	9841.15	7575.71	0.766306	0.029629
ENSRNOG00000017839	Ercc1	ensembl	70.7376	111.568	1.5698	0.0296594
ENSRNOG00000015633	Cul3	ensembl	5886.78	4439.26	0.75058	0.0297938
ENSRNOG00000008943	Penk	ensembl	455.047	180.851	0.395303	0.029853
ENSRNOG00000003672	Enam	ensembl	7.92227	19.153	2.39409	0.029883
ENSRNOG00000023385	Rpl37a	ensembl	153.059	229.83	1.48963	0.0299487
ENSRNOG00000057955	U2	ensembl	76.7422	136.686	1.77008	0.0299588
ENSRNOG00000021795	Fam227a	ensembl	340.951	498.376	1.45146	0.0299683
ENSRNOG00000049239	LOC102546376	ensembl	0.867251	7.78613	7.75237	0.0300419
ENSRNOG00000003430	F9	ensembl	0.506786	4.69606	6.94382	0.0300563
ENSRNOG00000059222	U6	ensembl	0	3.08061	26.1632	0.0301246
ENSRNOG00000052617	SNORD67	ensembl	2.53996	0	0.0445877	0.0301266
ENSRNOG00000005379	Prp2	ensembl	0	3.08061	26.1632	0.0301349
ENSRNOG00000011394	Kif3c	ensembl	1710.72	1186.65	0.690709	0.0301749
ENSRNOG00000006122	Igf2bp1	ensembl	3.0075	9.62936	3.09023	0.0302308
ENSRNOG00000031203	Scfd1	ensembl	2358.13	1821.47	0.768531	0.0302766
ENSRNOG00000010617	Scube1	ensembl	135.217	72.651	0.537504	0.0303951
ENSRNOG00000059728	AABR07057421.3	ensembl	0.506786	3.86512	5.59802	0.0304096
ENSRNOG00000008987	Rnf139	ensembl	1424.41	1100.6	0.769162	0.0304826
ENSRNOG00000060888	LOC100912027	ensembl	30.0643	15.9542	0.53039	0.0304914
ENSRNOG00000020993	Ms4a2	ensembl	15.5052	6.54757	0.42366	0.0305267
ENSRNOG00000037211	Kif14	ensembl	5.53698	14.0502	2.49035	0.03056
ENSRNOG00000022994	Nlrp5	ensembl	3.59649	0.392252	0.131763	0.0306473
ENSRNOG00000012100	Ssbp1	ensembl	979.316	713.768	0.72567	0.0308575
ENSRNOG00000027022	AABR07043654.1	ensembl	1857.11	1383.07	0.741411	0.0308801
ENSRNOG00000061796	AABR07016947.2	ensembl	0.506786	4.4242	6.48402	0.0308902
ENSRNOG00000015242	Fbxl8	ensembl	37.0027	20.6026	0.548848	0.030966
ENSRNOG00000055237	SNORA8	ensembl	11.2865	4.31107	0.374042	0.0309889
ENSRNOG00000037707	Armcx6	ensembl	234.806	346.442	1.46936	0.0309902
ENSRNOG00000011726	Grin1	ensembl	1008.2	692.855	0.683379	0.0310248
ENSRNOG00000008595	Ttc12	ensembl	591.843	805.963	1.35622	0.0310789
ENSRNOG00000011909	Rasa2	ensembl	531.757	709.479	1.32782	0.0310962
ENSRNOG00000019533	Klhl3	ensembl	42.3001	75.0817	1.76896	0.0311955
ENSRNOG00000014044	Pank4	ensembl	235.214	339.935	1.44166	0.0312085
ENSRNOG00000019685	Gdpd3	ensembl	2.27821	8.06288	3.53068	0.0312171
ENSRNOG00000032656	Ptprt	ensembl	273.674	175.816	0.639074	0.0312457
ENSRNOG00000037339	Siglec10	ensembl	3.77371	10.2958	2.72965	0.0312531
ENSRNOG00000052544	SNORA36	ensembl	3.38235	9.29097	2.65301	0.0314632
ENSRNOG00000050771	AABR07026300.1	ensembl	61.3938	36.7012	0.594405	0.0314844
ENSRNOG00000025179	LOC100361061	ensembl	2210.62	2898.09	1.30473	0.0315389
ENSRNOG00000013919	Ift46	ensembl	1447.06	1931.92	1.32855	0.0315479
ENSRNOG00000055436	U1	ensembl	1.70964	7.78291	4.48138	0.0315562
ENSRNOG00000050572	Vom2r62	ensembl	0.360465	5.03935	11.6883	0.0315584
ENSRNOG00000052174	LOC100361920	ensembl	127.281	195.031	1.52014	0.0316081
ENSRNOG00000020587	Efemp2	ensembl	363.873	526.722	1.44068	0.0316082
ENSRNOG00000019354	Ptch1	ensembl	1560.3	1125.48	0.717093	0.031609
ENSRNOG00000055020	LOC679731	havana	219.301	317.701	1.44036	0.0316199
ENSRNOG00000059714	Hsp90aa1	ensembl	28575	21370.4	0.744951	0.0316649
ENSRNOG00000028826	AC128901.1	ensembl	38.6582	62.7437	1.61092	0.0316656
ENSRNOG00000056059	Trbv13-2	ensembl	0.613858	4.75685	6.69245	0.0316666
ENSRNOG00000006947	Pdhx	ensembl	952.026	722.304	0.755672	0.0317372
ENSRNOG00000025594	Scrt1	ensembl	26.1276	10.4105	0.395927	0.031785
ENSRNOG00000055424	AC108631.1	ensembl	131.486	82.6915	0.630141	0.0318152
ENSRNOG00000020882	Shkbp1	ensembl	30.977	50.092	1.59986	0.03182
ENSRNOG00000023431	LOC102555635	ensembl	427.629	307.436	0.715406	0.0318319
ENSRNOG00000014490	Bdh2	ensembl	62.3099	96.657	1.54899	0.0318446
ENSRNOG00000025925	Txk	ensembl	10.5059	3.13549	0.300818	0.0319659
ENSRNOG00000006236	Dsn1	ensembl	15.4862	28.0921	1.8263	0.0319762
ENSRNOG00000027088	Ube2k	ensembl	2555.6	1981.79	0.771516	0.0320084
ENSRNOG00000004923	Map4k5	ensembl	1069.64	1400.47	1.30262	0.0320297
ENSRNOG00000024142	Arglu1	ensembl_havana	2727.31	2054.59	0.750393	0.0320486
ENSRNOG00000056569	U6	ensembl	0	2.57641	21.437	0.0321612
ENSRNOG00000023863	Gpr139	ensembl	30.3272	12.8771	0.427508	0.0321824
ENSRNOG00000019807	Sufu	ensembl	105.907	71.3633	0.67269	0.0322349
ENSRNOG00000060104	AC113785.3	ensembl	0	3.02101	25.8929	0.0322466
ENSRNOG00000026430	Trim58	ensembl	0	3.02101	25.8929	0.0322544
ENSRNOG00000061831	AABR07068705.1	ensembl	0	3.01982	25.9064	0.0322571
ENSRNOG00000016681	Mc2r	ensembl	0	3.02101	25.8928	0.0322682
ENSRNOG00000050124	Olr1145	ensembl	0	3.01982	25.9063	0.0322686
ENSRNOG00000011635	Ces2e	ensembl	0	3.01982	25.9062	0.0322839
ENSRNOG00000026844	Lypd8	ensembl	1.41932	5.71071	3.53351	0.032308
ENSRNOG00000007200	Ikzf3	ensembl	3.1515	10.5142	3.45538	0.0323416
ENSRNOG00000052407	Btk	ensembl	53.6607	33.2424	0.619334	0.0323421
ENSRNOG00000049334	Atp2c2	ensembl	47.9511	79.6474	1.64016	0.0323692
ENSRNOG00000001163	Srsf9	ensembl	224.303	155.464	0.689784	0.0323766
ENSRNOG00000014518	Adam28	ensembl	0.720929	9.80566	12.5294	0.032396
ENSRNOG00000056474	AC096239.2	ensembl	108.781	61.9699	0.569779	0.0324605
ENSRNOG00000020016	LOC100361543	ensembl	594.993	440.393	0.736974	0.0324989
ENSRNOG00000019293	LOC100911840	ensembl	98.5011	148.891	1.49908	0.0326175
ENSRNOG00000054736	Vom2r16	ensembl	0	3.35957	28.5278	0.0326799
ENSRNOG00000031562	Vom2r31	ensembl	0	3.35957	28.5278	0.032691
ENSRNOG00000017836	Rrp36	ensembl	213.334	142.319	0.664229	0.0327493
ENSRNOG00000050128	LOC100910636	ensembl	9.25102	22.7733	2.45297	0.032857
ENSRNOG00000038258	Upb1	ensembl	11.3829	24.9146	2.197	0.0329019
ENSRNOG00000012393	S100a13	ensembl	1488.53	2075.58	1.38753	0.0329617
ENSRNOG00000001861	Ydjc	ensembl	118.186	71.2429	0.600293	0.0329809
ENSRNOG00000012566	Kcnv2	ensembl	19.2276	8.95478	0.456145	0.0330026
ENSRNOG00000054418	AABR07005779.3	ensembl	2048.49	1552.71	0.754427	0.0330192
ENSRNOG00000002626	Car10	ensembl	181.42	118.055	0.648616	0.033156
ENSRNOG00000059471	SNORA17	ensembl	0.329569	3.80788	9.06543	0.0332382
ENSRNOG00000000053	Crp	ensembl	3.23603	11.0886	3.41603	0.0332414
ENSRNOG00000046949	Kcnb1	ensembl	366.649	259.122	0.703387	0.0332429
ENSRNOG00000035636	Mirlet7b	ensembl	11.867	24.7898	2.10463	0.0332498
ENSRNOG00000049062	Trappc2b	ensembl	232.115	346.693	1.48593	0.0333976
ENSRNOG00000011550	Kcnab2	ensembl	839.225	599.206	0.710795	0.0334246
ENSRNOG00000025580	LOC100912618	ensembl	674.799	507.36	0.748291	0.0334844
ENSRNOG00000020107	Stk11ip	ensembl	262.44	362.684	1.37439	0.0335134
ENSRNOG00000061056	AABR07042514.3	ensembl	1.93213	8.06068	4.01065	0.0335409
ENSRNOG00000037340	Epha10	ensembl	97.2212	61.2174	0.628671	0.0336505
ENSRNOG00000016773	Sap130	ensembl	371.375	264.148	0.707771	0.0336866
ENSRNOG00000052774	AC123253.2	ensembl	31.4424	57.2222	1.80562	0.0337353
ENSRNOG00000057335	Clec1b	ensembl	39.6381	77.5031	1.96269	0.0337727
ENSRNOG00000060132	AABR07028150.1	ensembl	0	3.47405	29.1616	0.0338175
ENSRNOG00000055749	Metazoa_SRP	ensembl	12.481	25.8004	2.0533	0.0338591
ENSRNOG00000014576	Dock3	ensembl	958.143	681.875	0.707476	0.0339044
ENSRNOG00000060570	U11	ensembl	4.65534	11.6455	2.46006	0.0339359
ENSRNOG00000017692	Ppp1r37	ensembl	460.642	345.075	0.746122	0.0339973
ENSRNOG00000010558	Ppif	ensembl	92.655	137.348	1.47435	0.0340008
ENSRNOG00000060709	AABR07046866.1	ensembl	26.4906	14.1588	0.531995	0.0340542
ENSRNOG00000026060	Arsi	ensembl	32.649	55.3353	1.70155	0.0340599
ENSRNOG00000059639	SNORA44	ensembl	1.0196	5.03951	4.76635	0.0343671
ENSRNOG00000003365	Cadm3	ensembl	1015.46	716.774	0.702351	0.0343863
ENSRNOG00000051847	LOC686748	ensembl	0	5.0429	41.923	0.034445
ENSRNOG00000050915	AABR07070416.2	ensembl	0	5.0429	41.923	0.0344576
ENSRNOG00000036960	Abcc9	ensembl	288.173	210.897	0.728912	0.0344588
ENSRNOG00000059503	AABR07005596.1	ensembl	168.1	244.693	1.4433	0.034486
ENSRNOG00000019047	Ola1	ensembl	2991.31	2274.43	0.757101	0.034564
ENSRNOG00000011026	Irf2bpl	ensembl	170.673	119.736	0.698479	0.0346574
ENSRNOG00000019706	Phox2a	ensembl	42.379	72.3983	1.68403	0.0346628
ENSRNOG00000033543	Olr442	ensembl	0.690034	5.37081	7.28873	0.034715
ENSRNOG00000023387	LOC679739	ensembl_havana	204.014	284.9	1.38924	0.03475
ENSRNOG00000055562	Dkc1	ensembl_havana	454.075	321.822	0.703994	0.0347911
ENSRNOG00000022893	Rimbp2	ensembl	310.933	202.662	0.650725	0.034904
ENSRNOG00000010929	Tcam1	ensembl	4.34832	11.4191	2.68751	0.0349344
ENSRNOG00000001184	Pknox1	ensembl	231.742	166.289	0.714498	0.0349424
ENSRNOG00000047369	LOC100910057	ensembl_havana	0.582962	5.37081	7.60225	0.0349717
ENSRNOG00000000587	Rpf2	ensembl	589.204	850.013	1.43533	0.035016
ENSRNOG00000051845	7SK	ensembl	0	3.02219	25.8587	0.0352432
ENSRNOG00000057147	Praf2	ensembl	64.1303	38.3547	0.596972	0.0352493
ENSRNOG00000048469	AC121031.1	ensembl	1.77978	8.51458	4.46236	0.0353245
ENSRNOG00000022406	Cylc2	ensembl	0	3.69694	31.1744	0.0354017
ENSRNOG00000002827	Rbfox1	ensembl	1322	957.163	0.721142	0.0354152
ENSRNOG00000021406	AABR07067805.1	ensembl	12.3349	26.4717	2.09388	0.0354585
ENSRNOG00000011439	Grk5	ensembl	516.506	362.347	0.698564	0.035508
ENSRNOG00000057505	AABR07015015.2	ensembl	19.9666	10.0694	0.509508	0.0356397
ENSRNOG00000040108	Cd36	ensembl_havana	101.851	151.098	1.47347	0.0356401
ENSRNOG00000027480	Tmem116	ensembl	17.8308	32.2387	1.76797	0.0356821
ENSRNOG00000011276	Tmem254	ensembl_havana	220.79	316.641	1.42906	0.0357036
ENSRNOG00000032350	Kcnip4	ensembl	568.857	377.183	0.659969	0.0357887
ENSRNOG00000003927	Cd55	ensembl	121.326	64.5142	0.529856	0.0357941
ENSRNOG00000025059	Nxph4	ensembl	34.1445	18.856	0.557313	0.0358163
ENSRNOG00000006440	Ift27	ensembl	433.36	610.136	1.40041	0.0358688
ENSRNOG00000048309	Uqcc1	ensembl	1284.57	986.302	0.764449	0.0359758
ENSRNOG00000059711	AABR07019449.1	ensembl	0.360465	3.64104	8.42342	0.0360357
ENSRNOG00000061125	7SK	ensembl	6.02938	13.3182	2.15407	0.0360774
ENSRNOG00000058566	LOC103694381	ensembl	12.7465	24.5669	1.93299	0.0360926
ENSRNOG00000042596	Fam205a	ensembl	4.09725	0.784505	0.194698	0.0361344
ENSRNOG00000026679	Scn4b	ensembl	233.4	151.378	0.64592	0.0361989
ENSRNOG00000002615	Pmm2	ensembl	576.726	788.678	1.35956	0.0362937
ENSRNOG00000019687	Art2b	ensembl_havana	0	2.90905	24.3496	0.0363956
ENSRNOG00000007981	Klhl23	ensembl	1259.15	975.2	0.771041	0.0364469
ENSRNOG00000047293	LOC100366030	ensembl	14.0859	27.5987	1.89497	0.0364703
ENSRNOG00000002285	Fam122b	ensembl	93.9886	141.773	1.50765	0.0365023
ENSRNOG00000056057	AABR07030425.1	ensembl	3.75932	0.392252	0.124641	0.0365266
ENSRNOG00000019180	Acsl4	ensembl	2439.81	1847.82	0.753871	0.0365954
ENSRNOG00000050831	Vom2r36	ensembl	4.22473	12.5431	2.97624	0.0366159
ENSRNOG00000003201	Rps4x	ensembl_havana	533.546	711.858	1.32795	0.0366981
ENSRNOG00000012471	Thbs4	ensembl	10.1327	19.5331	1.91402	0.0367665
ENSRNOG00000051430	AC117091.3	ensembl	2.39364	0	0.0482177	0.0367954
ENSRNOG00000035536	Mir28	ensembl	2.39364	0	0.0482178	0.0368055
ENSRNOG00000031802	LOC100360056	ensembl	538.035	709.019	1.31071	0.0368281
ENSRNOG00000024845	Mrps21	ensembl	675.822	911.47	1.34324	0.0368396
ENSRNOG00000022199	Zmynd12	ensembl_havana	84.4842	131.217	1.53468	0.0369722
ENSRNOG00000051600	Klra5	ensembl	0.329569	4.70315	11.0921	0.037057
ENSRNOG00000055278	AABR07059380.1	ensembl	409.165	264.437	0.642892	0.0370708
ENSRNOG00000021867	AABR07009508.1	ensembl	4.40195	0.672386	0.182178	0.037081
ENSRNOG00000014143	Col24a1	ensembl	15.4162	28.3769	1.82897	0.0371029
ENSRNOG00000000901	Crcp	ensembl	695.334	951.01	1.36063	0.0371981
ENSRNOG00000058875	U6	ensembl	1.70964	6.43916	3.79622	0.0372099
ENSRNOG00000007907	Tmem178a	ensembl	160.283	104.281	0.648347	0.0373024
ENSRNOG00000045975	AABR07067388.1	ensembl	20.2983	10.4117	0.508601	0.0373522
ENSRNOG00000016388	Sphkap	ensembl	4266.59	3252.08	0.759252	0.0373864
ENSRNOG00000018642	Leng8	ensembl	961.762	1270.07	1.31347	0.0374466
ENSRNOG00000061012	Kat5	ensembl	960.301	734.316	0.760619	0.0375228
ENSRNOG00000037768	Rab43	ensembl	79.6341	51.4347	0.640313	0.0375822
ENSRNOG00000014070	Krt13	ensembl_havana	11.4057	22.7321	1.95764	0.03759
ENSRNOG00000054096	LOC688812	ensembl	505.583	365.967	0.720452	0.0375978
ENSRNOG00000023861	Snap91	ensembl	3130.31	2308.22	0.733325	0.0376113
ENSRNOG00000000833	Vars2	ensembl_havana	161.567	109.095	0.671823	0.0376461
ENSRNOG00000029598	Robo2	ensembl_havana	1491.94	998.127	0.665357	0.03772
ENSRNOG00000030880	Hs6st2	ensembl	254.219	156.576	0.613399	0.0377777
ENSRNOG00000003972	Tshr	ensembl_havana	80.0669	120.125	1.49072	0.0378207
ENSRNOG00000002152	Dcun1d4	ensembl	1687.74	2203.63	1.29957	0.0378457
ENSRNOG00000046540	Ugt2b37	ensembl_havana	8.07462	19.1897	2.40393	0.0378649
ENSRNOG00000020486	Bcl2l12	ensembl	12.9464	26.2048	1.99968	0.0378995
ENSRNOG00000006319	Cxcr6	ensembl	2.31746	8.72952	3.47044	0.037966
ENSRNOG00000017718	Tmco6	ensembl	152.922	219.386	1.4291	0.037981
ENSRNOG00000012218	Poteg	ensembl	0	2.51916	21.17	0.0380797
ENSRNOG00000038140	Whsc1	ensembl	2544.16	1957.93	0.766362	0.0381338
ENSRNOG00000039931	Muc16	ensembl	0.253393	4.36578	10.8341	0.0381704
ENSRNOG00000030547	Dpp6	ensembl	3553.87	2627.92	0.735316	0.0382161
ENSRNOG00000023803	Cmya5	ensembl	61.4178	93.7624	1.52389	0.0382247
ENSRNOG00000004882	Capn6	ensembl	308.009	436.172	1.40917	0.0382291
ENSRNOG00000035586	Mir301a	ensembl	3.59649	12.7733	3.52387	0.0382472
ENSRNOG00000016286	Iyd	ensembl	3.40721	10.6786	2.95664	0.0382804
ENSRNOG00000005437	Hrsp12	ensembl	2802.44	3642.95	1.29369	0.0382869
ENSRNOG00000000985	Cpsf4	ensembl_havana	157.879	107.763	0.682032	0.0383117
ENSRNOG00000028869	RGD1563958	ensembl	0.659138	6.16376	8.19733	0.0383241
ENSRNOG00000034031	Vstm2l	ensembl	40.9395	19.1471	0.465506	0.0383944
ENSRNOG00000014078	Ndufb8	ensembl	1450.8	1115.41	0.765519	0.0384038
ENSRNOG00000008873	Ino80b	ensembl	375.366	503.245	1.33395	0.0384983
ENSRNOG00000018123	Ccny	ensembl	1963.5	1511.02	0.766424	0.0385504
ENSRNOG00000013386	Psmb5	ensembl	512.174	692.531	1.34811	0.0385613
ENSRNOG00000006617	Cntnap2	ensembl_havana	1059.45	787.206	0.738832	0.0386063
ENSRNOG00000002916	Car4	ensembl	78.0088	51.5452	0.658995	0.0386168
ENSRNOG00000016398	Clstn1	ensembl	6502.56	4947.99	0.757066	0.038634
ENSRNOG00000014979	Themis	ensembl	3.98785	10.1862	2.62629	0.0386761
ENSRNOG00000006992	Rpl7	ensembl	9890.73	7523.84	0.757871	0.0387358
ENSRNOG00000050933	Hist1h2ao	ensembl	162.134	263.525	1.62044	0.0388004
ENSRNOG00000017622	Npm3	ensembl	20.1582	37.6463	1.85952	0.0388123
ENSRNOG00000033244	LOC688473	ensembl	6.843	14.5498	2.10759	0.0389003
ENSRNOG00000020038	Chpf	ensembl	618.235	464.629	0.748858	0.0389019
ENSRNOG00000018436	Apoa5	ensembl	57.3081	90.8951	1.58184	0.038956
ENSRNOG00000009338	Kras	ensembl	731.022	525.415	0.714379	0.0389619
ENSRNOG00000033970	Moap1	ensembl	103.118	174.731	1.68983	0.0389814
ENSRNOG00000053008	7SK	ensembl	18.0512	34.5822	1.88489	0.0390429
ENSRNOG00000014252	Irf2bp1	ensembl	466.444	353.726	0.754543	0.0390805
ENSRNOG00000031529	Cyp2b12	ensembl	0.360465	4.53869	10.4512	0.0390854
ENSRNOG00000008897	Gga1	ensembl	173.024	248.959	1.4363	0.0391078
ENSRNOG00000010085	Cldn10	ensembl	152.688	96.2296	0.629485	0.0391139
ENSRNOG00000021181	Sf3b4	ensembl	175.281	120.063	0.683404	0.0391373
ENSRNOG00000057173	Lipn	ensembl	0.360465	5.04053	11.6354	0.0391444
ENSRNOG00000058734	SNORA18	ensembl	4.28652	0.728445	0.192834	0.0392856
ENSRNOG00000000640	Egr2	ensembl	6.37334	17.5874	2.69061	0.0393132
ENSRNOG00000054796	Gm9949	ensembl	0	2.96984	24.6198	0.0393353
ENSRNOG00000016567	Otos	ensembl	27.7457	14.1027	0.50122	0.0393404
ENSRNOG00000045627	Olr552	ensembl	0	2.96984	24.6199	0.0393523
ENSRNOG00000045960	Pcdha2	ensembl	58.2606	36.1467	0.616936	0.0394589
ENSRNOG00000048337	AC126148.1	ensembl	2375.33	1796.13	0.753263	0.03952
ENSRNOG00000004891	Arl14ep	ensembl	1784.15	1384.08	0.772306	0.0395606
ENSRNOG00000027831	Map7d3	ensembl	113.586	75.4626	0.657854	0.0396818
ENSRNOG00000021011	Fut2	ensembl	33.2982	53.0512	1.58964	0.0396857
ENSRNOG00000023688	Drd1	ensembl	56.6932	24.7205	0.436997	0.0396929
ENSRNOG00000039472	AC131360.2	ensembl	79.1838	51.2092	0.64721	0.0398282
ENSRNOG00000019974	Uba52	ensembl	2059.74	1614.37	0.780342	0.0399151
ENSRNOG00000021445	Tas2r120	ensembl	0	4.7067	39.2076	0.0399966
ENSRNOG00000003259	C1qtnf1	ensembl	143.33	95.6636	0.664486	0.0400408
ENSRNOG00000036485	AABR07046831.1	ensembl	3.68705	11.6372	3.18483	0.0400454
ENSRNOG00000024917	Als2cr12	ensembl	247.07	361.687	1.45404	0.0400603
ENSRNOG00000019620	Pmf1	ensembl_havana	36.6889	61.0766	1.65804	0.0400779
ENSRNOG00000020263	Atp1a3	ensembl	3544.38	2340.98	0.656907	0.0400889
ENSRNOG00000039183	RGD1310335	ensembl	42.7675	25.3573	0.588748	0.040212
ENSRNOG00000048674	LOC102553180	ensembl	23.738	13.0404	0.55464	0.0402967
ENSRNOG00000058392	AABR07054818.1	ensembl	0	2.40586	20.7548	0.0404692
ENSRNOG00000049407	Shisa8	ensembl	6.17338	1.34477	0.242619	0.0404733
ENSRNOG00000011155	AABR07072207.1	ensembl	1936.63	1399.41	0.720325	0.040476
ENSRNOG00000058001	AC131024.1	ensembl	0	2.40586	20.7548	0.040476
ENSRNOG00000005389	LOC103694903	ensembl	582.092	789.063	1.34739	0.0404783
ENSRNOG00000047252	Olr690	ensembl	0	2.40586	20.7547	0.0404861
ENSRNOG00000020595	Rps11	ensembl	1433.72	1964.39	1.36497	0.0404886
ENSRNOG00000043422	LOC100359777	ensembl	0	2.40586	20.7547	0.0404926
ENSRNOG00000017123	B2m	ensembl	15759.3	20106.6	1.26979	0.0405458
ENSRNOG00000029079	Hspb7	ensembl_havana	5.13336	12.8758	2.45477	0.0406586
ENSRNOG00000010199	Glrb	ensembl	2065.36	1463.7	0.705103	0.0406994
ENSRNOG00000015609	Wdr27	ensembl	312.53	441.595	1.40335	0.0407461
ENSRNOG00000055431	AABR07006428.1	ensembl	2.21642	0	0.0532158	0.0407702
ENSRNOG00000004179	Nts	ensembl	263.582	135.543	0.511048	0.0407842
ENSRNOG00000022859	Trem1	ensembl	0.582962	5.8669	8.26367	0.0408955
ENSRNOG00000003834	Map2k4	ensembl	1347.9	1005.2	0.741802	0.0411311
ENSRNOG00000038864	AC135409.1	ensembl	41.3699	68.95	1.64655	0.0412607
ENSRNOG00000058879	7SK	ensembl	3.14779	0	0.0364132	0.0412822
ENSRNOG00000001806	Fetub	ensembl	18.0675	32.2922	1.77615	0.0413587
ENSRNOG00000057816	SNORA5	ensembl	112.028	175.731	1.5524	0.0413982
ENSRNOG00000032420	Hmgb1-ps3	ensembl	632.125	439.937	0.693655	0.0414161
ENSRNOG00000060970	Tnmd	ensembl_havana	9.08607	1.68097	0.198893	0.0414541
ENSRNOG00000054832	U6	ensembl	2.24732	0	0.0529189	0.0414954
ENSRNOG00000047939	LOC102546809	ensembl	2.24732	0	0.0529187	0.0415076
ENSRNOG00000017156	Ankle1	ensembl	2.24732	0	0.0529186	0.0415128
ENSRNOG00000021731	LOC103689949	ensembl	29.7268	48.3525	1.60584	0.0415364
ENSRNOG00000008125	Igbp1b	ensembl	12.0279	5.31846	0.439589	0.0416555
ENSRNOG00000014368	Eif4g3	ensembl	3326.87	2511.41	0.75108	0.0416598
ENSRNOG00000050794	Pdlim4	ensembl	158.965	228.779	1.43291	0.041775
ENSRNOG00000022432	Tmem59l	ensembl	872.849	609.057	0.694433	0.0418042
ENSRNOG00000058775	Klra5	ensembl	3.03839	8.4504	2.68414	0.0418558
ENSRNOG00000010975	Adnp	ensembl	2555.52	1878.22	0.731165	0.0419112
ENSRNOG00000054524	Tnip3	ensembl	0	3.02337	25.8057	0.0419823
ENSRNOG00000027900	Glt6d1	ensembl	0	3.02337	25.8056	0.0419972
ENSRNOG00000019794	Ovch2	ensembl	0	3.02337	25.8055	0.0420138
ENSRNOG00000014502	Triml1	ensembl	0	3.02337	25.8055	0.0420279
ENSRNOG00000007739	Rars	ensembl	980.987	1359.95	1.38027	0.0420356
ENSRNOG00000000055	Fcrl6	ensembl	0	3.02337	25.8054	0.0420439
ENSRNOG00000030174	AABR07042903.1	ensembl	81.3128	130.648	1.60072	0.0420613
ENSRNOG00000048573	Nudt11	ensembl	47.0297	73.4667	1.55369	0.0421223
ENSRNOG00000057299	7SK	ensembl	2.42454	0	0.0480318	0.0421471
ENSRNOG00000051481	SCARNA18	ensembl	283.699	395.833	1.38576	0.0422687
ENSRNOG00000004049	Baiap2	ensembl	235.583	160.136	0.678593	0.0423246
ENSRNOG00000047637	LOC100910401	ensembl	1.34917	6.10533	4.41292	0.0423685
ENSRNOG00000055613	Amy2a3	ensembl	1.22772	5.48175	4.19036	0.0424167
ENSRNOG00000055266	AC123185.3	ensembl	2.65306	9.18595	3.46469	0.0424351
ENSRNOG00000037852	Pirt	ensembl	4.0271	0.670021	0.198388	0.0424381
ENSRNOG00000016913	Stk36	ensembl	226.346	326.281	1.4321	0.0424612
ENSRNOG00000008170	Jph2	ensembl	11.1049	3.74472	0.349305	0.0424838
ENSRNOG00000037356	Dph6	ensembl	91.6341	134.083	1.46159	0.0425431
ENSRNOG00000013323	Rnf217	ensembl_havana	135.638	90.7134	0.66521	0.042565
ENSRNOG00000019433	Rab3a	ensembl	1354.61	961.984	0.706524	0.0427806
ENSRNOG00000061334	SNORD113	ensembl	9.09655	18.4661	1.99941	0.0428327
ENSRNOG00000056780	U1	ensembl	0	3.13786	26.4217	0.0428961
ENSRNOG00000050138	Olr766	ensembl	0	3.13786	26.4217	0.0429101
ENSRNOG00000035623	Mir34a	ensembl	0	3.13786	26.4217	0.0429227
ENSRNOG00000023698	Tex14	ensembl	9.74575	24.8121	2.468	0.0429229
ENSRNOG00000053935	AC123500.1	ensembl	14.576	26.1857	1.7796	0.0429553
ENSRNOG00000056876	AABR07008513.1	ensembl	0	2.63247	21.7836	0.0430011
ENSRNOG00000009206	Fezf2	ensembl	66.6481	42.9948	0.640296	0.0430191
ENSRNOG00000017554	Adam3a	ensembl	0.506786	5.77134	8.53988	0.0430227
ENSRNOG00000006419	Aven	ensembl	96.0845	152.252	1.56941	0.0430716
ENSRNOG00000058158	AABR07024833.1	ensembl	12.0586	4.92621	0.418502	0.0431646
ENSRNOG00000051023	Sap25	ensembl_havana	6.48856	14.2158	2.23653	0.0432516
ENSRNOG00000049504	AABR07009221.1	ensembl	32.1529	57.003	1.7607	0.04334
ENSRNOG00000013195	Ruvbl1	ensembl	877.485	1200.16	1.36223	0.0433573
ENSRNOG00000060589	SNORD53_SNORD92	ensembl	0.329569	4.0284	9.61172	0.0434265
ENSRNOG00000046714	LOC301165	ensembl	0.329569	4.0284	9.61166	0.0434419
ENSRNOG00000052064	Parvg	ensembl	25.0549	48.3783	1.90479	0.0435028
ENSRNOG00000020138	Slc4a3	ensembl	925.112	704.371	0.757428	0.0435837
ENSRNOG00000003833	Nenf	ensembl	433.877	571.272	1.31039	0.0436093
ENSRNOG00000020527	Drap1	ensembl	2149.79	1672.44	0.774147	0.043668
ENSRNOG00000001990	Ugt2b10	ensembl_havana	41.1905	65.5383	1.56613	0.0437676
ENSRNOG00000019264	Ltbr	ensembl	775.605	1027.55	1.31889	0.0438024
ENSRNOG00000012879	Fabp3	ensembl	521.781	718.739	1.37059	0.043825
ENSRNOG00000059976	U2	ensembl	68.1348	120.831	1.7575	0.0439748
ENSRNOG00000061970	Rn60_6_0147.2	havana	43.4595	21.0439	0.481056	0.0440864
ENSRNOG00000051216	Rn50_X_0663.2	havana	24.1006	12.0379	0.496108	0.0440946
ENSRNOG00000058589	AABR07046778.1	ensembl	1275.14	1811.32	1.41457	0.0441591
ENSRNOG00000020093	LOC100360573	ensembl	4149.27	3210.68	0.770542	0.0442275
ENSRNOG00000003863	RGD1564093	ensembl	1669.61	1144.25	0.682499	0.044263
ENSRNOG00000054144	AABR07016731.1	ensembl	2.101	7.72905	3.77496	0.0442656
ENSRNOG00000003305	Cxcr3	ensembl_havana	1.64785	7.93894	4.69551	0.0442708
ENSRNOG00000027522	Slc25a54	ensembl	0.720929	5.09541	6.82169	0.0443883
ENSRNOG00000025418	Armc9	ensembl	757.149	1121.1	1.47322	0.0444284
ENSRNOG00000047843	LOC680367	ensembl	0.329569	4.36696	10.3305	0.0445265
ENSRNOG00000011268	Chd5	ensembl	2516.93	1843.86	0.728923	0.0445313
ENSRNOG00000055849	Lpcat2b	ensembl	3.87475	0.728445	0.204478	0.0445415
ENSRNOG00000019992	Cnbd2	ensembl	5568.03	4291.61	0.767356	0.0445642
ENSRNOG00000001309	Camkk2	ensembl	38.4652	70.2098	1.8025	0.0446223
ENSRNOG00000057498	AABR07063724.1	ensembl	49.8541	77.7559	1.54363	0.0446231
ENSRNOG00000047388	LOC100911926	ensembl	0.690034	5.71173	7.64856	0.044634
ENSRNOG00000000519	Stk38	ensembl_havana	659.182	853.803	1.28988	0.0446358
ENSRNOG00000054690	Metazoa_SRP	ensembl	9.42611	19.7536	2.0696	0.0446392
ENSRNOG00000039721	AC123251.1	ensembl	2.2617	10.0289	4.29073	0.044741
ENSRNOG00000056389	AABR07044001.3	ensembl	0	3.41799	28.7875	0.044796
ENSRNOG00000013192	Olr376	ensembl	0	3.41799	28.7875	0.0448106
ENSRNOG00000037380	AC136661.1	ensembl	41.5339	68.7417	1.65004	0.0448638
ENSRNOG00000012014	Fam160b2	ensembl	397.302	523.6	1.3106	0.0448692
ENSRNOG00000010640	Agtr1b	ensembl	1.0196	5.88228	5.53174	0.0449208
ENSRNOG00000023946	Tmem261	ensembl	444.556	328.506	0.735094	0.0450152
ENSRNOG00000052057	AABR07006727.1	ensembl	41.2941	22.3827	0.544589	0.0450191
ENSRNOG00000017821	Agxt2	ensembl	3.23	9.91439	2.89872	0.0450309
ENSRNOG00000039528	Fam32a	ensembl	1564.45	1182.61	0.753147	0.045036
ENSRNOG00000013247	Olr823	ensembl	0	2.68481	23.1557	0.0450796
ENSRNOG00000024309	Cox6b1	ensembl	1069.25	1384.23	1.28821	0.0450909
ENSRNOG00000041468	Mir1188	ensembl	17.6966	8.95106	0.51619	0.0450962
ENSRNOG00000038297	Plekhd1	ensembl	146.977	216.464	1.46436	0.0451619
ENSRNOG00000049649	Hist1h2ah	ensembl	58.851	34.5147	0.586089	0.0452518
ENSRNOG00000057672	AC118802.1	ensembl	54.7252	85.643	1.55311	0.0452533
ENSRNOG00000025338	Msi2	ensembl	654.574	940.812	1.42992	0.0453234
ENSRNOG00000053895	B3gnt9	ensembl	54.695	86.0925	1.55318	0.0453479
ENSRNOG00000008950	Adi1	ensembl	420.245	580.853	1.37817	0.0453562
ENSRNOG00000009066	Thra	ensembl	2578.17	2050.96	0.791859	0.0454261
ENSRNOG00000017159	Dsc3	ensembl	0.613858	5.15383	7.17049	0.0454358
ENSRNOG00000008759	Csf3r	ensembl	23.0396	39.6746	1.73187	0.0454544
ENSRNOG00000052013	SNORD81	ensembl	35.9961	62.6902	1.7507	0.045501
ENSRNOG00000004255	Usf1	ensembl	1077.31	1390.02	1.28365	0.0455615
ENSRNOG00000056946	Scaf1	ensembl	499.17	365.707	0.728839	0.0455813
ENSRNOG00000023089	LOC102548013	ensembl	1.0505	6.10399	5.72004	0.0456711
ENSRNOG00000049999	AABR07015531.1	ensembl	4.68856	0.727263	0.167937	0.0456969
ENSRNOG00000014505	Pmfbp1	ensembl	59.3323	36.3755	0.608502	0.0457003
ENSRNOG00000059056	AABR07048637.1	ensembl	43.2975	73.9095	1.68925	0.0457859
ENSRNOG00000059679	Rtkn	ensembl	135.099	94.1325	0.692166	0.0458164
ENSRNOG00000045771	Chl1	ensembl	3530.07	2581.28	0.728068	0.0458432
ENSRNOG00000057577	uc_338	ensembl	8.79397	2.35217	0.280851	0.0458964
ENSRNOG00000010452	Cycs	ensembl	2359.72	1868.79	0.788101	0.0460104
ENSRNOG00000003853	Scoc	ensembl	3338.54	2613.14	0.778801	0.0460346
ENSRNOG00000013255	Dnajc8	ensembl	3285.57	2601.02	0.787968	0.0460428
ENSRNOG00000059715	Cc2d2a	ensembl	1511.62	1940.4	1.27746	0.0461153
ENSRNOG00000016712	Lhcgr	ensembl	3.23	9.24082	2.69271	0.0461181
ENSRNOG00000016484	Gstk1	ensembl	351.262	467.248	1.32563	0.046132
ENSRNOG00000025454	Rrm2b	ensembl	299.843	412.308	1.36885	0.0461375
ENSRNOG00000005496	Ing3	ensembl	333.067	249.484	0.745565	0.0461537
ENSRNOG00000037137	Svip	ensembl	1098.52	849.421	0.769826	0.0462135
ENSRNOG00000055417	AABR07070834.1	ensembl	0	4.37051	36.4933	0.0462191
ENSRNOG00000036653	Nps	ensembl	0	4.37051	36.4933	0.046239
ENSRNOG00000011842	Asic5	ensembl	0	4.37051	36.4932	0.0462596
ENSRNOG00000053159	AABR07022162.1	ensembl	1.12064	4.64726	3.5584	0.0463086
ENSRNOG00000038259	RGD1564425	ensembl	42.6038	23.4522	0.541256	0.0463441
ENSRNOG00000019875	Matr3	ensembl	7838.08	6026.38	0.765977	0.0463493
ENSRNOG00000029145	AY172581.2	insdc	961.789	1428.58	1.47816	0.0463603
ENSRNOG00000010188	Satb2	ensembl	57.6612	36.0454	0.619712	0.0464163
ENSRNOG00000052971	AABR07010777.1	ensembl	2.36274	7.49536	3.01971	0.0464438
ENSRNOG00000011824	Trh	ensembl	82.2178	23.2648	0.282465	0.0464934
ENSRNOG00000002833	Gsk3b	ensembl	980.764	700.15	0.709973	0.0466612
ENSRNOG00000056299	AABR07010944.1	ensembl	0.329569	3.80078	9.0488	0.0467408
ENSRNOG00000011253	RGD1304810	ensembl	165.321	118.03	0.71043	0.046806
ENSRNOG00000006206	Tmem106b	ensembl	2155.68	2832.31	1.307	0.0469066
ENSRNOG00000054669	RGD1305110	ensembl	1164.21	1576.11	1.3476	0.0469244
ENSRNOG00000049878	Sytl2	ensembl	137.669	96.4797	0.698267	0.0469623
ENSRNOG00000048176	AABR07024593.2	ensembl	190.609	137.359	0.716699	0.0470013
ENSRNOG00000011107	Pcsk1	ensembl	616.316	463.182	0.748154	0.0470319
ENSRNOG00000016283	Meig1	ensembl	14.1244	29.8342	2.10673	0.0470623
ENSRNOG00000054775	Fkbp11	ensembl	1719.3	1335.86	0.773159	0.0470794
ENSRNOG00000030579	Zfp853	ensembl	103.502	71.5697	0.689638	0.0470888
ENSRNOG00000049942	RGD1564899	ensembl	4.13417	0.784505	0.19965	0.0471412
ENSRNOG00000059477	SNORA17	ensembl	4.30304	10.8574	2.58672	0.0473011
ENSRNOG00000049415	AABR07055413.1	ensembl	0	2.686	23.1306	0.0473175
ENSRNOG00000058574	AABR07009351.1	ensembl	0.360465	4.02959	9.47691	0.0473346
ENSRNOG00000034047	Olr537	ensembl	0	2.686	23.1305	0.0473352
ENSRNOG00000043325	RGD1562234	ensembl	0	2.686	23.1305	0.0473358
ENSRNOG00000000012	Tcf15	ensembl	0.659138	4.41947	6.11365	0.0473516
ENSRNOG00000001439	Srrm3	ensembl	370.062	253.526	0.681716	0.0473836
ENSRNOG00000058918	AABR07070151.1	ensembl	0	2.68363	23.157	0.0473907
ENSRNOG00000030920	Rtn4r	ensembl	92.8064	60.8231	0.653501	0.04742
ENSRNOG00000047206	LOC100911727	ensembl	402.533	284.987	0.703643	0.0475304
ENSRNOG00000061537	AABR07032439.1	ensembl	9.13347	18.6426	2.03689	0.0475439
ENSRNOG00000004921	Nusap1	ensembl	19.8928	36.3958	1.79268	0.0475606
ENSRNOG00000052141	Rps10l1	ensembl	642.188	835.386	1.29383	0.04759
ENSRNOG00000030889	Cldn22	ensembl	52.561	84.4791	1.59392	0.0475955
ENSRNOG00000011463	Psmb2	ensembl	376.964	536.884	1.41878	0.0477869
ENSRNOG00000046028	Haus6	ensembl	147.998	105.716	0.71078	0.0478047
ENSRNOG00000002873	Fam183b	ensembl	1506.46	2020.67	1.33583	0.0478121
ENSRNOG00000031706	RGD1563601	ensembl	5875.06	4347.45	0.736794	0.0478538
ENSRNOG00000000547	Tspyl4	ensembl	2462.35	1901.14	0.768702	0.047857
ENSRNOG00000017786	Acta1	ensembl	117.55	79.3512	0.672921	0.0481426
ENSRNOG00000009173	Smad6	ensembl	43.8183	23.9693	0.545776	0.0481538
ENSRNOG00000011250	Inmt	ensembl	626.154	888.019	1.41044	0.0481807
ENSRNOG00000046737	AABR07003935.3	ensembl	2.60175	0	0.0444234	0.048182
ENSRNOG00000017136	Syt17	ensembl_havana	288.766	214.342	0.740281	0.0482008
ENSRNOG00000000873	Brs3	ensembl	47.1474	29.9985	0.630992	0.0483006
ENSRNOG00000017167	Gm6576	ensembl	0.253393	3.24879	7.86501	0.0483039
ENSRNOG00000051551	AABR07064867.2	ensembl	3.40721	10.1802	2.83219	0.0483232
ENSRNOG00000060810	SNORA55	ensembl	0.582962	3.86394	5.42233	0.048402
ENSRNOG00000029614	Robo1	ensembl	1242.9	927.885	0.742898	0.0484814
ENSRNOG00000052796	AABR07067885.1	ensembl	0.253393	3.24524	7.87571	0.0484899
ENSRNOG00000001396	Mospd3	ensembl	103.614	67.9513	0.65594	0.0485379
ENSRNOG00000021081	Vps72	ensembl	1057.92	818.467	0.770184	0.0485551
ENSRNOG00000029594	AABR07064000.1	ensembl	255.174	373.409	1.45349	0.0485829
ENSRNOG00000002624	Edaradd	ensembl	35.0487	19.643	0.560681	0.0485987
ENSRNOG00000002553	Smim14	ensembl	1050.29	1350.33	1.27988	0.0486383
ENSRNOG00000004630	Rag1	ensembl	0.360465	3.41444	8.14381	0.0486598
ENSRNOG00000019935	Armc5	ensembl	565.297	436.757	0.768988	0.0486782
ENSRNOG00000026592	Rhbdl2	ensembl	33.3546	63.4641	1.8716	0.0487787
ENSRNOG00000014048	Cyld	ensembl	717.933	929.331	1.28828	0.0488019
ENSRNOG00000019106	Rps17	ensembl	137.694	192.562	1.39345	0.0489445
ENSRNOG00000001945	Vcsa2	ensembl	1.0196	4.81173	4.65945	0.0489467
ENSRNOG00000052887	Dnajc6	ensembl	3064.93	2393.24	0.777085	0.0489789
ENSRNOG00000039877	Smim11	ensembl	398.388	521.471	1.30276	0.0490435
ENSRNOG00000022607	Rn60_X_0641.1	havana	255.088	184.738	0.720688	0.0491254
ENSRNOG00000017027	Adam2	ensembl	1.7345	8.45615	4.51139	0.0491685
ENSRNOG00000003597	Tuba4a	ensembl	1734.22	1325.23	0.760432	0.0491815
ENSRNOG00000052650	AABR07065044.1	ensembl	2.18553	0	0.0534444	0.0492113
ENSRNOG00000001559	Mtx2	ensembl	432.127	321.847	0.740515	0.049234
ENSRNOG00000061320	AABR07056556.2	ensembl	410.262	548.787	1.33121	0.0492723
ENSRNOG00000015753	Epn1	ensembl	1808.47	1377.14	0.757855	0.0492951
ENSRNOG00000049187	AABR07069837.1	ensembl	3.59046	10.3017	2.77799	0.0492969
ENSRNOG00000031469	Glb1l3	ensembl	9.94106	18.6378	1.86873	0.0493647
ENSRNOG00000015113	Mocos	ensembl	22.5043	38.4359	1.7068	0.0495423
ENSRNOG00000052760	U2	ensembl	1.84157	6.1006	3.1309	0.0496126
ENSRNOG00000052812	SNORA32	ensembl	0.253393	3.75198	9.00503	0.0496197
ENSRNOG00000028708	Ntsr1	ensembl	22.7097	8.00919	0.35603	0.0496298
ENSRNOG00000016595	Hhex	ensembl	26.2387	14.8323	0.569351	0.0496612
ENSRNOG00000061802	7SK	ensembl	0	2.85772	23.9877	0.0496983
ENSRNOG00000021814	Tnfrsf25	ensembl	4.57081	11.1352	2.4931	0.0497733
ENSRNOG00000002072	Eva1c	ensembl	34.8924	54.5784	1.56369	0.0498463
ENSRNOG00000057045	AABR07069987.1	ensembl	2.93735	8.51119	2.90875	0.049887
ENSRNOG00000058561	Srrm2	ensembl	6941.26	5330.39	0.763743	0.0499462
ENSRNOG00000028386	RGD1564162	ensembl	25.5285	43.9161	1.71124	0.0499499
ENSRNOG00000060126	AC098929.1	ensembl	0.329569	3.188	7.57362	0.0499544
ENSRNOG00000012689	Opn5	ensembl	0.329569	3.188	7.57361	0.0499635
ENSRNOG00000022839	Ifit3	ensembl_havana	236.108	164.896	0.69605	0.0500941
ENSRNOG00000019295	Rab12	ensembl	459.851	347.317	0.752195	0.050127
ENSRNOG00000047123	Tstd1	ensembl	24.6323	41.3103	1.67087	0.0501948
ENSRNOG00000010186	Cdv3	ensembl	1456.83	1096.99	0.750065	0.0502362
ENSRNOG00000012283	Chrna6	ensembl	11.8872	2.2414	0.194003	0.050301
ENSRNOG00000012858	Odf3	ensembl	8.89891	17.5767	1.91675	0.0503924
ENSRNOG00000010274	Smc4	ensembl	1521.67	1164.38	0.762473	0.050395
ENSRNOG00000007219	LOC103692716	ensembl	24576.4	18775.9	0.761076	0.0504403
ENSRNOG00000002094	Atg3	ensembl	851.663	617.016	0.719872	0.0504485
ENSRNOG00000005984	Etv6	ensembl	163.33	235.741	1.43212	0.0504804
ENSRNOG00000018782	Gmnn	ensembl	116.076	71.6534	0.612092	0.0505577
ENSRNOG00000058730	AABR07032747.1	ensembl	34.5257	56.6838	1.64781	0.0505702
ENSRNOG00000008378	Zfp414	ensembl	136.569	90.0418	0.659717	0.0505941
ENSRNOG00000057077	U2	ensembl	64.554	107.876	1.66048	0.0506166
ENSRNOG00000014689	Zbtb4	ensembl	956.405	750.459	0.781069	0.0506767
ENSRNOG00000004700	Nxt1	ensembl	51.8785	77.6868	1.49517	0.0507148
ENSRNOG00000052620	Gnb2l1	ensembl	1370.69	1867.14	1.35675	0.0508754
ENSRNOG00000014477	Acvr2b	ensembl	26.9288	15.165	0.567836	0.050889
ENSRNOG00000010894	Tmem203	ensembl	59.7872	91.0538	1.51417	0.0509056
ENSRNOG00000035651	Mir3582	ensembl	0.720929	5.65939	7.38502	0.0509628
ENSRNOG00000018992	Dpysl3	ensembl	391.742	561.017	1.42269	0.0511053
ENSRNOG00000049629	Reep2	ensembl	746.355	553.131	0.737929	0.0511082
ENSRNOG00000006532	H3f3a	ensembl	6475.7	5187.16	0.797443	0.0511317
ENSRNOG00000019900	Slc35b2	ensembl	96.791	147.805	1.5252	0.051193
ENSRNOG00000021553	Nckap5	ensembl	624.21	856.127	1.36433	0.0512871
ENSRNOG00000031993	Prim1	ensembl	413.603	299.982	0.722011	0.0514429
ENSRNOG00000059220	AABR07035486.1	ensembl	0.506786	3.97132	5.79753	0.0514561
ENSRNOG00000012031	St8sia2	ensembl_havana	14.1786	30.6386	2.11164	0.0514939
ENSRNOG00000057153	Pla1a	ensembl	112.185	157.166	1.39181	0.0514988
ENSRNOG00000004322	Sh3kbp1	ensembl	1035.37	803.337	0.772132	0.0515255
ENSRNOG00000058902	AABR07072264.3	ensembl	0.943427	5.20989	5.061	0.0516806
ENSRNOG00000033263	Olr1069	ensembl	0	2.57759	21.5223	0.0517244
ENSRNOG00000007468	Ifng	ensembl	0	2.57759	21.5223	0.0517401
ENSRNOG00000007926	Map2k5	ensembl	157.108	220.207	1.39541	0.0517843
ENSRNOG00000054637	AC115371.3	ensembl	1.45021	5.37689	3.31972	0.051806
ENSRNOG00000015205	Cyb5a	ensembl	1806.1	2283.3	1.25799	0.0518714
ENSRNOG00000025300	Fer1l6	ensembl	10.6144	25.0912	2.38429	0.0518914
ENSRNOG00000013223	Fah	ensembl	452.304	596.384	1.31143	0.0518957
ENSRNOG00000035472	Mir204	ensembl	65.5068	119.228	1.81249	0.0519056
ENSRNOG00000061060	7SK	ensembl	0	2.57404	21.564	0.0519099
ENSRNOG00000019813	Ppp4c	ensembl	241.501	345.733	1.423	0.0519335
ENSRNOG00000060742	AABR07029809.1	ensembl	38.6417	62.3623	1.59892	0.0519428
ENSRNOG00000016029	Rb1	ensembl	385.564	512.308	1.32365	0.0520259
ENSRNOG00000012844	Tox4	ensembl	1084.98	849.377	0.7795	0.0520358
ENSRNOG00000014984	Dmwd	ensembl	264.678	196.221	0.737013	0.0520681
ENSRNOG00000046109	LOC689574	ensembl	198.766	290.965	1.45901	0.0520762
ENSRNOG00000032374	Paqr9	ensembl	91.8955	56.6159	0.61498	0.0522498
ENSRNOG00000013426	Mrgprf	ensembl	50.8442	32.6905	0.64057	0.0522936
ENSRNOG00000047756	Mef2a	ensembl	2877.21	2282.27	0.789735	0.0523092
ENSRNOG00000015974	Tmem208	ensembl	675.586	884.816	1.30347	0.0523107
ENSRNOG00000030771	Dgkb	ensembl	2356.26	1752.55	0.740262	0.0523249
ENSRNOG00000006649	Thrb	ensembl	343.163	243.2	0.704965	0.0524629
ENSRNOG00000056555	AABR07054983.1	ensembl	7.58222	1.34477	0.195316	0.0524644
ENSRNOG00000005034	Arhgef25	ensembl	994.983	1280.73	1.28043	0.052474
ENSRNOG00000010004	Ripply2	ensembl	20.9223	10.1266	0.486401	0.0524759
ENSRNOG00000012089	Cstf3	ensembl_havana	1020.68	1365.51	1.33119	0.052496
ENSRNOG00000008489	Ppih	ensembl	6.80395	17.4025	2.49682	0.0525101
ENSRNOG00000019435	Psd	ensembl	414.574	307.618	0.739364	0.0525125
ENSRNOG00000059002	AABR07050466.1	ensembl	2.68628	0	0.0421498	0.0525559
ENSRNOG00000021006	Tmem147	ensembl	281.596	400.706	1.41642	0.0526534
ENSRNOG00000061551	SNORA17	ensembl	2.43289	0	0.0463	0.0526821
ENSRNOG00000042851	AC109942.1	ensembl	48.4982	29.7197	0.607782	0.0528563
ENSRNOG00000052945	AABR07002969.1	ensembl	54.5367	92.8489	1.7096	0.0528934
ENSRNOG00000012060	Gucy1b3	ensembl	1932.01	1461.95	0.753508	0.0529108
ENSRNOG00000043419	Hist3h2ba	ensembl	82.5239	116.64	1.40708	0.0529217
ENSRNOG00000017704	Sema3f	ensembl	124.064	85.3995	0.686982	0.0529393
ENSRNOG00000013030	Pip4k2b	ensembl	436.195	322.891	0.738445	0.0530468
ENSRNOG00000015768	Cml5	ensembl	103.939	154.185	1.47511	0.0531191
ENSRNOG00000005970	Lrrc1	ensembl	518.37	668.895	1.28428	0.053145
ENSRNOG00000016534	Fam171a1	ensembl	684.987	515.933	0.750096	0.0532776
ENSRNOG00000057086	LOC102549803	ensembl	15.4493	26.4717	1.71231	0.0534318
ENSRNOG00000025693	Tdrd6	ensembl	0.329569	4.03077	9.57018	0.0535507
ENSRNOG00000059765	Asic1	ensembl	539.246	381.523	0.703774	0.0535612
ENSRNOG00000050983	Hpcal4	ensembl	1107.16	846.772	0.761507	0.0536574
ENSRNOG00000059140	Myo1g	ensembl	20.1023	33.8575	1.70154	0.0536856
ENSRNOG00000029415	RGD1565784	ensembl	405.412	306.055	0.751037	0.0537576
ENSRNOG00000020839	Lrfn3	ensembl	21.9728	11.3022	0.514496	0.0538718
ENSRNOG00000032004	Cyp2b21	ensembl	0.360465	4.03077	9.44234	0.053906
ENSRNOG00000021887	Cyb561d2	ensembl	280.091	378.792	1.34555	0.0539467
ENSRNOG00000019492	Pomgnt2	ensembl	264.552	194.5	0.732266	0.0539719
ENSRNOG00000017940	Rere	ensembl	2912.26	2160.09	0.738737	0.0539944
ENSRNOG00000042391	Serpina9	ensembl	0	4.03432	33.778	0.0540309
ENSRNOG00000051147	Rn50_2_1765.1	havana	52.6603	31.967	0.597462	0.054033
ENSRNOG00000055418	SNORA44	ensembl	3.23	9.85022	2.85778	0.0540873
ENSRNOG00000001476	Cldn4	ensembl	3.85824	0.671203	0.202341	0.0541052
ENSRNOG00000058924	U6	ensembl	2.21039	0	0.0506369	0.0542681
ENSRNOG00000028581	Ccdc138	ensembl	538.467	748.137	1.38176	0.0542687
ENSRNOG00000012964	Ccr6	ensembl	3.59649	10.0216	2.82314	0.0542885
ENSRNOG00000061468	AABR07042825.1	ensembl	21.0608	37.2199	1.72847	0.0544628
ENSRNOG00000048562	Polr2l	ensembl	99.3541	155.094	1.5527	0.0544678
ENSRNOG00000051208	Selv	ensembl_havana	19.2952	9.00358	0.472612	0.0545802
ENSRNOG00000033913	AABR07053734.1	ensembl	53.0182	79.4336	1.48271	0.0546263
ENSRNOG00000055138	Cldn16	ensembl	0	2.68718	23.0822	0.0547933
ENSRNOG00000053810	AABR07063741.1	ensembl	0	2.68718	23.0821	0.0548115
ENSRNOG00000045868	RGD1559588	ensembl	8.54428	2.79811	0.3455	0.0548158
ENSRNOG00000042427	Gskip	ensembl	730.436	563.722	0.768762	0.0548175
ENSRNOG00000043159	Vom2r42	ensembl	0	2.68718	23.0821	0.0548205
ENSRNOG00000037428	Zfp605	ensembl	613.403	452.343	0.733815	0.0548214
ENSRNOG00000038909	Pou3f3	ensembl	640.39	428.769	0.666125	0.0548231
ENSRNOG00000033423	RGD1562540	ensembl	0	2.68718	23.082	0.0548364
ENSRNOG00000005905	Pde4b	ensembl	899.969	707.119	0.781619	0.0548553
ENSRNOG00000048741	LOC690288	ensembl	33.0413	58.4011	1.73539	0.0548734
ENSRNOG00000054324	SNORD39	ensembl	0	2.68245	23.1376	0.0548805
ENSRNOG00000060502	SNORD96	ensembl	3.87242	10.2411	2.76335	0.054893
ENSRNOG00000007077	Fem1b	ensembl	2628.17	2100.49	0.795528	0.054969
ENSRNOG00000010701	Depdc1b	ensembl	4.38757	10.3531	2.36337	0.054979
ENSRNOG00000018986	Fbxl19	ensembl	284.883	205.564	0.718715	0.0549899
ENSRNOG00000022256	Cxcl10	ensembl	32.0981	11.8017	0.372929	0.0550976
ENSRNOG00000050795	AABR07008016.1	ensembl	105.046	68.5963	0.651382	0.0551058
ENSRNOG00000011500	Pou2af1	ensembl	4.52553	1.0074	0.256133	0.0551203
ENSRNOG00000002412	Mapk7	ensembl	38.0093	58.3265	1.52959	0.05517
ENSRNOG00000033186	AC097037.2	ensembl	32.1641	53.7869	1.63809	0.0551788
ENSRNOG00000030442	LOC100362583	ensembl	1522.15	1932.74	1.2634	0.0552277
ENSRNOG00000026884	Snx17	ensembl	444.622	578.542	1.29538	0.0552416
ENSRNOG00000018394	Chrdl2	ensembl	0.329569	3.69103	8.84887	0.055289
ENSRNOG00000047912	AABR07055353.1	ensembl	3.98785	0.671203	0.205321	0.0552929
ENSRNOG00000049771	Gstt1	ensembl	57.1423	95.5136	1.65719	0.0553179
ENSRNOG00000014940	Sfrp5	ensembl	84.2433	139.214	1.64735	0.0553428
ENSRNOG00000052338	SNORA2	ensembl	3.48942	9.74503	2.76749	0.055345
ENSRNOG00000018406	Wipf1	ensembl	373.718	277.185	0.738279	0.0554057
ENSRNOG00000043492	Olr556	ensembl	0	3.02455	25.7336	0.0554164
ENSRNOG00000027976	Il22ra1	ensembl	0.360465	3.69221	8.74203	0.055613
ENSRNOG00000056174	Pdzd4	ensembl	1277.74	953.279	0.742825	0.0557163
ENSRNOG00000054398	AABR07053198.1	ensembl	10.7549	23.1872	2.10954	0.0557367
ENSRNOG00000058125	AABR07055539.1	ensembl	0	3.0818	26.0603	0.055745
ENSRNOG00000055434	AABR07026641.1	ensembl	0	3.0818	26.0602	0.0557672
ENSRNOG00000007759	Foxd2	ensembl	11.3604	4.92857	0.437706	0.0557686
ENSRNOG00000018028	Testin	ensembl	0	3.0818	26.0602	0.0557825
ENSRNOG00000017780	Akr7a2	ensembl	170.485	246.841	1.44552	0.055851
ENSRNOG00000055051	Olr1249	ensembl	0	2.80166	23.6758	0.0560703
ENSRNOG00000053772	Klra22	ensembl	0	2.80166	23.6758	0.0560906
ENSRNOG00000030159	Senp17	ensembl	0	2.80166	23.6758	0.0561099
ENSRNOG00000022354	Pusl1	ensembl	133.313	92.9798	0.692735	0.056137
ENSRNOG00000049370	Lsm6	ensembl	159.056	228.221	1.42139	0.0561708
ENSRNOG00000001049	Tpt1	ensembl	938.97	1225.79	1.29952	0.0562471
ENSRNOG00000011937	Sgtb	ensembl	657.316	506.039	0.766113	0.0562514
ENSRNOG00000042222	LOC678817	ensembl	1.0505	4.81409	4.61562	0.0562611
ENSRNOG00000054315	SNORD27	ensembl	65.5387	42.581	0.646366	0.0564088
ENSRNOG00000057599	SNORA35	ensembl	26.3382	53.9982	2.02298	0.0564163
ENSRNOG00000057569	Ahnak	ensembl	21157.6	16199.2	0.761986	0.0564284
ENSRNOG00000057641	AC133613.1	ensembl	16.199	7.88643	0.498435	0.0564556
ENSRNOG00000034233	Fyttd1	ensembl	1423.19	1063.93	0.743203	0.0564958
ENSRNOG00000059252	AABR07057108.1	ensembl	34.4251	53.1763	1.53182	0.056501
ENSRNOG00000038375	AABR07026311.1	ensembl	1679.24	1294.24	0.767696	0.0565249
ENSRNOG00000058262	AABR07057247.1	ensembl	4.52553	1.1207	0.261329	0.0566351
ENSRNOG00000037298	RGD1309036	ensembl	48.9659	28.6527	0.579904	0.056654
ENSRNOG00000051548	Lmod1	ensembl	820.19	601.666	0.730967	0.0566599
ENSRNOG00000016206	Uvrag	ensembl	1333.01	979.964	0.732508	0.0568271
ENSRNOG00000011078	Srm	ensembl	71.9558	45.4486	0.627879	0.0568354
ENSRNOG00000050978	LOC100911295	ensembl	627.008	465.529	0.739863	0.0568436
ENSRNOG00000004629	Fkbp3	ensembl_havana	6144.13	4693.68	0.760776	0.0569115
ENSRNOG00000018111	Slc12a5	ensembl	572.98	373.427	0.649244	0.0569122
ENSRNOG00000049178	AABR07028414.1	ensembl	26.5562	44.1226	1.64776	0.0571827
ENSRNOG00000029273	E2f3	ensembl_havana	133.005	186.093	1.39455	0.0571838
ENSRNOG00000012406	Pcbp4	ensembl	823.074	627.877	0.759832	0.0572649
ENSRNOG00000010580	Acot7	ensembl	610.291	455.749	0.742601	0.0572815
ENSRNOG00000009922	Prlhr	ensembl	75.0606	110.813	1.47524	0.057301
ENSRNOG00000001300	P2rx4	ensembl	629.407	486.477	0.768679	0.0573034
ENSRNOG00000052190	AABR07072602.1	ensembl	3.84988	9.79991	2.54844	0.0574084
ENSRNOG00000003195	Caskin1	ensembl	829.068	623.613	0.748011	0.0574496
ENSRNOG00000054563	RGD1563348	ensembl	291.3	202.732	0.693324	0.057476
ENSRNOG00000012512	Nexn	ensembl	363.333	255.207	0.698874	0.0575249
ENSRNOG00000055846	AABR07013065.1	ensembl	0.690034	3.52538	4.84466	0.0575872
ENSRNOG00000022769	Sp100	ensembl	98.5031	157.125	1.58838	0.0576027
ENSRNOG00000039091	Pnpla8	ensembl	6179.48	4864.4	0.783567	0.0576107
ENSRNOG00000023194	Rn50_6_0657.1	havana	1.45021	4.9799	3.08702	0.0576733
ENSRNOG00000001973	Ugt2a1	ensembl	15.5256	31.6972	2.00259	0.0577094
ENSRNOG00000012852	Bin1	ensembl	1936.93	2500.09	1.28499	0.0577828
ENSRNOG00000028005	Ccdc54	ensembl	0.253393	3.69339	9.22559	0.057841
ENSRNOG00000058637	AABR07003304.2	ensembl	42.3337	64.8181	1.50974	0.0579555
ENSRNOG00000042025	Lrrc37a	ensembl	20.3708	37.067	1.78348	0.0579897
ENSRNOG00000050703	Fam115c	ensembl	34.4544	54.0204	1.54297	0.0580449
ENSRNOG00000049586	Mir6331	ensembl	3.06716	8.84266	2.78102	0.0580725
ENSRNOG00000018522	Echs1	ensembl	254.132	354.03	1.38473	0.0581101
ENSRNOG00000018528	Nrl	ensembl	2.69834	0	0.044415	0.0581224
ENSRNOG00000031974	Pcdh10	ensembl	1499.78	1047.79	0.69485	0.0581728
ENSRNOG00000023386	LOC103690018	ensembl	155.866	105.902	0.677427	0.0581835
ENSRNOG00000002812	Lhx1	ensembl	32.2277	53.3384	1.62567	0.058186
ENSRNOG00000015430	Nlgn2	ensembl_havana	417.216	315.271	0.752686	0.058295
ENSRNOG00000047450	Lmo3	ensembl	437.017	308.854	0.704572	0.0583862
ENSRNOG00000028448	Elovl1	ensembl	525.423	681.918	1.29175	0.0584373
ENSRNOG00000026661	Hcar1	ensembl	66.6928	43.0294	0.646481	0.0585222
ENSRNOG00000005112	AABR07006367.1	ensembl	3.33104	0.336193	0.131877	0.0585936
ENSRNOG00000052161	SNORD5	ensembl	25.6989	13.1559	0.518119	0.0586249
ENSRNOG00000045840	LOC100912489	ensembl	104.465	158.795	1.51342	0.0586336
ENSRNOG00000022614	AABR07068253.1	ensembl	4.8077	13.0821	2.7249	0.0586757
ENSRNOG00000050242	Mirlet7g	ensembl	3.02188	8.17382	2.5817	0.0587105
ENSRNOG00000016628	Scgn	ensembl	76.8879	27.2287	0.354237	0.0587368
ENSRNOG00000020421	Fndc7	ensembl	190.797	264.322	1.37789	0.0588361
ENSRNOG00000033776	LOC100359668	ensembl	31.3103	48.3633	1.54431	0.058916
ENSRNOG00000037838	RGD1560455	ensembl	14.003	26.0869	1.8601	0.0589444
ENSRNOG00000057428	U6	ensembl	2.18553	10.2485	4.43303	0.0589524
ENSRNOG00000019219	Vamp1	ensembl	1372.27	888.924	0.643589	0.0590098
ENSRNOG00000052007	pRNA	ensembl	1.30389	6.1028	4.54332	0.0590538
ENSRNOG00000016783	Fshr	ensembl	0.360465	3.68984	8.73541	0.0590641
ENSRNOG00000050701	AABR07007385.1	ensembl	15.2474	30.2023	1.96438	0.0591102
ENSRNOG00000012886	Maff	ensembl	25.6114	48.9306	1.88742	0.0591454
ENSRNOG00000059321	snoU2_19	ensembl	17.0233	8.73425	0.500375	0.0591876
ENSRNOG00000014575	Rtcd1	ensembl	1854.97	1468.29	0.787779	0.0592397
ENSRNOG00000032684	Ccdc60	ensembl	190.684	264.241	1.37689	0.0592415
ENSRNOG00000012807	C1qa	ensembl	741.536	961.524	1.29033	0.0592543
ENSRNOG00000008569	Ndufa6	ensembl	1521.43	1199.16	0.784301	0.0592679
ENSRNOG00000005825	Lyz2	ensembl	4320.95	5498.53	1.26713	0.059268
ENSRNOG00000057359	AABR07032843.1	ensembl	0.253393	3.47287	8.55463	0.0592848
ENSRNOG00000045863	Naa16	ensembl	731.772	946.264	1.2883	0.0593298
ENSRNOG00000022844	Pdzrn4	ensembl	185.593	116.543	0.625114	0.0593498
ENSRNOG00000042213	Zfp498	ensembl_havana	18.3143	32.2468	1.76353	0.0593672
ENSRNOG00000055171	AABR07048040.1	ensembl	27.2412	13.2013	0.481267	0.0595432
ENSRNOG00000046601	Unc5cl	ensembl_havana	7.671	17.5789	2.30924	0.0596147
ENSRNOG00000001797	Umps	ensembl	735.201	577.163	0.781495	0.0596967
ENSRNOG00000058516	AABR07071392.1	ensembl	3.8046	0.671203	0.212031	0.0597266
ENSRNOG00000017871	Sidt2	ensembl	365.14	512.423	1.39873	0.0597608
ENSRNOG00000018094	Sv2c	ensembl	147.134	54.3006	0.367449	0.059766
ENSRNOG00000030021	Ccl6	ensembl_havana	54.6494	82.7441	1.50536	0.0598256
ENSRNOG00000050952	Olr650	ensembl	0	2.63365	21.8659	0.0598594
ENSRNOG00000004962	Prdm4	ensembl	615.706	476.524	0.769952	0.059904
ENSRNOG00000015840	Hsd17b4	ensembl	2976.24	3769.03	1.26109	0.0599123
ENSRNOG00000054557	Lsm14b	ensembl	1027.15	798.841	0.774478	0.0600173
ENSRNOG00000035550	Mir125b1	ensembl	23.1286	38.5154	1.6591	0.0600904
ENSRNOG00000043304	Apcdd1	ensembl	833.153	637.448	0.762039	0.0600916
ENSRNOG00000050430	Vav1	ensembl	44.2301	26.8723	0.609575	0.0601002
ENSRNOG00000009615	Mtor	ensembl	1752.12	1385.12	0.786733	0.0602968
ENSRNOG00000001418	Znhit1	ensembl	150.93	216.636	1.43131	0.0603305
ENSRNOG00000012752	Cklf	ensembl	9.07984	19.258	2.12079	0.0603334
ENSRNOG00000004449	E2f6	ensembl	676.755	511.839	0.753426	0.0603675
ENSRNOG00000032192	Cfap97	ensembl	960.863	753.545	0.780796	0.0603878
ENSRNOG00000008716	Nefh	ensembl	2745.85	2020.49	0.732388	0.060453
ENSRNOG00000042847	LOC687707	ensembl	4.86346	1.34359	0.30172	0.0605631
ENSRNOG00000060157	SNORA66	ensembl	5.14775	11.4238	2.14905	0.0606934
ENSRNOG00000019129	Fcgbp	ensembl	77.1188	113.753	1.46801	0.0607672
ENSRNOG00000058168	7SK	ensembl	1.88685	6.49167	3.29134	0.0608129
ENSRNOG00000059338	LOC102549714	ensembl	92.3421	130.473	1.40184	0.060842
ENSRNOG00000008697	Nov	ensembl	269.356	181.215	0.66929	0.0609518
ENSRNOG00000001410	Gigyf1	ensembl	592.504	454.203	0.76264	0.0609748
ENSRNOG00000013636	Ppil3	ensembl	134.348	206.39	1.52556	0.0609807
ENSRNOG00000059010	Rnf212	ensembl	16.8995	8.67803	0.519015	0.0610033
ENSRNOG00000037165	Nipal3	ensembl	226.16	167.964	0.739119	0.0610617
ENSRNOG00000051880	AABR07021996.1	ensembl	98.8441	141.904	1.42811	0.061098
ENSRNOG00000049024	AABR07051611.1	ensembl	0.329569	3.13194	7.51761	0.0611296
ENSRNOG00000052667	LOC689728	havana	896.542	694.911	0.772263	0.0611892
ENSRNOG00000019751	Cyb5r2	ensembl	440.302	609.329	1.37699	0.061358
ENSRNOG00000019035	Trpm8	ensembl	1.52639	6.66678	4.07566	0.0614014
ENSRNOG00000011251	Hcrtr2	ensembl	74.8982	44.2548	0.588828	0.0614357
ENSRNOG00000015992	Ccl20	ensembl	0.253393	3.63631	8.89085	0.0614622
ENSRNOG00000011360	Dkk2	ensembl	107.198	64.5297	0.599611	0.0614806
ENSRNOG00000003163	Sdhc	ensembl	3084.08	3891.12	1.25536	0.0614821
ENSRNOG00000004262	LOC102546716	ensembl	1806.07	1423.05	0.784765	0.0615012
ENSRNOG00000021151	Ppp1r14b	ensembl	234.498	176.005	0.746742	0.0616581
ENSRNOG00000001143	Cit	ensembl	1122.98	767.553	0.680219	0.0617353
ENSRNOG00000049326	Tmem234	ensembl	141.314	101.07	0.710663	0.0617487
ENSRNOG00000060267	SNORD14	ensembl	31.9986	53.46	1.66533	0.0617764
ENSRNOG00000010048	Dctn1	ensembl	4741.29	3713.65	0.779509	0.0617775
ENSRNOG00000001873	P2rx6	ensembl	1050.75	1448.71	1.3726	0.061856
ENSRNOG00000061248	SNORD113	ensembl	401.155	284.347	0.706223	0.0618634
ENSRNOG00000020045	Drgx	ensembl	1.70361	6.27335	3.34023	0.0619393
ENSRNOG00000011165	Dydc1	ensembl	7.05714	15.3259	2.19845	0.0619676
ENSRNOG00000029321	Ccser1	ensembl	375.008	285.98	0.758363	0.0620327
ENSRNOG00000062071	Rn60_1_1883.1	havana	72.8273	105.856	1.44932	0.0620949
ENSRNOG00000048048	Olr1737	ensembl_havana	3.21561	12.7736	3.75158	0.0621029
ENSRNOG00000017852	Nars	ensembl	6807.95	5344.82	0.781727	0.0621751
ENSRNOG00000050485	Gas1	ensembl	44.2461	26.0854	0.594015	0.0621773
ENSRNOG00000028373	LOC691044	ensembl	1.52639	6.43663	3.99339	0.0621835
ENSRNOG00000054138	AABR07018438.1	ensembl	0.582962	4.87488	6.83747	0.0622105
ENSRNOG00000054466	AABR07001207.1	ensembl	11.4983	20.2008	1.76049	0.0622113
ENSRNOG00000004341	LOC498222	ensembl	3.40489	9.01067	2.75059	0.0622666
ENSRNOG00000020879	Nags	ensembl	5.59042	13.2039	2.38815	0.0623056
ENSRNOG00000056874	AABR07026565.1	ensembl	12.6153	4.69606	0.380573	0.0623197
ENSRNOG00000058276	AABR07043200.1	ensembl	2.06407	6.54165	2.99539	0.0623201
ENSRNOG00000001469	Eln	ensembl	185.164	125.552	0.674719	0.0624514
ENSRNOG00000024967	Uqcrb	ensembl	477.616	623.827	1.30087	0.0624521
ENSRNOG00000018909	Arv1	ensembl	77.1706	53.2346	0.685137	0.0624882
ENSRNOG00000006397	Chrm5	ensembl	53.7645	31.3385	0.583174	0.0625021
ENSRNOG00000061076	7SK	ensembl	0.360465	3.64223	8.37076	0.0625029
ENSRNOG00000001173	Cabp1	ensembl	264.699	178.981	0.673726	0.0626478
ENSRNOG00000056518	SNORA71	ensembl	12.9713	24.4988	1.86306	0.0627081
ENSRNOG00000003787	Lcorl	ensembl	192.013	134.069	0.697143	0.0628068
ENSRNOG00000004425	Klhdc1	ensembl	493.248	382.494	0.771953	0.0630629
ENSRNOG00000049853	Rgag1	ensembl	34.8248	22.0548	0.627381	0.0631229
ENSRNOG00000025637	Saxo1	ensembl	3.95325	0.392252	0.114882	0.0631653
ENSRNOG00000045691	AABR07058795.1	ensembl	30.6883	48.1414	1.5632	0.0632635
ENSRNOG00000061920	AABR07051321.1	ensembl	0.360465	3.07707	7.39042	0.0632726
ENSRNOG00000010208	Timp1	ensembl	75.1438	123.955	1.63525	0.0633313
ENSRNOG00000029835	RGD1562381	ensembl	0.506786	3.74354	5.57323	0.0633339
ENSRNOG00000060102	AABR07047586.1	ensembl	2.4842	0	0.0470466	0.0633573
ENSRNOG00000051553	AABR07001594.1	ensembl	48.435	29.6076	0.603639	0.0634054
ENSRNOG00000047023	Aldh1l1	ensembl	635.415	491.074	0.769863	0.0634951
ENSRNOG00000054993	AABR07024856.1	ensembl	1.49549	5.20753	3.2339	0.0635201
ENSRNOG00000005697	Slc6a11	ensembl	1196.26	906.955	0.754255	0.0635409
ENSRNOG00000030914	Lexm	ensembl	19.2154	6.38799	0.327143	0.0635603
ENSRNOG00000020066	Pcdhb11	ensembl	126.7	88.212	0.692541	0.0635622
ENSRNOG00000027908	Actrt3	ensembl	5.20741	1.45453	0.287709	0.0635709
ENSRNOG00000011182	Aanat	ensembl	2.93735	0.392252	0.160608	0.0636621
ENSRNOG00000005703	Arfgef1	ensembl	3226.94	2548.17	0.785469	0.0636985
ENSRNOG00000057137	AABR07005752.1	ensembl	220.185	156.784	0.707536	0.0637069
ENSRNOG00000046393	Fau	ensembl	603.83	769.267	1.26807	0.0637308
ENSRNOG00000016021	Lims2	ensembl	228.051	164.702	0.718696	0.0637506
ENSRNOG00000018998	Yipf3	ensembl	720.97	563.329	0.778316	0.0637717
ENSRNOG00000019351	LOC100911881	ensembl	158.803	227.826	1.42501	0.0637778
ENSRNOG00000013548	Sepw1	ensembl	118.846	63.0363	0.529321	0.0637954
ENSRNOG00000035524	Mir99a	ensembl	23.2034	39.74	1.67272	0.0638065
ENSRNOG00000052182	U6	ensembl	1.30389	4.81173	3.63584	0.0638144
ENSRNOG00000017085	Tubgcp3	ensembl	790.02	624.624	0.786899	0.0638191
ENSRNOG00000056883	U7	ensembl	0.659138	4.19303	5.73196	0.063848
ENSRNOG00000007743	Mgst1	ensembl	467.902	669.208	1.42403	0.0638807
ENSRNOG00000004763	Sirpa	ensembl	2092.83	1626.99	0.773609	0.063996
ENSRNOG00000011231	Cntnap4	ensembl	288.319	160.945	0.555412	0.0640596
ENSRNOG00000033141	AC123280.1	ensembl	77.587	112.906	1.4404	0.0640689
ENSRNOG00000001720	Hes1	ensembl	721.79	928.112	1.28091	0.0641641
ENSRNOG00000032820	AABR07061614.1	ensembl	21.287	10.3639	0.484599	0.0641662
ENSRNOG00000061376	Psca	ensembl_havana	15.5109	30.1033	1.95932	0.0642045
ENSRNOG00000049615	Fam228b	ensembl	41.5856	62.6915	1.48909	0.0642115
ENSRNOG00000000702	Sart3	ensembl	926.917	723.985	0.777505	0.0642422
ENSRNOG00000015603	Prkce	ensembl	581.045	436.285	0.7479	0.0643478
ENSRNOG00000007017	Tmc2	ensembl	1.16592	4.19895	3.22524	0.0644839
ENSRNOG00000004252	Eif3h	ensembl	1228.9	1554.06	1.25929	0.0645294
ENSRNOG00000049443	Vom2r77	ensembl	1.45021	5.09439	3.12467	0.0645719
ENSRNOG00000060130	Ypel4	ensembl	475.24	361.165	0.756239	0.0646021
ENSRNOG00000020294	Scgb1d2	ensembl	1.34314	5.76188	3.74628	0.0646518
ENSRNOG00000032429	Tmprss9	ensembl	18.3437	9.11569	0.497172	0.0646591
ENSRNOG00000020261	Fam53c	ensembl	424.66	327.71	0.767624	0.0647507
ENSRNOG00000016284	Dmrt3	ensembl	11.5457	23.9644	2.07283	0.0647729
ENSRNOG00000024213	Golim4	ensembl	2304.53	1816.96	0.785086	0.0647795
ENSRNOG00000033520	RGD1562063	ensembl	9.65889	18.8619	1.95308	0.0648294
ENSRNOG00000056440	AABR07028137.1	ensembl	0	3.69812	31.0594	0.0648488
ENSRNOG00000055285	LOC102551439	ensembl	0	3.69812	31.0593	0.0648741
ENSRNOG00000048663	AABR07002093.1	ensembl	0	3.69812	31.0593	0.0648999
ENSRNOG00000017286	Ephx2	ensembl	358.819	466.38	1.29369	0.0649146
ENSRNOG00000046104	Rn50_9_0077.1	havana	0	3.69812	31.0592	0.0649245
ENSRNOG00000032092	Olr285	ensembl	0	3.69812	31.0591	0.0649507
ENSRNOG00000026376	RGD1560860	ensembl	0	3.69812	31.0591	0.0649771
ENSRNOG00000012790	Lrit1	ensembl	1.93213	6.49033	3.32905	0.0649961
ENSRNOG00000018610	Pde6d	ensembl	216.359	161.685	0.743776	0.0649968
ENSRNOG00000017531	Akr1c3	ensembl	0	3.69812	31.059	0.0649995
ENSRNOG00000000978	Cyp3a2	havana	0	3.69812	31.059	0.0650232
ENSRNOG00000019983	Mlx	ensembl	868.962	1125.44	1.28822	0.0650433
ENSRNOG00000004155	Samd14	ensembl	82.2304	122.349	1.48232	0.0651097
ENSRNOG00000061270	Git1	ensembl	831.191	643.029	0.770267	0.0651287
ENSRNOG00000036830	RGD1563200	ensembl	80.8541	140.059	1.71724	0.0651567
ENSRNOG00000054491	U2	ensembl	8.42302	16.4527	1.89816	0.0652089
ENSRNOG00000019031	Neu4	ensembl	20.8421	34.0221	1.63357	0.0652133
ENSRNOG00000056115	SNORD113	ensembl	840.423	587.567	0.696524	0.0652225
ENSRNOG00000048758	Snrpd2l	ensembl	226.334	313.885	1.38326	0.0652999
ENSRNOG00000045749	LOC100361879	ensembl	44.6652	72.9585	1.62166	0.06531
ENSRNOG00000036911	Bicd1	ensembl	2147.54	1656.56	0.767639	0.0653168
ENSRNOG00000028504	Socs5	ensembl	1263.09	1004.52	0.79186	0.0653632
ENSRNOG00000004710	Rbks	ensembl	93.6105	136.723	1.44978	0.0654574
ENSRNOG00000016346	Prkcd	ensembl	759.178	1156.63	1.51776	0.0654805
ENSRNOG00000020010	Kctd13	ensembl	475.244	365.384	0.766192	0.0654827
ENSRNOG00000053683	AABR07016703.1	ensembl	0.659138	4.81764	6.53452	0.0654924
ENSRNOG00000001136	Pebp1	ensembl	3169.38	3953.34	1.24186	0.0655696
ENSRNOG00000059873	U6	ensembl	10.9381	4.9799	0.453984	0.0655901
ENSRNOG00000021160	Hormad1	ensembl	20.8316	11.4763	0.550656	0.0656479
ENSRNOG00000020505	Map4k1	ensembl	17.0314	28.9364	1.67303	0.0658907
ENSRNOG00000052572	Aff2	ensembl_havana	735.348	553.726	0.749317	0.0659049
ENSRNOG00000059134	AABR07036513.2	ensembl	2.42454	6.83023	2.66647	0.0660115
ENSRNOG00000026277	Zc3h6	ensembl	1255.22	995.237	0.789511	0.0660316
ENSRNOG00000018809	Psmd5	ensembl	437.765	587.322	1.33433	0.0660502
ENSRNOG00000005792	Ankef1	ensembl	32.6702	52.8547	1.59636	0.0660848
ENSRNOG00000055184	AABR07052263.1	ensembl	0	2.34862	20.4075	0.0661736
ENSRNOG00000051999	Trbv13-3	ensembl	0	2.34862	20.4075	0.0661766
ENSRNOG00000037406	RGD1564171	ensembl	504.508	690.601	1.36156	0.0661791
ENSRNOG00000059555	AABR07021998.1	ensembl	0	2.34862	20.4074	0.0661928
ENSRNOG00000031356	Olr544	ensembl	0	2.34862	20.4074	0.0661937
ENSRNOG00000037402	Myeov2	ensembl	1177.81	1568.85	1.32538	0.0662034
ENSRNOG00000026489	Olr1125	ensembl	0	2.34862	20.4073	0.0662147
ENSRNOG00000018795	Rpl18a	ensembl	2066.63	2623.21	1.2641	0.0662174
ENSRNOG00000024928	RGD1306519	ensembl	0	2.34862	20.4072	0.0662387
ENSRNOG00000023809	Opcml	ensembl	1185.52	861.165	0.722479	0.0662454
ENSRNOG00000056691	AC107505.2	ensembl	0	2.3498	20.3943	0.0662586
ENSRNOG00000005162	Cst9l	ensembl	0	2.34862	20.4071	0.0662614
ENSRNOG00000060571	Tmem189	ensembl	596.363	456.85	0.76282	0.066276
ENSRNOG00000053750	SNORA17	ensembl	0	2.3498	20.3942	0.0662794
ENSRNOG00000004809	RGD1309783	ensembl	0	2.34862	20.4071	0.0662802
ENSRNOG00000037687	Rspo2	ensembl	87.6482	57.6221	0.657947	0.0662861
ENSRNOG00000013793	C1qtnf9	ensembl	45.5592	69.935	1.52437	0.0663016
ENSRNOG00000040358	Mir666	ensembl	0	2.3498	20.3941	0.0663054
ENSRNOG00000021992	Rtp1	ensembl	0	2.3498	20.3941	0.066307
ENSRNOG00000021182	Sv2a	ensembl	5527.39	4006.42	0.72127	0.0664227
ENSRNOG00000058728	U6	ensembl	2.10935	0	0.0544844	0.0664363
ENSRNOG00000014464	Tnfsf13b	ensembl_havana	14.0171	5.59741	0.411119	0.0664466
ENSRNOG00000054739	SNORD110	ensembl	2.10935	0	0.0544845	0.0664489
ENSRNOG00000000524	RGD735065	ensembl	541.747	700.078	1.28731	0.0664753
ENSRNOG00000052025	Aes	ensembl	943.418	726.727	0.766584	0.066604
ENSRNOG00000047374	Gnas	ensembl	3111.04	2437.77	0.779583	0.0666367
ENSRNOG00000001730	Acap2	ensembl	1993.16	1602.19	0.799971	0.0666811
ENSRNOG00000002265	Casr	ensembl	86.3688	123.922	1.43135	0.0666976
ENSRNOG00000005420	Abcg8	ensembl	4.41031	11.5346	2.50675	0.0667316
ENSRNOG00000014795	Nr2f1	ensembl	375.627	265.235	0.703194	0.0667487
ENSRNOG00000037661	Tmsbl1	ensembl	106.275	188.718	1.76201	0.066864
ENSRNOG00000054642	U2	ensembl	13.0475	24.6407	1.85185	0.0669939
ENSRNOG00000011306	Myod1	ensembl	4.42079	1.06346	0.249371	0.0670165
ENSRNOG00000012448	Chrnb3	ensembl_havana	131.358	74.7967	0.569017	0.0670264
ENSRNOG00000013654	Cbln2	ensembl	864.761	681.807	0.784476	0.067055
ENSRNOG00000057709	snoU6-53	ensembl	2.35439	6.71574	2.91772	0.067066
ENSRNOG00000005334	Acvr2a	ensembl	859.604	675.085	0.781631	0.0671041
ENSRNOG00000015583	Dnal4	ensembl	174.617	235.7	1.34243	0.0671482
ENSRNOG00000008939	Nxph1	ensembl	869.796	616.114	0.705135	0.0672896
ENSRNOG00000026037	Plb1	ensembl	0.974322	5.82622	5.59253	0.0673444
ENSRNOG00000023182	RGD1565317	ensembl	62.5546	92.3618	1.47223	0.06746
ENSRNOG00000004312	Tmbim4	ensembl	352.7	527.939	1.48904	0.0676105
ENSRNOG00000043738	AABR07049554.1	ensembl	1.74053	6.2139	3.59647	0.0676392
ENSRNOG00000028650	Inf2	ensembl	89.7369	58.5539	0.65161	0.0676449
ENSRNOG00000009137	Ubxn2b	ensembl	621.968	456.518	0.729975	0.06767
ENSRNOG00000024435	Wbscr17	havana	108.809	75.3833	0.689208	0.0676732
ENSRNOG00000010076	Pkp1	ensembl	34.8143	20.3796	0.584164	0.0676787
ENSRNOG00000046284	AABR07027451.1	ensembl	0	3.92252	32.2822	0.0678998
ENSRNOG00000007775	Cmpk1	ensembl	3084.57	2488.6	0.80339	0.0679067
ENSRNOG00000000887	AABR07035098.1	ensembl	938.669	722.041	0.765027	0.0679326
ENSRNOG00000001252	Chst12	ensembl	74.6947	48.5846	0.648666	0.0679586
ENSRNOG00000057292	AABR07043287.1	ensembl	110.931	70.3059	0.631749	0.0680534
ENSRNOG00000020705	Rnls	ensembl	81.049	113.282	1.38875	0.0680601
ENSRNOG00000017448	Exoc3l2	ensembl	27.1843	43.9448	1.6218	0.0680608
ENSRNOG00000055323	AABR07063421.1	ensembl	3.86639	0.727263	0.212059	0.0681069
ENSRNOG00000026787	Disp2	ensembl	1943.47	1502.93	0.769154	0.0681337
ENSRNOG00000051289	Rn50_X_0693.1	havana	113.165	156.739	1.37823	0.0681678
ENSRNOG00000055382	Hcn1	ensembl	304.074	215.7	0.706025	0.0681829
ENSRNOG00000056945	AC097778.1	ensembl	4.9336	1.45453	0.296598	0.0681935
ENSRNOG00000055524	Trip10	ensembl	175.866	240.726	1.36175	0.0682895
ENSRNOG00000059894	Hmmr	ensembl	168.293	124.572	0.737094	0.0683343
ENSRNOG00000005247	Surf1	ensembl	171.546	115.89	0.672751	0.068335
ENSRNOG00000014479	Cttnbp2nl	ensembl	1115.03	870.326	0.776631	0.0683593
ENSRNOG00000011120	LOC680663	ensembl	136.762	190.42	1.38218	0.0683855
ENSRNOG00000031163	Nfkbiz	ensembl	60.8513	88.5598	1.45214	0.0684014
ENSRNOG00000014083	Iqsec3	ensembl_havana	808.837	588.077	0.72307	0.0684131
ENSRNOG00000061515	Fbxo45	ensembl	484.178	370.744	0.762883	0.0684678
ENSRNOG00000035453	Mir3596c	ensembl	1.0505	4.75685	4.55706	0.0685317
ENSRNOG00000062024	Rn60_14_0085.1	havana	2.68396	7.50261	2.84067	0.0685803
ENSRNOG00000018775	Cystm1	ensembl	136.427	185.016	1.3511	0.0685954
ENSRNOG00000048973	LOC100909771	ensembl	38.6067	57.0305	1.47423	0.0685956
ENSRNOG00000005270	Sycp3	ensembl	369.03	476.07	1.28313	0.0686899
ENSRNOG00000048145	Sstr1	ensembl	83.5696	47.7395	0.569027	0.0687676
ENSRNOG00000052665	Onecut2	ensembl	3.02791	8.8462	2.95489	0.0687681
ENSRNOG00000047785	AABR07065645.2	ensembl	0.253393	4.65097	11.3392	0.0687966
ENSRNOG00000000129	Phf24	ensembl	193.607	133.314	0.684872	0.0689153
ENSRNOG00000058458	AC111319.1	ensembl	0	2.52153	21.2199	0.0689214
ENSRNOG00000031769	Chchd7	ensembl	115.031	172.317	1.49634	0.0689473
ENSRNOG00000001006	Nptx2	ensembl_havana	190.002	134.493	0.70583	0.0689871
ENSRNOG00000061907	SNORA70	ensembl	2.87556	0.33501	0.159468	0.0689968
ENSRNOG00000045864	RGD1560203	ensembl	0	2.5168	21.274	0.0691038
ENSRNOG00000021682	Dcakd	ensembl	175.32	129.681	0.736927	0.0692117
ENSRNOG00000014793	Gpr149	ensembl	324.254	234.532	0.719519	0.069246
ENSRNOG00000054945	LOC257642	ensembl	42.822	17.6149	0.416459	0.0693596
ENSRNOG00000030204	LOC499544	ensembl	1.16592	4.47435	3.46504	0.0694784
ENSRNOG00000008354	Slc9a8	ensembl	264.83	350.439	1.31565	0.0694948
ENSRNOG00000047080	Gng4	ensembl	394.29	246.826	0.622428	0.0695178
ENSRNOG00000008761	Ncs1	ensembl	2571.81	1934.54	0.748676	0.0695553
ENSRNOG00000033496	Igdcc4	ensembl	390.315	277.63	0.709678	0.0695886
ENSRNOG00000005695	Mgp	ensembl	699.4	961.927	1.36663	0.0697824
ENSRNOG00000010459	Fbxo43	ensembl	20.993	36.9504	1.71326	0.0698014
ENSRNOG00000010696	Neil2	ensembl	21.1108	10.1851	0.475708	0.0698049
ENSRNOG00000011170	RGD1359634	ensembl	22.9798	41.9266	1.8389	0.0700074
ENSRNOG00000050819	Birc5	ensembl	3.68102	9.34686	2.48652	0.0700242
ENSRNOG00000028036	Adamts7	ensembl	60.0585	39.1081	0.650224	0.0700517
ENSRNOG00000043562	Mir1956	ensembl	1.84993	8.10695	3.91555	0.0700854
ENSRNOG00000054954	Pirb	ensembl	36.0894	22.7785	0.627197	0.0702325
ENSRNOG00000007127	Bbs5	ensembl	827.884	1121.78	1.35051	0.0702947
ENSRNOG00000025037	Ankk1	ensembl	0.329569	2.9126	6.84089	0.0703186
ENSRNOG00000012163	Plekhm2	ensembl	605.258	473.24	0.778371	0.0703885
ENSRNOG00000056537	Gm16432	ensembl	19.4064	34.2332	1.74771	0.0704134
ENSRNOG00000046379	LOC100912604	ensembl	54.8536	81.775	1.48125	0.0704613
ENSRNOG00000009299	Adra2c	ensembl	41.4445	25.3548	0.614698	0.0705266
ENSRNOG00000056400	Hhipl2	ensembl	0	2.68836	23.0121	0.0705618
ENSRNOG00000050868	Ddx43	ensembl	0	2.68836	23.012	0.0705829
ENSRNOG00000050791	Olr790	ensembl	0	2.68836	23.0119	0.0706078
ENSRNOG00000043014	Fmo13	ensembl	0	2.68836	23.0118	0.0706328
ENSRNOG00000026836	Rn50_3_1464.1	havana	30.1096	18.3005	0.609502	0.0706414
ENSRNOG00000012821	Lect1	ensembl	460.707	640.889	1.38603	0.0706492
ENSRNOG00000036952	LOC296235	ensembl_havana	0	2.68836	23.0118	0.070654
ENSRNOG00000056695	SNORA17	ensembl	1.34917	4.87015	3.60554	0.0706569
ENSRNOG00000001794	Muc13	ensembl_havana	0	2.68836	23.0117	0.0706723
ENSRNOG00000051623	Exosc8	ensembl	274.496	411.016	1.49465	0.0707098
ENSRNOG00000054480	Olr1533	ensembl	0.360465	4.36933	10.0718	0.0707536
ENSRNOG00000011226	Timm8a1	ensembl	952.318	1201.51	1.25578	0.0708296
ENSRNOG00000037715	BC024978	ensembl	58.4701	84.6388	1.43924	0.070833
ENSRNOG00000014686	Kcnd3	ensembl	1076.79	808.564	0.746863	0.0708482
ENSRNOG00000020165	Ahsp	ensembl	15.2683	26.7534	1.70024	0.070873
ENSRNOG00000060412	RT1-M4	ensembl_havana	0	2.7456	23.3294	0.0708758
ENSRNOG00000055732	AABR07010040.2	ensembl	0	2.7456	23.3293	0.0708933
ENSRNOG00000013208	Olr382	ensembl	0	2.7456	23.3293	0.0709149
ENSRNOG00000009436	Hemgn	ensembl	26.3013	44.5839	1.67972	0.0710057
ENSRNOG00000007829	Lactb2	ensembl	548.009	700.921	1.27243	0.0710849
ENSRNOG00000011865	Fam96b	ensembl	599.104	438.685	0.728574	0.0711605
ENSRNOG00000031890	Ncam1	ensembl	6381.1	4943.87	0.771058	0.0711905
ENSRNOG00000042950	Slc5a9	ensembl	11.0533	19.5868	1.78704	0.0712206
ENSRNOG00000002691	Shcbp1l	ensembl	2.92084	8.45159	2.88176	0.0712431
ENSRNOG00000013795	Asb7	ensembl	402.727	308.702	0.762946	0.0712805
ENSRNOG00000056263	AABR07061465.1	ensembl	3.45017	9.80125	2.88565	0.0713057
ENSRNOG00000046961	AABR07041057.1	ensembl	48.222	87.2648	1.79301	0.0713401
ENSRNOG00000060927	AABR07057683.1	ensembl	387.541	506.175	1.29957	0.0713778
ENSRNOG00000008176	Nppa	ensembl	40.7673	66.5224	1.62506	0.0715216
ENSRNOG00000052165	U6	ensembl	3.88913	9.46135	2.3414	0.0715389
ENSRNOG00000041518	AABR07002711.1	ensembl	1.63346	5.48529	3.34753	0.0716938
ENSRNOG00000046758	Tmem217	ensembl	1.19682	5.32201	4.02223	0.0717475
ENSRNOG00000007755	Pm20d2	ensembl	328.028	252.84	0.768247	0.0717559
ENSRNOG00000027341	Tenm2	ensembl	1202.94	867.74	0.718029	0.0718119
ENSRNOG00000016939	Chmp7	ensembl	1717.03	1368.83	0.793887	0.071812
ENSRNOG00000015383	Asxl3	ensembl	81.6729	49.36	0.600828	0.0718198
ENSRNOG00000052453	AABR07019254.1	ensembl	1.55728	5.37452	3.25925	0.0718232
ENSRNOG00000049469	AABR07049554.2	ensembl	16.2157	7.2235	0.449102	0.0718486
ENSRNOG00000053325	Gm28044	ensembl	3.69753	10.0696	2.64693	0.0718952
ENSRNOG00000029859	AABR07021384.1	ensembl	608.301	807.828	1.3211	0.0719999
ENSRNOG00000018184	Tpm1	ensembl	3594.86	2885.23	0.798754	0.0720724
ENSRNOG00000048672	Tmem207	ensembl	1.0196	7.39506	6.81964	0.0722278
ENSRNOG00000000963	Tmem132c	ensembl	174.695	122.679	0.697843	0.0722444
ENSRNOG00000056942	SNORD31	ensembl	40.5961	60.4368	1.49128	0.0722622
ENSRNOG00000015666	Abcc12	ensembl	2.63868	7.5526	2.92026	0.0724049
ENSRNOG00000051345	Rn50_5_0814.17	havana	8.67409	18.3086	2.12941	0.0724534
ENSRNOG00000027767	Slc38a5	ensembl	17.806	29.1626	1.61493	0.072588
ENSRNOG00000053770	SNORA15	ensembl	1.0505	4.31225	4.06491	0.0726831
ENSRNOG00000019504	Adprhl1	ensembl_havana	19.3648	32.7859	1.69889	0.072688
ENSRNOG00000004828	Acvr1c	ensembl	137.967	97.1494	0.701543	0.0728392
ENSRNOG00000024294	AABR07019083.1	ensembl	32.4129	18.5828	0.575782	0.0729104
ENSRNOG00000019936	Anapc15	ensembl	577.24	439.054	0.757926	0.0730042
ENSRNOG00000026519	AABR07044711.1	ensembl	3087.42	2488.63	0.802694	0.0731422
ENSRNOG00000003742	Cdkl5	ensembl	807.853	599.443	0.738469	0.0731718
ENSRNOG00000059887	U6	ensembl	1.44186	5.99321	4.22796	0.0731846
ENSRNOG00000039892	Olr1185	ensembl	0.360465	3.35602	7.97879	0.0732126
ENSRNOG00000034078	Mxi1	ensembl_havana	4077.96	3315.34	0.809169	0.0732294
ENSRNOG00000022445	Iqcf3	ensembl	0.360465	3.35602	7.97871	0.073236
ENSRNOG00000011483	S100a9	ensembl	12.4027	23.9372	1.90898	0.0732472
ENSRNOG00000004604	Slc38a10	ensembl	740.662	953.311	1.28198	0.0734075
ENSRNOG00000053643	AABR07063152.1	ensembl	244.053	326.85	1.33173	0.0735793
ENSRNOG00000004686	Spop	ensembl	3779.75	3058.23	0.805415	0.0736576
ENSRNOG00000002538	Epb4.1l5	ensembl	679.305	897.731	1.31349	0.0737332
ENSRNOG00000059167	AABR07071622.1	ensembl	0	2.34744	20.394	0.0737907
ENSRNOG00000048139	Ncmap	ensembl	0	2.34744	20.3939	0.0738163
ENSRNOG00000056024	Bnip2	ensembl	1044.47	1319.43	1.25795	0.0738209
ENSRNOG00000062027	Rn60_12_0107.3	havana	0	2.35099	20.3536	0.0738693
ENSRNOG00000010930	Usp39	ensembl	328.136	432.174	1.31357	0.073888
ENSRNOG00000060057	AABR07069186.1	ensembl	0	2.35099	20.3535	0.0738889
ENSRNOG00000059361	AC113785.1	ensembl	0	2.35099	20.3535	0.0738903
ENSRNOG00000061544	Spock2	ensembl	1993.37	1565.27	0.781421	0.073916
ENSRNOG00000033540	Cts7	ensembl	0	2.35099	20.3533	0.0739363
ENSRNOG00000016945	Pla2g2a	ensembl	30.9745	49.795	1.61645	0.0739582
ENSRNOG00000056150	Purb	ensembl	1021.9	790.341	0.769796	0.0739647
ENSRNOG00000047231	Rn60_X_0777.2	havana	3.74281	8.96069	2.33736	0.0740502
ENSRNOG00000018487	Slc3a2	ensembl	2735.38	3457.34	1.25856	0.0740803
ENSRNOG00000020723	Pten	ensembl	3104.99	2518.7	0.807184	0.0740834
ENSRNOG00000015956	Usp29	ensembl	5530.53	4136.22	0.744075	0.0741944
ENSRNOG00000050810	AABR07064048.1	ensembl	4.29488	10.4164	2.34802	0.0741996
ENSRNOG00000003264	Nat9	ensembl	323.183	420.408	1.29463	0.0742228
[truncated: 20,107 more rows]
