# Supplementary material for: A preliminary study of the effect of a high-salt diet on transcriptome dynamics in rat hypothalamic forebrain and brainstem cardiovascular control centers
Source: PeerJ. 2020 Mar 3;8:e8528. doi: 10.7717/peerj.8528 (PMC7059759; doi:10.7717/peerj.8528)
Supplement: Table S3 [file peerj-08-8528-s003.xlsx]

## Sheet: S3_SON_SRSvsSHS
Supplemental Table S3: RNA-Seq datasets for SON
	GeneName	GeneType	DESeq.shrnd.AvgCount	DESeq.shrhs.AvgCount	edgeR.foldChange	edgeR.PValue
ENSRNOG00000029145	AY172581.2	insdc	1760.12	3670.2	2.08873	2.13401e-17
ENSRNOG00000057490	SCARNA21	ensembl	630.45	312.392	0.496876	1.92769e-09
ENSRNOG00000051548	Lmod1	ensembl	821.494	1387.09	1.68897	9.64153e-09
ENSRNOG00000010420	Shfm1	ensembl	3273.02	5294.41	1.62039	1.11996e-08
ENSRNOG00000049829	Igkc	ensembl	328.997	5.47266	0.0169775	3.51273e-08
ENSRNOG00000052607	SNORA12	ensembl	150.765	58.9164	0.391161	1.2101e-07
ENSRNOG00000026238	RGD1562618	ensembl	1165.48	2051.9	1.76426	1.36914e-07
ENSRNOG00000042083	Igkv8-28	ensembl	92.6362	0	0.00134032	1.6574e-07
ENSRNOG00000003666	Jchain	ensembl	29.2374	2.51994	0.0913177	1.774e-07
ENSRNOG00000030049	Znhit6	ensembl	444.566	712.757	1.60409	2.15436e-07
ENSRNOG00000005191	Trim44	ensembl	1571.05	2286.85	1.4569	6.69423e-07
ENSRNOG00000052563	snoU89	ensembl	891.429	537.523	0.603719	9.88343e-07
ENSRNOG00000017988	Mcur1	ensembl	133.609	58.477	0.4391	2.96418e-06
ENSRNOG00000020618	Rpl13a	ensembl	2201.22	3656.86	1.66458	3.67939e-06
ENSRNOG00000046313	Basp1	ensembl	2020.22	2920.06	1.44775	4.54918e-06
ENSRNOG00000004107	Rpl23	ensembl	6909.2	9723.69	1.4089	4.92494e-06
ENSRNOG00000050000	LOC100361706	ensembl	110.085	4.79797	0.0447272	5.56349e-06
ENSRNOG00000002579	Parm1	ensembl	2243.92	3089.11	1.37826	6.0883e-06
ENSRNOG00000012454	Trmt10b	ensembl	409.611	224.765	0.549773	6.18377e-06
ENSRNOG00000009884	Lgals1	ensembl	4447.31	6301.41	1.41907	7.33969e-06
ENSRNOG00000058383	AABR07018087.1	ensembl	158.898	290.28	1.83306	7.4107e-06
ENSRNOG00000029061	Hirip3	ensembl	1044.92	1568.23	1.50321	7.921e-06
ENSRNOG00000010234	Nsmaf	ensembl	670.65	428.861	0.640692	8.19711e-06
ENSRNOG00000008489	Ppih	ensembl	33.9569	5.9839	0.181939	8.69952e-06
ENSRNOG00000000990	Pdap1	ensembl_havana	1866.36	2762.36	1.4819	9.50541e-06
ENSRNOG00000021232	Ddrgk1	ensembl	2029.75	2806.09	1.3846	1.10848e-05
ENSRNOG00000021225	Oxt	ensembl	35909.3	62162.6	1.73299	1.13154e-05
ENSRNOG00000043400	LOC100910678	ensembl	1290.5	2050.03	1.59228	1.3204e-05
ENSRNOG00000055297	AABR07005633.1	ensembl	189.686	330.723	1.74928	1.38787e-05
ENSRNOG00000016777	R3hcc1	ensembl	809.02	1257.9	1.55831	1.40991e-05
ENSRNOG00000029738	Diras1	ensembl	488.353	720.099	1.47776	1.50453e-05
ENSRNOG00000025892	Set	ensembl	486.654	701.913	1.44375	1.52538e-05
ENSRNOG00000025388	Mrpl33	ensembl	1016.47	1519.2	1.49595	1.66068e-05
ENSRNOG00000005331	Vapb	ensembl	2923.87	3932.59	1.34675	1.67073e-05
ENSRNOG00000004843	Pole3	ensembl	920.783	1316.87	1.43172	1.82622e-05
ENSRNOG00000048402	Igh-6	ensembl	92.1599	4.97161	0.055795	2.33511e-05
ENSRNOG00000004246	Spag7	ensembl	818.653	508.439	0.621354	2.41453e-05
ENSRNOG00000012747	Spock1	ensembl	1203.04	1741.22	1.44848	2.4997e-05
ENSRNOG00000020410	Th	ensembl	748.481	1329.91	1.77837	2.58912e-05
ENSRNOG00000026059	Paqr6	ensembl_havana	513.784	774.625	1.51074	2.63274e-05
ENSRNOG00000057971	U5	ensembl	11.4586	0.970941	0.093759	2.66589e-05
ENSRNOG00000034190	Ighm	ensembl	233.468	31.7844	0.136966	2.73622e-05
ENSRNOG00000009037	Sulf1	ensembl	1020.83	627.415	0.616536	3.09828e-05
ENSRNOG00000052549	Chga	ensembl	4947.45	6588.84	1.33359	3.20974e-05
ENSRNOG00000055568	AABR07043725.1	ensembl	1382.57	1937.74	1.40293	3.25938e-05
ENSRNOG00000007532	RGD1305178	ensembl_havana	1190.53	1688.61	1.42103	3.32352e-05
ENSRNOG00000018273	Ncl	ensembl_havana	6233.68	8432.9	1.35439	3.76349e-05
ENSRNOG00000026705	Dgki	ensembl	703.975	449.118	0.640032	3.94484e-05
ENSRNOG00000030332	Ighg	ensembl	35.8496	0.660755	0.0214302	4.02949e-05
ENSRNOG00000018184	Tpm1	ensembl	4898.49	6620.24	1.35328	4.24821e-05
ENSRNOG00000020438	Prpf38b	ensembl	2256.97	3071.59	1.36293	4.47177e-05
ENSRNOG00000020161	Zbtb7a	ensembl	717.751	1020.4	1.42451	4.5463e-05
ENSRNOG00000059449	Metazoa_SRP	ensembl	4469.21	1644.1	0.36837	4.55905e-05
ENSRNOG00000002835	Luc7l3	ensembl	7375.29	10142.2	1.37704	4.74557e-05
ENSRNOG00000053070	AABR07053749.1	ensembl	733.06	1041.51	1.42305	4.81868e-05
ENSRNOG00000017945	Serf1	ensembl_havana	379.711	565.919	1.49165	4.83092e-05
ENSRNOG00000016628	Scgn	ensembl	570.937	826.415	1.4485	4.89988e-05
ENSRNOG00000003148	Timp2	ensembl	4664.62	6183.93	1.32776	5.18854e-05
ENSRNOG00000020255	Sars	ensembl	5103.39	6766.08	1.32741	5.27697e-05
ENSRNOG00000039050	Lrp1b	ensembl	95.9183	40.5469	0.425134	5.59573e-05
ENSRNOG00000054305	SNORD116	ensembl	87.7504	33.304	0.379289	5.68628e-05
ENSRNOG00000008519	RGD1309079	ensembl	1218.92	881.158	0.723711	6.34219e-05
ENSRNOG00000058683	AABR07044635.1	ensembl	0	6.37581	52.4129	6.39813e-05
ENSRNOG00000034198	Wbp5	ensembl	8444.69	11233.1	1.33202	6.89923e-05
ENSRNOG00000050169	Pet100	ensembl	1200.88	1714.79	1.43112	8.24841e-05
ENSRNOG00000046449	Npy	ensembl	79.6627	219.331	2.76178	8.53387e-05
ENSRNOG00000004998	Jakmip1	ensembl	2480.07	3403.71	1.37412	8.67283e-05
ENSRNOG00000029121	AABR07065790.1	ensembl	15.5857	0	0.00795819	9.26791e-05
ENSRNOG00000014230	Map1a	ensembl	15921.8	21081.7	1.32592	0.000100177
ENSRNOG00000007673	Ppig	ensembl	3666.6	4944.25	1.34991	0.000104261
ENSRNOG00000014272	Rpl35	ensembl	3402.35	4818.05	1.41823	0.00011111
ENSRNOG00000007610	Gdf11	ensembl	1325.88	1768.55	1.33617	0.000113223
ENSRNOG00000054828	AABR07051708.1	ensembl	17.8589	0	0.00689235	0.000116332
ENSRNOG00000053770	SNORA15	ensembl	6.00506	0	0.0205313	0.000116422
ENSRNOG00000004239	LOC100362999	ensembl	5228.31	6966.67	1.33406	0.00012081
ENSRNOG00000021723	Tma7	ensembl	68.2456	128.313	1.87605	0.000123048
ENSRNOG00000003625	Ubxn4	ensembl	4184.81	5492.13	1.31384	0.000125473
ENSRNOG00000025711	LOC499770	ensembl	309.554	140.939	0.457025	0.000129009
ENSRNOG00000014170	Dbn1	ensembl	1345.8	1856.53	1.38239	0.000133097
ENSRNOG00000003789	AABR07037054.1	ensembl	454.449	646.981	1.42402	0.000140754
ENSRNOG00000013388	Pgap1	ensembl	1439.89	1069.99	0.74419	0.000147491
ENSRNOG00000017780	Akr7a2	ensembl	234.729	134.559	0.574019	0.00015773
ENSRNOG00000050800	LOC100911576	ensembl	4523.62	5866.19	1.29851	0.000158032
ENSRNOG00000018454	Apoe	ensembl	74370.6	96199.9	1.29525	0.000163937
ENSRNOG00000001348	Erp29	ensembl	4016.59	5502.84	1.37173	0.000166413
ENSRNOG00000000322	Atg5	ensembl	675.942	488.948	0.724163	0.000168728
ENSRNOG00000009148	Cyb5rl	ensembl	12.1142	2.15591	0.191827	0.000178693
ENSRNOG00000027022	AABR07043654.1	ensembl	1597.88	2261.47	1.4186	0.000180025
ENSRNOG00000060098	Ptms	ensembl	1785.12	2646.54	1.4856	0.000188115
ENSRNOG00000028211	Akap17a	ensembl	434.955	642.539	1.47885	0.000194396
ENSRNOG00000000042	Xpr1	ensembl	804.955	552.14	0.686392	0.000195533
ENSRNOG00000061246	Fam49b	ensembl	2176.01	1655.61	0.761779	0.000206874
ENSRNOG00000051551	AABR07064867.2	ensembl	7.63115	0.323647	0.0572901	0.000208271
ENSRNOG00000014576	Dock3	ensembl	2120.98	1559.16	0.736183	0.000208724
ENSRNOG00000027593	Ndufv3-ps1	ensembl	866.362	1235.85	1.42901	0.000215367
ENSRNOG00000011945	Cyfip1	ensembl	2881.19	2183.05	0.758602	0.000216899
ENSRNOG00000048036	Ncan	ensembl	1421.95	1888.09	1.32995	0.000220148
ENSRNOG00000012393	S100a13	ensembl	1399.89	1853.61	1.32626	0.000224281
ENSRNOG00000054081	SNORD12	ensembl	10.6113	30.2724	2.82361	0.000231488
ENSRNOG00000017213	Cdk11b	ensembl	938.633	1270.98	1.35555	0.000236299
ENSRNOG00000060349	Fam3c	ensembl	3065.17	3951.66	1.29086	0.0002368
ENSRNOG00000013911	Nagk	ensembl	510.808	724.088	1.41723	0.000238134
ENSRNOG00000054125	AABR07051592.2	ensembl	78.8035	1.18497	0.0170345	0.000245461
ENSRNOG00000016016	Zmat2	ensembl	2288.9	2990	1.30814	0.000254666
ENSRNOG00000015703	Hypk	ensembl	2386.48	3284.38	1.37899	0.00026424
ENSRNOG00000060597	Syf2	ensembl	2707.7	3686.44	1.36351	0.000274816
ENSRNOG00000056397	SNORD22	ensembl	102.229	54.9672	0.537037	0.000303057
ENSRNOG00000046190	AC112062.1	ensembl	263.892	159.434	0.604001	0.000305507
ENSRNOG00000055079	Ndufaf2	ensembl	540.029	737.974	1.36986	0.000319929
ENSRNOG00000053577	Gramd1b	ensembl	850.684	598.681	0.704902	0.000324357
ENSRNOG00000048430	Myo18b	ensembl	13.3129	35.4888	2.64523	0.000326772
ENSRNOG00000001092	Kl	ensembl	578.871	46.4507	0.080774	0.000337009
ENSRNOG00000040040	Ndufaf6	ensembl	128.526	71.5343	0.556174	0.000343865
ENSRNOG00000058206	AABR07058788.3	ensembl	0	6.09207	49.9725	0.00034457
ENSRNOG00000057880	Myh11	ensembl	12789.2	17434.4	1.3653	0.000346143
ENSRNOG00000055116	AABR07003827.1	ensembl	144.649	74.805	0.518445	0.000352417
ENSRNOG00000035634	Mir300	ensembl	12.0758	2.23764	0.193377	0.000352708
ENSRNOG00000054495	Cldn2	ensembl_havana	327.366	26.7187	0.082317	0.000355422
ENSRNOG00000004457	RGD1560617	ensembl	568.334	785.322	1.38562	0.000359608
ENSRNOG00000031249	Slco1a2	ensembl	207.331	6.4533	0.0319552	0.000364928
ENSRNOG00000003428	Rufy3	ensembl	11247.3	14443.1	1.28597	0.000366899
ENSRNOG00000031979	Mt-atp6	insdc	46969.3	64340.5	1.37133	0.0003737
ENSRNOG00000004717	Epyc	ensembl	6.26709	0.296242	0.0695156	0.000380873
ENSRNOG00000010053	Calcr	ensembl	831.017	533.869	0.642368	0.000381261
ENSRNOG00000006636	Otud6b	ensembl	2030.77	2693.96	1.32801	0.000391746
ENSRNOG00000017506	Cltb	ensembl	3809.05	4979.08	1.30875	0.000394652
ENSRNOG00000056003	SNORA5	ensembl	24.6054	7.91183	0.32728	0.000404749
ENSRNOG00000029910	Golga4	ensembl	6021.92	7645.73	1.27143	0.000412076
ENSRNOG00000027331	Ppef1	ensembl	5.43437	0	0.0221589	0.000431428
ENSRNOG00000000231	Kctd17	ensembl	321.089	457.954	1.42824	0.000433491
ENSRNOG00000011603	Cab39l	ensembl	1354.94	886.112	0.655581	0.00044663
ENSRNOG00000061415	Taf1b	ensembl	355.776	226.618	0.637142	0.000466642
ENSRNOG00000020889	Nucb1	ensembl	6225.45	7961.24	1.28069	0.000471434
ENSRNOG00000012714	RGD1564149	ensembl	41.7485	2.656	0.0657758	0.000478657
ENSRNOG00000013742	Large	ensembl	885.09	647.167	0.733058	0.000485737
ENSRNOG00000005482	Sap30bp	ensembl	1185.48	1654.57	1.39914	0.000501152
ENSRNOG00000057421	AABR07065699.2	ensembl	13.9858	0.323647	0.0314079	0.000507441
ENSRNOG00000004111	Soat1	ensembl	541.194	374.187	0.692018	0.000538232
ENSRNOG00000005377	Tmem11	ensembl	685.401	913.691	1.33625	0.000544108
ENSRNOG00000000473	Pfdn6	ensembl_havana	791.079	1086.13	1.37551	0.000555376
ENSRNOG00000026036	Pdyn	ensembl	5124.26	6968.75	1.36162	0.000561099
ENSRNOG00000008081	Ddx27	ensembl	901.813	1195.01	1.32771	0.00056204
ENSRNOG00000017460	Imp3	ensembl	957.11	1275.35	1.33357	0.000563156
ENSRNOG00000002139	RGD1311575	ensembl	1758.74	2278.41	1.29711	0.000564323
ENSRNOG00000004330	Chrdl1	ensembl	108.639	49.3158	0.457785	0.000564995
ENSRNOG00000056788	AABR07070901.1	ensembl	4.99518	0	0.023806	0.000577221
ENSRNOG00000006908	Pou3f2	ensembl	463.448	641.572	1.38361	0.000579102
ENSRNOG00000018129	Ndufab1	ensembl	1182.08	892.215	0.755609	0.000602622
ENSRNOG00000017445	Tubb2b	ensembl	2825.97	3631.52	1.28688	0.000603563
ENSRNOG00000006789	Ddit3	ensembl	1151.71	1543.68	1.34141	0.000608032
ENSRNOG00000034241	Set	ensembl	2881.98	3722.42	1.29283	0.000609478
ENSRNOG00000024022	Ndfip2	ensembl	1448.78	1110.5	0.767614	0.000615195
ENSRNOG00000061366	AABR07037528.1	ensembl	115.23	63.9837	0.556028	0.000630214
ENSRNOG00000050318	Fsd1	ensembl	813.992	1108.86	1.36382	0.000648813
ENSRNOG00000028422	Rmnd5a	ensembl	568.966	411.984	0.725084	0.000650808
ENSRNOG00000010378	Slc4a5	ensembl	208.013	9.01459	0.0441709	0.000650886
ENSRNOG00000054331	Wdpcp	ensembl	319.016	210.5	0.662135	0.00065661
ENSRNOG00000027006	Hnrnpa3	ensembl	1079.93	1459.23	1.35452	0.000657723
ENSRNOG00000060328	AABR07072262.1	ensembl	25.52	0	0.00482603	0.000664499
ENSRNOG00000058909	Rps9	ensembl	4960.97	6696.33	1.35178	0.000685949
ENSRNOG00000001058	Timm44	ensembl	1264.08	1653.68	1.31032	0.000686363
ENSRNOG00000036921	Tmsb10	ensembl	2522.59	3371.33	1.33841	0.000687894
ENSRNOG00000050543	Safb	ensembl	1452.31	1938.12	1.3372	0.000696191
ENSRNOG00000010316	Magohb	ensembl	81.6686	40.6364	0.502092	0.000703477
ENSRNOG00000058111	Itga2	ensembl	11.582	1.34843	0.122811	0.000708754
ENSRNOG00000023340	Tmem72	ensembl	385.622	35.6251	0.0930766	0.000708963
ENSRNOG00000005176	Map7d2	ensembl	4993.55	6350.75	1.27335	0.00072121
ENSRNOG00000025110	Vwa3a	ensembl	121.726	38.4136	0.318339	0.000724506
ENSRNOG00000004874	Flrt3	ensembl	1121.19	855.757	0.764238	0.000727666
ENSRNOG00000036971	RGD1566320	ensembl	1085.08	1421.43	1.31171	0.00073048
ENSRNOG00000001072	Cers4	ensembl	2356.17	2974.7	1.2642	0.000752671
ENSRNOG00000019895	Nedd8	ensembl	1952.72	2671.96	1.37122	0.000762225
ENSRNOG00000019778	Ptrf	ensembl	4356.46	5515.88	1.26795	0.000766243
ENSRNOG00000021213	Lix1l	ensembl	1442.55	1857.81	1.28991	0.000769159
ENSRNOG00000050898	AABR07034730.2	ensembl	14.1524	0	0.00878777	0.000773077
ENSRNOG00000031135	Smarcc2	ensembl	7086.7	8977.53	1.26832	0.000774275
ENSRNOG00000053285	Mllt6	ensembl	1180.67	1567.62	1.33069	0.000778028
ENSRNOG00000017766	Car12	ensembl	336.452	101.468	0.303134	0.000809331
ENSRNOG00000057855	F5	ensembl	909.618	125.402	0.138445	0.000815404
ENSRNOG00000008807	Rp1	ensembl	27.2299	3.69145	0.14307	0.000818311
ENSRNOG00000032420	Hmgb1-ps3	ensembl	302.25	443.717	1.47029	0.000824692
ENSRNOG00000015772	AC097890.1	ensembl	2067.54	2695.03	1.30477	0.000827625
ENSRNOG00000010116	Leo1	ensembl	2304.37	2944.86	1.27971	0.000827783
ENSRNOG00000042037	Smim7	ensembl	889.817	676.976	0.761579	0.000847593
ENSRNOG00000038330	RGD1359508	ensembl	111.005	57.3846	0.516385	0.000854194
ENSRNOG00000009571	Wipf3	ensembl	101.241	51.2037	0.50586	0.00085676
ENSRNOG00000032947	AABR07067749.1	ensembl	50.5484	100.509	1.98914	0.000860253
ENSRNOG00000010877	Alg9	ensembl	273.542	182.249	0.66731	0.000868655
ENSRNOG00000016247	Daw1	ensembl	85.6673	12.4093	0.147477	0.000871656
ENSRNOG00000001872	Lrrc74b	ensembl	27.1184	4.5974	0.172962	0.000882707
ENSRNOG00000018712	Camk2a	ensembl	1235.79	850.648	0.690089	0.000890675
ENSRNOG00000007147	Cyp46a1	ensembl	536.883	386.779	0.722329	0.00090841
ENSRNOG00000001764	Vps8	ensembl	1180.68	876.185	0.743738	0.000926471
ENSRNOG00000024640	Oacyl	ensembl	590.015	805.539	1.36692	0.000927711
ENSRNOG00000035454	Mir323	ensembl	5.53482	0.296242	0.07822	0.00095198
ENSRNOG00000048363	Dnah5	ensembl	269.392	95.0971	0.354625	0.000956815
ENSRNOG00000004947	Zfp871	ensembl	428.519	300.836	0.703728	0.000960448
ENSRNOG00000055714	Ak7	ensembl	275.266	41.0124	0.14986	0.000969589
ENSRNOG00000009324	Wdr54	ensembl	142.909	83.8019	0.589713	0.000971178
ENSRNOG00000058590	LOC100361706	ensembl	5.554	0.323647	0.078392	0.000976209
ENSRNOG00000054458	Kcnmb4	ensembl	819.937	1130.95	1.38127	0.0010007
ENSRNOG00000005659	Aurkb	ensembl	106.542	21.6729	0.205401	0.00102312
ENSRNOG00000046390	Tceal3	ensembl	1406.55	1804.25	1.28442	0.00102461
ENSRNOG00000001915	Chodl	ensembl	65.7658	31.8483	0.484096	0.00103946
ENSRNOG00000031273	RGD1559972	ensembl	1814.33	2609.54	1.44097	0.00104725
ENSRNOG00000014621	Rab8a	ensembl	1666.56	2183.42	1.31265	0.00105544
ENSRNOG00000039203	LOC100364509	ensembl	345.378	505.695	1.46741	0.00106135
ENSRNOG00000009990	Zranb2	ensembl	8425.7	10732.7	1.27544	0.00106611
ENSRNOG00000045587	Vom2r76	ensembl	1.6882	10.0705	5.50033	0.00106637
ENSRNOG00000014904	Ppp1r3e	ensembl	17.2446	40.8788	2.39423	0.00106897
ENSRNOG00000052180	Metazoa_SRP	ensembl	32.1208	7.30116	0.235695	0.00107025
ENSRNOG00000028373	LOC691044	ensembl	4.6254	0	0.0255818	0.00107592
ENSRNOG00000045860	U2af1	ensembl	950.988	1279.41	1.34829	0.00108239
ENSRNOG00000048039	LOC679149	ensembl	8.63731	26.532	3.06614	0.00110361
ENSRNOG00000056118	Cic	ensembl	407.48	556.61	1.36956	0.00110381
ENSRNOG00000028273	Tmem150b	ensembl	408.732	561.144	1.37718	0.00114075
ENSRNOG00000019961	Tcte1	ensembl	1589.88	2049.08	1.29096	0.0011467
ENSRNOG00000004743	Cdcp1	ensembl	4.7021	0	0.0253763	0.00117606
ENSRNOG00000012237	Rdx	ensembl	5573.45	7017.98	1.26092	0.00117647
ENSRNOG00000048733	Nup62	ensembl	505.279	683.201	1.35581	0.00118763
ENSRNOG00000014182	Tns1	ensembl	1235.03	1663.59	1.34838	0.00119152
ENSRNOG00000019758	Ipo13	ensembl	681.543	886.796	1.30414	0.00120348
ENSRNOG00000005890	Serbp1	ensembl	7039.62	8965.43	1.27533	0.00121997
ENSRNOG00000009484	Ptcd3	ensembl	1405.37	1092.29	0.778651	0.00122298
ENSRNOG00000021217	Itga10	ensembl	7.26137	21.6018	2.96972	0.00124038
ENSRNOG00000016541	Enc1	ensembl	2151.77	1651.17	0.768325	0.00124989
ENSRNOG00000025731	LOC100359583	ensembl	6761.4	9204.21	1.36325	0.00126703
ENSRNOG00000052113	Ppp1r9b	ensembl	6623.8	8585.23	1.29804	0.00127824
ENSRNOG00000010620	Ndc1	ensembl	390.276	270.938	0.695676	0.00127978
ENSRNOG00000049388	Prr32	ensembl	98.9519	4.63498	0.048495	0.0013148
ENSRNOG00000025157	LOC310177	ensembl	397.263	553.542	1.39431	0.00131906
ENSRNOG00000042078	Icam4	ensembl	10.9464	2.14196	0.212878	0.00132301
ENSRNOG00000053025	AC130391.3	ensembl	1339.39	1742	1.30324	0.00132336
ENSRNOG00000031210	Vom1r48	ensembl	0	4.57048	37.443	0.00132456
ENSRNOG00000012001	Vps37a	ensembl	497.878	355.069	0.714343	0.00137384
ENSRNOG00000047505	Tubb4a	ensembl	7836.6	10123.5	1.2936	0.00138564
ENSRNOG00000012819	Gdnf	ensembl	6.6642	0.619889	0.109959	0.0013917
ENSRNOG00000029165	Stx1a	ensembl	288.118	166.587	0.580039	0.00139278
ENSRNOG00000026488	Gltpd2	ensembl	787.074	1054.56	1.34144	0.00141559
ENSRNOG00000019175	Ercc6l2	ensembl	1660.19	1285.01	0.774904	0.0014582
ENSRNOG00000011521	Filip1	ensembl	778.644	1007.62	1.29546	0.00145843
ENSRNOG00000060332	7SK	ensembl	1042.3	1741.26	1.6749	0.00146482
ENSRNOG00000019634	Eif4e2	ensembl_havana	658.422	857.616	1.30448	0.0014712
ENSRNOG00000032414	Tmem161b	ensembl	490.337	323.134	0.661672	0.00148331
ENSRNOG00000043019	RGD1559732	ensembl	5.44624	0.296242	0.0787038	0.00152636
ENSRNOG00000004341	LOC498222	ensembl	5.44624	0.323647	0.0790094	0.00153068
ENSRNOG00000055766	AABR07044415.1	ensembl	4.84091	15.7958	3.23103	0.00153571
ENSRNOG00000014619	Dhx38	ensembl	1309.25	1700.36	1.30102	0.00155088
ENSRNOG00000033176	Zrsr2	ensembl	1691.36	2283.04	1.35061	0.00155654
ENSRNOG00000057862	Rsph1	ensembl	106.276	37.2319	0.352915	0.00156735
ENSRNOG00000005770	Sostdc1	ensembl	103.735	9.83881	0.0964088	0.00157302
ENSRNOG00000001769	Tnk2	ensembl	1454.55	1836.64	1.26481	0.00158517
ENSRNOG00000024961	Usp35	ensembl	294.526	417.091	1.41824	0.00159419
ENSRNOG00000027152	N4bp2	ensembl	397.391	278.426	0.701146	0.00162073
ENSRNOG00000014319	Smchd1	ensembl	2823.16	2234.24	0.792308	0.00162729
ENSRNOG00000019918	Coasy	ensembl	415.63	573.647	1.37982	0.00163075
ENSRNOG00000052687	Megf8	ensembl	1315.07	1724.71	1.31377	0.00164718
ENSRNOG00000019506	Dnajb2	ensembl	2764.03	3505.19	1.2704	0.00165117
ENSRNOG00000012428	Maf	ensembl	194.318	294.41	1.52112	0.00165389
ENSRNOG00000054539	Hist1h2ail1	ensembl	75.3091	37.4233	0.497183	0.00168925
ENSRNOG00000019184	Npr3	ensembl	285.623	171.95	0.602593	0.00171016
ENSRNOG00000030235	AABR07065823.1	ensembl	15.5631	0	0.0079837	0.00176633
ENSRNOG00000046899	AABR07031972.1	ensembl	120.959	211.788	1.76315	0.00176686
ENSRNOG00000027791	AABR07015346.1	ensembl	478.409	335.463	0.702964	0.00181895
ENSRNOG00000061544	Spock2	ensembl	1659.15	2133.73	1.28836	0.0018254
ENSRNOG00000003809	Sat1	ensembl	3215.06	4024.26	1.25336	0.00183636
ENSRNOG00000014624	Selk	ensembl	1322.43	1763.18	1.33561	0.00184335
ENSRNOG00000027264	Dagla	ensembl	231.382	339.72	1.46802	0.00188121
ENSRNOG00000007431	Shroom1	ensembl	48.4602	25.0685	0.519418	0.00188404
ENSRNOG00000002151	LOC103693564	ensembl	1954.37	2457.43	1.25953	0.00188577
ENSRNOG00000026963	Hsp90b1	ensembl	36675.1	45487.3	1.2419	0.00189231
ENSRNOG00000022245	Msantd4	ensembl	4239.47	5326.27	1.25769	0.00189761
ENSRNOG00000046832	Rn50_X_0745.4	havana	1930.17	2486.36	1.28963	0.00190353
ENSRNOG00000008075	Ift74	ensembl	1493.65	1903.18	1.27618	0.00190737
ENSRNOG00000024923	Nnat	ensembl	7658.66	9523	1.24506	0.0019133
ENSRNOG00000021182	Sv2a	ensembl	7634.06	9421.19	1.23579	0.00191555
ENSRNOG00000050854	LOC100912455	ensembl	102.51	60.5843	0.591729	0.00192359
ENSRNOG00000004628	Dazap2	ensembl	445.495	326.609	0.734196	0.00194831
ENSRNOG00000022796	Fgfbp3	ensembl	434.877	576.402	1.32788	0.00195689
ENSRNOG00000027935	Lrrc34	ensembl	155.26	62.8943	0.407063	0.00196819
ENSRNOG00000005772	Hacd4	ensembl	86.9929	48.9285	0.561335	0.0019743
ENSRNOG00000019568	Jund	ensembl	913.058	1269.21	1.39329	0.00201072
ENSRNOG00000015708	E2f4	ensembl	381.496	511.519	1.34223	0.00203908
ENSRNOG00000008593	Ryk	ensembl	757.879	572.238	0.756766	0.00204148
ENSRNOG00000053659	RGD1311703	ensembl	4876.1	6053.92	1.24339	0.00204519
ENSRNOG00000052787	Rsl24d1	ensembl	1872.56	2369.04	1.26735	0.00205112
ENSRNOG00000012932	Ccdc146	ensembl	64.7079	15.6221	0.244745	0.00206498
ENSRNOG00000002185	Pgm2	ensembl_havana	551.347	405.556	0.736627	0.00207476
ENSRNOG00000033177	AC118841.1	ensembl	905.193	1277.93	1.41573	0.00211797
ENSRNOG00000007875	Actr6	ensembl	885.473	682.984	0.772226	0.00214343
ENSRNOG00000011876	Fxr2	ensembl	2438.75	3220.42	1.32264	0.00219637
ENSRNOG00000031889	Rpl6-ps1	ensembl	4445.41	6887.02	1.55184	0.00220511
ENSRNOG00000004186	Snx13	ensembl	3218.31	2592.57	0.806701	0.00222133
ENSRNOG00000002625	Ptpn4	ensembl	5067.21	4075.5	0.805426	0.00222245
ENSRNOG00000049259	LOC102549842	ensembl	637.762	469.695	0.737292	0.00228709
ENSRNOG00000033502	Ribc2	ensembl	32.9996	5.3366	0.167362	0.00228889
ENSRNOG00000036492	rno-mir-679	ensembl	0	4.59788	37.6622	0.00230489
ENSRNOG00000045961	Lyrm7	ensembl	267.543	377.471	1.416	0.00230558
ENSRNOG00000054840	AABR07053837.1	ensembl	410.011	266.628	0.649679	0.00231234
ENSRNOG00000000768	Ubd	ensembl_havana	3.02579	11.5796	3.63638	0.00232845
ENSRNOG00000007032	Amigo2	ensembl	509.085	353.661	0.694959	0.00233129
ENSRNOG00000021269	Chgb	ensembl	8497.86	10452.5	1.23171	0.00238044
ENSRNOG00000039107	Mfrp	ensembl	217.758	35.7108	0.165084	0.00247476
ENSRNOG00000005519	Grm3	ensembl	1659.66	1312.81	0.791978	0.00248549
ENSRNOG00000022837	Slc25a40	ensembl	178.217	110.986	0.62472	0.00248677
ENSRNOG00000059922	AABR07019442.2	ensembl	0	6.38551	53.0068	0.00249085
ENSRNOG00000014486	Rfx3	ensembl	427.882	304.556	0.713282	0.00250358
ENSRNOG00000059145	AABR07026137.2	ensembl	2.71353	10.5818	3.72032	0.00250399
ENSRNOG00000000814	Fabp7	ensembl	4105.41	5181.65	1.26383	0.00252078
ENSRNOG00000007172	Map4k3	ensembl	1635.11	1220.26	0.747765	0.00254354
ENSRNOG00000054855	AABR07014855.1	ensembl	151.554	278.385	1.83964	0.00258265
ENSRNOG00000033623	Pigx	ensembl	537.957	399.22	0.742583	0.00259107
ENSRNOG00000046428	Lrrc75b	ensembl	772.853	996.34	1.29036	0.0026579
ENSRNOG00000020692	Tmem216	ensembl	261.178	176.155	0.676279	0.00267271
ENSRNOG00000001931	Fgf12	ensembl	1245.71	977.489	0.785293	0.00267824
ENSRNOG00000049556	AABR07071445.1	ensembl	1.73842	8.54518	4.7122	0.00268196
ENSRNOG00000004777	Esf1	ensembl	2406.6	2988.79	1.24317	0.00271806
ENSRNOG00000004150	Slc9a7	ensembl	779.147	562.988	0.723669	0.00274171
ENSRNOG00000055124	AABR07001942.1	ensembl	40.5786	15.6583	0.387417	0.00274771
ENSRNOG00000032828	Mapk8ip2	ensembl	2423.61	3025.99	1.25053	0.00275953
ENSRNOG00000047917	Plscr5	ensembl	24.0586	9.26027	0.392027	0.00276184
ENSRNOG00000012827	Mlf1	ensembl	140.998	33.1736	0.236763	0.00278592
ENSRNOG00000011463	Psmb2	ensembl	741.288	553.683	0.748189	0.002793
ENSRNOG00000030371	Mt-co2	insdc	128813	161909	1.25846	0.00282628
ENSRNOG00000018969	Gpatch4	ensembl	473.016	654.814	1.38807	0.0028375
ENSRNOG00000032668	AABR07007130.1	ensembl	257.635	173.431	0.674106	0.00284581
ENSRNOG00000021099	Lysmd1	ensembl	372.405	506.9	1.36503	0.00286906
ENSRNOG00000003980	Ttc1	ensembl	1912.99	2398.13	1.25477	0.00287434
ENSRNOG00000049696	Rsph4a	ensembl	70.8284	11.5792	0.165704	0.00287553
ENSRNOG00000030351	AABR07006627.1	ensembl	1940.03	2504.91	1.29276	0.00291584
ENSRNOG00000011586	Ccnl1	ensembl	989.648	761.972	0.770923	0.00292516
ENSRNOG00000061244	U6	ensembl	0	4.37912	36.5529	0.00294667
ENSRNOG00000013389	Rgs7bp	ensembl	371.924	210.557	0.567774	0.00297206
ENSRNOG00000003626	Atp5h	ensembl	4201.65	5266.13	1.25528	0.00299825
ENSRNOG00000059655	RGD1564855	ensembl	344.869	521.574	1.51412	0.00300059
ENSRNOG00000000860	Vwa7	ensembl_havana	7.33078	20.5581	2.7937	0.00300266
ENSRNOG00000043445	Them5	ensembl	2.1082	8.97749	4.13143	0.00301497
ENSRNOG00000026813	AABR07044933.1	ensembl	215.853	303.929	1.4109	0.0030299
ENSRNOG00000037060	Odf3b	ensembl	27.2727	7.64203	0.287448	0.00303147
ENSRNOG00000030563	AABR07013798.1	ensembl	11.4623	2.85753	0.262452	0.00305488
ENSRNOG00000007628	Ptp4a3	ensembl	351.265	472.743	1.34953	0.00306283
ENSRNOG00000046330	Rnf130	ensembl	1218.69	951.616	0.781748	0.00306596
ENSRNOG00000023126	Rxfp3	ensembl	583.657	774.456	1.32749	0.00310605
ENSRNOG00000061801	SNORA25	ensembl	11.4978	3.19416	0.28262	0.00312411
ENSRNOG00000009785	Cdkn3	ensembl	69.6904	36.4621	0.526196	0.00312957
ENSRNOG00000047134	Gtf2f1	ensembl	2378.16	2986.68	1.25747	0.0031317
ENSRNOG00000021273	Crls1	ensembl	869.287	1130.44	1.30127	0.0031429
ENSRNOG00000032570	Smc1b	ensembl	3.11437	12.3054	3.87382	0.0031509
ENSRNOG00000047471	LOC103689994	ensembl	57.6047	9.2194	0.163102	0.00316512
ENSRNOG00000019834	Hsp90ab1	ensembl	41007.7	50142.8	1.22437	0.00319867
ENSRNOG00000018932	Ccdc124	ensembl	840.577	1105.32	1.31799	0.00319973
ENSRNOG00000013493	Psma4	ensembl	5619.12	6912.8	1.23179	0.00320625
ENSRNOG00000012450	Dynlrb2	ensembl	148.746	30.0636	0.203524	0.00320925
ENSRNOG00000036585	Cfap43	ensembl	518.959	107.288	0.207489	0.00321269
ENSRNOG00000006238	Traf2	ensembl	232.509	156.865	0.675948	0.00321319
ENSRNOG00000015977	Zfp609	ensembl	945.301	1196.91	1.26756	0.00321599
ENSRNOG00000037718	Cfap52	ensembl	131.534	55.6622	0.426669	0.00321701
ENSRNOG00000031852	Lsamp	ensembl	3055.11	3750.35	1.22923	0.00321738
ENSRNOG00000061301	AC096239.3	ensembl	38.9062	18.5739	0.476598	0.00324569
ENSRNOG00000000587	Rpf2	ensembl	739.847	943.494	1.27759	0.00324589
ENSRNOG00000003895	Rgs1	ensembl	37.1102	66.9447	1.79644	0.00324948
ENSRNOG00000020225	Dlgap4	ensembl	428.299	559.36	1.30693	0.00325287
ENSRNOG00000006578	Odf1	ensembl	0.331428	4.85326	10.5656	0.00328263
ENSRNOG00000033815	AC142181.1	ensembl	11.3782	2.88445	0.256739	0.00329462
ENSRNOG00000014891	Ptar1	ensembl	536.731	399.477	0.745971	0.00329772
ENSRNOG00000052724	AABR07066820.1	ensembl	3.75805	0	0.0318224	0.00331702
ENSRNOG00000019330	Procr	ensembl	138.94	214.587	1.54597	0.00333575
ENSRNOG00000010186	Cdv3	ensembl	1225.17	1606.62	1.31319	0.00337695
ENSRNOG00000032516	Cks1l	ensembl	22.7365	7.85983	0.346081	0.00338671
ENSRNOG00000001517	Pdk1	ensembl	464.878	316.408	0.682121	0.00339255
ENSRNOG00000011300	Lama3	ensembl	191.621	107.773	0.565649	0.00342365
ENSRNOG00000053909	7SK	ensembl	765.301	379.528	0.497343	0.00343836
ENSRNOG00000019666	Ubxn1	ensembl	2716.06	3401.48	1.25436	0.00344716
ENSRNOG00000049020	Tceal6	ensembl	1331.57	1677.97	1.26125	0.00345207
ENSRNOG00000006939	Ndufa7	ensembl	307.042	199.23	0.650484	0.00348296
ENSRNOG00000048193	Hnrnph3	ensembl	1542.39	1947.61	1.2643	0.00354388
ENSRNOG00000043186	Ppil6	ensembl	76.6926	40.3708	0.529768	0.00354479
ENSRNOG00000023077	Cpne9	ensembl	94.3991	53.036	0.566317	0.00355449
ENSRNOG00000020358	Ptov1	ensembl	732.223	519.918	0.711299	0.00356513
ENSRNOG00000002912	Parn	ensembl	506.651	374.554	0.740434	0.00357791
ENSRNOG00000018336	Eps8l2	ensembl	89.1303	38.6905	0.436681	0.00360281
ENSRNOG00000014893	Wdr63	ensembl	154.967	49.4171	0.320838	0.00362477
ENSRNOG00000025502	Arhgef37	ensembl	210.633	297.148	1.4113	0.00362701
ENSRNOG00000013874	LOC100360522	ensembl	5634.36	7485.88	1.33076	0.00362852
ENSRNOG00000057344	AABR07051733.2	ensembl	12.2628	0	0.00997651	0.00363617
ENSRNOG00000032729	Bex2	ensembl	5989.86	7431.25	1.242	0.00364075
ENSRNOG00000008626	Manea	ensembl	980.284	770.285	0.786832	0.00364959
ENSRNOG00000007883	Timm10	ensembl	582.943	744.144	1.27849	0.00366131
ENSRNOG00000020350	Pacs1	ensembl	436.058	309.812	0.710745	0.00367017
ENSRNOG00000031655	Six6os1	ensembl	3.96984	0	0.0297097	0.0036836
ENSRNOG00000033299	Mt-atp8	insdc	31277.2	43656.6	1.39735	0.00368703
ENSRNOG00000006410	Akap5	ensembl	826.606	1097.24	1.32837	0.0036882
ENSRNOG00000014352	Smim12	ensembl	385.493	526.808	1.37098	0.00371583
ENSRNOG00000003011	Gadd45gip1	ensembl	767.896	977.592	1.27486	0.00373244
ENSRNOG00000009057	Sec62	ensembl	7834.79	9735.33	1.24397	0.00375682
ENSRNOG00000000964	AABR07036087.1	ensembl	859.543	1171.65	1.36627	0.00375828
ENSRNOG00000016838	Pla2g5	ensembl	69.2341	11.699	0.171736	0.00377843
ENSRNOG00000019754	Gdap2	ensembl	733.816	572.629	0.781277	0.00380234
ENSRNOG00000004262	LOC102546716	ensembl	1192.59	1513.17	1.27115	0.00383037
ENSRNOG00000019075	Stat5b	ensembl	725.585	566.537	0.781511	0.00383532
ENSRNOG00000061194	AABR07003751.1	ensembl	29.9814	7.76231	0.265074	0.00386385
ENSRNOG00000024425	LOC100910636	ensembl	34.5063	14.7195	0.428156	0.00388228
ENSRNOG00000001152	Glp1r	ensembl	107.16	174.119	1.62357	0.00390394
ENSRNOG00000061093	U5	ensembl	8.80718	1.6317	0.195399	0.00394147
ENSRNOG00000053565	Cfap58l1	ensembl_havana	8.47947	0.943536	0.128028	0.00396366
ENSRNOG00000054183	MIMT1_1	ensembl	162.308	235.464	1.45527	0.00398225
ENSRNOG00000021656	RGD1359334	ensembl	0.400833	4.77152	10.3972	0.0040072
ENSRNOG00000003213	Helz	ensembl	1038.94	815.932	0.78627	0.00407829
ENSRNOG00000029572	Apeh	ensembl	598.869	436.573	0.730368	0.0040819
ENSRNOG00000003741	Nptx1	ensembl	519.563	389.483	0.751008	0.00408599
ENSRNOG00000011573	Csad	ensembl	536.801	740.246	1.3813	0.00409812
ENSRNOG00000048109	LOC100365839	ensembl	6689.33	8289.94	1.24126	0.00411208
ENSRNOG00000055925	Zc3h7b	ensembl	4644.16	5677.42	1.22405	0.00411839
ENSRNOG00000018841	Sox8	ensembl	679.801	893.364	1.31771	0.00414304
ENSRNOG00000053875	Nacad	ensembl	1001.98	1290.82	1.29108	0.0041541
ENSRNOG00000013654	Cbln2	ensembl	1040.55	764.707	0.734899	0.00415423
ENSRNOG00000015581	Dnah6	ensembl	164.467	36.1414	0.221366	0.00416309
ENSRNOG00000022485	Chuk	ensembl	1342.68	1040.17	0.775863	0.00416607
ENSRNOG00000029360	Serinc1	ensembl	14895.2	12095	0.812996	0.00421988
ENSRNOG00000010311	Dzip1	ensembl	4567.92	5581.41	1.22346	0.00422132
ENSRNOG00000057165	Igkv7-33	ensembl	15.2317	0	0.00814753	0.004232
ENSRNOG00000061336	U1	ensembl	3.67319	13.7592	3.84149	0.00424095
ENSRNOG00000015310	Lrrc32	ensembl	142.988	209.909	1.46939	0.00425891
ENSRNOG00000048848	Ccdc9	ensembl	310.17	454.846	1.46516	0.00426286
ENSRNOG00000021109	Ccdc114	ensembl	71.4298	19.1414	0.271255	0.00427366
ENSRNOG00000014030	Synm	ensembl_havana	3726.88	4735.88	1.2729	0.00429654
ENSRNOG00000039528	Fam32a	ensembl	1278.85	1585.5	1.24196	0.00429807
ENSRNOG00000059883	AABR07052758.1	ensembl	1311.39	1624.97	1.24074	0.00432341
ENSRNOG00000002364	Rnf112	ensembl	1003.94	1291.85	1.28916	0.00433196
ENSRNOG00000061508	Reps2	ensembl	466.963	331.579	0.711175	0.00435635
ENSRNOG00000003952	Map3k19	ensembl	103.023	18.6177	0.182655	0.00436518
ENSRNOG00000014459	Phax	ensembl	2087.29	2588.06	1.24117	0.00440119
ENSRNOG00000057872	U7	ensembl	3.89314	0	0.0300752	0.00443088
ENSRNOG00000024435	Wbscr17	havana	122.703	77.6384	0.631899	0.00443583
ENSRNOG00000000161	Chm	ensembl	1082.49	841.218	0.778023	0.00444815
ENSRNOG00000002775	Npl	ensembl	280.938	196.304	0.700609	0.0044622
ENSRNOG00000004124	Grpr	ensembl	79.3984	124.186	1.56458	0.0045085
ENSRNOG00000010643	Kank2	ensembl	1496.39	1872.93	1.25352	0.00452176
ENSRNOG00000059479	Adcy1	ensembl	562.819	413.549	0.737349	0.00453605
ENSRNOG00000003386	Rbfox3	ensembl	341.469	473.204	1.38725	0.00453956
ENSRNOG00000029886	Hba-a3	ensembl	6695.61	5303.77	0.793062	0.0045425
ENSRNOG00000033734	Tnnt2	ensembl	562.96	866.881	1.53965	0.0045579
ENSRNOG00000011777	Spag5	ensembl	365.501	481.764	1.32009	0.00460583
ENSRNOG00000017836	Rrp36	ensembl	207.972	130.939	0.632076	0.00463034
ENSRNOG00000011439	Grk5	ensembl	448.141	333.345	0.744115	0.0046671
ENSRNOG00000031706	RGD1563601	ensembl	5374.48	6623.5	1.23402	0.00467857
ENSRNOG00000047143	Fkbp1b	ensembl	710.24	894.888	1.2614	0.00471631
ENSRNOG00000019995	Dnajc18	ensembl	2264.49	2766.36	1.22338	0.00472225
ENSRNOG00000040279	Slf1	ensembl	851.566	677.005	0.795968	0.00472781
ENSRNOG00000000569	MGC112715	ensembl	470.808	355.921	0.756555	0.00476663
ENSRNOG00000003472	Atp11c	ensembl	1190.15	648.212	0.546277	0.00477407
ENSRNOG00000036859	Gdpd5	ensembl	161.391	233.237	1.44736	0.00478054
ENSRNOG00000012012	Pinx1	ensembl	186.172	261.907	1.40955	0.00481257
ENSRNOG00000059113	AABR07019085.1	ensembl	1098.97	805.664	0.734323	0.00485269
ENSRNOG00000052373	Vault	ensembl	18.6587	38.175	2.02014	0.00487428
ENSRNOG00000057122	AABR07036514.1	ensembl	0	3.55867	29.4569	0.00488786
ENSRNOG00000004312	Tmbim4	ensembl	575.847	381.608	0.664765	0.00491068
ENSRNOG00000050367	AABR07019093.1	ensembl	12.5232	3.23599	0.261651	0.00491827
ENSRNOG00000042068	Otud7b	ensembl	2830.98	3522.6	1.24658	0.00492586
ENSRNOG00000007371	Rbmx2	ensembl	452.253	580.655	1.28559	0.00494653
ENSRNOG00000019965	Tgfb1i1	ensembl	172.821	260.298	1.5025	0.00494685
ENSRNOG00000059492	Zfp160	ensembl	686.15	536.422	0.783336	0.00495274
ENSRNOG00000023661	Celf2	ensembl	571.131	430.643	0.754587	0.00499324
ENSRNOG00000014007	Gfod1	ensembl	214.18	297.384	1.39175	0.00499477
ENSRNOG00000032840	Sumo4	ensembl	1046.16	1371.62	1.31415	0.00499618
ENSRNOG00000001177	Acads	ensembl	101.521	58.3513	0.577756	0.00500003
ENSRNOG00000031313	AC103024.1	ensembl	36.3107	68.407	1.90446	0.00503282
ENSRNOG00000031364	Kif1c	ensembl	2456.58	3098.93	1.26395	0.00509248
ENSRNOG00000028041	Tnnt1	ensembl	260.507	37.6714	0.145529	0.00511093
ENSRNOG00000019902	Folr1	ensembl	147.511	19.0702	0.13047	0.00512604
ENSRNOG00000013240	Ptger4	ensembl	67.0806	106.439	1.58333	0.00513704
ENSRNOG00000011268	Chd5	ensembl	4305.51	5284.95	1.22917	0.00518674
ENSRNOG00000020093	LOC100360573	ensembl	3282.59	4131.11	1.26049	0.00519608
ENSRNOG00000045622	Spaca5	ensembl	52.3269	27.5918	0.526084	0.00520878
ENSRNOG00000008225	AABR07064349.1	ensembl	70.9881	24.7352	0.348455	0.00521152
ENSRNOG00000013920	Arhgap26	ensembl	745.012	554.633	0.744603	0.00521156
ENSRNOG00000009635	Tmem74b	ensembl	25.3431	10.513	0.417265	0.00524425
ENSRNOG00000000657	Nek7	ensembl	790.875	605.503	0.767434	0.00529883
ENSRNOG00000048174	Uqcrq	ensembl	2725.76	3905.68	1.43533	0.00531023
ENSRNOG00000017956	Golga7	ensembl	2361.8	1924.14	0.815877	0.00532513
ENSRNOG00000010830	Slc25a4	ensembl	29147.1	35242.9	1.21075	0.00534949
ENSRNOG00000011990	AC110488.1	ensembl	4.4438	14.0727	3.26359	0.00535581
ENSRNOG00000036826	Glycam1	ensembl	41.5095	1.53602	0.0405494	0.00535806
ENSRNOG00000011969	Dock9	ensembl	3681.18	2982.54	0.811539	0.00539287
ENSRNOG00000015182	Ppp2cb	ensembl	2173.35	1717.51	0.791041	0.00540917
ENSRNOG00000047535	AABR07051670.1	ensembl	10.7219	0.592484	0.0694656	0.00542091
ENSRNOG00000004089	Enpp2	ensembl	10130.6	4496.9	0.444887	0.00543193
ENSRNOG00000025145	Rmdn1	ensembl	882.412	703.346	0.798161	0.00543486
ENSRNOG00000008664	Rn50_15_0083.1	havana	3646.41	4409.12	1.21087	0.00545997
ENSRNOG00000060436	Vti1b	ensembl	2012.99	2460.07	1.2236	0.00546979
ENSRNOG00000016955	Fam188a	ensembl	561.541	423.449	0.755961	0.00549779
ENSRNOG00000002932	Wdr19	ensembl	1046.3	760.954	0.72898	0.0055054
ENSRNOG00000006876	Msx1	ensembl	109.764	29.6492	0.272706	0.00552495
ENSRNOG00000047319	Caprin2	ensembl	3478.99	4400.93	1.26649	0.00553642
ENSRNOG00000012906	Bcas1	ensembl	9509.67	12175.6	1.28238	0.00553797
ENSRNOG00000053332	Cdh26	ensembl	5.6307	0.337108	0.0778769	0.00554716
ENSRNOG00000053076	AABR07027478.3	ensembl	3.3107	11.8856	3.69267	0.00557134
ENSRNOG00000021434	Usp51	ensembl	102.29	156.016	1.52117	0.00557404
ENSRNOG00000019592	Iqca1	ensembl	81.6093	42.608	0.525366	0.00559061
ENSRNOG00000025287	RGD1565611	ensembl	49.7808	7.42753	0.151953	0.00560032
ENSRNOG00000052977	LOC103690033	ensembl	602.257	450.944	0.750194	0.00563223
ENSRNOG00000009716	Casc3	ensembl	1577.69	1957.12	1.242	0.00563761
ENSRNOG00000053773	AABR07049792.1	ensembl	7.35811	1.26718	0.184169	0.00566769
ENSRNOG00000048088	Mest	ensembl	782.435	612.841	0.783333	0.00569516
ENSRNOG00000049912	Atp5e	ensembl	2747.82	3358.1	1.22402	0.00570857
ENSRNOG00000058093	SNORD59	ensembl	15.517	5.74198	0.374952	0.00572105
ENSRNOG00000007830	Apold1	ensembl	237.036	337.867	1.42591	0.00573356
ENSRNOG00000020894	Lsm12	ensembl	1330.09	1633.73	1.23015	0.0057463
ENSRNOG00000014322	Kazn	ensembl	368.721	498.042	1.35383	0.00575962
ENSRNOG00000060270	Mir224	ensembl	0	3.19464	26.7173	0.00576168
ENSRNOG00000029330	Car5b	ensembl	238.948	334.058	1.39842	0.00576821
ENSRNOG00000010353	Dnajb6	ensembl	935.452	1173.78	1.25575	0.00577794
ENSRNOG00000005404	Rasgrp1	ensembl	2279.31	1796.4	0.78944	0.00579082
ENSRNOG00000020763	Snrnp70	ensembl	2869.1	3721.98	1.29968	0.00583871
ENSRNOG00000014190	Hint3	ensembl	292.449	205.894	0.703846	0.00583894
ENSRNOG00000020479	Pik3c2a	ensembl	3556.03	2939.21	0.827654	0.00588875
ENSRNOG00000061650	Cdhr4	ensembl	55.4726	10.5683	0.193531	0.00594864
ENSRNOG00000021725	Unc119b	ensembl	4095.91	4978.6	1.21709	0.00595646
ENSRNOG00000049212	Olr1579	ensembl	3.35721	0	0.0351158	0.00600146
ENSRNOG00000010728	Stradb	ensembl	438.33	321.722	0.736283	0.00601309
ENSRNOG00000029042	Mt-nd6	insdc	8578.89	13765.3	1.60557	0.00602905
ENSRNOG00000058486	AABR07021220.1	ensembl	2933.25	3649.44	1.24547	0.0060689
ENSRNOG00000021229	Avp	ensembl	17611.8	23547.6	1.33902	0.00606942
ENSRNOG00000016910	Ralgps1	ensembl	782.491	614.865	0.786715	0.00608346
ENSRNOG00000029594	AABR07064000.1	ensembl	237.093	353.107	1.49517	0.00608878
ENSRNOG00000042195	Pabpn1	ensembl	1088.91	1381.95	1.26979	0.00615839
ENSRNOG00000017841	Fam192a	ensembl	890.363	1109.55	1.24789	0.00619413
ENSRNOG00000010412	Ccdc180	ensembl	111.295	36.9444	0.334644	0.00622639
ENSRNOG00000017446	Ndufs8	ensembl	429.135	309.53	0.721386	0.00627461
ENSRNOG00000016275	Ttr	ensembl	23359.7	896.305	0.0384624	0.00629212
ENSRNOG00000015670	Stx7	ensembl	1819.25	1458.34	0.802874	0.00629945
ENSRNOG00000007957	Bzrap1	ensembl	889.279	1127.19	1.27048	0.00632751
ENSRNOG00000061519	Asap2	ensembl	496.155	372.036	0.752137	0.00637084
ENSRNOG00000050910	Hmgb3	ensembl_havana	228.307	316.032	1.38547	0.00637249
ENSRNOG00000025860	Drc7	ensembl	56.7874	10.4629	0.186535	0.00637314
ENSRNOG00000028439	Olr1667	ensembl	0.955933	6.49841	5.74296	0.00637465
ENSRNOG00000019394	Mpv17l2	ensembl	52.9853	29.6362	0.564534	0.00638435
ENSRNOG00000052345	AABR07061453.1	ensembl	7.64303	1.64516	0.223363	0.00640223
ENSRNOG00000015812	Tm4sf1	ensembl	661.696	856.835	1.29573	0.00644921
ENSRNOG00000017090	RGD1308706	ensembl	693.159	903.842	1.30614	0.00648056
ENSRNOG00000031960	LOC102548369	ensembl	683.579	932.658	1.36891	0.00650747
ENSRNOG00000016920	Spire2	ensembl	300.019	433.63	1.44786	0.00653118
ENSRNOG00000027126	Dpy30	ensembl	522.69	322.687	0.61944	0.0065312
ENSRNOG00000002871	Rbm25l1	ensembl	1695.83	2141.93	1.26433	0.00653621
ENSRNOG00000002057	Slc10a6	ensembl	34.762	17.7646	0.516367	0.00655141
ENSRNOG00000047931	Tmsb4x	ensembl	20543.3	24851.2	1.21144	0.00657991
ENSRNOG00000017208	Cspg4	ensembl	681.996	855.682	1.2566	0.00658159
ENSRNOG00000002595	Dpp10	ensembl	1737.9	1405.51	0.809932	0.00658497
ENSRNOG00000021177	Cox8a	ensembl	783.461	602.989	0.769451	0.00660823
ENSRNOG00000000699	Selplg	ensembl	165.359	249.819	1.51473	0.00660907
ENSRNOG00000017801	Atf4	ensembl_havana	5546.6	6710.31	1.21141	0.00668367
ENSRNOG00000026870	Clic6	ensembl	625.572	177.246	0.284414	0.00670552
ENSRNOG00000020165	Ahsp	ensembl	25.9393	10.7948	0.41833	0.00670948
ENSRNOG00000029549	Eci2	ensembl	984.327	776.113	0.789538	0.00672075
ENSRNOG00000056870	Gdi1	ensembl	9283.45	11425.2	1.23255	0.00672465
ENSRNOG00000050767	Nrn1	ensembl	890.547	1149.83	1.29294	0.00673402
ENSRNOG00000014684	Npr1	ensembl	223.235	149.459	0.671139	0.00673524
ENSRNOG00000018955	Olr286	ensembl	1.2025	7.22319	6.26186	0.0067694
ENSRNOG00000057548	AABR07051741.1	ensembl	5.80428	0	0.0214106	0.00679873
ENSRNOG00000056610	Cog5	ensembl	551.583	399.674	0.725493	0.00681311
ENSRNOG00000018566	Ctsl	ensembl	5939.37	7184.72	1.21157	0.00686671
ENSRNOG00000000867	Vars	ensembl_havana	943.394	1167.23	1.23862	0.00687431
ENSRNOG00000009946	Ldlr	ensembl	1423.81	1780.11	1.25265	0.00687433
ENSRNOG00000013454	Rala	ensembl	1708.43	2146.14	1.25795	0.00688176
ENSRNOG00000015939	Ccdc25	ensembl	2648.09	3277.97	1.2389	0.00690255
ENSRNOG00000019819	Dus2	ensembl	382.606	280.368	0.734569	0.0069326
ENSRNOG00000054782	Ppp3cb	ensembl	2786.46	2235.18	0.802961	0.00694102
ENSRNOG00000001980	Ugt2b35	ensembl_havana	6.33649	0.970941	0.169565	0.00700909
ENSRNOG00000042729	Efhc1	ensembl	125.443	67.4068	0.541125	0.00701506
ENSRNOG00000005809	Arhgdib	ensembl	685.314	885.536	1.29419	0.00702209
ENSRNOG00000029707	Mt-nd4	insdc	36111.5	53307.8	1.47731	0.00703374
ENSRNOG00000008372	Vamp7	ensembl	635.58	452.156	0.713423	0.00705418
ENSRNOG00000029304	Aggf1	ensembl	861.326	687.887	0.799008	0.00707023
ENSRNOG00000010028	Polr3d	ensembl	802.634	1021.12	1.27435	0.00707098
ENSRNOG00000030404	Arrb1	ensembl	1053.76	818.602	0.777762	0.00708312
ENSRNOG00000014235	Zgpat	ensembl	812.08	1010.49	1.24579	0.00711812
ENSRNOG00000008945	Nans	ensembl	919.997	1154.49	1.25583	0.00712184
ENSRNOG00000034130	Hmg1l1	ensembl	1247.21	1587.58	1.27447	0.00713771
ENSRNOG00000015232	Pip5k1b	ensembl_havana	305.182	204.051	0.671774	0.00714944
ENSRNOG00000018904	Dtymk	ensembl	845.474	1053.97	1.24788	0.00721583
ENSRNOG00000020061	Tmem198	ensembl	58.6167	93.1496	1.58405	0.00724233
ENSRNOG00000005951	AABR07052085.1	ensembl	1451.47	1798.74	1.24026	0.0072515
ENSRNOG00000026295	Rbpjl	ensembl	16.9705	33.1448	1.93147	0.00730814
ENSRNOG00000058135	AABR07045403.1	ensembl	5.25734	0	0.0235463	0.00731748
ENSRNOG00000046889	Dbi	ensembl	6958.98	8678.61	1.24916	0.00732196
ENSRNOG00000055848	U1	ensembl	4.89114	14.0034	2.84949	0.00732594
ENSRNOG00000055161	snoU2-30	ensembl	0.400833	4.55653	9.79298	0.00733861
ENSRNOG00000009872	Kcnh2	ensembl	448.709	575.52	1.28502	0.00734566
ENSRNOG00000009297	Chchd1	ensembl	468.902	352.955	0.753445	0.00735173
ENSRNOG00000060721	SNORD113	ensembl	50.6579	84.7896	1.67345	0.00735259
ENSRNOG00000051369	SNORA26	ensembl	14.1922	5.08123	0.361434	0.00735545
ENSRNOG00000008716	Nefh	ensembl	3543.95	4386.57	1.23945	0.0073712
ENSRNOG00000017854	Ucp2	ensembl	326.456	441.648	1.35587	0.00739218
ENSRNOG00000047697	Ggt1	ensembl	7.96258	19.8416	2.47363	0.007472
ENSRNOG00000035625	Mir3592	ensembl	29.7868	14.3679	0.480956	0.0074931
ENSRNOG00000008738	Tp53i11	ensembl	1567.45	1987.11	1.26996	0.00749847
ENSRNOG00000015496	Tpm4	ensembl	1725.82	2224.31	1.29047	0.00751992
ENSRNOG00000035638	Mir195	ensembl	0	3.70491	31.2486	0.00752462
ENSRNOG00000008249	Brms1l	ensembl_havana	363.546	261.53	0.71958	0.00753502
ENSRNOG00000015292	Cul2	ensembl	2216.92	1793.86	0.809971	0.00754492
ENSRNOG00000002831	Wfikkn2	ensembl	236.39	90.6882	0.385609	0.00754636
ENSRNOG00000016100	Tbca	ensembl	246.583	349.403	1.41586	0.0075532
ENSRNOG00000041600	AABR07049764.1	ensembl	4.3515	0.337108	0.097591	0.00755769
ENSRNOG00000001816	Rfc4	ensembl	232.079	162.875	0.702673	0.0075624
ENSRNOG00000016255	Podxl2	ensembl	1718.11	2201.19	1.28235	0.00756677
ENSRNOG00000033434	Casp12	ensembl	246.653	343.716	1.39476	0.0075792
ENSRNOG00000056257	Cacng7	ensembl	543.149	695.117	1.28205	0.00758397
ENSRNOG00000010958	Prdx3	ensembl	1469.71	1154.31	0.786493	0.0075912
ENSRNOG00000023895	Ube2u	ensembl	31.3814	11.3344	0.37002	0.00759502
ENSRNOG00000039777	Ttf1	ensembl	673.152	830.618	1.23567	0.0075954
ENSRNOG00000055845	snoU2-30	ensembl	88.9955	135.752	1.5324	0.00771087
ENSRNOG00000010408	Polr2k	ensembl	1107.56	1473.55	1.33406	0.00771299
ENSRNOG00000002997	Slc9a3r2	ensembl	1230.01	1516.26	1.2341	0.00771779
ENSRNOG00000010117	Eif3a	ensembl	10919.6	13137.1	1.20464	0.00774132
ENSRNOG00000001691	Cldn14	ensembl	0.662857	6.24256	7.7986	0.00774602
ENSRNOG00000000622	Hint1	ensembl	2236.91	2711.73	1.21426	0.00776172
ENSRNOG00000018997	Myh7b	ensembl	76.9665	126.506	1.65691	0.00778708
ENSRNOG00000006785	Dcaf8	ensembl	3231.89	3906.24	1.21054	0.0078434
ENSRNOG00000022166	Ammecr1	ensembl	47.0468	26.1347	0.555066	0.00786306
ENSRNOG00000001271	Card6	ensembl	439.334	570.794	1.29876	0.00786483
ENSRNOG00000050629	Olr312	ensembl	0	3.94682	33.3464	0.00790452
ENSRNOG00000047387	LOC100912445	ensembl	1193.64	934.248	0.783664	0.00791253
ENSRNOG00000043486	Tnfrsf26	ensembl	38.154	16.0039	0.419648	0.00791478
ENSRNOG00000011419	Aldh6a1	ensembl	2498.93	2037.32	0.816111	0.00795312
ENSRNOG00000007047	Eps8	ensembl	1528.33	1238.97	0.811997	0.00795347
ENSRNOG00000018783	Bcas2	ensembl	1546.97	1904.51	1.23202	0.00795394
ENSRNOG00000016780	RGD1310951	ensembl	946.2	1175.35	1.24342	0.00796959
ENSRNOG00000039323	Dgkk	ensembl	22.8907	10.3129	0.452189	0.0080134
ENSRNOG00000005496	Ing3	ensembl	367.255	267.197	0.728191	0.00804524
ENSRNOG00000050417	AABR07006774.1	ensembl	60.2657	99.4183	1.64961	0.00807376
ENSRNOG00000037113	Slfn2	ensembl_havana	274.548	380.662	1.38809	0.00816646
ENSRNOG00000049964	Rn50_1_2787.2	ensembl_havana	16.4119	6.28014	0.393822	0.00818586
ENSRNOG00000018194	Srrm1	ensembl	992.853	1230.76	1.24112	0.00822058
ENSRNOG00000054900	Pih1d3	ensembl	7.92809	0	0.0156568	0.0082375
ENSRNOG00000037710	Calr4	ensembl	46.5941	89.57	1.93365	0.00824391
ENSRNOG00000009861	LOC100360843	ensembl	4.45926	0.323647	0.0964421	0.00825903
ENSRNOG00000021578	Wfikkn1	ensembl	30.9272	53.6285	1.72352	0.00831762
ENSRNOG00000022946	Slc22a3	ensembl	75.4656	21.483	0.28818	0.00833383
ENSRNOG00000012593	Mmel1	ensembl	126.197	83.7551	0.665322	0.00836502
ENSRNOG00000060335	Strn3	ensembl	4843.55	5812.49	1.2016	0.00842227
ENSRNOG00000056321	AC093965.2	ensembl	5.94295	0.647294	0.126528	0.00844787
ENSRNOG00000010133	Bpgm	ensembl	2544.7	3079.92	1.2121	0.00846989
ENSRNOG00000055806	U2	ensembl	3.49602	0	0.0345717	0.00848037
ENSRNOG00000025787	Spag6	ensembl	108.478	38.6815	0.359633	0.00848042
ENSRNOG00000059539	Tagln3	ensembl	1124	1389.05	1.23793	0.00849195
ENSRNOG00000046955	Cbx6	ensembl	1285.84	1641.62	1.27779	0.00853044
ENSRNOG00000010496	Med17	ensembl	507.225	385.186	0.759996	0.00856063
ENSRNOG00000052596	AABR07013750.1	ensembl	3.29153	0	0.0374945	0.00858451
ENSRNOG00000016306	Adgrv1	ensembl_havana	726.806	521.195	0.719459	0.00858929
ENSRNOG00000029586	Cdhr4	ensembl	46.7319	10.1629	0.221606	0.00859454
ENSRNOG00000004061	Pnn	ensembl	3403.72	4223.32	1.24222	0.00862178
ENSRNOG00000052688	Dnah2	ensembl	87.6647	27.8588	0.321149	0.00863032
ENSRNOG00000017254	Nsun2	ensembl	1525.32	1226.32	0.80518	0.00865861
ENSRNOG00000059613	AABR07065780.1	ensembl	5.00262	0	0.0248212	0.00866419
ENSRNOG00000025251	H1foo	ensembl	5.00262	0	0.0248211	0.00866889
ENSRNOG00000008530	Stoml1	ensembl	684.816	858.525	1.2562	0.00871299
ENSRNOG00000014872	Sec24d	ensembl	278.263	203.448	0.731911	0.00871843
ENSRNOG00000024705	Rarres2	ensembl	673.688	857.206	1.27545	0.00872156
ENSRNOG00000042432	Nek11	ensembl	71.1797	38.5998	0.547916	0.00872846
ENSRNOG00000001652	Erg	ensembl	286.87	379.805	1.32415	0.00877034
ENSRNOG00000003755	Clgn	ensembl	245.723	334.207	1.3637	0.00877721
ENSRNOG00000006632	Rps6ka3	ensembl	1079.36	824.597	0.764517	0.00881084
ENSRNOG00000002110	Fam114a1l1	ensembl	252.607	343.501	1.36316	0.00883509
ENSRNOG00000011540	Vta1	ensembl_havana	841.748	660.392	0.786022	0.00886261
ENSRNOG00000005600	Nr4a2	ensembl	107.119	160.541	1.49979	0.00892414
ENSRNOG00000026914	Dnah1	ensembl	120.953	45.1693	0.375998	0.0089276
ENSRNOG00000016731	Tpm2	ensembl	2753.06	3488.37	1.26901	0.00895185
ENSRNOG00000025735	Wdr86	ensembl	98.2197	62.9532	0.642989	0.00895506
ENSRNOG00000025881	Rbms3	ensembl	320.559	430.588	1.3452	0.00896524
ENSRNOG00000050983	Hpcal4	ensembl	1465.1	1153.5	0.787749	0.00897265
ENSRNOG00000029447	Epc2	ensembl	828.231	662.139	0.80014	0.00901964
ENSRNOG00000053586	SNORD19	ensembl	7.24219	17.0759	2.34727	0.00902775
ENSRNOG00000031766	Mt-cytb	insdc	35987	50609.4	1.40751	0.00902782
ENSRNOG00000022652	LOC100361067	havana	2752.88	3331.62	1.21173	0.00903145
ENSRNOG00000012831	Slc25a26	ensembl	138.378	78.5548	0.567739	0.00903744
ENSRNOG00000024931	Ccdc88b	ensembl	70.5264	107.339	1.52042	0.00909687
ENSRNOG00000045779	Rn50_X_0729.6	havana	1195.95	1482.58	1.24137	0.00910911
ENSRNOG00000047506	LOC100362980	ensembl	707.741	887.443	1.25425	0.0091095
ENSRNOG00000049511	Safb2	ensembl	903.171	1142.61	1.2672	0.00911754
ENSRNOG00000003863	RGD1564093	ensembl	1023.18	1366.02	1.33656	0.0091582
ENSRNOG00000014857	RGD1560065	ensembl	688.992	880.73	1.28122	0.0091771
ENSRNOG00000002791	Bcl2	ensembl	157.506	231.203	1.46401	0.00927944
ENSRNOG00000055605	AABR07052500.1	ensembl	16.1224	6.45707	0.400842	0.0093126
ENSRNOG00000009570	Pdxp	ensembl	627.018	498.141	0.796247	0.00931729
ENSRNOG00000050210	RT1-CE10	ensembl	75.7016	118.906	1.57256	0.00938114
ENSRNOG00000022537	E2f8	ensembl	3.13354	0	0.0383605	0.00939714
ENSRNOG00000000763	RT1-M3-1	ensembl_havana	939.029	1160.84	1.23814	0.00939791
ENSRNOG00000006063	Phf21a	ensembl	3151.88	3849.54	1.22272	0.00942068
ENSRNOG00000000697	Coro1c	ensembl	1879.53	2261.73	1.20476	0.00942325
ENSRNOG00000029131	AABR07024637.1	ensembl	13.0694	2.31937	0.184597	0.00950007
ENSRNOG00000026271	Tmem245	ensembl	577.056	450.671	0.781211	0.00950588
ENSRNOG00000017744	Dram2	ensembl	276.429	190.057	0.689338	0.00953995
ENSRNOG00000006989	Vamp2	ensembl	3910.43	4758.07	1.2182	0.0095623
ENSRNOG00000012271	Cnot1	ensembl	2805.85	2308.37	0.823602	0.00959268
ENSRNOG00000055375	AABR07065837.1	ensembl	6.03511	0	0.0200296	0.00968332
ENSRNOG00000000958	AABR07055943.1	ensembl	105.253	157.589	1.49921	0.00968704
ENSRNOG00000039994	Upf3b	ensembl_havana	1688.4	2059.19	1.22061	0.00969713
ENSRNOG00000000564	Tbata	ensembl	7.12628	18.6129	2.64681	0.00973996
ENSRNOG00000003191	Bhlhb9	ensembl	1709.15	2079.05	1.21752	0.009762
ENSRNOG00000010730	Efcab10	ensembl_havana	36.0326	8.8145	0.250566	0.00986327
ENSRNOG00000019205	Gnpat	ensembl	680.196	543.439	0.800381	0.00986697
ENSRNOG00000058776	Olr1734	ensembl_havana	1.77678	7.83339	4.24481	0.00989556
ENSRNOG00000050701	AABR07007385.1	ensembl	28.7268	50.9665	1.76424	0.00995137
ENSRNOG00000057537	SNORA5	ensembl	28.5104	13.5841	0.480417	0.00995856
ENSRNOG00000037853	Rarres1	ensembl	115.009	75.1138	0.655224	0.00996739
ENSRNOG00000041411	AC097745.1	ensembl	2.82129	9.48824	3.34067	0.00998166
ENSRNOG00000057080	Stra13	ensembl	9.21517	1.32151	0.149846	0.00999119
ENSRNOG00000036841	Cbx5	ensembl	4125.65	4930.44	1.19659	0.00999838
ENSRNOG00000030237	Cox7c	ensembl	2268.2	1865.16	0.823445	0.0100028
ENSRNOG00000017251	Wdr55	ensembl	5328.13	6402.6	1.20308	0.0100189
ENSRNOG00000015380	Jup	ensembl	462.064	587.112	1.27313	0.0100203
ENSRNOG00000025252	Yars2	ensembl	197.184	137.934	0.701456	0.0100439
ENSRNOG00000011606	LOC680385	ensembl	3417.3	4119.04	1.20669	0.010071
ENSRNOG00000009462	Ccdc90b	ensembl	968.763	1235.04	1.27799	0.0100753
ENSRNOG00000050864	LOC100910990	ensembl	350.458	253.577	0.725305	0.0101175
ENSRNOG00000003960	Tmem27	ensembl	68.4383	6.15754	0.0925316	0.0101237
ENSRNOG00000056946	Scaf1	ensembl	454.871	598.029	1.31812	0.0101337
ENSRNOG00000003951	Psmc1	ensembl	5901.97	7045.76	1.19531	0.0101391
ENSRNOG00000041604	Mir1193	ensembl	9.19985	1.53602	0.186086	0.0101405
ENSRNOG00000008432	Slc22a5	ensembl	357.014	265.989	0.747001	0.0101455
ENSRNOG00000018653	Pfdn1	ensembl	3700.77	4628.25	1.25278	0.0101681
ENSRNOG00000058663	Suz12	ensembl	439.845	324.14	0.73722	0.0101948
ENSRNOG00000017781	Dnajc7	ensembl	4828.06	5754.34	1.19338	0.0101972
ENSRNOG00000057729	Strip2	ensembl	327.279	202.943	0.622848	0.0102241
ENSRNOG00000021047	Lrrfip2	ensembl	1658.56	2047.79	1.23563	0.0102385
ENSRNOG00000025639	Slc39a12	ensembl	725.769	578.406	0.798476	0.0102493
ENSRNOG00000053113	Rn50_1_0435.2	havana	30.3795	51.9866	1.72058	0.0102804
ENSRNOG00000027212	Tekt3	ensembl	23.5221	4.33874	0.192758	0.0102954
ENSRNOG00000013916	Nefm	ensembl	2711.04	3413.51	1.26054	0.010299
ENSRNOG00000016842	Pifo	ensembl_havana	20.3118	1.91399	0.100697	0.0103201
ENSRNOG00000023389	Ephx4	ensembl	101.335	55.1697	0.548304	0.0103238
ENSRNOG00000052033	SNORA73	ensembl	6.61411	0.660755	0.116213	0.0103447
ENSRNOG00000009824	Irf2	ensembl	336.733	436.856	1.29991	0.0103989
ENSRNOG00000033916	LOC100363012	ensembl	1679.58	2071.83	1.23615	0.0104591
ENSRNOG00000045753	Hist2h2be	ensembl	42.5045	70.1171	1.65139	0.0104684
ENSRNOG00000054130	uc_338	ensembl	1.02534	5.67371	5.04873	0.0104975
ENSRNOG00000049708	Wdr62	ensembl	3.18005	12.6862	3.67747	0.0105041
ENSRNOG00000033956	Zfp42l	ensembl	6.71443	1.33497	0.203386	0.0105443
ENSRNOG00000027098	Sez6l2	ensembl	2235.85	2732.17	1.2241	0.0105452
ENSRNOG00000006392	Xrcc6	ensembl	931.493	1147.44	1.2339	0.0105764
ENSRNOG00000009886	Fkbp14	ensembl	925.09	1164.52	1.26136	0.0106282
ENSRNOG00000051702	AABR07013558.1	ensembl	1.61879	8.08924	4.48705	0.01068
ENSRNOG00000009351	Srp68	ensembl	568.754	424.96	0.747884	0.0106843
ENSRNOG00000014573	Ckmt1b	ensembl	4782.92	5750.96	1.20373	0.0106875
ENSRNOG00000061216	Tubb5	ensembl_havana	14550.3	17580.8	1.20994	0.0107362
ENSRNOG00000000283	Dgcr14	ensembl	286.778	382.541	1.3366	0.0107377
ENSRNOG00000033688	Cep170b	ensembl	1175.27	1462.39	1.24595	0.0107718
ENSRNOG00000013828	Sirt3	ensembl	418.114	312.311	0.749175	0.0107794
ENSRNOG00000009331	Hck	ensembl	38.8478	20.3566	0.522442	0.0108025
ENSRNOG00000059389	SCARNA13	ensembl	9906.43	6784.93	0.685511	0.0108154
ENSRNOG00000057557	Prlr	ensembl	247.761	151.124	0.613215	0.0108655
ENSRNOG00000016863	Pnmal2	ensembl	7853.04	9397.64	1.19831	0.0109194
ENSRNOG00000012495	Podxl	ensembl	1558.32	1877.92	1.20678	0.0109981
ENSRNOG00000030877	Htr2c	ensembl	3779.11	2933.75	0.777755	0.0110056
ENSRNOG00000018229	Slc45a1	ensembl	527.731	676.123	1.28157	0.0110082
ENSRNOG00000060355	Hist1h1b	ensembl	95.9903	61.1387	0.639688	0.0110103
ENSRNOG00000032715	AABR07010705.1	ensembl	166.1	243.452	1.46943	0.0111629
ENSRNOG00000019587	Ptprn	ensembl	4942.33	5967.53	1.2091	0.0111809
ENSRNOG00000057127	RGD1562673	ensembl	16.8121	1.53602	0.100721	0.0112073
ENSRNOG00000050426	Dnah3	ensembl	37.0043	6.57638	0.182744	0.0113433
ENSRNOG00000011763	Serp1	ensembl	3505.88	2925.28	0.835338	0.0113525
ENSRNOG00000013738	LOC100174910	ensembl	332.329	232.656	0.702515	0.0113638
ENSRNOG00000049975	Zfp46	ensembl	465.439	597.279	1.28447	0.0114179
ENSRNOG00000020138	Slc4a3	ensembl	1066.26	1308.98	1.22921	0.011435
ENSRNOG00000015068	Il11ra1	ensembl	533.394	672.986	1.2645	0.0114503
ENSRNOG00000053456	Lage3	ensembl	342.231	258.489	0.756229	0.011484
ENSRNOG00000013387	Tpcn2	ensembl	60.4475	93.5323	1.54583	0.0114871
ENSRNOG00000031478	Zfp663	ensembl	21.9932	10.1899	0.466388	0.0114951
ENSRNOG00000055889	AABR07030901.1	ensembl	22.2658	2.73445	0.130859	0.0115328
ENSRNOG00000012100	Ssbp1	ensembl	671.963	862.476	1.28454	0.0115628
ENSRNOG00000025028	Prkdc	ensembl	1799.61	1444.58	0.803426	0.0115953
ENSRNOG00000019840	Mdp1	ensembl	442.018	308.432	0.69977	0.0116007
ENSRNOG00000009694	Bmp4	ensembl	414.504	541.606	1.30771	0.0116086
ENSRNOG00000020552	Fosl1	ensembl	63.2192	102.414	1.60982	0.0116173
ENSRNOG00000002986	Efhc2	ensembl	120.477	79.0443	0.659208	0.0116386
ENSRNOG00000006587	Setd3	ensembl	3515.79	4244.84	1.20901	0.0116585
ENSRNOG00000049151	Csap1	ensembl	47.6992	1.88707	0.042432	0.0116818
ENSRNOG00000040120	Bhmt2	ensembl	11.1539	0.337108	0.0402949	0.0117009
ENSRNOG00000036423	Mir92b	ensembl	5.02623	0.647294	0.146038	0.0117227
ENSRNOG00000001516	Rapgef4	ensembl	1956.43	1605.89	0.82202	0.0117474
ENSRNOG00000019110	Ocstamp	ensembl	0.312253	5.61842	12.476	0.0117827
ENSRNOG00000029316	Gtf2f2	ensembl	367.361	474.113	1.2936	0.0117871
ENSRNOG00000004555	Sec14l3	ensembl	7244.97	12261.1	1.69399	0.0117901
ENSRNOG00000055673	AABR07021558.1	ensembl	120.218	80.2378	0.668972	0.0118814
ENSRNOG00000005550	Lrfn5	ensembl	1000	814.298	0.815057	0.0118908
ENSRNOG00000025005	Ccdc190	ensembl	184.442	80.0861	0.436306	0.0119041
ENSRNOG00000057206	U6	ensembl	2.00045	7.6829	3.57497	0.0119276
ENSRNOG00000035543	Mir331	ensembl	25.8972	56.5434	2.16028	0.0119376
ENSRNOG00000018294	Hspa5	ensembl	30382.8	36138.4	1.19095	0.0119522
ENSRNOG00000038437	AABR07060746.1	ensembl	188.952	260.908	1.38391	0.0119886
ENSRNOG00000022941	LOC102549852	ensembl	4.03925	0.296242	0.104474	0.012068
ENSRNOG00000003476	Slc6a4	ensembl	0.662857	6.95764	8.70412	0.0121041
ENSRNOG00000011661	Hnrnph2	ensembl	4618.55	5482.32	1.18866	0.0121162
ENSRNOG00000001596	Atp5g3	ensembl	3344.46	2788.7	0.83493	0.0121295
ENSRNOG00000003025	Rn50_X_0749.3	havana	4154.15	5039.09	1.21431	0.0121588
ENSRNOG00000049361	Gas7	ensembl	732.515	574.166	0.785027	0.0121644
ENSRNOG00000012791	Ajuba	ensembl	75.8448	45.9428	0.608886	0.012183
ENSRNOG00000055586	LOC100910650	ensembl	0.624505	8.30656	10.5849	0.0121891
ENSRNOG00000014871	Zic4	ensembl	238.993	164.529	0.691785	0.0122633
ENSRNOG00000010450	Elovl7	ensembl	281.378	182.65	0.651474	0.0122756
ENSRNOG00000023577	Gigyf2	ensembl_havana	7666.71	9182.26	1.19911	0.0122918
ENSRNOG00000003689	Nono	ensembl_havana	5196.25	6186.04	1.19237	0.0122986
ENSRNOG00000048982	Calcoco1	ensembl	444.269	331.738	0.746872	0.0123601
ENSRNOG00000007299	Caap1	ensembl	635.394	800.079	1.25979	0.0123757
ENSRNOG00000023566	Vwa3b	ensembl_havana	60.4042	27.4818	0.460966	0.0123858
ENSRNOG00000020503	Cbln3	ensembl	2.70166	13.8837	4.92386	0.0123948
ENSRNOG00000011155	AABR07072207.1	ensembl	1655.57	2054.15	1.24172	0.0124032
ENSRNOG00000027139	Krt20	ensembl_havana	0	2.88493	24.1979	0.0124298
ENSRNOG00000003054	Cask	ensembl	353.85	230.511	0.651012	0.012441
ENSRNOG00000010859	Zyg11b	ensembl	1417.49	1162.91	0.821676	0.012441
ENSRNOG00000021960	AC109958.1	ensembl	5026.47	6000.91	1.19543	0.0124475
ENSRNOG00000014578	Fxyd4	ensembl	12.0758	25.0974	2.07502	0.0124591
ENSRNOG00000022502	Nsrp1	ensembl_havana	1044.76	1347.84	1.29087	0.0124794
ENSRNOG00000001080	Arl6ip4	ensembl	1352.99	1663.56	1.23194	0.0125629
ENSRNOG00000033733	Ccdc81	ensembl	40.686	18.2985	0.458419	0.0125937
ENSRNOG00000016826	Pla2g2d	ensembl	26.6642	13.5851	0.512761	0.012644
ENSRNOG00000053684	U6	ensembl	0	3.50386	29.2271	0.0126756
ENSRNOG00000060984	Dnah7	ensembl	156.149	57.5679	0.370794	0.0126771
ENSRNOG00000024101	Phkb	ensembl	1824.91	1482.32	0.813516	0.0127036
ENSRNOG00000019163	Syt6	ensembl	185.976	126.579	0.680832	0.0127157
ENSRNOG00000058474	AABR07015941.1	ensembl	536.745	674.706	1.25918	0.0127318
ENSRNOG00000049270	Ppp2r3b	ensembl	100.727	158.189	1.58003	0.0127765
ENSRNOG00000042944	Cenpw	ensembl	4.80256	0.63335	0.15409	0.0127984
ENSRNOG00000015153	Ints3	ensembl	1234.14	993.776	0.806317	0.0127998
ENSRNOG00000009203	RGD1561795	ensembl	18.6892	5.08171	0.281877	0.0128197
ENSRNOG00000046261	Acp5	ensembl	7.26137	16.998	2.3193	0.012821
ENSRNOG00000011955	AABR07026997.1	ensembl	8181.11	9818.85	1.20184	0.0128324
ENSRNOG00000003508	Ergic1	ensembl	1223.6	1488.6	1.21779	0.0128749
ENSRNOG00000018898	Mpi	ensembl	696.104	554.827	0.798763	0.012883
ENSRNOG00000054591	AABR07030642.1	ensembl	0.624505	6.86148	8.73228	0.0129093
ENSRNOG00000053881	Baz2a	ensembl	565.248	698.153	1.23623	0.0129608
ENSRNOG00000002813	Dars2	ensembl_havana	422.98	315.985	0.748623	0.0130034
ENSRNOG00000001476	Cldn4	ensembl	2.87152	9.92151	3.45506	0.0131428
ENSRNOG00000038951	Cox17	ensembl	1289.92	1568.56	1.21692	0.0131751
ENSRNOG00000053187	AABR07007986.1	ensembl	3.09519	0	0.0385518	0.0131778
ENSRNOG00000059660	AABR07065531.5	ensembl	540.349	411.796	0.762643	0.0132079
ENSRNOG00000023366	Styxl1	ensembl	113.738	69.8665	0.61622	0.0132126
ENSRNOG00000059857	Rnd1	ensembl	250.364	181.096	0.725244	0.0132155
ENSRNOG00000051481	SCARNA18	ensembl	280.353	433.402	1.55323	0.0132342
ENSRNOG00000019257	Kif27	ensembl	247.209	175.304	0.711879	0.0132378
ENSRNOG00000014776	Adcy7	ensembl	436.308	334.581	0.767195	0.0132418
ENSRNOG00000059683	Mpp2	ensembl	398.556	307.116	0.771817	0.0132491
ENSRNOG00000011973	Il7	ensembl	5.40789	15.1879	2.74586	0.013299
ENSRNOG00000008394	Prg2	ensembl	1.70737	7.44099	4.07646	0.0133138
ENSRNOG00000053864	AABR07028917.1	ensembl	55.5947	33.8315	0.608501	0.0133515
ENSRNOG00000055962	Bgn	ensembl	1601.31	1978.91	1.23682	0.0133518
ENSRNOG00000014999	Tnpo1	ensembl	4131.01	3457.86	0.838242	0.0134169
ENSRNOG00000004510	Slc35b1	ensembl	1928.01	2340.33	1.2152	0.0134349
ENSRNOG00000011784	Mocs1	ensembl	87.2763	128.325	1.47675	0.0134353
ENSRNOG00000059503	AABR07005596.1	ensembl	13.5898	2.85753	0.222313	0.0134577
ENSRNOG00000000064	Atp5i	ensembl	1804.08	2307.87	1.28203	0.0134823
ENSRNOG00000017904	Nol7	ensembl	1559.12	1878.64	1.20689	0.0135179
ENSRNOG00000052774	AC123253.2	ensembl	18.5666	33.7234	1.81243	0.0135638
ENSRNOG00000001222	Ube2g2	ensembl	241.916	170.736	0.708115	0.0135968
ENSRNOG00000007227	Mien1	ensembl	150.957	101.064	0.66913	0.0135996
ENSRNOG00000022631	Fgf5	ensembl	0.732262	7.0328	8.76367	0.0137289
ENSRNOG00000019426	Fam103a1	ensembl	669.419	526.404	0.788638	0.0138162
ENSRNOG00000019598	Vegfa	ensembl	1701.31	2068.33	1.21758	0.0138316
ENSRNOG00000020412	Sf3b2	ensembl	5149.57	6104.88	1.18726	0.0138825
ENSRNOG00000018342	Ctif	ensembl	788.811	994.001	1.26196	0.0138964
ENSRNOG00000055376	7SK	ensembl	0	3.27589	27.1058	0.0139331
ENSRNOG00000002538	Epb4.1l5	ensembl	588.36	458.889	0.781368	0.01396
ENSRNOG00000016421	Tyr	ensembl	2.97556	9.59786	3.04034	0.0139795
ENSRNOG00000012689	Opn5	ensembl	5.6234	0.970941	0.190517	0.0140161
ENSRNOG00000014740	Gast	ensembl_havana	19.8485	6.89955	0.35507	0.0140234
ENSRNOG00000002653	Kcnk2	ensembl	1671.3	2014.48	1.2065	0.0140282
ENSRNOG00000013658	Nefl	ensembl	16571.9	19619.3	1.18549	0.0140291
ENSRNOG00000011313	Sorcs1	ensembl	931.293	747.4	0.803198	0.0140645
ENSRNOG00000016923	Clptm1l	ensembl	1134.26	854.009	0.754479	0.0140712
ENSRNOG00000050877	LOC100912538	ensembl	695.405	558.956	0.804439	0.014145
ENSRNOG00000005256	Zc3h15	ensembl	2243.85	2678.12	1.19561	0.014201
ENSRNOG00000014209	Utp6	ensembl	1261.23	1007.7	0.799966	0.0142036
ENSRNOG00000056753	Hectd2	ensembl	756.968	607.804	0.804153	0.0142052
ENSRNOG00000013526	Rassf4	ensembl	238.114	163.065	0.686752	0.0142096
ENSRNOG00000001226	Rn50_20_0141.1	ensembl_havana	4.05112	0.337108	0.105377	0.0142478
ENSRNOG00000006611	Nostrin	ensembl	177.677	115.077	0.647108	0.0142661
ENSRNOG00000002035	Paqr3	ensembl	265.544	187.507	0.709049	0.0142669
ENSRNOG00000016029	Rb1	ensembl	505.088	391.685	0.777394	0.0142751
ENSRNOG00000014629	Lmo1	ensembl	65.7359	40.6122	0.619082	0.0143007
ENSRNOG00000017628	Tagln	ensembl	4381.35	5239.38	1.19739	0.0143707
ENSRNOG00000020771	Sap18	ensembl	1669.98	2036.96	1.22161	0.0143811
ENSRNOG00000049394	LOC100912599	ensembl_havana	85.5632	127.336	1.48808	0.014413
ENSRNOG00000015448	Fam69c	ensembl	91.6757	57.8772	0.630088	0.0145392
ENSRNOG00000001205	Agpat3	ensembl	4575.86	5482.91	1.20004	0.0145396
ENSRNOG00000002001	Itsn1	ensembl	3576.85	4224	1.18255	0.0145441
ENSRNOG00000051720	Nudc	ensembl	2432.19	2893.43	1.19141	0.0146174
ENSRNOG00000031315	Rpl36a-ps2	ensembl	2144.35	2558.64	1.19442	0.0146654
ENSRNOG00000056372	AABR07060560.3	ensembl	3.2184	0	0.0360862	0.0146959
ENSRNOG00000053810	AABR07063741.1	ensembl	3.2184	0	0.0360864	0.0147032
ENSRNOG00000056082	AC133739.1	ensembl	1.06369	5.41834	4.77468	0.0147057
ENSRNOG00000020480	Fads1	ensembl	3090.88	2602.06	0.843092	0.0147093
ENSRNOG00000006857	Ndnf	ensembl	2127.39	2570.62	1.20933	0.0147307
ENSRNOG00000060438	AABR07001634.1	ensembl	18.4734	7.74789	0.428747	0.0147432
ENSRNOG00000005290	Ywhae	ensembl	15356.2	18314.9	1.19436	0.0147505
ENSRNOG00000054140	Myl6	ensembl	7391.99	8883.03	1.20343	0.014757
ENSRNOG00000012301	Cfap161	ensembl	83.6594	22.7608	0.275505	0.0147608
ENSRNOG00000048656	AABR07007853.1	ensembl	137.321	85.2894	0.619352	0.0148097
ENSRNOG00000027940	Lppr3	ensembl	338.159	441.386	1.30889	0.0148123
ENSRNOG00000017852	Nars	ensembl	7754.93	9150.21	1.18146	0.014832
ENSRNOG00000004426	Rps27a	ensembl	2452.03	3023.76	1.23513	0.0148838
ENSRNOG00000010905	Dlx5	ensembl	34.0178	18.1291	0.532982	0.0149573
ENSRNOG00000003139	Smc1a	ensembl	7076.69	8368.23	1.18392	0.0149726
ENSRNOG00000045580	AC125982.2	ensembl	1.60333	7.33233	4.8336	0.014984
ENSRNOG00000004282	Arl4a	ensembl	1302.8	1067.56	0.82115	0.0150361
ENSRNOG00000011932	Snrpa1	ensembl	554.294	693.407	1.25284	0.015041
ENSRNOG00000049596	Cfap58	ensembl_havana	5.48831	0.674217	0.140223	0.0150442
ENSRNOG00000046420	AABR07006458.1	ensembl	786.79	641.814	0.816294	0.01505
ENSRNOG00000048589	Ncbp2	ensembl	214.287	294.727	1.37898	0.0150582
ENSRNOG00000059921	AABR07013746.1	ensembl	6.27524	1.01133	0.168049	0.0150762
ENSRNOG00000011200	Bhmt	ensembl	34.1328	6.01082	0.180917	0.0150822
ENSRNOG00000058099	U6	ensembl	6.67236	0.63335	0.109563	0.0150867
ENSRNOG00000061299	LOC100134871	ensembl	1470.82	1133.9	0.772708	0.0151375
ENSRNOG00000009639	Zrsr1	ensembl	3297.1	4004.27	1.21571	0.0151416
ENSRNOG00000057222	AABR07002868.2	ensembl	6.83764	18.8933	2.66162	0.0151491
ENSRNOG00000013262	Myl1	ensembl	31.158	61.0305	1.9354	0.0151525
ENSRNOG00000003066	Wnt9a	ensembl	8.00551	2.21024	0.291057	0.0151704
ENSRNOG00000038355	Crygs	ensembl	12.4605	1.21237	0.110326	0.0151815
ENSRNOG00000042414	Nat14	ensembl	289.057	382.453	1.32311	0.0151975
ENSRNOG00000004057	Ccdc88a	ensembl	6330.5	7531.2	1.19117	0.0152055
ENSRNOG00000001928	Il1rap	ensembl	438.878	333.219	0.760034	0.0152306
ENSRNOG00000001191	Tchp	ensembl	718.73	881.959	1.22962	0.0152541
ENSRNOG00000032137	Foxb2	ensembl	40.4592	71.9157	1.76556	0.0153032
ENSRNOG00000013255	Dnajc8	ensembl	2908.6	3579.15	1.23204	0.0153479
ENSRNOG00000056231	U6	ensembl	4.57889	0.592484	0.16289	0.0153537
ENSRNOG00000019418	Lrrc4b	ensembl	2382.78	2830.97	1.18948	0.0153693
ENSRNOG00000001238	Rsrc2	ensembl	4639.31	5568.87	1.20189	0.015385
ENSRNOG00000030938	RGD1564074	ensembl	45.8227	8.53172	0.190158	0.0154014
ENSRNOG00000043113	Fam43b	ensembl	13.6052	29.36	2.15434	0.015467
ENSRNOG00000018510	Cdk7	ensembl	549.466	420.778	0.766745	0.0154779
ENSRNOG00000060709	AABR07046866.1	ensembl	39.8875	17.577	0.439241	0.0155208
ENSRNOG00000016243	Casq2	ensembl	208.381	289.669	1.39405	0.0155848
ENSRNOG00000000557	Ppa1	ensembl	7916.66	9334.65	1.18065	0.0155864
ENSRNOG00000027658	Gpr101	ensembl	1448.87	1839.59	1.27058	0.0156243
ENSRNOG00000001309	Camkk2	ensembl	113.088	70.0133	0.621454	0.0156438
ENSRNOG00000011162	Smco4	ensembl	35.4597	19.3819	0.553494	0.0156639
ENSRNOG00000058386	Golt1b	ensembl	2783.42	3311.06	1.19115	0.0156899
ENSRNOG00000005751	Il36rn	ensembl	3.23758	0	0.0359866	0.0157304
ENSRNOG00000027175	Cnpy4	ensembl	808.486	1015	1.25759	0.0157368
ENSRNOG00000058057	Uggt2	ensembl	1522.63	1230.91	0.810138	0.0157698
ENSRNOG00000002592	Rps6ka6	ensembl	533.707	391.182	0.732444	0.0157784
ENSRNOG00000011904	Trappc4	ensembl	324.841	243.507	0.750319	0.0157835
ENSRNOG00000001277	Mafk	ensembl	328.067	422.19	1.28876	0.0157975
ENSRNOG00000007900	Tspan33	ensembl	546.325	409.798	0.752821	0.0157977
ENSRNOG00000016629	Zcchc6	ensembl	1509.55	1811.05	1.20128	0.015863
ENSRNOG00000011884	Golga2	ensembl	2411.21	2888.25	1.19967	0.0158806
ENSRNOG00000016519	Kdm1b	ensembl	478.094	364.207	0.763792	0.0159152
ENSRNOG00000024563	Ganc	ensembl	493.922	390.342	0.792365	0.0160227
ENSRNOG00000020014	Myh14	ensembl	1048.18	1394.65	1.33446	0.0160342
ENSRNOG00000042602	AABR07009224.1	ensembl	26.93	13.586	0.510018	0.0160407
ENSRNOG00000010357	Lhx9	ensembl	43.4643	23.8836	0.555778	0.0160407
ENSRNOG00000005083	Rtfdc1	ensembl	860.652	1057.71	1.23102	0.0160803
ENSRNOG00000061441	AABR07071935.1	ensembl	12.4692	26.9148	2.10089	0.0160872
ENSRNOG00000059431	AABR07053814.1	ensembl	0.331428	3.82847	8.46231	0.0161188
ENSRNOG00000051102	Rn50_1_1361.1	havana	1940.14	2323.6	1.19874	0.0161542
ENSRNOG00000017560	Mdk	ensembl	785.906	483.79	0.61742	0.0161623
ENSRNOG00000020644	Nsg2	ensembl	17191.7	20482.7	1.19311	0.0162518
ENSRNOG00000017577	Bphl	ensembl	232.325	169.389	0.72993	0.0163204
ENSRNOG00000051221	Rn50_8_0647.2	havana	10.099	2.60215	0.258757	0.0163614
ENSRNOG00000016496	Ctsc	ensembl	610.598	481.677	0.79088	0.0163619
ENSRNOG00000004542	Ttc8	ensembl	261.182	191.795	0.734968	0.0163667
ENSRNOG00000042696	Minos1	ensembl	475.467	363.067	0.764481	0.0164363
ENSRNOG00000051553	AABR07001594.1	ensembl	37.2173	60.4919	1.63921	0.0164414
ENSRNOG00000017810	Uros	ensembl	77.8056	42.6784	0.554671	0.0164539
ENSRNOG00000012227	Stambp	ensembl	358.601	266.357	0.74378	0.0164813
ENSRNOG00000020451	Cd81	ensembl	4958.25	4160.89	0.840414	0.016509
ENSRNOG00000006226	Cacng2	ensembl	189.957	270.003	1.41938	0.01651
ENSRNOG00000020351	Vps4a	ensembl	2456.57	2940.09	1.19897	0.0165165
ENSRNOG00000002820	LOC24906	ensembl	9.62058	2.78878	0.299571	0.0165424
ENSRNOG00000058283	SNORA62	ensembl	253.173	151.57	0.597769	0.0166195
ENSRNOG00000019582	Mthfd1l	ensembl	499.196	368.152	0.739475	0.016662
ENSRNOG00000008564	Tmem222	ensembl	130.397	85.9505	0.662972	0.0166824
ENSRNOG00000017071	Babam1	ensembl	559.337	685.836	1.2272	0.0166835
ENSRNOG00000002322	RGD1310587	ensembl	789.313	981.771	1.24735	0.0166989
ENSRNOG00000050106	Rcc1	ensembl	70.793	44.572	0.629538	0.0167697
ENSRNOG00000007152	Bhlhe40	ensembl	791.332	999.796	1.26613	0.0167801
ENSRNOG00000025274	Hexb	ensembl	1469.01	1204.13	0.82061	0.0167896
ENSRNOG00000024186	Eef1b2	ensembl	5518.52	6705.9	1.21672	0.0168107
ENSRNOG00000037310	Riiad1	ensembl	23.7502	7.09138	0.305095	0.0168245
ENSRNOG00000008414	Bsg	ensembl	15548.4	19083.6	1.22912	0.0168288
ENSRNOG00000007235	Atp5g1	ensembl	310.647	232.255	0.750131	0.0168413
ENSRNOG00000009370	Tbkbp1	ensembl	317.085	423.84	1.33871	0.0169026
ENSRNOG00000018528	Nrl	ensembl	1.77678	8.80977	4.84646	0.0169038
ENSRNOG00000001593	Lnp	ensembl	1228.84	963.51	0.785614	0.0169521
ENSRNOG00000047781	Slc25a23	ensembl	427.572	324.846	0.762173	0.0169928
ENSRNOG00000018309	Chd4	ensembl	7003.61	8406.3	1.20233	0.0170315
ENSRNOG00000019321	Cck	ensembl	99.6961	66.1906	0.664749	0.0170494
ENSRNOG00000037688	RGD1560386	ensembl	199.077	75.5117	0.381045	0.0170565
ENSRNOG00000007792	Gcc1	ensembl	512.831	631.033	1.23138	0.0170966
ENSRNOG00000011964	Abcd4	ensembl	54.7054	31.2549	0.574833	0.0171462
ENSRNOG00000005350	Pwp1	ensembl	510.242	703.473	1.38088	0.0171569
ENSRNOG00000017061	Patl2	ensembl	0	2.54734	21.5392	0.0171886
ENSRNOG00000053145	Vwa8	ensembl	290.901	210.982	0.72544	0.0172416
ENSRNOG00000008671	Dct	ensembl_havana	28.5437	7.3881	0.264384	0.0172583
ENSRNOG00000033844	LOC100912195	ensembl	2313.25	2778.92	1.20302	0.0172641
ENSRNOG00000060431	Pfpl	ensembl	0.662857	4.51615	5.6949	0.0172661
ENSRNOG00000003897	Col1a1	ensembl	1326.73	1078.83	0.813741	0.0172707
ENSRNOG00000008298	Dock7	ensembl	3175.36	2643.79	0.833897	0.0173069
ENSRNOG00000033973	Ccdc177	ensembl	40.8364	64.0924	1.56641	0.0173137
ENSRNOG00000046195	Slc22a4	ensembl	80.5524	51.8774	0.643641	0.0173174
ENSRNOG00000045552	AC123316.2	ensembl	2.71353	0	0.0433421	0.0173329
ENSRNOG00000009336	Mapk15	ensembl	28.3911	11.6345	0.414765	0.0174305
ENSRNOG00000059120	AABR07011031.1	ensembl	3.68864	0.323647	0.114392	0.0174381
ENSRNOG00000025383	Pdha1	ensembl	4604.4	5434.28	1.18198	0.017526
ENSRNOG00000013061	Tusc3	ensembl	3894.92	3245.41	0.834099	0.0175369
ENSRNOG00000024221	Mettl24	ensembl	1.53393	7.15492	4.79536	0.0175762
ENSRNOG00000000033	Tmcc2	ensembl	2119.89	2531.2	1.19618	0.0176018
ENSRNOG00000038786	Rn50_13_0839.3	ensembl_havana	5.06459	12.4131	2.38431	0.017643
ENSRNOG00000019127	Zfp606	ensembl	585.333	459.235	0.785994	0.017647
ENSRNOG00000004117	Kcnv1	ensembl	138.542	94.4552	0.68097	0.0177047
ENSRNOG00000016488	Pltp	ensembl	1157.27	918.17	0.795212	0.0177244
ENSRNOG00000006727	Dtd2	ensembl	242.947	321.353	1.3239	0.0177551
ENSRNOG00000030118	Msn	ensembl_havana	3695.77	4403.99	1.1931	0.0177601
ENSRNOG00000061355	AABR07032162.1	ensembl	2.75189	0	0.0431035	0.0177793
ENSRNOG00000003242	Gulp1	ensembl	702.45	573.807	0.817382	0.017829
ENSRNOG00000013280	Olfm4	ensembl	48.8319	27.1604	0.557209	0.0178802
ENSRNOG00000000799	Abcf1	ensembl_havana	1682.61	2075.77	1.23483	0.0179117
ENSRNOG00000038095	Ccdc169	ensembl	3.18005	0	0.036443	0.017934
ENSRNOG00000019935	Armc5	ensembl	365.427	466.299	1.27912	0.0179371
ENSRNOG00000012068	LOC685849	ensembl	18.554	6.01178	0.334145	0.0180056
ENSRNOG00000027906	Ankrd11	ensembl	2499.03	2975.13	1.19185	0.0181493
ENSRNOG00000013719	Dph5	ensembl	468.443	358.327	0.766195	0.018195
ENSRNOG00000009609	AC120727.1	ensembl	1148.64	1378.06	1.20076	0.0182701
ENSRNOG00000045790	LOC100910130	ensembl	779.352	1012.36	1.30035	0.018299
ENSRNOG00000035519	Mir324	ensembl	1.13309	5.35055	4.70815	0.0183341
ENSRNOG00000057054	AABR07028907.1	ensembl	27.8859	46.1105	1.65323	0.0183685
ENSRNOG00000019908	Lamtor2	ensembl	571.109	735.636	1.28961	0.0183717
ENSRNOG00000042977	Mtx1	ensembl	958.009	1194.1	1.24973	0.0184615
ENSRNOG00000000417	Numa1	ensembl	4223.61	5031.55	1.1933	0.0184693
ENSRNOG00000051622	U6	ensembl	12.199	4.82537	0.395932	0.0185461
ENSRNOG00000018745	Sgsm3	ensembl	1184.81	1420.87	1.20129	0.0185586
ENSRNOG00000021688	Ndufa13	ensembl	1011.4	1263.14	1.24913	0.0186259
ENSRNOG00000004333	Flywch1	ensembl	4078.76	4851.75	1.19115	0.0186341
ENSRNOG00000049378	Dennd5b	ensembl	1452.52	1202.06	0.828356	0.0186725
ENSRNOG00000008423	Gpr22	ensembl	1038.5	842.211	0.811934	0.0186727
ENSRNOG00000031769	Chchd7	ensembl	118.885	74.4793	0.627374	0.0186852
ENSRNOG00000057522	LOC103689968	ensembl	242.974	322.971	1.33348	0.0186904
ENSRNOG00000038050	RGD1564319	ensembl	0.312253	3.45001	7.74418	0.0186904
ENSRNOG00000042478	Adam22	ensembl	1662.88	1322.34	0.796262	0.0187876
ENSRNOG00000035631	Mir221	ensembl	40.305	22.1893	0.550478	0.018797
ENSRNOG00000006859	Insig1	ensembl	2535.09	2989.66	1.18124	0.0188002
ENSRNOG00000017349	Tbc1d10b	ensembl	955.021	1160.68	1.2181	0.0188187
ENSRNOG00000016800	Ss18	ensembl	894.662	732.374	0.819703	0.0188233
ENSRNOG00000052458	SNORA36	ensembl	2.64413	0	0.0437512	0.0188312
ENSRNOG00000059110	AABR07068341.1	ensembl	520.405	670.384	1.2924	0.0188481
ENSRNOG00000002754	Areg	ensembl	4.98702	0.323647	0.0876404	0.018862
ENSRNOG00000017065	Arhgap28	ensembl	179.709	119.195	0.665496	0.0188784
ENSRNOG00000061215	Crym	ensembl	99.1285	57.8111	0.588326	0.0188786
ENSRNOG00000011203	Farp1	ensembl	443.423	341.346	0.770403	0.0189045
ENSRNOG00000037765	Lims1	ensembl	543.727	426.745	0.786485	0.0189535
ENSRNOG00000057240	SNORD49	ensembl	15.3024	5.54094	0.358538	0.0189878
ENSRNOG00000031033	Mt-nd2	insdc	31454.8	44314	1.4099	0.0190121
ENSRNOG00000009197	Asb4	ensembl	388.179	284.498	0.732365	0.0190423
ENSRNOG00000016716	Armc3	ensembl	47.9234	13.6404	0.289277	0.0190573
ENSRNOG00000050420	Krt5	ensembl_havana	0	2.58821	21.675	0.019079
ENSRNOG00000054872	snoR38	ensembl	4.68665	0.63335	0.161889	0.0190959
ENSRNOG00000057497	AABR07042936.2	ensembl	322.63	438.912	1.3609	0.0191445
ENSRNOG00000036615	RGD1560242	ensembl	11.7053	2.19629	0.201221	0.0191916
ENSRNOG00000017241	Dpcd	ensembl	1854.16	2222.57	1.20102	0.0192438
ENSRNOG00000048545	LOC100910483	ensembl	654.9	812.62	1.24102	0.0192534
ENSRNOG00000010783	Mak16	ensembl	638.113	520.093	0.815867	0.0192551
ENSRNOG00000016403	Olah	ensembl	4.88742	0.674217	0.14946	0.0192561
ENSRNOG00000027767	Slc38a5	ensembl	30.846	15.3366	0.504618	0.0192963
ENSRNOG00000010434	Dync1li1	ensembl	1675.74	2001.15	1.19562	0.0193259
ENSRNOG00000011929	Abcd3	ensembl	3745.59	3148.15	0.841847	0.0193824
ENSRNOG00000004018	Tdrd5	ensembl	42.1356	24.1895	0.578175	0.0193932
ENSRNOG00000008353	Iqch	ensembl	30.8735	12.6198	0.4114	0.0194645
ENSRNOG00000000708	Sgsm1	ensembl	2089.81	2471.44	1.18393	0.019493
ENSRNOG00000050748	Dpp9	ensembl	213.917	150.455	0.703609	0.0194997
ENSRNOG00000058589	AABR07046778.1	ensembl	1815.42	2480.96	1.36839	0.019524
ENSRNOG00000005159	Fam135b	ensembl	488.024	381.285	0.782017	0.0195296
ENSRNOG00000025416	Dpy19l4	ensembl	1237.2	1008.9	0.816674	0.0195844
ENSRNOG00000054275	Nsun3	ensembl	13.4317	27.0745	2.04138	0.0196148
ENSRNOG00000008490	Cwc15	ensembl	1427.84	1748.56	1.22647	0.0196632
ENSRNOG00000020076	Borcs7	ensembl	1145.49	1379.93	1.20666	0.0196899
ENSRNOG00000011628	Krt27	ensembl_havana	1.61879	7.07647	3.93142	0.0197399
ENSRNOG00000025254	Qrich2	ensembl	2.8907	9.06891	3.18876	0.0197806
ENSRNOG00000058531	SNORD115	ensembl	262.632	190.16	0.725575	0.0197822
ENSRNOG00000020941	Psenen	ensembl	782.097	1069.02	1.37069	0.0197849
ENSRNOG00000045585	Dpy19l2	ensembl	9.1386	2.88445	0.327183	0.0198459
ENSRNOG00000003305	Cxcr3	ensembl_havana	5.30743	0.984402	0.195727	0.0198865
ENSRNOG00000020637	Hmx3	ensembl	3.72699	0.296242	0.113318	0.0199552
ENSRNOG00000013703	Siah2	ensembl	92.8474	62.3929	0.673076	0.0200659
ENSRNOG00000056802	AABR07028749.2	ensembl	3.98544	0.323647	0.110547	0.0200828
ENSRNOG00000015932	Plgrkt	ensembl	270.909	178.354	0.660949	0.0201963
ENSRNOG00000005367	Slc12a1	ensembl	69.0308	103.24	1.49296	0.020197
ENSRNOG00000020246	Myl9	ensembl	2786.67	3502.45	1.25815	0.0202001
ENSRNOG00000020530	Cnfn	ensembl	2.78294	0	0.0429629	0.0202014
ENSRNOG00000039086	Ccdc153	ensembl	70.3692	16.6065	0.238784	0.0202022
ENSRNOG00000053902	Metazoa_SRP	ensembl	41.3103	23.1917	0.568508	0.0202115
ENSRNOG00000025406	Iqgap2	ensembl	417.693	283.886	0.682368	0.0202584
ENSRNOG00000027360	Srsf7	ensembl	1979.43	2380.99	1.20519	0.0202609
ENSRNOG00000023700	RGD1311847	ensembl	370.374	276.344	0.747566	0.0202931
ENSRNOG00000039447	Pate4	ensembl	8.703	2.52042	0.297739	0.0203166
ENSRNOG00000058108	7SK	ensembl	495.162	283.416	0.574493	0.0203181
ENSRNOG00000012886	Maff	ensembl	32.5761	54.0189	1.65471	0.0203193
ENSRNOG00000020465	Ripk3	ensembl	72.23	106.854	1.47503	0.0203252
ENSRNOG00000001036	Rsph10b	ensembl_havana	224.099	128.497	0.576716	0.0203263
ENSRNOG00000018759	Slc45a2	ensembl	11.0157	23.6575	2.10078	0.0203558
ENSRNOG00000016227	Glrx3	ensembl	2114.95	1755.93	0.831243	0.0203657
ENSRNOG00000057044	Garnl3	ensembl	351.258	272.215	0.776215	0.020405
ENSRNOG00000033498	Cib1	ensembl	104.586	63.1328	0.608379	0.020421
ENSRNOG00000059440	Rn50_9_0975.2	havana	101.462	151.061	1.48219	0.0204293
ENSRNOG00000058507	Dtx2-ps1	ensembl	10.4141	3.31724	0.319286	0.0204488
ENSRNOG00000016812	Adamts16	ensembl	25.3266	13.4383	0.530245	0.0204723
ENSRNOG00000051960	Dnajc12	ensembl	623.461	474.077	0.761594	0.0205617
ENSRNOG00000009812	Sbf2	ensembl	2281.78	1903.09	0.835142	0.0205855
ENSRNOG00000024120	Rxfp1	ensembl	338.046	430.102	1.27596	0.0206122
ENSRNOG00000022839	Ifit3	ensembl_havana	235.082	309.307	1.32044	0.0208064
ENSRNOG00000020640	Zbtb7b	ensembl	175.256	236.29	1.35268	0.0208457
ENSRNOG00000020261	Fam53c	ensembl	333.904	433.449	1.30268	0.0209333
ENSRNOG00000037540	Tmem256	ensembl_havana	541.771	688.495	1.27525	0.0209922
ENSRNOG00000056243	ST7	ensembl	394.314	305.635	0.77507	0.0209989
ENSRNOG00000018576	Rcan3	ensembl	196.647	266.927	1.35508	0.0210487
ENSRNOG00000019990	RGD1566239	ensembl	240.023	330.944	1.37986	0.0210527
ENSRNOG00000002768	Tmem114	ensembl	43.7773	66.8951	1.52894	0.0210641
ENSRNOG00000035500	Mirlet7c-1	ensembl	26.6952	11.5081	0.434742	0.0211395
ENSRNOG00000020299	Klc2	ensembl	2826.18	3325.12	1.17823	0.0211553
ENSRNOG00000049187	AABR07069837.1	ensembl	3.22212	9.43391	2.9618	0.0211695
ENSRNOG00000012779	Msr1	ensembl	86.9006	54.6432	0.628636	0.0211785
ENSRNOG00000016526	Dsg2	ensembl	37.8484	17.7242	0.476173	0.0212014
ENSRNOG00000005470	Atxn3	ensembl	446.166	556.782	1.25077	0.021217
ENSRNOG00000027089	Ell2	ensembl	591.467	718.649	1.21652	0.0212827
ENSRNOG00000046492	Tmem194	ensembl	21.8226	9.41027	0.436251	0.0213005
ENSRNOG00000018414	Csf1r	ensembl	1566.49	1297.38	0.829748	0.0214057
ENSRNOG00000056275	AABR07052298.1	ensembl	4.49031	0.674217	0.166151	0.0214492
ENSRNOG00000011254	Fam76a	ensembl	290.553	206.895	0.714404	0.0214966
ENSRNOG00000032539	Spag8	ensembl	85.1142	37.9241	0.449846	0.0215213
ENSRNOG00000021042	Psmd4	ensembl	4011.88	4734.78	1.18147	0.0215533
ENSRNOG00000060487	AC125873.2	ensembl	2.73271	8.15327	2.90594	0.0215717
ENSRNOG00000013149	Vps33b	ensembl	675.927	530.656	0.785528	0.0216027
ENSRNOG00000009963	Ctps1	ensembl	1730.79	2052.16	1.18772	0.0216606
ENSRNOG00000011100	AABR07040947.1	ensembl	5.51565	13.4124	2.40283	0.0216669
ENSRNOG00000020833	Cspg5	ensembl	3267.89	3880.84	1.18929	0.0216948
ENSRNOG00000020638	Hmx2	ensembl	6.89889	1.48121	0.239093	0.0216951
ENSRNOG00000059166	Ldb3	ensembl_havana	127.679	178.77	1.40441	0.0217005
ENSRNOG00000010048	Dctn1	ensembl	5060.7	5976.88	1.18247	0.0217094
ENSRNOG00000024200	LOC690235	ensembl	3.34176	0	0.0367546	0.0217123
ENSRNOG00000059686	SNORA21	ensembl	29.2929	16.0098	0.55327	0.0217276
ENSRNOG00000005513	Srsf5	ensembl	6843.27	8023.24	1.17422	0.0217369
ENSRNOG00000054180	U6	ensembl	7.20384	16.4324	2.24472	0.0217761
ENSRNOG00000039985	Ube2a	ensembl_havana	247.436	185.996	0.753558	0.0217847
ENSRNOG00000009088	Txnrd1	ensembl	2253.41	2678.59	1.19054	0.0218226
ENSRNOG00000036571	Ces2	ensembl	15.6175	6.95387	0.453662	0.0218266
ENSRNOG00000057382	U1	ensembl	23.9198	41.6026	1.76002	0.0218472
ENSRNOG00000020620	Ppp1r32	ensembl	54.4335	15.8775	0.295784	0.0218704
ENSRNOG00000018346	Agtr1a	ensembl	66.9986	42.7821	0.640778	0.0219075
ENSRNOG00000034089	Ttc21a	ensembl	101.698	47.5773	0.471926	0.0220094
ENSRNOG00000057799	AABR07027752.3	ensembl	56.8991	31.4082	0.548779	0.0220264
ENSRNOG00000004516	Itgbl1	ensembl	1916.54	2291.21	1.19636	0.0220529
ENSRNOG00000016583	RGD1561517	ensembl	0.955933	5.12209	4.5596	0.0220682
ENSRNOG00000052528	SNORA73	ensembl	73.1678	43.8555	0.599912	0.0220865
ENSRNOG00000017035	Cep120	ensembl	1253.85	1040.03	0.830255	0.022094
ENSRNOG00000014602	Mtfmt	ensembl	335.679	258.39	0.770725	0.0220986
ENSRNOG00000049991	Mcpt8l3	ensembl	2.69436	0	0.0435401	0.0221998
ENSRNOG00000037744	Oas1i	ensembl	13.5174	27.2812	1.9957	0.0223446
ENSRNOG00000012764	Agap3	ensembl	1009.46	1235.2	1.22592	0.0223706
ENSRNOG00000004171	Dnah9	ensembl	691.188	504.023	0.731457	0.0223746
ENSRNOG00000027860	Ggnbp2	ensembl	4507.12	5307.95	1.17907	0.0224068
ENSRNOG00000019201	Apoa1bp	ensembl	368.07	265.525	0.723253	0.0226035
ENSRNOG00000014205	Klf2	ensembl	39.1947	60.5048	1.53619	0.0226071
ENSRNOG00000013817	Wnt8b	ensembl	26.6479	12.8421	0.491106	0.0226211
ENSRNOG00000048231	Tmem235	ensembl	9.28099	3.49088	0.385068	0.0226574
ENSRNOG00000016593	Pde6c	ensembl	7.01122	1.83226	0.284686	0.0226772
ENSRNOG00000014846	Anp32a	ensembl	1632.06	1957.81	1.20077	0.0227132
ENSRNOG00000028077	Cfap44	ensembl	406.579	171.001	0.422185	0.0227548
ENSRNOG00000037220	Rpl5l1	ensembl	2459.87	2933.59	1.19413	0.0227736
ENSRNOG00000051208	Selv	ensembl_havana	5.24175	14.6401	2.75776	0.0228862
ENSRNOG00000058275	Spef2	ensembl	201.798	117.938	0.587054	0.0229158
ENSRNOG00000045691	AABR07058795.1	ensembl	29.659	16.5517	0.557938	0.02298
ENSRNOG00000001174	Pde9a	ensembl	332.995	243.177	0.732627	0.0229992
ENSRNOG00000048365	LOC100911625	ensembl	3263.71	3841.46	1.1785	0.0230239
ENSRNOG00000046012	Rn50_X_0636.2	havana	26.5748	45.8105	1.72757	0.0230639
ENSRNOG00000048322	Otx2	ensembl	18.735	3.46348	0.193381	0.0230697
ENSRNOG00000021081	Vps72	ensembl	928.668	1128.96	1.21795	0.0231045
ENSRNOG00000008794	Ube2e1	ensembl	459.509	567.309	1.23482	0.0231052
ENSRNOG00000019453	Rps5	ensembl	2405.13	3130.71	1.30372	0.0231428
ENSRNOG00000061095	SCARNA20	ensembl	31.3848	14.9094	0.477041	0.0231984
ENSRNOG00000017913	Atg16l1	ensembl	907.437	1096.83	1.21062	0.0232201
ENSRNOG00000058571	AABR07024542.1	ensembl	525.954	406.817	0.774365	0.0233164
ENSRNOG00000000073	Tmed5	ensembl	612.246	492.321	0.805968	0.023328
ENSRNOG00000010985	Zfp410	ensembl	745.365	609.352	0.819	0.02341
ENSRNOG00000054902	Trpc1	ensembl	766.345	628.571	0.82235	0.0234201
ENSRNOG00000061533	Zfp945	ensembl	382.797	293.97	0.767931	0.023464
ENSRNOG00000013250	Pdcd5	ensembl	1004.26	1272.05	1.26779	0.0235109
ENSRNOG00000012748	Vamp8	ensembl	216.352	303.394	1.40683	0.0235658
ENSRNOG00000021729	Iqub	ensembl	368.919	228.732	0.622559	0.0235867
ENSRNOG00000053831	AABR07065049.2	ensembl	2.8678	0	0.0401742	0.0236272
ENSRNOG00000012840	Sparc	ensembl	44895.5	52747	1.17636	0.0236463
ENSRNOG00000059666	AABR07068212.1	ensembl	7.57362	18.144	2.37727	0.0237065
ENSRNOG00000011134	Lama2	ensembl	1981.52	1673.78	0.845893	0.0237366
ENSRNOG00000049468	AABR07043449.1	ensembl	12.6884	23.5609	1.84587	0.023846
ENSRNOG00000004424	RGD1563962	ensembl	404.731	318.189	0.787856	0.0240193
ENSRNOG00000031022	Rpl36al	ensembl	2930.68	3506.67	1.19817	0.0240366
ENSRNOG00000021986	AABR07015006.1	ensembl	1658.7	1951.74	1.1782	0.0240926
ENSRNOG00000015093	Sparcl1	ensembl	87261	102240	1.17323	0.0241422
ENSRNOG00000008223	Cnr1	ensembl	3022.06	2499.81	0.828184	0.0241988
ENSRNOG00000020444	Hcn3	ensembl	157.394	212.165	1.34989	0.0241998
ENSRNOG00000014898	Rn50_1_1141.1	havana	15.2321	6.6586	0.439733	0.0242016
ENSRNOG00000001130	Nos1	ensembl	1470.12	1753.36	1.19407	0.0242045
ENSRNOG00000036719	Samd10	ensembl	98.469	62.1269	0.632257	0.0242737
ENSRNOG00000013756	Snrnp48	ensembl	672.284	825.513	1.2317	0.0242945
ENSRNOG00000049942	RGD1564899	ensembl	9.45902	20.2701	2.11162	0.0243475
ENSRNOG00000025523	RGD1564887	ensembl	339.105	234.267	0.692981	0.0243793
ENSRNOG00000045570	LOC288978	ensembl	28.4144	60.3996	2.1029	0.0243825
ENSRNOG00000025551	Rgs22	ensembl	556.123	345.564	0.623554	0.0243907
ENSRNOG00000014658	Zfp423	ensembl	1065.7	1275.03	1.19817	0.0244404
ENSRNOG00000038328	Gjc2	ensembl	608.073	779.293	1.28415	0.0244516
ENSRNOG00000014765	Vapa	ensembl	3242.84	2752.61	0.849775	0.0244555
ENSRNOG00000048051	AABR07021054.1	ensembl	1.30654	6.03774	4.14398	0.0244579
ENSRNOG00000008411	Sec23b	ensembl	704.011	578.779	0.824061	0.0244949
ENSRNOG00000020951	Slc4a1	ensembl	11.5126	24.6251	2.17269	0.0244956
ENSRNOG00000004889	Vangl2	ensembl	235.2	305.78	1.30114	0.0245245
ENSRNOG00000009934	Emc3	ensembl	1106.56	908.289	0.822171	0.0245266
ENSRNOG00000013442	Ciz1	ensembl	674.12	819.177	1.21722	0.0245468
ENSRNOG00000026646	Ndufs5	ensembl	247.639	185.94	0.752497	0.0245822
ENSRNOG00000057759	AABR07027854.1	ensembl	2039.75	2458.56	1.2071	0.0245998
ENSRNOG00000018250	Tnni3	ensembl	12.8038	1.50861	0.131033	0.0246177
ENSRNOG00000004062	C4bpa	ensembl	0	2.76185	23.676	0.024619
ENSRNOG00000028137	Mki67	ensembl	198.967	143.752	0.724357	0.0246282
ENSRNOG00000019701	Lbhd1	ensembl	313.316	423.486	1.35418	0.024637
ENSRNOG00000011348	Snx14	ensembl	2080.29	1712.21	0.824123	0.0246816
ENSRNOG00000055371	Sptbn4	ensembl	1069.56	1279.47	1.19776	0.024682
ENSRNOG00000020047	Tut1	ensembl	611.956	750.826	1.22899	0.0247015
ENSRNOG00000028103	Psmd3	ensembl	1214.06	1446.08	1.1934	0.0247261
ENSRNOG00000036834	Gpr84	ensembl	36.7543	21.0804	0.578058	0.0247517
ENSRNOG00000020828	Pde4a	ensembl	102.036	70.0878	0.688116	0.0247569
ENSRNOG00000007748	Tex15	ensembl	403.7	307.958	0.765807	0.024763
ENSRNOG00000022431	Zfp867	ensembl	267.616	193.953	0.72516	0.0247839
ENSRNOG00000048062	AABR07065815.1	ensembl	6.0125	0	0.0205761	0.0248163
ENSRNOG00000005326	Cnrip1	ensembl_havana	697.945	832.847	1.19468	0.0248407
ENSRNOG00000019549	Akap12	ensembl	7782.96	9188.31	1.18196	0.0248444
ENSRNOG00000055496	LOC103690166	ensembl	216.556	151.394	0.699966	0.0249586
ENSRNOG00000015914	U2af2	ensembl	879.933	702.603	0.799826	0.0249693
ENSRNOG00000047002	Fstl5	ensembl_havana	1758.88	1440.68	0.820011	0.0250342
ENSRNOG00000020487	Coa3	ensembl_havana	496.678	402.479	0.811611	0.0250875
ENSRNOG00000001575	Grik1	ensembl	831.884	688.797	0.829059	0.0250876
ENSRNOG00000022176	Gpr75	ensembl	245.283	183.195	0.746852	0.0251371
ENSRNOG00000018747	Elmo2	ensembl	750.606	612.02	0.816805	0.0251935
ENSRNOG00000020773	Map3k11	ensembl	270.919	348.098	1.28863	0.0252197
ENSRNOG00000001640	Tomm70a	ensembl	463.421	359.653	0.777032	0.0252253
ENSRNOG00000053250	RGD1307660	ensembl	17.1477	8.18019	0.483726	0.0252413
ENSRNOG00000031287	Cacna2d3	ensembl	1115.52	885.569	0.795482	0.0252862
ENSRNOG00000018874	Phf19	ensembl	36.3189	59.5507	1.6547	0.0253805
ENSRNOG00000003645	Hnrnpab	ensembl	647.507	784.136	1.21327	0.0253883
ENSRNOG00000013320	RGD1561916	ensembl	71.8967	36.6876	0.51484	0.0254008
ENSRNOG00000020117	Brms1	ensembl	436.738	536.831	1.23206	0.025442
ENSRNOG00000012424	Adam23	ensembl	4266.9	5022.39	1.17862	0.0254571
ENSRNOG00000049754	AABR07052895.1	ensembl	0	2.62908	21.8737	0.0254625
ENSRNOG00000018170	Slc27a1	ensembl	578.467	462.313	0.800562	0.0254654
ENSRNOG00000004520	Wdr60	ensembl	1013.23	1248.18	1.23495	0.0254762
ENSRNOG00000008098	Lrrc4	ensembl	668.314	809.195	1.21316	0.0255211
ENSRNOG00000004564	Lrriq1	ensembl	352.576	216.201	0.61543	0.0255521
ENSRNOG00000002332	Mospd1	ensembl	103.756	63.2063	0.614364	0.0255528
ENSRNOG00000019361	Inpp5j	ensembl	130.987	182.984	1.40103	0.0255829
ENSRNOG00000008619	Agtrap	ensembl	887.66	1089.62	1.23001	0.0256006
ENSRNOG00000002240	Dirc2	ensembl	745.472	612.461	0.823026	0.0256396
ENSRNOG00000014089	Map3k2	ensembl	403.308	298.941	0.74192	0.0256503
ENSRNOG00000006619	Dnajc9	ensembl	1152.52	1363.91	1.18552	0.0256707
ENSRNOG00000011732	Psmb7	ensembl	5987.82	7054.14	1.1797	0.0257036
ENSRNOG00000049052	Sgk3	ensembl	253.841	167.256	0.661135	0.0257261
ENSRNOG00000025359	Spesp1	ensembl	3.04868	0	0.040664	0.0257507
ENSRNOG00000028512	Ilvbl	ensembl	252.665	190.611	0.754709	0.0258281
ENSRNOG00000008176	Nppa	ensembl	33.6664	17.942	0.536915	0.025851
ENSRNOG00000047287	Nucks1	ensembl	2409.02	2931.93	1.2195	0.0258909
ENSRNOG00000004710	Rbks	ensembl	132.633	91.2049	0.691728	0.0259238
ENSRNOG00000052298	Atp8a1	ensembl	186.169	119.567	0.643473	0.0259269
ENSRNOG00000007926	Map2k5	ensembl	370.658	281.983	0.763511	0.0259545
ENSRNOG00000020651	Cars	ensembl	1467.79	1861.36	1.27001	0.0259749
ENSRNOG00000060376	LOC100910237	ensembl	20.5697	36.6352	1.77354	0.0259789
ENSRNOG00000057380	AABR07057161.1	ensembl	8.63817	2.46561	0.297818	0.0260103
ENSRNOG00000016641	Actl7a	ensembl	4.94867	12.4948	2.52508	0.026015
ENSRNOG00000016660	Cox5b	ensembl_havana	6564.01	8411.86	1.28309	0.0260191
ENSRNOG00000007356	Chmp3	ensembl	2493.41	2983.78	1.19773	0.0260267
ENSRNOG00000030316	Otogl	ensembl	3.58089	0.323647	0.116408	0.0260548
ENSRNOG00000019741	Isyna1	ensembl	168.877	124.228	0.736815	0.0260556
ENSRNOG00000001573	Usp25	ensembl	1488.12	1246.64	0.838764	0.0260577
ENSRNOG00000041989	AABR07010030.1	ensembl	361.08	488.128	1.35695	0.0260647
ENSRNOG00000059486	SNORA2	ensembl	3.60006	11.3056	2.9901	0.026088
ENSRNOG00000043324	Upk2	ensembl	24.094	12.3044	0.510316	0.026107
ENSRNOG00000008829	Sorbs3	ensembl	229.146	309.749	1.35511	0.0261565
ENSRNOG00000051129	Rn50_X_0677.1	havana	465.145	605.729	1.30457	0.0262108
ENSRNOG00000019273	Capn7	ensembl	2042.38	1709.74	0.837954	0.0262723
ENSRNOG00000005818	RGD1563349	ensembl	1452.98	1196.21	0.824509	0.0263554
ENSRNOG00000059138	AC121204.2	ensembl	32.8938	17.9916	0.548493	0.0263721
ENSRNOG00000011135	Gtf2b	ensembl	1268.84	1524.26	1.20327	0.0263951
ENSRNOG00000016180	Pdp1	ensembl	1330.24	1102.95	0.830355	0.0264033
ENSRNOG00000018123	Ccny	ensembl	1578.35	1895.84	1.20275	0.0264199
ENSRNOG00000014907	Aldh8a1	ensembl	5.66176	13.2345	2.36551	0.0264265
ENSRNOG00000047434	AABR07011977.1	ensembl	83.7737	123.62	1.47867	0.0264474
ENSRNOG00000048795	Top2b	ensembl_havana	3832.32	3232.73	0.844646	0.0264878
ENSRNOG00000012409	Exosc3	ensembl	224.008	163.557	0.732526	0.0265205
ENSRNOG00000013239	Tle4	ensembl	1159.84	968.738	0.835909	0.0265625
ENSRNOG00000031523	AABR07071287.1	ensembl	18.0375	1.25324	0.0769313	0.0265638
ENSRNOG00000015192	Mrps5	ensembl	1298.87	1547.5	1.19262	0.0265707
ENSRNOG00000049380	Rn50_11_0375.8	havana	48.3178	86.3911	1.78672	0.026666
ENSRNOG00000002848	Maoa	ensembl	4150.68	4923.25	1.18814	0.0266842
ENSRNOG00000017206	Igfbp5	ensembl	4722.87	5781.05	1.22568	0.0267735
ENSRNOG00000032391	Esyt2	ensembl	1609.71	1283.57	0.798359	0.0268461
ENSRNOG00000021808	Tecr	ensembl	3190.87	3960.24	1.24334	0.0269194
ENSRNOG00000024338	LOC690276	ensembl	42.9669	19.8262	0.466352	0.0269535
ENSRNOG00000000376	Tmem167b	ensembl	98.4442	64.7947	0.660417	0.026999
ENSRNOG00000028832	Sorcs3	ensembl	638.958	524.9	0.823472	0.0270183
ENSRNOG00000057849	AABR07012023.1	ensembl	6.12828	1.34843	0.224951	0.0270259
ENSRNOG00000013279	LOC681458	ensembl	52.9935	34.1008	0.644573	0.0270916
ENSRNOG00000013506	Zfand6	ensembl	1672.64	1347.32	0.806481	0.0271076
ENSRNOG00000056376	Dusp22	ensembl	295.282	380.024	1.29012	0.0271214
ENSRNOG00000018724	RGD1564428	ensembl	22.4583	6.21467	0.281477	0.0271269
ENSRNOG00000000924	Slc7a1	ensembl	1099.97	1301.81	1.1852	0.0271718
ENSRNOG00000004731	Ano3	ensembl	1102.15	851.682	0.773691	0.0271941
ENSRNOG00000043288	Smim13	ensembl	186.88	132.526	0.708279	0.0272023
ENSRNOG00000048433	Tshz2	ensembl	826.733	988.138	1.19678	0.0272666
ENSRNOG00000045757	Obp1f	ensembl	0	3.08502	26.1336	0.0272932
ENSRNOG00000006554	Fam149b1	ensembl	812.431	678.009	0.8357	0.0272982
ENSRNOG00000011830	Plekha3	ensembl	612.037	500.494	0.818289	0.0273041
ENSRNOG00000002055	Noa1	ensembl	620.772	748.018	1.20633	0.0273329
ENSRNOG00000015582	Me2	ensembl	1484.58	1207.29	0.815112	0.0273622
ENSRNOG00000006112	LOC102554315	ensembl	342.878	262.069	0.764248	0.027386
ENSRNOG00000011927	Sdc3	ensembl	1775.79	2111.46	1.19083	0.0273935
ENSRNOG00000023528	Hrasls5	ensembl	0.936758	5.09469	4.57145	0.0274014
ENSRNOG00000047089	Alkbh7	ensembl	480.996	611.733	1.27402	0.0274085
ENSRNOG00000013137	Clec4f	ensembl	0.331428	3.2081	7.09845	0.0274099
ENSRNOG00000010396	Eya3	ensembl	875.673	719.746	0.822848	0.0274548
ENSRNOG00000045968	RGD1561310	ensembl	27.8129	14.8921	0.541357	0.0274695
ENSRNOG00000004814	Tceb2	ensembl	308.371	238.197	0.774493	0.0274895
ENSRNOG00000018901	Rab14	ensembl	1980.79	1642.33	0.830348	0.0275032
ENSRNOG00000056839	SNORA38	ensembl	0.400833	3.2081	7.02741	0.0275258
ENSRNOG00000018066	Bccip	ensembl	842.983	1045.23	1.24292	0.0275536
ENSRNOG00000061165	AABR07013073.4	ensembl	12.1298	24.0846	2.01834	0.027586
ENSRNOG00000053719	AABR07065656.5	ensembl	3.71512	0	0.0321132	0.0276061
ENSRNOG00000050561	AABR07065821.1	ensembl	3.71512	0	0.0321133	0.0276113
ENSRNOG00000010453	Klhl7	ensembl	1815.82	1509.94	0.83264	0.027621
ENSRNOG00000018327	Fank1	ensembl	39.4588	19.9233	0.508995	0.0276415
ENSRNOG00000014193	Lig1	ensembl	383.835	499.076	1.30077	0.0277583
ENSRNOG00000002906	Nr1i2	ensembl	3.46869	0	0.035684	0.0278035
ENSRNOG00000039674	Sumo2	ensembl	25.3378	50.0147	1.9854	0.0278933
ENSRNOG00000001314	Fam20c	ensembl	900.543	1096.6	1.22015	0.0279013
ENSRNOG00000006341	Saysd1	ensembl	65.103	94.7774	1.45687	0.0279172
ENSRNOG00000047309	LOC100360120	ensembl	508.644	408.275	0.802751	0.0279245
ENSRNOG00000011241	Tfdp2	ensembl	666.47	531.658	0.799696	0.027943
ENSRNOG00000004740	Mmadhc	ensembl	1082.93	1284.52	1.18808	0.0280098
ENSRNOG00000005285	Fbxo33	ensembl	1148.08	944.695	0.823308	0.0280365
ENSRNOG00000037518	Hyi	ensembl	6.57562	16.8229	2.46015	0.0280535
ENSRNOG00000005904	Cdc27	ensembl	2025.92	1688.66	0.834495	0.0280642
ENSRNOG00000014431	AABR07000222.1	ensembl	251.558	330.244	1.31828	0.0281194
ENSRNOG00000015101	Mak	ensembl	50.2167	22.0471	0.445536	0.0281259
ENSRNOG00000001875	Smpd4	ensembl	258.212	194.333	0.754274	0.0281865
ENSRNOG00000056038	Ehbp1l1	ensembl	326.477	411.668	1.26297	0.0281968
ENSRNOG00000009712	Gale	ensembl	122.045	177.274	1.44794	0.0282202
ENSRNOG00000057818	U6	ensembl	0.312253	4.28722	9.43795	0.0282308
ENSRNOG00000013089	Kif13b	ensembl	2609.22	3081.65	1.18311	0.0283108
ENSRNOG00000041506	AABR07049385.1	ensembl	3.09519	9.77479	3.05402	0.0283413
ENSRNOG00000015534	Cnep1r1	ensembl	697.105	568.077	0.816255	0.0284578
ENSRNOG00000005592	Brinp2	ensembl_havana	865.114	1030.75	1.19365	0.0284675
ENSRNOG00000059749	SNORD113	ensembl	14.2497	5.86081	0.421924	0.0284703
ENSRNOG00000012324	Soga3	ensembl	2073.42	2453.56	1.18452	0.0285059
ENSRNOG00000014987	Mdfi	ensembl	18.3385	7.97914	0.445708	0.0285593
ENSRNOG00000003806	Gpr65	ensembl	21.1094	9.88064	0.472234	0.0285601
ENSRNOG00000017166	Mycbp	ensembl	416.187	320.049	0.771739	0.0285648
ENSRNOG00000032226	Vom1r43	ensembl	2.40128	0	0.0490308	0.0287427
ENSRNOG00000037452	AABR07042542.1	ensembl	0.331428	3.18069	7.07483	0.0288546
ENSRNOG00000020060	Atf5	ensembl	381.691	482.721	1.2669	0.0289043
ENSRNOG00000017987	Ucma	ensembl	10.3294	1.80486	0.192528	0.0289634
ENSRNOG00000037415	AABR07002938.1	ensembl	387.417	479.111	1.23776	0.0289965
ENSRNOG00000013751	Prosc	ensembl	1937.75	1623.55	0.838984	0.0290052
ENSRNOG00000060523	Rps2-ps2	havana	3.42662	0.323647	0.124531	0.0290749
ENSRNOG00000028992	Acan	ensembl	144.761	196.124	1.35549	0.0290814
ENSRNOG00000004807	Arf2	ensembl	883.401	1058.02	1.19992	0.0291062
ENSRNOG00000025354	Rinl	ensembl	8.65277	18.0873	2.03644	0.0291525
ENSRNOG00000003599	Utp3	ensembl	924.742	1122.82	1.21507	0.0292007
ENSRNOG00000026239	Arid4a	ensembl	3200.12	3746.91	1.17205	0.0292508
ENSRNOG00000003071	Vamp4	ensembl_havana	1941.78	2314.65	1.19301	0.0292596
ENSRNOG00000060687	Slc24a3	ensembl	795.23	976.854	1.22992	0.0293038
ENSRNOG00000006766	Laptm4b	ensembl	700.48	582.2	0.832619	0.0293045
ENSRNOG00000010615	AABR07007690.1	ensembl	2.60578	0	0.0443281	0.0293534
ENSRNOG00000007575	Lppr1	ensembl	119.492	83.7759	0.704705	0.0293642
ENSRNOG00000007726	Mcam	ensembl	1764.92	2093.58	1.18792	0.0294006
ENSRNOG00000040105	AABR07019903.1	ensembl	8.76425	2.60215	0.304952	0.0294131
ENSRNOG00000035649	Mir92a1	ensembl	0	2.21024	18.9199	0.0294262
ENSRNOG00000014819	Hap1	ensembl	10263.1	11906.8	1.16164	0.0295134
ENSRNOG00000000774	Gabbr1	ensembl_havana	19009.8	22072.7	1.16264	0.0295213
ENSRNOG00000005621	Gxylt2	ensembl	33.3366	19.3679	0.578813	0.0295395
ENSRNOG00000033361	Slc39a5	ensembl	32.8664	55.2174	1.6673	0.0296268
ENSRNOG00000015440	Wrn	ensembl	732.854	871.509	1.19019	0.0296296
ENSRNOG00000007607	Nr4a1	ensembl_havana	59.77	88.1621	1.4749	0.0296513
ENSRNOG00000002612	Ddx52	ensembl_havana	613.938	500.646	0.816702	0.0296776
ENSRNOG00000014013	Map4k4	ensembl	5826.96	6797.95	1.16847	0.0296844
ENSRNOG00000059106	SNORD113	ensembl	222.806	301.357	1.34991	0.0296915
ENSRNOG00000016937	Mtfr1l	ensembl	2128.35	2500.27	1.17672	0.0296955
ENSRNOG00000006126	Nup88	ensembl	973.948	810.249	0.832945	0.0297558
ENSRNOG00000013195	Ruvbl1	ensembl	817.608	674.566	0.825674	0.0297706
ENSRNOG00000027547	AABR07048308.1	ensembl	14.9665	6.72687	0.455277	0.0297743
ENSRNOG00000052573	SNORD17	ensembl	74.3112	46.5087	0.630095	0.0297772
ENSRNOG00000015071	Zim1	ensembl	457.631	571.571	1.24937	0.0297961
ENSRNOG00000020478	Camk4	ensembl	276.456	355.158	1.28625	0.0298264
ENSRNOG00000005190	Nipal2	ensembl	273.338	198.509	0.727518	0.0298314
ENSRNOG00000029597	LOC100912866	ensembl	6.92994	14.8109	2.13843	0.0298382
ENSRNOG00000030069	Faim	ensembl	330.977	458.042	1.38554	0.0298784
ENSRNOG00000005491	Best3	ensembl	6.80673	1.52208	0.249584	0.0298877
ENSRNOG00000017491	Carf	ensembl	513.992	415.105	0.808911	0.0299589
ENSRNOG00000008064	Naga	ensembl	422.52	332.542	0.788948	0.0300955
ENSRNOG00000011740	Kdelc1	ensembl	411.802	324.021	0.786851	0.0301303
ENSRNOG00000004642	Lmx1a	ensembl	37.8635	7.06021	0.191714	0.0301402
ENSRNOG00000005512	Ndufa4	ensembl	1192.96	997.474	0.837093	0.0301696
ENSRNOG00000012892	Abca4	ensembl	112.412	47.1835	0.423435	0.0301846
ENSRNOG00000011944	Snx10	ensembl	2759.63	3216.24	1.16678	0.0303292
ENSRNOG00000054905	AC139608.2	ensembl	13.9685	26.2689	1.86932	0.0303502
ENSRNOG00000003594	Tmem183a	ensembl	2496.95	2915.42	1.16921	0.0303507
ENSRNOG00000022173	Gatad2a	ensembl	766.924	916.739	1.19749	0.0303607
ENSRNOG00000023841	Cd99l2	ensembl	2661.79	3103.38	1.16715	0.0303962
ENSRNOG00000036267	Mir341	ensembl	24.4719	11.7932	0.478759	0.0304155
ENSRNOG00000051133	Rn50_X_0707.2	havana	2.98743	0	0.0394132	0.0304887
ENSRNOG00000018097	Emc1	ensembl	2398.83	2799.03	1.16839	0.0305127
ENSRNOG00000007320	Fam3d	ensembl	7.29986	0.997864	0.151289	0.0305133
ENSRNOG00000003029	Calr	ensembl	23072.1	27087.8	1.17555	0.0305608
ENSRNOG00000050922	Nupr1l1	ensembl	705.323	850.58	1.20713	0.0305955
ENSRNOG00000033496	Igdcc4	ensembl	405.385	499.536	1.23343	0.0305975
ENSRNOG00000005451	Dnah11	ensembl	396.885	271.49	0.687051	0.0306809
ENSRNOG00000006979	Hpca	ensembl	164.468	113.851	0.695519	0.0306981
ENSRNOG00000004754	Tc2n	ensembl	289.533	220.785	0.764723	0.0307154
ENSRNOG00000018225	Tp53inp2	ensembl	1158.31	1399.63	1.21034	0.0307354
ENSRNOG00000009205	Lmo4	ensembl	669.008	553.574	0.828241	0.0307616
ENSRNOG00000056338	Fam186a	ensembl	4.96871	13.9259	2.69532	0.030803
ENSRNOG00000020347	Nup98	ensembl	1278.78	1077.17	0.843229	0.0308534
ENSRNOG00000011475	Srcin1	ensembl	288.258	384.243	1.33792	0.0309398
ENSRNOG00000053757	SNORA51	ensembl	5.95483	1.48121	0.279412	0.0309416
ENSRNOG00000023269	AABR07021759.1	ensembl	1515.19	1796.69	1.18768	0.0309565
ENSRNOG00000009965	Pih1d2	ensembl	161.66	102.464	0.635937	0.0309574
ENSRNOG00000042197	AABR07065792.1	ensembl	3.12166	0	0.0382742	0.0309612
ENSRNOG00000061829	7SK	ensembl	117.16	193.767	1.66489	0.0309634
ENSRNOG00000057932	U6	ensembl	2.57472	0	0.0445663	0.0310037
ENSRNOG00000032034	Supt5h	ensembl	3727.73	4338.86	1.16538	0.0310512
ENSRNOG00000031251	LOC103693372	ensembl	5.61969	1.32151	0.239942	0.0310682
ENSRNOG00000039593	Ecscr	ensembl	3.80828	10.2442	2.64409	0.0310762
ENSRNOG00000030910	Grik4	ensembl	261.516	192.675	0.738398	0.0311373
ENSRNOG00000022227	AABR07002564.1	ensembl	294.06	378.614	1.28666	0.031152
ENSRNOG00000010119	Zmat3	ensembl	139.223	94.3673	0.677484	0.0311599
ENSRNOG00000015226	Man1a2	ensembl	1967.02	2299.62	1.17059	0.0312254
ENSRNOG00000026577	Cpne4	ensembl	282.733	211.655	0.750588	0.0312403
ENSRNOG00000021584	AABR07028349.1	ensembl	4926.67	5742.75	1.16696	0.0312493
ENSRNOG00000020748	Map4	ensembl	7690.17	8958.34	1.16658	0.0313173
ENSRNOG00000056996	Ccdc108	ensembl	23.3952	6.29408	0.27752	0.0313206
ENSRNOG00000003129	Zfp496	ensembl	207.427	151.304	0.731421	0.0313386
ENSRNOG00000024142	Arglu1	ensembl_havana	1661.22	2008.93	1.21164	0.0313633
ENSRNOG00000012458	Cyp2e1	ensembl	9.91366	3.80058	0.384843	0.0313719
ENSRNOG00000032913	Rasl2-9	ensembl	44.429	25.9606	0.580496	0.0313945
ENSRNOG00000024497	U2af1l4	ensembl	852.197	1031.47	1.21288	0.0314172
ENSRNOG00000010103	Eif4b	ensembl_havana	9138.68	10555.1	1.15662	0.0314672
ENSRNOG00000008425	Nav1	ensembl	366.832	467.074	1.27467	0.0314809
ENSRNOG00000017644	Usp6nl	ensembl	724.11	580.905	0.803381	0.0314834
ENSRNOG00000013579	LOC100359916	ensembl	7194.35	8437.49	1.1747	0.0314899
ENSRNOG00000017047	Inip	ensembl	57.1293	86.0669	1.49974	0.0314975
ENSRNOG00000053929	RNaseP_nuc	ensembl	6198.83	3874.6	0.625966	0.0315565
ENSRNOG00000061684	Ndufa9	ensembl	2477.25	2903.12	1.17388	0.0315861
ENSRNOG00000005387	Rbm3	ensembl	1751.61	2102.49	1.20258	0.0316843
ENSRNOG00000013876	Mipep	ensembl	671.697	526.73	0.785775	0.0317125
ENSRNOG00000022802	Tmem184b	ensembl	424.256	528.58	1.24795	0.0317625
ENSRNOG00000002529	Rap2c	ensembl	1373.44	1159.91	0.845315	0.0317633
ENSRNOG00000015189	Bbs9	ensembl	357.497	282.631	0.791618	0.0318097
ENSRNOG00000020433	Actn4	ensembl	2355.51	2752.7	1.17022	0.0318803
ENSRNOG00000005964	Nr4a3	ensembl	30.0516	47.6989	1.58911	0.031904
ENSRNOG00000029995	Herpud2	ensembl	429.137	329.301	0.767329	0.0319329
ENSRNOG00000003207	Fmnl1	ensembl	165.312	121.705	0.738198	0.0319523
ENSRNOG00000011178	Lrp2bp	ensembl	32.5223	19.0572	0.589699	0.03204
ENSRNOG00000055961	SNORA21	ensembl	3.71154	0.337108	0.119975	0.0320479
ENSRNOG00000023403	Gtpbp3	ensembl	94.834	138.045	1.45413	0.0321604
ENSRNOG00000042283	Rslcan18	ensembl	416.965	330.512	0.793504	0.0321643
ENSRNOG00000003520	Prdx2	ensembl	6893.78	8158.12	1.18512	0.0322714
ENSRNOG00000013717	Bmp6	ensembl	589.512	470.86	0.7989	0.032275
ENSRNOG00000029394	Dusp8	ensembl	179.817	243.217	1.35528	0.0322966
ENSRNOG00000010737	Mbnl2	ensembl	4480.32	3802.56	0.849634	0.0323645
ENSRNOG00000059663	Rufy2	ensembl	587.246	475.01	0.811158	0.0324999
ENSRNOG00000006471	Pvalb	ensembl	302.293	392.362	1.30085	0.0326177
ENSRNOG00000060991	Rn60_1_0436.2	havana	70.5308	46.9569	0.664731	0.0326214
ENSRNOG00000009006	Ccdc47	ensembl	9325.15	10803.5	1.16015	0.0326274
ENSRNOG00000014399	Aamp	ensembl_havana	2090.39	2478.9	1.18796	0.0326403
ENSRNOG00000027263	RGD1562550	ensembl	128.445	86.9587	0.674985	0.032642
ENSRNOG00000056363	Ccdc110	ensembl	20.7971	10.2033	0.494762	0.0327148
ENSRNOG00000049882	Adcyap1	ensembl	308.123	229.416	0.744385	0.0327794
ENSRNOG00000057085	AABR07050288.1	ensembl	9.55861	19.7584	2.08655	0.0328058
ENSRNOG00000022411	RGD1561958	ensembl	2.40128	7.76183	3.15091	0.0328331
ENSRNOG00000061691	AABR07030939.1	ensembl	102.914	72.6784	0.7064	0.0328344
ENSRNOG00000017915	Dvl2	ensembl	274.641	360.814	1.31924	0.0328772
ENSRNOG00000057816	SNORA5	ensembl	387.09	297.506	0.771231	0.0328796
ENSRNOG00000048663	AABR07002093.1	ensembl	2.47069	0	0.0485463	0.0328802
ENSRNOG00000009433	Ccdc109b	ensembl	35.0815	19.8248	0.567898	0.0329436
ENSRNOG00000051682	Zcchc9	ensembl	766.41	920.499	1.20265	0.0329825
ENSRNOG00000001057	Ctxn1	ensembl	300.437	381.535	1.27115	0.0330497
ENSRNOG00000016973	Tmem242	ensembl	622.826	751.953	1.20757	0.0330621
ENSRNOG00000004172	Pdk2	ensembl	364.496	286.924	0.787895	0.0330876
ENSRNOG00000030871	Calm2	ensembl	20257.8	23459.4	1.1595	0.0330954
ENSRNOG00000022852	Snx22	ensembl	27.9681	14.4646	0.516587	0.0331533
ENSRNOG00000054301	AABR07049799.1	ensembl	5.92464	0.888725	0.172782	0.033183
ENSRNOG00000009790	Kcnk3	ensembl	116.941	161.549	1.37896	0.0332082
ENSRNOG00000060360	U6	ensembl	16.7358	30.5384	1.80154	0.033222
ENSRNOG00000058444	LOC102548682	ensembl	537.763	914.741	1.70191	0.0332233
ENSRNOG00000056206	U6	ensembl	0.994285	5.33612	4.77539	0.0332362
ENSRNOG00000000108	Aga	ensembl	1331.55	1118.96	0.841024	0.0332451
ENSRNOG00000002935	Ankrd40	ensembl	2718.01	3191.5	1.17606	0.0333019
ENSRNOG00000045933	LOC102556148	ensembl	43.2193	26.4718	0.611131	0.033347
ENSRNOG00000035472	Mir204	ensembl	8.65291	1.94188	0.236904	0.0333673
ENSRNOG00000005929	Them6	ensembl_havana	209.597	269.722	1.28882	0.0334178
ENSRNOG00000057822	Rn50_20_0058.5	havana	14.2918	25.8082	1.82182	0.0334584
ENSRNOG00000021795	Fam227a	ensembl	113.338	66.9974	0.594399	0.0334893
ENSRNOG00000024568	Ndufs7	ensembl	780.991	631.208	0.8086	0.0335136
ENSRNOG00000015088	Prune2	ensembl	810.911	659.331	0.814448	0.0335245
ENSRNOG00000021087	Lgi4	ensembl	1639.93	1963	1.19903	0.0335514
ENSRNOG00000007410	Dab1	ensembl	754.611	613.048	0.812887	0.0335836
ENSRNOG00000058966	SNORA70	ensembl	9.97948	2.85753	0.296106	0.0336968
ENSRNOG00000038319	Akr1c19	ensembl	308.387	228.075	0.741923	0.0337687
ENSRNOG00000019326	Cfdp1	ensembl	3697.6	4284.45	1.16004	0.0338001
ENSRNOG00000031789	Rangap1	ensembl	3759.26	4429.57	1.17982	0.0338389
ENSRNOG00000015994	Cd3d	ensembl	6.28254	1.63121	0.263894	0.0338393
ENSRNOG00000015297	RGD1561662	ensembl	22.5172	37.7297	1.66447	0.0338683
ENSRNOG00000017299	Phrf1	ensembl	832.61	1001.96	1.20387	0.0338954
ENSRNOG00000059558	AABR07062344.2	ensembl	17.1168	31.266	1.85675	0.0339146
ENSRNOG00000053366	AABR07002784.1	ensembl	520.057	421.883	0.812406	0.0339472
ENSRNOG00000054842	AABR07010587.1	ensembl	0	2.5334	21.4592	0.0339949
ENSRNOG00000025539	Vps13a	ensembl	3921.97	3324.36	0.848565	0.0340015
ENSRNOG00000058861	AABR07039697.1	ensembl	29.0609	16.2555	0.559674	0.0340255
ENSRNOG00000019463	Mad2l1bp	ensembl	115.792	156.528	1.35183	0.0340526
ENSRNOG00000003792	Med14	ensembl	851.543	713.006	0.83847	0.0340714
ENSRNOG00000016262	Dnase2b	ensembl	3.84663	10.3668	2.65261	0.0340906
ENSRNOG00000023023	Trpt1	ensembl	84.3398	58.0235	0.690165	0.0341672
ENSRNOG00000015511	Atic	ensembl	1113.97	936.837	0.841813	0.0341712
ENSRNOG00000019165	Mrpl51	ensembl	2173.79	2551.11	1.17476	0.0341881
ENSRNOG00000050680	AABR07008916.1	ensembl	5.2034	12.8588	2.441	0.0342136
ENSRNOG00000010027	Atr	ensembl	1179.23	964.078	0.819573	0.0342234
ENSRNOG00000006589	LOC103694877	ensembl	183.896	129.621	0.703633	0.0342632
ENSRNOG00000017311	Me3	ensembl	311.428	234.869	0.756697	0.0342745
ENSRNOG00000012821	Lect1	ensembl	25.6038	6.96734	0.27904	0.0343576
ENSRNOG00000004662	RGD1560687	ensembl	25.199	13.3297	0.538965	0.0343641
ENSRNOG00000009063	Dnajc15	ensembl	780.039	549.861	0.706534	0.0343694
ENSRNOG00000059823	7SK	ensembl	3.1646	9.30113	2.90497	0.0343761
ENSRNOG00000059401	Ccdc40	ensembl	97.746	35.824	0.369642	0.0344142
ENSRNOG00000059393	U6	ensembl	0.312253	3.97751	8.75247	0.0344535
ENSRNOG00000021410	Negr1	ensembl	1469.33	1199.25	0.817785	0.0344687
ENSRNOG00000021159	LOC100362987	ensembl	361.544	284.834	0.788536	0.0345013
ENSRNOG00000022701	Ceacam18	ensembl	5.58863	13.6254	2.3439	0.0345235
ENSRNOG00000046741	Itsn2	ensembl	2804.91	3321.02	1.18499	0.0345283
ENSRNOG00000000728	Clic2	ensembl	93.6052	64.6338	0.689777	0.034574
ENSRNOG00000038909	Pou3f3	ensembl	526.203	649.028	1.2367	0.0346282
ENSRNOG00000024178	Cenpt	ensembl	11.1309	4.02855	0.381384	0.0346672
ENSRNOG00000042499	LOC100364435	ensembl	2317.2	2811.6	1.21454	0.0347504
ENSRNOG00000017295	Sh3glb2	ensembl	902.804	748.67	0.831077	0.0348166
ENSRNOG00000053378	U6	ensembl	9.49737	3.29032	0.345918	0.034817
ENSRNOG00000014296	Syt10	ensembl	176.35	129.251	0.736339	0.0348422
ENSRNOG00000048990	LOC685025	ensembl	469.19	576.654	1.23059	0.0349192
ENSRNOG00000025898	LOC690142	ensembl	5.79685	13.5298	2.3039	0.0349329
ENSRNOG00000008450	LOC100359539	ensembl	48.1671	31.0298	0.644225	0.0350343
ENSRNOG00000031211	Acsm5	ensembl	271.278	205.346	0.760082	0.0350347
ENSRNOG00000006972	Zfp189	ensembl	522.295	416.934	0.79896	0.0350567
ENSRNOG00000026573	Ophn1	ensembl_havana	960.785	799.619	0.833514	0.0350864
ENSRNOG00000019697	Ankrd28	ensembl	1779.04	1509.58	0.8498	0.0350885
ENSRNOG00000000021	AABR07061902.1	ensembl	138.977	191.341	1.37703	0.0351866
ENSRNOG00000028052	RGD1563620	ensembl	170.447	124.775	0.732415	0.0351918
ENSRNOG00000038202	Calml4	ensembl	97.4847	38.5676	0.399291	0.0352195
ENSRNOG00000057527	RNase_MRP	ensembl	10319	7288.57	0.707234	0.0352249
ENSRNOG00000053048	AABR07012728.1	ensembl	0	2.49253	21.2652	0.0353327
ENSRNOG00000039559	Fam219a	ensembl	685.112	812.685	1.18831	0.0353602
ENSRNOG00000005856	Slc30a6	ensembl	217.643	155.458	0.716309	0.0355015
ENSRNOG00000003901	Cfap36	ensembl	6147.91	7200.45	1.17284	0.0355057
ENSRNOG00000060671	SNORA51	ensembl	0.312253	3.97799	8.76525	0.035552
ENSRNOG00000050335	Olr1309	ensembl	0	2.62956	21.9646	0.0355559
ENSRNOG00000025728	Adam32	ensembl	8.26381	2.58869	0.314451	0.0355765
ENSRNOG00000004481	Adss	ensembl	4258.59	4972.74	1.16923	0.0355799
ENSRNOG00000061622	SCARNA16	ensembl	4.28209	0.674217	0.170521	0.0355838
ENSRNOG00000010574	Ptpn1	ensembl	226.198	310.946	1.37795	0.0356103
ENSRNOG00000049662	LOC100909688	ensembl	208.593	158.251	0.75853	0.035635
ENSRNOG00000046029	AABR07055792.1	ensembl	36.4666	20.2484	0.554092	0.0356371
ENSRNOG00000009823	Naa38	ensembl	451.837	577.598	1.27975	0.0356736
ENSRNOG00000017285	Tab1	ensembl_havana	711.989	848.446	1.19366	0.0357083
ENSRNOG00000051865	Metazoa_SRP	ensembl	1325.13	1991.64	1.50562	0.0357704
ENSRNOG00000004304	Syap1	ensembl	1606.88	1913.66	1.19221	0.0358147
ENSRNOG00000061681	U6atac	ensembl	0.662857	3.85539	4.89232	0.0358267
ENSRNOG00000003469	MAST1	ensembl	271.524	347.777	1.28252	0.0358707
ENSRNOG00000000164	Lamp2	ensembl	3305.68	2842.23	0.860978	0.0359256
ENSRNOG00000008163	Atp6v1g1	ensembl	3255.02	3770.36	1.16015	0.0359813
ENSRNOG00000013641	Myo7a	ensembl	48.2056	28.2613	0.593171	0.0359814
ENSRNOG00000006075	Fez1	ensembl	8041.09	9309.14	1.15934	0.0359866
ENSRNOG00000057709	snoU6-53	ensembl	6.64874	1.96832	0.305127	0.0360103
ENSRNOG00000032735	Srek1	ensembl	2303.5	2762.96	1.20091	0.0360375
ENSRNOG00000001528	Gap43	ensembl	5857.83	6776.21	1.15832	0.0360908
ENSRNOG00000022331	Ccdc78	ensembl	12.0412	4.73018	0.406337	0.036119
ENSRNOG00000003330	Acsf2	ensembl	1030.18	1243.92	1.20886	0.0361326
ENSRNOG00000012860	Tmem184c	ensembl	1592.95	1345.17	0.845216	0.0362131
ENSRNOG00000021714	Fam92b	ensembl	21.6417	11.7398	0.550224	0.036308
ENSRNOG00000051719	AABR07065498.1	ensembl	34.8854	18.7528	0.540393	0.0363171
ENSRNOG00000018792	Tekt4	ensembl	50.5335	22.5125	0.450316	0.0363948
ENSRNOG00000001427	Orai2	ensembl	721.949	852.079	1.18225	0.0363997
ENSRNOG00000004500	Myc	ensembl	55.6978	83.367	1.49699	0.0364329
ENSRNOG00000013793	C1qtnf9	ensembl	59.6259	89.656	1.50761	0.0364399
ENSRNOG00000009096	Pon3	ensembl	37.4286	15.0162	0.407656	0.0364861
ENSRNOG00000012062	Npc2	ensembl	1851.33	2196.3	1.18823	0.0365412
ENSRNOG00000047911	LOC100911456	ensembl	30.7603	54.3615	1.78328	0.0365489
ENSRNOG00000017178	Hydin	ensembl_havana	355.684	182.089	0.514022	0.0365884
ENSRNOG00000026579	RGD1563323	ensembl	34.6122	19.7492	0.567757	0.0366071
ENSRNOG00000008643	Rars2	ensembl	318.106	248.98	0.784567	0.0366622
ENSRNOG00000047630	Xlr3a	ensembl	3.91603	0.619889	0.191626	0.0366872
ENSRNOG00000017803	Apbb1ip	ensembl	46.7053	27.6475	0.590971	0.0367139
ENSRNOG00000018631	Enkur	ensembl	486.165	295.683	0.610281	0.0367142
ENSRNOG00000049335	Sult6b1	ensembl	116.581	83.556	0.716675	0.0367252
ENSRNOG00000025981	Ska2	ensembl	151.197	199.141	1.3194	0.0367588
ENSRNOG00000023480	Nabp2	ensembl	941.319	1168.68	1.24406	0.0368414
ENSRNOG00000028581	Ccdc138	ensembl	199.667	147.876	0.742848	0.036906
ENSRNOG00000051889	Usp34	ensembl	6008.22	5033.01	0.838724	0.0369415
ENSRNOG00000011599	Gldc	ensembl	142.899	100.746	0.709334	0.0369712
ENSRNOG00000019247	Plekhj1	ensembl	192.168	247.78	1.29165	0.0370203
ENSRNOG00000018927	Sprn	ensembl	32.137	18.9496	0.592386	0.0370755
ENSRNOG00000032231	Mroh6	ensembl	8.78428	3.50482	0.403641	0.0370774
ENSRNOG00000054047	U2	ensembl	1626.39	1915.14	1.17875	0.0372028
ENSRNOG00000030246	Btla	ensembl	10.9619	20.7669	1.8896	0.0372417
ENSRNOG00000019926	Ramp1	ensembl	411.516	509.548	1.2403	0.0372483
ENSRNOG00000002838	Pdzd11	ensembl_havana	586.953	477.959	0.815611	0.0373167
ENSRNOG00000007283	Erlec1	ensembl	7069.52	8159.77	1.1558	0.0373361
ENSRNOG00000053075	B4galnt4	ensembl	436.405	348.388	0.798125	0.0373753
ENSRNOG00000011006	Stoml3	ensembl_havana	30.3207	8.18348	0.273919	0.0374233
ENSRNOG00000015614	Ppp1r16b	ensembl	700.511	836.845	1.1972	0.0375048
ENSRNOG00000024641	Nyap1	ensembl	270.749	351.497	1.303	0.0375459
ENSRNOG00000043048	Zfp951	ensembl	27.254	13.2801	0.484132	0.0375821
ENSRNOG00000008908	Slc35a1	ensembl	1083.36	908.236	0.839996	0.0376307
ENSRNOG00000049289	LOC100911068	ensembl	27.6076	49.2588	1.79545	0.0376943
ENSRNOG00000047453	Casd1	ensembl	1427.97	1214.6	0.851568	0.0376987
ENSRNOG00000017130	Rhd	ensembl	23.4836	8.27683	0.361072	0.0377977
ENSRNOG00000057088	SNORD113	ensembl	98.7901	67.6896	0.68446	0.03791
ENSRNOG00000017817	Cox4i1	ensembl	6371.11	7340.31	1.15362	0.0379723
ENSRNOG00000032395	Tfcp2	ensembl	811.422	962.022	1.18701	0.0381
ENSRNOG00000004149	Mgat4c	ensembl	448.829	359.211	0.800131	0.038133
ENSRNOG00000021138	Cers2	ensembl	776.459	641.641	0.827913	0.0381415
ENSRNOG00000057441	SNORA36	ensembl	4.40903	0.619889	0.165954	0.0381674
ENSRNOG00000012123	Fdx1	ensembl	115.892	73.807	0.638267	0.0382541
ENSRNOG00000048769	Nek5	ensembl	117.509	55.7236	0.477117	0.0382572
ENSRNOG00000001963	Mx2	ensembl	3107.59	3668.41	1.1822	0.0383047
ENSRNOG00000008752	Nrf1	ensembl	419.905	512.951	1.22498	0.0383324
ENSRNOG00000001736	Bdh1	ensembl	429.305	519.248	1.21107	0.0383815
ENSRNOG00000049740	LOC102553099	ensembl	99.9409	138.983	1.39539	0.0383982
ENSRNOG00000007515	Kif3a	ensembl	3811.91	4443.56	1.16701	0.0384177
ENSRNOG00000008668	Vsig8	ensembl	8.22918	2.61513	0.321896	0.0384472
ENSRNOG00000054456	7SK	ensembl	83.3473	147.541	1.78516	0.0384956
ENSRNOG00000009779	Krt8	ensembl_havana	180.614	100.885	0.561336	0.038515
ENSRNOG00000057086	LOC102549803	ensembl	54.2143	35.446	0.65905	0.0385432
ENSRNOG00000011332	Clspn	ensembl	11.9443	23.4945	1.94235	0.0385493
ENSRNOG00000001410	Gigyf1	ensembl	502.307	616.674	1.22845	0.038668
ENSRNOG00000014358	Zic5	ensembl	120.591	164.634	1.36929	0.0386952
ENSRNOG00000035480	Mir21	ensembl	19.4029	9.18182	0.468563	0.038704
ENSRNOG00000024259	Tmem54	ensembl	4.05842	0.660755	0.180909	0.038723
ENSRNOG00000021602	Zmynd10	ensembl	146.873	71.1641	0.487674	0.0387819
ENSRNOG00000013411	Nup155	ensembl	1451.55	1215.81	0.839112	0.0387889
ENSRNOG00000020289	Akt1s1	ensembl	332.543	434.568	1.3086	0.0387962
ENSRNOG00000061086	U6	ensembl	3.35721	8.73181	2.52591	0.0388168
ENSRNOG00000046023	Exoc4	ensembl	1843.4	1570.48	0.852764	0.0388344
ENSRNOG00000016703	Gtf2a1l	ensembl	6.98389	1.59083	0.247485	0.0388765
ENSRNOG00000020650	Slc17a7	ensembl_havana	324.594	221.695	0.685234	0.0389674
ENSRNOG00000060617	Kdm6a	ensembl	1126.09	938.305	0.834476	0.039005
ENSRNOG00000026519	AABR07044711.1	ensembl	3169.9	3738.47	1.18093	0.0390723
ENSRNOG00000061012	Kat5	ensembl	1237.99	1042.56	0.843407	0.0390734
ENSRNOG00000042603	Ttc39b	ensembl	858.842	693.772	0.809014	0.0390851
ENSRNOG00000006961	Snrpb	ensembl	725.922	565.595	0.780908	0.0391106
ENSRNOG00000028100	Pex11g	ensembl	24.1699	39.7992	1.66287	0.0391212
ENSRNOG00000001068	Rac1	ensembl_havana	2043.54	1740.46	0.852646	0.0391601
ENSRNOG00000006459	AABR07041140.1	ensembl	2579.97	3075.69	1.19297	0.0392128
ENSRNOG00000007392	Atp6v1f	ensembl	1443.47	1693.09	1.17459	0.0392419
ENSRNOG00000045561	Uqcc3	ensembl	508.575	634.309	1.2502	0.0392553
ENSRNOG00000020532	Kcnq1	ensembl_havana	27.3427	15.9179	0.586034	0.0393171
ENSRNOG00000050143	AABR07065815.2	ensembl	4.81	0	0.0256761	0.0393612
ENSRNOG00000012146	Pomt2	ensembl	571.681	468.612	0.820877	0.0393674
ENSRNOG00000048017	AABR07056026.1	ensembl	4.81	0	0.025676	0.0393768
ENSRNOG00000002991	Srr	ensembl_havana	167.89	112.494	0.673293	0.0393897
ENSRNOG00000010558	Ppif	ensembl	161.18	119.657	0.744766	0.0394754
ENSRNOG00000015540	Ppp6r3	ensembl	2256.36	1911.58	0.848112	0.0395334
ENSRNOG00000001515	Zak	ensembl	767.122	910.817	1.18951	0.0396028
ENSRNOG00000011160	Sv2b	ensembl_havana	2330.1	1964.85	0.844126	0.0396316
ENSRNOG00000012209	Cdadc1	ensembl	987.344	831.419	0.843365	0.0396372
ENSRNOG00000020849	Hcst	ensembl	2.05797	6.92743	3.23839	0.0396836
ENSRNOG00000021074	Olr337	ensembl	4.08948	9.55603	2.28078	0.0396926
ENSRNOG00000057568	SNORA84	ensembl	45.4539	23.6904	0.529276	0.0397214
ENSRNOG00000051532	SNORA68	ensembl	87.9815	46.321	0.531611	0.0397377
ENSRNOG00000012868	Uaca	ensembl	2119.92	2479.93	1.17129	0.0397416
ENSRNOG00000014248	Erbb4	ensembl	1690.16	1435.11	0.849999	0.0397486
ENSRNOG00000022081	Ddi1	ensembl_havana	8.88846	2.2511	0.265062	0.0397625
ENSRNOG00000057476	AABR07054045.1	ensembl	962.181	1136.94	1.18253	0.0397666
ENSRNOG00000033445	Ccdc171	ensembl_havana	1383.81	1662.55	1.20334	0.0398128
ENSRNOG00000057213	SNORA42	ensembl	1.9621	6.95387	3.28754	0.0398225
ENSRNOG00000004668	Slc25a35	ensembl	67.5664	99.6982	1.47413	0.0398299
ENSRNOG00000024628	Wdr49	ensembl	36.461	10.943	0.306549	0.0398308
ENSRNOG00000004512	Apool	ensembl	304.404	240.409	0.790693	0.0398615
ENSRNOG00000056755	7SK	ensembl	12148.9	19103.2	1.57522	0.0398975
ENSRNOG00000048295	Dmrtc1a	ensembl_havana	33.2901	19.2616	0.575572	0.0398983
ENSRNOG00000011659	Alpk3	ensembl	68.1207	96.9034	1.42405	0.0399677
ENSRNOG00000002883	Alg1	ensembl	260.477	191.492	0.73516	0.0399821
ENSRNOG00000008871	Sdr16c5	ensembl	6.23245	1.32151	0.227828	0.0400104
ENSRNOG00000011238	Tiparp	ensembl	427.951	344.561	0.80606	0.0400341
ENSRNOG00000014010	Gfra2	ensembl	432.977	533.715	1.23208	0.0400428
ENSRNOG00000006060	Matn2	ensembl	357.902	273.061	0.764008	0.0400468
ENSRNOG00000001061	Rilpl2	ensembl	498.249	405.591	0.815838	0.0400711
ENSRNOG00000030679	AABR07004397.1	ensembl	118.907	84.8969	0.714298	0.0400766
ENSRNOG00000009661	Tgds	ensembl	499.213	401.158	0.803302	0.0401219
ENSRNOG00000000105	Cplx2	ensembl	4677.76	5534.3	1.1849	0.0401316
ENSRNOG00000050081	AABR07038269.1	ensembl	63.4139	105.941	1.66727	0.040186
ENSRNOG00000055446	Amfr	ensembl	2206.61	1853.67	0.841665	0.04021
ENSRNOG00000009281	Commd1	ensembl	1917.12	2227.27	1.16323	0.0403175
ENSRNOG00000009000	Foxj2	ensembl	372.445	465.962	1.25292	0.0403738
ENSRNOG00000026821	Arhgap42	ensembl	375.97	295.516	0.787705	0.0404032
ENSRNOG00000049676	St6galnac5	ensembl	187.34	139.714	0.745433	0.0404075
ENSRNOG00000038045	Rpl34-ps1	ensembl	4599.29	3973.5	0.864954	0.0404105
ENSRNOG00000039588	Mcidas	ensembl_havana	2.79024	0	0.0427288	0.0404227
ENSRNOG00000010698	Car1	ensembl	2.79024	0	0.0427287	0.0404393
ENSRNOG00000050148	AABR07002973.1	ensembl	6.19768	1.92746	0.322388	0.0404969
ENSRNOG00000027359	Slc25a2	ensembl	78.5839	51.8557	0.658402	0.0405067
ENSRNOG00000039279	Nhlrc4	ensembl	1.6882	5.8242	3.21256	0.0405119
ENSRNOG00000010642	Lysmd2	ensembl	504.929	415.713	0.824788	0.0405425
ENSRNOG00000060307	Ten1	ensembl	77.1597	51.4248	0.665728	0.0405629
ENSRNOG00000017539	Mmp9	ensembl	10.7684	21.9576	2.07136	0.0405817
ENSRNOG00000054513	Zmiz2	ensembl	85.8747	124.259	1.44858	0.0405892
ENSRNOG00000002342	Aldh3a2	ensembl	1643.04	1403.87	0.855552	0.0406042
ENSRNOG00000007330	Capzb	ensembl	2092	2510.13	1.20084	0.0406501
ENSRNOG00000055344	Trnau1ap	ensembl	553.576	420.091	0.760888	0.0406501
ENSRNOG00000024525	Alkbh8	ensembl	865.233	718.714	0.831029	0.040665
ENSRNOG00000009508	LOC103689977	ensembl	38.0426	23.5739	0.622534	0.040726
ENSRNOG00000061038	Myh15	ensembl	53.2618	81.4161	1.52754	0.0407759
ENSRNOG00000010852	Nup205	ensembl	949.64	802.606	0.846012	0.0407865
ENSRNOG00000010392	Nrg1	ensembl	487.16	589.046	1.2093	0.0408078
ENSRNOG00000028513	RGD1560523	ensembl	853.852	1033.72	1.21415	0.0408092
ENSRNOG00000057292	AABR07043287.1	ensembl	67.9627	102.992	1.51475	0.0408189
ENSRNOG00000057542	Zfp488	ensembl	57.356	82.5609	1.44014	0.0409054
ENSRNOG00000056420	SNORD45	ensembl	3.98544	12.6248	3.21056	0.040951
ENSRNOG00000001139	Suds3	ensembl	1990.61	2332.4	1.17383	0.0410135
ENSRNOG00000057287	SNORA17	ensembl	4.69481	0.943536	0.22066	0.0410409
ENSRNOG00000019249	Ap3b2	ensembl	2003.55	2318.03	1.15881	0.0410553
ENSRNOG00000015249	Taf8	ensembl	380.251	462.75	1.21954	0.0410636
ENSRNOG00000018358	Nt5dc2	ensembl	344.59	247.292	0.720775	0.0410979
ENSRNOG00000024815	Lkaaear1	ensembl	3.3107	0.296242	0.132265	0.0411148
ENSRNOG00000012266	Zcchc17	ensembl	2237.77	2609.34	1.16733	0.0411157
ENSRNOG00000008001	Rab3b	ensembl	767.876	609.181	0.79512	0.0411356
ENSRNOG00000057972	NEWGENE_1562258	ensembl	116.524	157.919	1.35471	0.0412233
ENSRNOG00000042623	Sh2d4b	ensembl	20.3771	34.6905	1.70689	0.041307
ENSRNOG00000000438	Rnf5	ensembl_havana	282.165	364.128	1.29085	0.0413392
ENSRNOG00000048487	Slc12a9	ensembl_havana	123.612	168.461	1.36871	0.041341
ENSRNOG00000016213	Ssbp2	ensembl	1165.41	927.163	0.797597	0.041382
ENSRNOG00000046927	AC097575.1	ensembl	17.4992	8.80056	0.505728	0.0414
ENSRNOG00000011572	Klc1	ensembl	7086.12	8271.1	1.16856	0.0414135
ENSRNOG00000008340	RGD1309779	ensembl	4.57517	11.6446	2.4372	0.0414281
ENSRNOG00000026528	Mrps33	ensembl	508.625	412.512	0.811632	0.0414555
ENSRNOG00000006697	Tmem55a	ensembl	1306.47	1108.56	0.849854	0.0414707
ENSRNOG00000028255	Usp36	ensembl	569.368	677.449	1.19247	0.0415044
ENSRNOG00000007552	Arhgap36	ensembl	482.267	393.079	0.816653	0.0415299
ENSRNOG00000051298	Rn50_X_0713.4	havana	19.9344	9.24777	0.470126	0.0415903
ENSRNOG00000013330	Cdhr1	ensembl	104.082	65.8197	0.636444	0.0416066
ENSRNOG00000011136	Osr2	ensembl	0.331428	3.23502	7.13947	0.0417883
ENSRNOG00000051694	AABR07065651.5	ensembl	3.05226	0	0.0388282	0.0417949
ENSRNOG00000047782	RGD1309808	ensembl	41.934	24.5127	0.591402	0.0418458
ENSRNOG00000057143	Rn50_10_0701.3	havana	0	2.45167	21.0428	0.0418742
ENSRNOG00000020294	Scgb1d2	ensembl	0	2.45167	21.0428	0.0418901
ENSRNOG00000018359	Smad7	ensembl	540.369	658.16	1.21991	0.0419005
ENSRNOG00000005724	Map3k7	ensembl	532.797	434.03	0.815944	0.0419229
ENSRNOG00000031560	AABR07030162.1	ensembl	428.176	536.198	1.25421	0.04198
ENSRNOG00000052453	AABR07019254.1	ensembl	7.35811	2.25158	0.311272	0.0420548
ENSRNOG00000028529	AC134651.1	ensembl	1.6882	5.76939	3.19232	0.0420886
ENSRNOG00000014380	LOC102555672	ensembl	505.106	415.409	0.823103	0.0420908
ENSRNOG00000027295	LOC100911293	ensembl	244.534	185.795	0.761218	0.04213
ENSRNOG00000011980	Lrrc7	ensembl	839.268	702.566	0.838556	0.0421339
ENSRNOG00000016872	Lppr4	ensembl	2570.15	2197.29	0.855837	0.0421713
ENSRNOG00000055958	AABR07007584.3	ensembl	7.63931	2.33284	0.302693	0.0422463
ENSRNOG00000017036	Sec11c	ensembl	6744.09	7836.96	1.16343	0.0422557
ENSRNOG00000038274	AABR07051533.1	ensembl	3.97714	0	0.03	0.0423261
ENSRNOG00000004503	L3hypdh	ensembl	58.9721	38.0741	0.648175	0.0423518
ENSRNOG00000017447	Eif2s2	ensembl	4094.19	4720.18	1.15431	0.0423687
ENSRNOG00000049766	Sctr	ensembl	37.7137	59.8618	1.57689	0.0424308
ENSRNOG00000030750	Zfp2	ensembl	591.742	479.856	0.811671	0.0424396
ENSRNOG00000013583	Tbc1d8	ensembl	350.61	279.807	0.799169	0.0424626
ENSRNOG00000021611	Clip2	ensembl	2791.46	3250.95	1.16636	0.042471
ENSRNOG00000006500	Snf8	ensembl	738.29	931.725	1.265	0.0425448
ENSRNOG00000057062	AABR07011908.1	ensembl	3.51148	0.296242	0.117136	0.0425553
ENSRNOG00000000552	Col13a1	ensembl	66.3558	97.6063	1.47617	0.0425759
ENSRNOG00000005988	Arl8a	ensembl	1426.05	1677.1	1.17779	0.0425992
ENSRNOG00000003302	Flcn	ensembl	704.269	579.476	0.825055	0.0426001
ENSRNOG00000020674	Rpl27	ensembl	790.283	657.969	0.833067	0.0426282
ENSRNOG00000012106	Dnaja4	ensembl	2418.94	2866.7	1.18736	0.042651
ENSRNOG00000025290	Map3k15	ensembl	55.7328	35.7878	0.646442	0.0426511
ENSRNOG00000039902	Lbh	ensembl	409.518	499.897	1.22128	0.0426805
ENSRNOG00000054319	AABR07015850.1	ensembl	9.02713	18.0088	1.94157	0.0426811
ENSRNOG00000011678	Wbp4	ensembl	300.246	387.065	1.28823	0.0426878
ENSRNOG00000031778	Mef2d	ensembl	307.548	383.888	1.25009	0.0427255
ENSRNOG00000002270	Hnrnpdl	ensembl	3618.3	4211.92	1.16582	0.0427427
ENSRNOG00000055217	SNORA42	ensembl	40.5745	23.8869	0.590246	0.042784
ENSRNOG00000031503	Olr1111	ensembl	3.04496	0.337108	0.138599	0.0427949
ENSRNOG00000026514	Wdr93	ensembl	19.6451	7.56078	0.397316	0.0428014
ENSRNOG00000046183	AABR07055280.1	ensembl	1517.22	1769.63	1.16785	0.0428217
ENSRNOG00000007946	Bcl2l1	ensembl	762.376	907.407	1.19285	0.0428539
ENSRNOG00000019381	Eri3	ensembl	618.723	483.304	0.782682	0.0428898
ENSRNOG00000027628	Elp5	ensembl	475.87	385.55	0.811805	0.0429301
ENSRNOG00000050091	Efcab1	ensembl	774.713	529.161	0.685004	0.0429373
ENSRNOG00000055947	7SK	ensembl	9909.39	15353.1	1.55215	0.0429973
ENSRNOG00000053898	SNORA24	ensembl	72.3342	104.792	1.44506	0.0431759
ENSRNOG00000046254	Adgre1	ensembl	361.67	274.587	0.76003	0.0432502
ENSRNOG00000047933	Phykpl	ensembl	119.521	168.662	1.40674	0.0432628
ENSRNOG00000010727	Ube2r2	ensembl_havana	938.501	1105.02	1.17872	0.0432799
ENSRNOG00000018547	Mrpl46	ensembl	416.079	333.763	0.802034	0.043299
ENSRNOG00000023781	Plec	ensembl	5773.46	6994.09	1.21357	0.043337
ENSRNOG00000051284	Rn50_1_0913.2	havana	1528.8	1857.15	1.21525	0.0433625
ENSRNOG00000056187	AC132752.1	ensembl	2.66702	0	0.0461347	0.0433922
ENSRNOG00000018167	Tmem221	ensembl	2.66702	0	0.0461344	0.0434044
ENSRNOG00000010431	Msh4	ensembl	1.35677	5.12209	3.49237	0.0434244
ENSRNOG00000058870	Mroh7	ensembl	41.3222	61.3988	1.48982	0.0434439
ENSRNOG00000053518	Zscan26	ensembl_havana	1982.2	1704.7	0.8613	0.0434929
ENSRNOG00000046280	Tceal5	ensembl	203.427	258.384	1.2718	0.0435111
ENSRNOG00000015859	Chdh	ensembl	68.2951	45.8922	0.676291	0.0436918
ENSRNOG00000026880	Usp38	ensembl	538.519	442.46	0.823128	0.043698
ENSRNOG00000029273	E2f3	ensembl_havana	180.316	235.965	1.30818	0.0437552
ENSRNOG00000020693	Tmem138	ensembl	146.51	107.042	0.734193	0.0438525
ENSRNOG00000053860	Olr1742	ensembl_havana	0	2.74791	23.4636	0.0438771
ENSRNOG00000029811	Kcne2	ensembl	121.188	44.0429	0.365564	0.0439408
ENSRNOG00000007124	Krcc1	ensembl	1505.19	1784.2	1.18719	0.04399
ENSRNOG00000058711	AABR07034598.1	ensembl	4.37439	0.647294	0.17388	0.0440287
ENSRNOG00000026502	Dscc1	ensembl	34.4917	20.1898	0.590194	0.0440294
ENSRNOG00000043007	Rcn3	ensembl	900.886	1117.57	1.24129	0.0440811
ENSRNOG00000001700	Dfnb31	ensembl	161.881	214.726	1.33005	0.0440928
ENSRNOG00000009845	Acadm	ensembl	1539.49	1824.51	1.18734	0.0441003
ENSRNOG00000011820	Acpp	ensembl	6.05157	1.60381	0.275102	0.0441699
ENSRNOG00000025589	Jph4	ensembl	136.365	181.34	1.33585	0.0441734
ENSRNOG00000053840	Fam47e	ensembl	9.86643	1.64516	0.177444	0.0442584
ENSRNOG00000061006	AABR07017208.2	ensembl	0.331428	2.83012	6.36976	0.0443047
ENSRNOG00000022309	Frem1	ensembl	115.854	52.7012	0.457933	0.0443212
ENSRNOG00000058901	SNORA17	ensembl	2.45881	7.23665	2.90425	0.0443407
ENSRNOG00000057589	Rnf11l1	ensembl	1163.03	983.475	0.846474	0.0444794
ENSRNOG00000050262	LOC102547011	ensembl	5.34578	12.0082	2.18146	0.0445391
ENSRNOG00000011195	Prkra	ensembl	733.856	618.448	0.844211	0.044548
ENSRNOG00000012665	Nmrk1	ensembl	91.3325	126.963	1.38617	0.0445675
ENSRNOG00000059268	Ppp1r10	ensembl_havana	746.362	889.254	1.19332	0.0445675
ENSRNOG00000007916	Ptk2	ensembl	2731.52	2236.85	0.820214	0.0445954
ENSRNOG00000050287	LOC100912375	ensembl_havana	596.028	744.42	1.25176	0.0447391
ENSRNOG00000023908	Egfem1	ensembl	113.534	75.0944	0.659509	0.0447429
ENSRNOG00000001429	Lrwd1	ensembl	91.0744	63.133	0.695746	0.0448248
ENSRNOG00000014552	Zfp239	ensembl	92.1562	65.1181	0.706975	0.0449026
ENSRNOG00000023085	Pmel	ensembl	128.175	88.3114	0.688197	0.0449773
ENSRNOG00000053502	Arhgef17	ensembl	466.631	380.027	0.816156	0.044989
ENSRNOG00000060571	Tmem189	ensembl	562.419	675.97	1.20296	0.0450396
ENSRNOG00000018704	Nolc1	ensembl	2781.51	3233.57	1.16381	0.045052
ENSRNOG00000052057	AABR07006727.1	ensembl	15.6175	27.3095	1.74567	0.0450753
ENSRNOG00000028747	AABR07073039.1	ensembl	1232.24	1508.62	1.22662	0.0451997
ENSRNOG00000045772	A2m	ensembl	596.163	722.233	1.21218	0.0452756
ENSRNOG00000046440	AABR07071393.1	ensembl	9.07664	1.61823	0.19165	0.0452955
ENSRNOG00000021685	Cdk5r1	ensembl	510.659	634.8	1.24729	0.0453191
ENSRNOG00000037196	Spag17	ensembl	48.0076	13.0223	0.274177	0.0453661
ENSRNOG00000008036	Dennd4c	ensembl	2161.73	1847.53	0.855367	0.0453664
ENSRNOG00000032070	Dync2h1	ensembl	2028.43	1722.8	0.850529	0.0453974
ENSRNOG00000002106	Usp46	ensembl	2146.04	1845.21	0.860652	0.0454381
ENSRNOG00000014584	Odf2	ensembl	1783.96	2077.62	1.16661	0.0454808
ENSRNOG00000054841	AABR07035008.2	ensembl	7.82835	2.8984	0.374818	0.0455199
ENSRNOG00000030705	Cpsf1	ensembl	518.658	384.665	0.742815	0.0455563
ENSRNOG00000024671	Dmxl1	ensembl	6298.54	5455.71	0.867197	0.0455582
ENSRNOG00000039717	Ipo11	ensembl	805.457	675.205	0.839814	0.0456586
ENSRNOG00000060048	Eif2s3y	ensembl	3236.59	3708.63	1.14745	0.0456593
ENSRNOG00000026455	Gpd1l	ensembl	310.198	226.521	0.730411	0.045672
ENSRNOG00000053658	AABR07044569.1	ensembl	4.40173	0.956997	0.236135	0.0456738
ENSRNOG00000055314	Msrb1	ensembl	322.142	249.95	0.778431	0.0457064
ENSRNOG00000060937	AABR07059258.1	ensembl	69.5403	47.118	0.678512	0.0457725
ENSRNOG00000003310	Tmem63a	ensembl	253.719	192.631	0.761155	0.0458978
ENSRNOG00000007645	Kcnj9	ensembl	364.185	447.827	1.23044	0.0459583
ENSRNOG00000001033	Nufip1	ensembl	501.289	624.18	1.24505	0.0460001
ENSRNOG00000054483	AABR07012711.1	ensembl	2.57844	8.27683	3.25476	0.0460268
ENSRNOG00000052469	Bmpr1a	ensembl	1974.74	1686.63	0.854856	0.0460292
ENSRNOG00000016271	Itm2b	ensembl	13862.1	12008.5	0.86743	0.0461029
ENSRNOG00000052562	SNORA32	ensembl	0.331428	2.91186	6.43882	0.0461275
ENSRNOG00000056358	Ccdc27	ensembl	4.00461	10.7448	2.70595	0.0461289
ENSRNOG00000056032	AABR07035780.1	ensembl	2.82129	7.85702	2.78127	0.0461789
ENSRNOG00000026985	Phldb1	ensembl	1858.77	2305.58	1.24317	0.0462214
ENSRNOG00000033615	Mt-nd3	insdc	19300.5	16310.4	0.846183	0.046244
ENSRNOG00000021900	AABR07055834.1	ensembl	148.929	107.667	0.724481	0.0462974
ENSRNOG00000018236	Cym	ensembl	32.3379	49.7721	1.53996	0.0463034
ENSRNOG00000004430	Cep131	ensembl	641.531	804.022	1.25715	0.0463461
ENSRNOG00000005336	Prss27	ensembl	5.03353	1.01133	0.209465	0.0463555
ENSRNOG00000053362	Gabarapl1	ensembl	9856.66	11377.6	1.156	0.0463622
ENSRNOG00000055020	LOC679731	havana	174.108	225.591	1.29759	0.0463678
ENSRNOG00000054771	SNORD116	ensembl	6.92994	2.30591	0.337598	0.0463838
ENSRNOG00000037331	Cd33	ensembl	78.5267	53.2956	0.682739	0.0463865
ENSRNOG00000047935	Chsy3l	ensembl	10.8998	3.62646	0.332983	0.0464217
ENSRNOG00000003872	Slc40a1	ensembl	73.5184	48.2678	0.657624	0.0464276
ENSRNOG00000019958	Tmem151b	ensembl	260.613	338.198	1.30047	0.0464447
ENSRNOG00000001483	Wbscr16	ensembl	155.645	115.256	0.7402	0.0464516
ENSRNOG00000053172	Ssr4	ensembl	1016.42	1221.99	1.20442	0.0464545
ENSRNOG00000013587	Fam135a	ensembl	1283.52	1077.48	0.84028	0.0465007
ENSRNOG00000000129	Phf24	ensembl	409.99	503.181	1.22639	0.0465659
ENSRNOG00000048244	LOC100911002	ensembl	0.732262	3.50434	4.44089	0.0466203
ENSRNOG00000054838	Mcrs1	ensembl	251.062	181.816	0.725589	0.0466295
ENSRNOG00000034246	Rps27a-ps1	ensembl	15942.7	19084.9	1.19871	0.0466308
ENSRNOG00000011723	Slc44a3	ensembl	46.1677	28.7475	0.628176	0.0466536
ENSRNOG00000032708	RT1-Bb	ensembl_havana	61.5295	40.1372	0.656199	0.0466657
ENSRNOG00000023100	Tctex1d1	ensembl	65.1234	40.5348	0.624559	0.0466822
ENSRNOG00000012016	Npc1	ensembl	1430.26	1214.44	0.850481	0.0466931
ENSRNOG00000061946	Rn60_X_0693.1	havana	0.400833	3.92415	8.39549	0.0467093
ENSRNOG00000007998	Ssb	ensembl	2473.24	2943.7	1.19139	0.0467576
ENSRNOG00000009409	Fbxo2	ensembl	1223.95	1491.77	1.2219	0.0467695
ENSRNOG00000019217	Adrb2	ensembl	30.5063	17.6458	0.577758	0.0467892
ENSRNOG00000059179	AABR07014125.2	ensembl	2.2433	0	0.0506367	0.0467909
ENSRNOG00000020899	Fgf19	ensembl	2.2433	0	0.0506371	0.0468092
ENSRNOG00000005883	Nek10	ensembl	109.731	72.2017	0.662102	0.0469249
ENSRNOG00000020495	Eif3k	ensembl	1687.58	1953.69	1.15894	0.0469446
ENSRNOG00000060599	Gabrb3	ensembl_havana	1194.91	988.318	0.827241	0.0469502
ENSRNOG00000030819	AABR07036974.1	ensembl	20.8557	10.9323	0.530675	0.0469931
ENSRNOG00000053845	Hist1h2bl	ensembl	36.0073	22.3996	0.625823	0.0470257
ENSRNOG00000033772	Serpinb9	ensembl	662.867	551.872	0.834	0.0470506
ENSRNOG00000030644	Mt-nd1	insdc	33698.1	45982.1	1.36546	0.0470576
ENSRNOG00000005402	AABR07040938.1	ensembl	238.773	303.396	1.27147	0.0470824
ENSRNOG00000014901	Uggt1	ensembl	3368.39	2901.85	0.862687	0.0471248
ENSRNOG00000029416	Zfp952	ensembl	378.871	301.697	0.798477	0.047139
ENSRNOG00000005689	Yeats4	ensembl	871.381	1027.54	1.18048	0.0473203
ENSRNOG00000051193	LOC100911361	havana	590.215	727.635	1.23681	0.0475321
ENSRNOG00000015913	Tspan5	ensembl	1345.44	1562.76	1.16317	0.0475385
ENSRNOG00000020605	Pstk	ensembl	627.55	527.008	0.84119	0.0475799
ENSRNOG00000007002	Lif	ensembl	6.42865	1.56342	0.258779	0.0475856
ENSRNOG00000008061	Nuak1	ensembl	706.273	828.092	1.17433	0.0476373
ENSRNOG00000037302	Rad51	ensembl	44.779	26.5595	0.601145	0.0476814
ENSRNOG00000006684	Zfp317	ensembl	737.53	610.611	0.828155	0.0477208
ENSRNOG00000059651	7SK	ensembl	9567.96	15057.7	1.57662	0.0477348
ENSRNOG00000037898	AABR07034761.1	ensembl	5.81974	1.26718	0.240552	0.0477616
ENSRNOG00000008516	LOC688684	ensembl	1514.1	1841.17	1.21864	0.0477861
ENSRNOG00000026964	Gas8	ensembl	236.814	305.783	1.29556	0.047826
ENSRNOG00000034233	Fyttd1	ensembl	1524.78	1253.52	0.822514	0.0478304
ENSRNOG00000012417	Iapp	ensembl	3.13726	0	0.039385	0.0478332
ENSRNOG00000047175	Cryaa	ensembl	8.48749	2.64302	0.309033	0.0478374
ENSRNOG00000018681	Nes	ensembl	366.138	446.349	1.21907	0.0478566
ENSRNOG00000000418	Zbtb12	ensembl_havana	45.3888	68.6986	1.51593	0.0478613
ENSRNOG00000015591	Cndp2	ensembl	1244.59	1473.73	1.18585	0.04789
ENSRNOG00000020296	LOC103693430	ensembl	163.29	116.829	0.717703	0.0478931
ENSRNOG00000028477	Med8	ensembl	290.622	363.91	1.25651	0.0479007
ENSRNOG00000016384	Pik3cb	ensembl	348.582	275.544	0.79244	0.0479462
ENSRNOG00000059212	AABR07025303.1	ensembl	13.9447	24.5685	1.7517	0.0480163
ENSRNOG00000005662	Grm7	ensembl	794.454	663.899	0.836099	0.0480274
ENSRNOG00000060502	SNORD96	ensembl	7.3116	2.52042	0.361165	0.0481179
ENSRNOG00000006749	Tmtc3	ensembl	988.514	838.3	0.849186	0.0482676
ENSRNOG00000005406	Clint1	ensembl	1792.46	2085.85	1.1651	0.0483057
ENSRNOG00000055096	AABR07002768.1	ensembl	2273.22	2619.49	1.15356	0.0484238
ENSRNOG00000032739	Thoc1	ensembl	13.8416	26.7978	1.91467	0.0484253
ENSRNOG00000046484	Ccdc160	ensembl	212.077	276.595	1.30212	0.0484391
ENSRNOG00000020791	Ube2q1	ensembl	2165.34	2491.46	1.15218	0.0484536
ENSRNOG00000039819	Cdk8	ensembl_havana	1309.5	1097.07	0.838227	0.0484753
ENSRNOG00000022586	Cdk9	ensembl	331.337	264.365	0.798957	0.0485038
ENSRNOG00000022012	Tnfrsf18	ensembl	1.42617	5.05382	3.45115	0.048533
ENSRNOG00000026296	Saxo2	ensembl	40.4036	12.1577	0.305456	0.048548
ENSRNOG00000026600	Caps2	ensembl	25.2485	10.0264	0.407328	0.0485493
ENSRNOG00000003884	Acmsd	ensembl	4.56701	11.2555	2.4474	0.0485735
ENSRNOG00000005043	Cpeb2	ensembl	423.441	344.577	0.814999	0.0485835
ENSRNOG00000017609	Cnga4	ensembl	1.37594	5.16248	3.49996	0.0485966
ENSRNOG00000027761	Htatsf1	ensembl	2309.41	2702.76	1.1713	0.0486292
ENSRNOG00000054213	U6	ensembl	0.643681	3.75972	4.8549	0.0486561
ENSRNOG00000023485	Ushbp1	ensembl	86.7728	121.913	1.40263	0.0486622
ENSRNOG00000013533	Acin1	ensembl	2078.32	2401.92	1.1574	0.0487129
ENSRNOG00000047884	AABR07001923.1	ensembl	362.402	274.188	0.757699	0.0487134
ENSRNOG00000017478	Pcsk7	ensembl	453.41	549.417	1.21377	0.0487973
ENSRNOG00000048337	AC126148.1	ensembl	1586.32	1878.11	1.185	0.0488334
ENSRNOG00000056279	AC115369.1	ensembl	5.92378	1.64516	0.287758	0.0489147
ENSRNOG00000030413	Tas2r137	ensembl	5.67363	1.34843	0.24781	0.0489651
ENSRNOG00000013790	Mfsd1	ensembl	656.151	546.703	0.833773	0.0490199
ENSRNOG00000050784	AABR07054000.1	ensembl	112.641	173.86	1.54647	0.0490607
ENSRNOG00000025160	Tmem56	ensembl	637.71	406.633	0.639082	0.0492241
ENSRNOG00000027238	Jrk	ensembl_havana	252.893	318.909	1.26391	0.0492821
ENSRNOG00000047566	AABR07059807.1	ensembl	44.4519	66.7377	1.49055	0.0493714
ENSRNOG00000019206	P8	ensembl	1259.61	1509.89	1.19955	0.0493714
ENSRNOG00000023387	LOC679739	ensembl_havana	271.413	359.925	1.33186	0.0493751
ENSRNOG00000009061	Cfap206	ensembl	42.4971	15.6755	0.373725	0.0493778
ENSRNOG00000010306	H2afz	ensembl	112.948	82.7818	0.733724	0.0493881
ENSRNOG00000015519	Ces1d	ensembl	25.8658	6.70916	0.267818	0.0493976
ENSRNOG00000031383	LOC362901	ensembl	0	2.15591	18.6646	0.049554
ENSRNOG00000017151	Rnf214	ensembl	1022.8	1265.83	1.23812	0.0496437
ENSRNOG00000018040	Gins4	ensembl	92.2398	59.005	0.639523	0.049649
ENSRNOG00000028904	Vps9d1	ensembl	241.501	188.644	0.783153	0.0497203
ENSRNOG00000029971	Mt-nd5	insdc	51595.4	71120.2	1.37936	0.0497542
ENSRNOG00000029366	Prrt2	ensembl	1165.99	1379.15	1.18397	0.0498274
ENSRNOG00000057275	AABR07059024.1	ensembl	5.78497	1.26718	0.235187	0.0498297
ENSRNOG00000007923	Cgref1	ensembl	637.888	783.132	1.22839	0.0498412
ENSRNOG00000000879	Slc9a6	ensembl	3172.64	2691.93	0.849227	0.0498508
ENSRNOG00000003183	Fmod	ensembl	1426.32	1692.79	1.18798	0.0499644
ENSRNOG00000046279	AABR07063703.1	ensembl	25.7276	40.8402	1.60256	0.050076
ENSRNOG00000015359	Arhgap40	ensembl	1.37594	5.24093	3.62785	0.0501593
ENSRNOG00000017387	Olr201	ensembl	0	2.31937	19.3913	0.0501727
ENSRNOG00000022386	Opalin	ensembl	2061.54	2505.66	1.2175	0.0501867
ENSRNOG00000003464	Hid1	ensembl	1210.07	1431.15	1.18437	0.0502195
ENSRNOG00000055428	AABR07060963.1	ensembl	3.64571	0	0.0326225	0.0502203
ENSRNOG00000052224	Celf6	ensembl	971.876	1183.69	1.21818	0.0502992
ENSRNOG00000055770	LOC103692519	ensembl	30.8698	18.4792	0.60256	0.0503003
ENSRNOG00000048495	Rrp12	ensembl	310.391	386.639	1.24838	0.0503314
ENSRNOG00000057019	7SK	ensembl	2.95638	0.323647	0.140115	0.0503402
ENSRNOG00000016057	Kcnj13	ensembl_havana	454.763	309.504	0.683329	0.0503805
ENSRNOG00000010785	Helt	ensembl	15.0817	6.16082	0.418199	0.05041
ENSRNOG00000012427	Veph1	ensembl	132.709	94.6721	0.715666	0.0504597
ENSRNOG00000035526	Mir3588	ensembl	40.4348	22.3187	0.555862	0.0504776
ENSRNOG00000035578	Mir19a	ensembl	5.22629	0.929592	0.207052	0.0504935
ENSRNOG00000017585	Abt1	ensembl	324.206	403.438	1.24714	0.050512
ENSRNOG00000028062	Arpc5	ensembl_havana	969.141	827.33	0.854765	0.0505157
ENSRNOG00000057867	Mns1	ensembl	408.915	218.213	0.535732	0.0505947
ENSRNOG00000061394	Clec4e	ensembl	0	2.18331	18.7907	0.0505976
ENSRNOG00000020922	Hspb6	ensembl	114.408	151.034	1.3227	0.0506077
ENSRNOG00000011024	Zdhhc20	ensembl	1886.31	1626.5	0.86325	0.0506214
ENSRNOG00000032297	Msmo1	ensembl	2633.32	2282.43	0.867856	0.0506351
ENSRNOG00000016733	Rab13	ensembl	451.874	551.215	1.22264	0.0507025
ENSRNOG00000032788	Dysf	ensembl	134.678	183.631	1.36612	0.0507039
ENSRNOG00000048622	Sin3b	ensembl	1566.93	1809.55	1.15601	0.0507319
ENSRNOG00000049208	AABR07054456.3	ensembl	17.5457	8.20711	0.467369	0.05078
[truncated: 19,053 more rows]
