# Supplementary material for: A preliminary study of the effect of a high-salt diet on transcriptome dynamics in rat hypothalamic forebrain and brainstem cardiovascular control centers
Source: PeerJ. 2020 Mar 3;8:e8528. doi: 10.7717/peerj.8528 (PMC7059759; doi:10.7717/peerj.8528)
Supplement: Table S4 [file peerj-08-8528-s004.xlsx]

## Sheet: S4_PVN_SRSvsSHS
Supplemental Table S4: RNA-Seq datasets for PVN
	GeneName	GeneType	DESeq.shrnd.AvgCount	DESeq.shrhs.AvgCount	edgeR.foldChange	edgeR.PValue
ENSRNOG00000061007	AABR07021888.1	ensembl	125.216	12.2796	0.0999547	2.96e-22
ENSRNOG00000025338	Msi2	ensembl	717.874	184.971	0.258704	5.3e-14
ENSRNOG00000006608	Tmem70	ensembl	238.887	526.52	2.21235	1.88e-10
ENSRNOG00000021229	Avp	ensembl	5415.72	9331.38	1.73105	8.45e-09
ENSRNOG00000006500	Snf8	ensembl	683.046	1262.04	1.85573	1.43e-08
ENSRNOG00000003983	Pfdn2	ensembl	815.017	1442.21	1.77688	2.24e-08
ENSRNOG00000007174	Utp11l	ensembl	570.012	288.747	0.509319	4.05e-08
ENSRNOG00000014139	Sclt1	ensembl	3065.61	1634.64	0.535934	4.98e-08
ENSRNOG00000007625	B3galt1	ensembl	280.654	563.165	2.01516	6.01e-08
ENSRNOG00000004509	Eapp	ensembl	1114.54	627.077	0.565859	7.16e-08
ENSRNOG00000030478	AY172581.9	insdc	28926.5	142116	4.9276	1.15e-07
ENSRNOG00000028630	Ksr2	ensembl_havana	214.047	408.786	1.91461	1.32e-07
ENSRNOG00000003550	Acbd6	ensembl	1499.81	742.994	0.498618	2.4e-07
ENSRNOG00000059112	AABR07070599.1	ensembl	215.475	414.241	1.92823	2.41e-07
ENSRNOG00000027156	Morn4	ensembl	306.132	567.244	1.8631	2.68e-07
ENSRNOG00000002365	Itm2a	ensembl	555.203	1007.8	1.82194	2.82e-07
ENSRNOG00000020058	Celsr2	ensembl	697.456	1233.39	1.77519	2.85e-07
ENSRNOG00000014549	Arhgef26	ensembl	380.754	688.453	1.81506	3.25e-07
ENSRNOG00000008455	Tmem87a	ensembl	469.89	256.382	0.547211	3.72e-07
ENSRNOG00000006400	Tbc1d14	ensembl	313.252	679.853	2.17593	9.05e-07
ENSRNOG00000001708	Dvl3	ensembl	130.145	260.577	2.00591	1.02e-06
ENSRNOG00000018569	Ahcyl1	ensembl	4375.79	7702.69	1.76735	1.07e-06
ENSRNOG00000000852	Prrc2a	ensembl_havana	509.311	960.032	1.89026	1.38e-06
ENSRNOG00000047628	Khsrp	ensembl	324.181	542.855	1.68403	1.53e-06
ENSRNOG00000018992	Dpysl3	ensembl	389.193	804.449	2.07211	1.92e-06
ENSRNOG00000015182	Ppp2cb	ensembl	1879.14	1126.98	0.602781	2.02e-06
ENSRNOG00000001004	Ncor2	ensembl	412.968	720.017	1.75116	2.17e-06
ENSRNOG00000017708	AABR07073038.1	ensembl	777.478	1214.21	1.56791	2.22e-06
ENSRNOG00000016684	Wnk2	ensembl	431.92	715.011	1.66204	2.28e-06
ENSRNOG00000013548	Sepw1	ensembl	153.38	35.1903	0.230074	2.87e-06
ENSRNOG00000002768	Tmem114	ensembl	31.8098	89.3199	2.83225	3.55e-06
ENSRNOG00000017172	Mvb12b	ensembl	404.539	644.413	1.59902	3.74e-06
ENSRNOG00000021215	Rbm8a	ensembl	402.127	780.059	1.94682	4.01e-06
ENSRNOG00000014675	Pi4k2a	ensembl	108.971	232.145	2.13122	4.27e-06
ENSRNOG00000033133	Nae1	ensembl_havana	1332.73	799.309	0.602668	6.34e-06
ENSRNOG00000020821	Clip3	ensembl	233.844	431.958	1.85115	7.14e-06
ENSRNOG00000032204	Uqcrb	ensembl	1681.46	2462.21	1.47118	7.17e-06
ENSRNOG00000000990	Pdap1	ensembl_havana	3003	4678.75	1.56492	7.28e-06
ENSRNOG00000043866	AY172581.24	insdc	223093	407375	1.83272	7.34e-06
ENSRNOG00000004629	Fkbp3	ensembl_havana	6870.53	4727.88	0.691259	9.56e-06
ENSRNOG00000030714	Bsn	ensembl	867.074	1363.21	1.57811	1.01e-05
ENSRNOG00000002122	Lrrc8c	ensembl	185.574	383.819	2.07187	1.03e-05
ENSRNOG00000017426	Rragc	ensembl	770.684	1221.05	1.59177	1.04e-05
ENSRNOG00000042044	Stard3	ensembl	68.2672	165.013	2.42221	1.06e-05
ENSRNOG00000048470	Pomp	ensembl	671.682	325.956	0.487553	1.08e-05
ENSRNOG00000008656	Snca	ensembl	689.49	416.283	0.606656	1.1e-05
ENSRNOG00000028611	AABR07037203.1	ensembl	199.275	414.82	2.08574	1.14e-05
ENSRNOG00000018295	Ccar2	ensembl	318.048	612.749	1.93501	1.19e-05
ENSRNOG00000042951	Xrn1	ensembl	682.994	1083.22	1.59294	1.36e-05
ENSRNOG00000008075	Ift74	ensembl	2386.07	1409.16	0.593927	1.38e-05
ENSRNOG00000007051	Rraga	ensembl_havana	693.354	1202.03	1.74086	1.39e-05
ENSRNOG00000014575	Rtcd1	ensembl	2085.43	1183.07	0.569589	1.4e-05
ENSRNOG00000050282	Srcap	ensembl	879.287	1299.83	1.48521	1.41e-05
ENSRNOG00000013013	Tle3	ensembl	255.75	440.905	1.72847	1.45e-05
ENSRNOG00000005355	Ncstn	ensembl	965.526	540.96	0.561726	1.5e-05
ENSRNOG00000019207	Shank1	ensembl_havana	896.702	1515.32	1.69678	1.62e-05
ENSRNOG00000010021	Isy1	ensembl	915.383	498.228	0.546818	1.67e-05
ENSRNOG00000013250	Pdcd5	ensembl	992.793	457.443	0.462529	1.71e-05
ENSRNOG00000024482	Tnrc18	ensembl	240.545	458.949	1.9128	1.82e-05
ENSRNOG00000061544	Spock2	ensembl	2135.04	3329.15	1.56554	2.05e-05
ENSRNOG00000012874	Rgma	ensembl_havana	314.131	527.044	1.68194	2.06e-05
ENSRNOG00000002833	Gsk3b	ensembl	1365.83	2210.27	1.62407	2.2e-05
ENSRNOG00000053550	Itga1	ensembl	75.8195	161.221	2.13627	2.27e-05
ENSRNOG00000021085	Sf1	ensembl	841.736	1254.51	1.49577	2.35e-05
ENSRNOG00000012219	Snrnp40	ensembl	486.589	261.506	0.538929	2.49e-05
ENSRNOG00000005234	Gxylt1	ensembl	544.489	860.253	1.58777	2.78e-05
ENSRNOG00000048248	LOC100910446	ensembl	299.715	117.655	0.394193	2.79e-05
ENSRNOG00000019272	Gkap1	ensembl	2419.13	1417.12	0.588775	2.8e-05
ENSRNOG00000051957	AC126897.1	ensembl	21.7163	57.7568	2.66312	2.82e-05
ENSRNOG00000033653	Mpp3	ensembl	57.0673	181.06	3.17037	2.92e-05
ENSRNOG00000012266	Zcchc17	ensembl	3322.21	2043.36	0.617919	3.02e-05
ENSRNOG00000042788	LOC102546963	ensembl	65.2712	171.034	2.6232	3.11e-05
ENSRNOG00000023605	Ncbp1	ensembl	1136.82	1708.18	1.50924	3.27e-05
ENSRNOG00000010409	Nol6	ensembl_havana	502.938	825.709	1.64779	3.27e-05
ENSRNOG00000003919	Rps6kb1	ensembl	1363.46	912.24	0.671911	3.65e-05
ENSRNOG00000054314	Kcng1	ensembl	18.1332	68.8798	3.76368	3.93e-05
ENSRNOG00000009462	Ccdc90b	ensembl	813.886	513.249	0.633525	4.24e-05
ENSRNOG00000001352	Hectd4	ensembl	1200.66	1966.16	1.64353	4.24e-05
ENSRNOG00000019670	Wdr3	ensembl	1090.05	696.735	0.641769	4.42e-05
ENSRNOG00000009845	Acadm	ensembl	1103.07	613.961	0.558918	4.79e-05
ENSRNOG00000018068	Rn50_2_0457.1	havana	50.5249	118.615	2.34387	4.8e-05
ENSRNOG00000029466	RGD1564140	ensembl	1420.9	952.379	0.673389	5.05e-05
ENSRNOG00000051960	Dnajc12	ensembl	838.577	497.137	0.595769	5.84e-05
ENSRNOG00000010488	Zmiz1	ensembl	349.267	644.081	1.853	5.85e-05
ENSRNOG00000033065	Rad50	ensembl	2603.1	1753.85	0.677109	6.01e-05
ENSRNOG00000023360	Fus	ensembl	141.552	240.012	1.70329	6.03e-05
ENSRNOG00000028323	Dhrsx	ensembl	40.8556	89.8272	2.20249	6.05e-05
ENSRNOG00000001449	Pom121	ensembl	360.024	558.094	1.5549	6.12e-05
ENSRNOG00000015614	Ppp1r16b	ensembl	529.036	817.659	1.55237	6.29e-05
ENSRNOG00000019953	Ube2f	ensembl	228.867	67.9763	0.300003	6.35e-05
ENSRNOG00000022893	Rimbp2	ensembl	311.763	485.046	1.56136	6.72e-05
ENSRNOG00000015018	Pdia3	ensembl	4742.31	6713.68	1.42197	6.91e-05
ENSRNOG00000002607	Sox9	ensembl	271.981	481.003	1.77603	7.43e-05
ENSRNOG00000003967	Vmp1	ensembl	1740.45	1126.84	0.650955	7.8e-05
ENSRNOG00000050051	Pin4	ensembl_havana	754.767	479.07	0.638293	8.47e-05
ENSRNOG00000061764	Fmn2	ensembl	340.254	553.047	1.63063	8.68e-05
ENSRNOG00000005695	Mgp	ensembl	61.4154	129.756	2.11182	9.06e-05
ENSRNOG00000018916	Bcl7c	ensembl	44.9251	99.116	2.20632	9.42e-05
ENSRNOG00000050578	Rheb	ensembl	1116.21	684.883	0.616033	9.5e-05
ENSRNOG00000008950	Adi1	ensembl	188.698	306.223	1.63008	9.58e-05
ENSRNOG00000021691	Ccdc92	ensembl	1044.88	1529.28	1.46926	9.67e-05
ENSRNOG00000019150	Polb	ensembl	384.751	223.451	0.581778	0.000114052
ENSRNOG00000000541	Glo1	ensembl	2942.83	1774.64	0.605447	0.000116297
ENSRNOG00000010308	Nr2f2	ensembl	501.208	774.004	1.55057	0.000116438
ENSRNOG00000015318	Heyl	ensembl	120.882	220.304	1.82342	0.000117898
ENSRNOG00000006334	Txndc16	ensembl	1982.42	1355.72	0.687267	0.000121411
ENSRNOG00000000885	Auts2	ensembl	162.779	288.314	1.78008	0.0001273
ENSRNOG00000017444	Nrsn1	ensembl	2512.26	3665.56	1.46495	0.000132823
ENSRNOG00000057988	Pfkm	ensembl	6266.32	8814.17	1.41282	0.000138433
ENSRNOG00000017583	Mapkap1	ensembl	1859.47	1232.67	0.666481	0.000143906
ENSRNOG00000030862	Atp6v1h	ensembl	2038.67	1347.65	0.663906	0.000146334
ENSRNOG00000015670	Stx7	ensembl	1585.35	937.715	0.593619	0.000147096
ENSRNOG00000053450	Myadm	ensembl	247.01	402.958	1.63785	0.000159075
ENSRNOG00000007364	Rab15	ensembl	1156.71	808.339	0.702215	0.000160835
ENSRNOG00000013386	Psmb5	ensembl	575.671	874.178	1.5268	0.000165724
ENSRNOG00000010237	Map7d1	ensembl	462.238	988.862	2.14501	0.000168739
ENSRNOG00000017780	Akr7a2	ensembl	140.602	75.1256	0.537587	0.000171973
ENSRNOG00000002932	Wdr19	ensembl	888.756	562.151	0.634694	0.00017792
ENSRNOG00000014049	Riok1	ensembl	1404.62	942.818	0.67436	0.000179654
ENSRNOG00000021540	RGD1563441	ensembl	393.973	587.106	1.49768	0.000184775
ENSRNOG00000051100	Rn50_13_0829.4	havana	1046	716.592	0.688672	0.000185698
ENSRNOG00000018531	Mrps11	ensembl	349.361	200.832	0.577003	0.000188671
ENSRNOG00000053932	Ddx6	ensembl	1449.09	2017.23	1.39783	0.000188944
ENSRNOG00000017146	Nfatc1	ensembl	16.2079	45.6503	2.82167	0.000200681
ENSRNOG00000057168	SNORA17	ensembl	0.348226	10.9464	23.6112	0.000205974
ENSRNOG00000014182	Tns1	ensembl	809.105	1143.54	1.41886	0.000213179
ENSRNOG00000006989	Vamp2	ensembl	5366.13	8038.01	1.50443	0.000232028
ENSRNOG00000053405	Rpap3	ensembl	2733.69	1896.45	0.697349	0.000234167
ENSRNOG00000008329	Ndufb11	ensembl	506.181	724.409	1.43605	0.00023826
ENSRNOG00000020595	Rps11	ensembl	1717.6	1001.48	0.585169	0.000240142
ENSRNOG00000019328	Phgdh	ensembl	1300.8	796.464	0.61494	0.000246546
ENSRNOG00000006908	Pou3f2	ensembl	571.031	825.941	1.45478	0.000250575
ENSRNOG00000015257	Coro2b	ensembl	56.12	128.144	2.28573	0.000252407
ENSRNOG00000015840	Hsd17b4	ensembl	2078.89	1464.52	0.707396	0.000254445
ENSRNOG00000016122	Hmgcr	ensembl	736.053	1209.53	1.64939	0.000256024
ENSRNOG00000001126	Fbxw8	ensembl	232.544	422.436	1.82322	0.000259555
ENSRNOG00000006966	Nfia	ensembl	301.553	452.235	1.50536	0.000261045
ENSRNOG00000018111	Slc12a5	ensembl	1388.96	1938.1	1.40182	0.000267385
ENSRNOG00000025443	Map1lc3a	ensembl	481.157	689.843	1.441	0.000269239
ENSRNOG00000021552	Uprt	ensembl	119.439	220.833	1.85293	0.000270159
ENSRNOG00000029165	Stx1a	ensembl	319.266	152.746	0.479646	0.000270978
ENSRNOG00000015277	Serf2	ensembl	238.115	128.384	0.54176	0.000273988
ENSRNOG00000003670	AABR07030781.1	ensembl	579.257	322.084	0.558384	0.000288903
ENSRNOG00000053210	Zc3h11a	ensembl	924.894	1578.73	1.71172	0.000318351
ENSRNOG00000013920	Arhgap26	ensembl	751.336	1079.22	1.44175	0.00032041
ENSRNOG00000016213	Ssbp2	ensembl	929.19	573.643	0.619186	0.000324275
ENSRNOG00000002778	Aatf	ensembl	1018.42	723.581	0.71416	0.000332148
ENSRNOG00000000802	Tbc1d32	ensembl	519.435	341.634	0.660626	0.000335259
ENSRNOG00000019316	Sh3bp4	ensembl	150.115	251.336	1.67988	0.000351523
ENSRNOG00000047225	Tma7	ensembl	1284.19	760.682	0.595597	0.000352175
ENSRNOG00000015496	Tpm4	ensembl	881.005	578.693	0.659994	0.000358157
ENSRNOG00000009823	Naa38	ensembl	446.153	639.578	1.44017	0.000360174
ENSRNOG00000007172	Map4k3	ensembl	1343.6	933.398	0.697857	0.000374165
ENSRNOG00000009536	Pgp	ensembl	484.199	313.95	0.65214	0.000378287
ENSRNOG00000032391	Esyt2	ensembl	1396.33	960.917	0.691029	0.000378776
ENSRNOG00000008086	Dpf3	ensembl	231.103	131.582	0.572054	0.000380359
ENSRNOG00000020684	Vat1	ensembl	1197.65	1767.38	1.48229	0.000385802
ENSRNOG00000014452	Zfhx3	ensembl	454.17	701.848	1.55056	0.00039618
ENSRNOG00000050104	LOC100911911	ensembl	493.561	732.7	1.48939	0.000401473
ENSRNOG00000000042	Xpr1	ensembl	789.797	1144.39	1.45435	0.000408526
ENSRNOG00000057676	Polr2m	ensembl	3928.89	5354.52	1.3687	0.000408839
ENSRNOG00000014156	Fut7	ensembl	2.85032	17.5388	6.08736	0.000418966
ENSRNOG00000049975	Zfp46	ensembl	437.962	641.831	1.46979	0.000419373
ENSRNOG00000003253	Qdpr	ensembl	503.397	724.605	1.44501	0.000420243
ENSRNOG00000002736	Rabgap1l	ensembl_havana	1965.39	1269.31	0.64849	0.0004204
ENSRNOG00000014909	Sh2d5	ensembl_havana	662.178	419.172	0.636312	0.000431338
ENSRNOG00000020518	Fam189b	ensembl	60.1278	119.069	1.97656	0.000438704
ENSRNOG00000011603	Cab39l	ensembl	1051.63	703.743	0.672465	0.000439518
ENSRNOG00000047761	Zfp326	ensembl_havana	293.89	488.597	1.66845	0.000448942
ENSRNOG00000047319	Caprin2	ensembl	1551.92	2337.86	1.51086	0.000457277
ENSRNOG00000015416	Nabp1	ensembl	512.665	311.698	0.610906	0.000469688
ENSRNOG00000010945	Ywhab	ensembl	6393.69	8581.9	1.34864	0.000471784
ENSRNOG00000015733	Myl12b	ensembl	380.303	574.26	1.5139	0.000496898
ENSRNOG00000009760	Palm	ensembl	251.83	378.924	1.50946	0.000509423
ENSRNOG00000026891	AC093995.1	ensembl	43.9593	17.4875	0.401533	0.00053968
ENSRNOG00000052564	Gpx3	ensembl	821.463	1180.97	1.44413	0.000553194
ENSRNOG00000057042	Pcca	ensembl	706.569	405.078	0.574936	0.00055326
ENSRNOG00000007574	Padi2	ensembl	408.37	602.257	1.48095	0.000556722
ENSRNOG00000017847	Rps19bp1	ensembl_havana	649.742	423.472	0.654927	0.00057518
ENSRNOG00000013474	Casz1	ensembl	16.2045	40.8673	2.52385	0.000578794
ENSRNOG00000005076	Bcorl1	ensembl	180.282	281.084	1.56905	0.000582364
ENSRNOG00000013602	Usp48	ensembl	1015.69	1397.82	1.3825	0.000586898
ENSRNOG00000003203	Hexim1	ensembl	683.171	971.832	1.42825	0.000589469
ENSRNOG00000020392	Stxbp3	ensembl	1436.1	905.062	0.633027	0.000593117
ENSRNOG00000001255	Mlxip	ensembl	79.6184	140.101	1.76163	0.000608857
ENSRNOG00000001717	Opa1	ensembl	5592.67	4100.57	0.736477	0.000630549
ENSRNOG00000043210	Ppp3r1	ensembl_havana	3690.53	4960.05	1.34984	0.000632412
ENSRNOG00000059720	Syp	ensembl	4384.95	6045.94	1.385	0.00063435
ENSRNOG00000020753	Bnip1	ensembl	356.123	201.666	0.568438	0.000642678
ENSRNOG00000047746	AABR07000398.1	ensembl	342.532	504.916	1.4813	0.0006444
ENSRNOG00000042932	Ttc27	ensembl	760.37	497.135	0.656254	0.000645996
ENSRNOG00000004864	Prpf40a	ensembl	4787.4	3406.69	0.714795	0.000649087
ENSRNOG00000000438	Rnf5	ensembl_havana	164.537	262.385	1.60044	0.000651936
ENSRNOG00000017702	Gpld1	ensembl	1288.16	943.433	0.735853	0.000661624
ENSRNOG00000008891	Ift20	ensembl	1794.18	1158.7	0.648685	0.000674602
ENSRNOG00000039740	Cenpk	ensembl	57.9767	21.7074	0.379343	0.000681882
ENSRNOG00000011704	Fbxo34	ensembl	395.697	573.717	1.45829	0.000685346
ENSRNOG00000002579	Parm1	ensembl	1791.24	2502.56	1.40351	0.00069069
ENSRNOG00000004063	Sh3pxd2b	ensembl	34.166	81.5178	2.38349	0.000699023
ENSRNOG00000007687	Sema7a	ensembl	176.474	298.277	1.69587	0.000699282
ENSRNOG00000009512	Esd	ensembl	1196.26	746.002	0.625638	0.000700893
ENSRNOG00000006357	Sgip1	ensembl	509.941	825.244	1.62522	0.000706057
ENSRNOG00000012087	Ufsp2	ensembl	2126.65	1498.8	0.70874	0.000708723
ENSRNOG00000009340	Zbtb6	ensembl	277.708	467.016	1.68724	0.000709515
ENSRNOG00000055530	Panx2	ensembl	217.616	329.905	1.52261	0.00071301
ENSRNOG00000001223	Pttg1ip	ensembl	381.892	549.882	1.44429	0.000717608
ENSRNOG00000054514	Mkln1	ensembl	3067.84	2250.87	0.737342	0.000736045
ENSRNOG00000046829	Kdr	ensembl	273.48	416.514	1.53053	0.000783373
ENSRNOG00000033100	LOC689130	ensembl	2909.99	3908.84	1.34936	0.0007974
ENSRNOG00000001657	Cldnd1	ensembl	965.136	1372.77	1.42743	0.000808985
ENSRNOG00000000433	Prrt1	ensembl_havana	134.259	233.799	1.74433	0.000820957
ENSRNOG00000017500	Mtss1l	ensembl	809.432	1191.89	1.47799	0.000822421
ENSRNOG00000026116	Sall3	ensembl	54.0629	104.144	1.92609	0.000842834
ENSRNOG00000005052	Slc39a9	ensembl	736.546	1048.83	1.42946	0.000850263
ENSRNOG00000002045	Anxa3	ensembl	1118.03	752.99	0.676954	0.000870857
ENSRNOG00000020703	Sipa1l3	ensembl	124.852	220.159	1.76985	0.000880424
ENSRNOG00000049270	Ppp2r3b	ensembl	102.128	172.853	1.69708	0.000891011
ENSRNOG00000007916	Ptk2	ensembl	2066.85	1475.89	0.717316	0.000919359
ENSRNOG00000023781	Plec	ensembl	3162.99	4468.64	1.41882	0.000920026
ENSRNOG00000015420	Stxbp1	ensembl	6382.88	8763.28	1.37871	0.000923246
ENSRNOG00000053240	Soga1	ensembl	364.421	524.32	1.44464	0.000950728
ENSRNOG00000021139	Esrra	ensembl	81.8654	156.451	1.91296	0.000961839
ENSRNOG00000021318	Epas1	ensembl	1326.18	1851.92	1.40232	0.000983749
ENSRNOG00000025209	Plxnd1	ensembl	75.1591	148.428	1.97557	0.000988159
ENSRNOG00000014153	Lhfp	ensembl	722.587	1053.36	1.46265	0.000998858
ENSRNOG00000031203	Scfd1	ensembl	2039.63	1420.78	0.699807	0.00100471
ENSRNOG00000003964	Nsmce2	ensembl	332.909	206.044	0.622854	0.00100648
ENSRNOG00000020296	LOC103693430	ensembl	121.945	39.5558	0.326267	0.00100967
ENSRNOG00000004555	Sec14l3	ensembl	19076.4	8906.32	0.469096	0.00101274
ENSRNOG00000012940	Vps41	ensembl	6682.44	4768.3	0.71665	0.00103792
ENSRNOG00000043150	Arfgap1	ensembl	965.135	706.896	0.735374	0.00105365
ENSRNOG00000059043	Itch	ensembl	2330.71	1676.19	0.723036	0.0010587
ENSRNOG00000043128	Armcx4	ensembl	2458.62	3256.12	1.33092	0.00106894
ENSRNOG00000005353	Rybp	ensembl	446.177	627.498	1.41243	0.00109167
ENSRNOG00000004401	Mrpl13	ensembl	1430.7	1006.24	0.706676	0.00109204
ENSRNOG00000001104	Foxk1	ensembl	163.542	265.063	1.62751	0.00109237
ENSRNOG00000015026	Arhgef11	ensembl	983.311	1397.07	1.42562	0.001097
ENSRNOG00000010348	Cacna1f	ensembl	4.09354	18.5971	4.42023	0.00110614
ENSRNOG00000024149	Prr18	ensembl	6.21799	25.0018	3.88	0.00110911
ENSRNOG00000018987	Crebzf	ensembl	418.44	579.903	1.39138	0.00111615
ENSRNOG00000059453	Fuk	ensembl	72.5064	126.219	1.74157	0.00112209
ENSRNOG00000010302	Rasl10b	ensembl_havana	25.5076	58.5798	2.30706	0.00113069
ENSRNOG00000019023	Tars	ensembl	2009.86	1472.05	0.735958	0.00115925
ENSRNOG00000056946	Scaf1	ensembl	530.429	788.171	1.49011	0.00117936
ENSRNOG00000013451	Drosha	ensembl	1213.33	1653.94	1.36938	0.00120466
ENSRNOG00000060528	Cacna1g	ensembl	397.376	627.143	1.58103	0.00121417
ENSRNOG00000053881	Baz2a	ensembl	556.184	771.517	1.39292	0.00124131
ENSRNOG00000015590	Dnaaf1	ensembl	28.1137	68.5133	2.41816	0.00125061
ENSRNOG00000012333	Kbtbd11	ensembl	743.808	1003.52	1.35557	0.00125248
ENSRNOG00000007648	Rab11b	ensembl	1458.17	2002.46	1.37981	0.00127536
ENSRNOG00000021183	LOC102552640	ensembl	28.3085	58.0635	2.05839	0.00129141
ENSRNOG00000001915	Chodl	ensembl	324.568	202.772	0.629782	0.00131363
ENSRNOG00000027888	Cmss1	ensembl	161.237	89.5747	0.557242	0.00136448
ENSRNOG00000015551	Fuca2	ensembl	597.18	841.884	1.41555	0.00137937
ENSRNOG00000047106	Mtrf1	ensembl	1129.59	748.977	0.666091	0.00140049
ENSRNOG00000005697	Slc6a11	ensembl	2989.94	4042.14	1.3581	0.00143699
ENSRNOG00000060328	AABR07072262.1	ensembl	0.348226	30.8523	66.5033	0.00144095
ENSRNOG00000056746	Tchh	ensembl	142.178	234.423	1.65562	0.0014737
ENSRNOG00000001369	Oas1a	ensembl	30.6706	67.154	2.19281	0.00149097
ENSRNOG00000013218	Sap30	ensembl	135.198	75.1423	0.559241	0.00154401
ENSRNOG00000007256	Necab1	ensembl	1917.74	1398.65	0.732118	0.0015764
ENSRNOG00000036802	Snhg11	ensembl	2917.47	3811.05	1.31225	0.00158022
ENSRNOG00000006548	Mrc2	ensembl	114.491	182.715	1.60793	0.00160114
ENSRNOG00000060615	Rai1	ensembl	546.391	747.526	1.37284	0.00160478
ENSRNOG00000036894	Cisd3	ensembl	47.2912	86.8403	1.83744	0.00164211
ENSRNOG00000049556	AABR07071445.1	ensembl	1.04468	12.7066	11.1374	0.00165964
ENSRNOG00000027628	Elp5	ensembl	356.956	224.429	0.63142	0.00167629
ENSRNOG00000026212	Micall1	ensembl	335.838	479.681	1.4338	0.00167928
ENSRNOG00000047768	Lamb2	ensembl	288.192	450.25	1.56551	0.00168555
ENSRNOG00000011321	Rftn1	ensembl	807.281	587.722	0.731892	0.00170728
ENSRNOG00000025394	Tanc1	ensembl	296.879	450.523	1.52425	0.00172029
ENSRNOG00000036698	Nploc4	ensembl	692.555	1010.13	1.46318	0.00172502
ENSRNOG00000010174	Enpp4	ensembl	548.754	750.552	1.37505	0.00176295
ENSRNOG00000046905	Sgce	ensembl	866.034	552.622	0.641372	0.00179078
ENSRNOG00000018884	Ttc13	ensembl	206.16	306.957	1.49305	0.00185911
ENSRNOG00000021225	Oxt	ensembl	28121	37526.7	1.34097	0.00186324
ENSRNOG00000006559	Akap8	ensembl	1784.26	1269.89	0.715705	0.00186766
ENSRNOG00000059969	AABR07021762.1	ensembl	1.4643	13.4577	8.86937	0.00187639
ENSRNOG00000014565	Lcmt1	ensembl	964.774	648.966	0.674731	0.0018866
ENSRNOG00000033863	RGD1560470	ensembl	85.6473	157.616	1.8379	0.00189557
ENSRNOG00000008277	Bag1	ensembl	1566.92	937.075	0.600524	0.00190029
ENSRNOG00000012911	Erlin1	ensembl	211.372	329.365	1.56554	0.00191468
ENSRNOG00000033835	Dnm1	ensembl	4639.15	5992.07	1.29707	0.00198856
ENSRNOG00000037567	RGD1309730	ensembl	1423.96	927.486	0.655027	0.00200838
ENSRNOG00000029260	Pitpnm2	ensembl	391.192	585.423	1.49905	0.00201851
ENSRNOG00000028274	Myrf	ensembl	250.421	368.615	1.4771	0.00205336
ENSRNOG00000042467	Ttc4	ensembl	1381.56	1001.24	0.728456	0.00206816
ENSRNOG00000046794	Khdrbs1	ensembl	863.016	1208.82	1.40668	0.00207224
ENSRNOG00000061917	AABR07042840.1	ensembl	32.0595	67.424	2.09356	0.00207504
ENSRNOG00000011227	Atp1b2	ensembl	2160.01	3129.42	1.45526	0.00211318
ENSRNOG00000007034	Hipk2	ensembl	1184.81	1651.92	1.39956	0.00211439
ENSRNOG00000038916	Dram1	ensembl	13.6241	34.3265	2.5013	0.00212136
ENSRNOG00000036798	Dusp3	ensembl	2748.89	3542.48	1.29488	0.0021284
ENSRNOG00000014521	Armc8	ensembl	1558.22	1037.97	0.668826	0.00213636
ENSRNOG00000025527	Mtcl1	ensembl	478.829	672.215	1.40937	0.00214246
ENSRNOG00000047206	LOC100911727	ensembl	561.659	379.081	0.678908	0.00216024
ENSRNOG00000014875	Ash2l	ensembl	1895.53	1431.1	0.758141	0.00218747
ENSRNOG00000005762	Rab22a	ensembl	303.287	451.182	1.49697	0.00222385
ENSRNOG00000034200	Atp8a1	ensembl	3305.52	2526.23	0.767511	0.00226267
ENSRNOG00000028185	Tstd3	ensembl	1143.63	851.911	0.747856	0.00226518
ENSRNOG00000004695	Celf5	ensembl	551.878	780.764	1.41928	0.00227341
ENSRNOG00000042728	Fbrs	ensembl	44.8161	87.3152	1.94451	0.00229833
ENSRNOG00000022395	Tnrc6c	ensembl	430.563	598.992	1.39549	0.0023383
ENSRNOG00000047171	Rnf8	ensembl	1179.59	1543.87	1.31556	0.0023678
ENSRNOG00000033942	Grin2a	ensembl	303.051	438.484	1.4528	0.0023756
ENSRNOG00000029304	Aggf1	ensembl	847.763	587.089	0.695859	0.00237962
ENSRNOG00000060407	Cacna1i	ensembl_havana	309.105	433.47	1.40827	0.00239419
ENSRNOG00000009884	Lgals1	ensembl	561.032	392.833	0.704625	0.00239445
ENSRNOG00000038218	Ndufc1	ensembl	562.643	393.919	0.704119	0.00240929
ENSRNOG00000003536	Rufy1	ensembl	1021.17	704.242	0.692204	0.0024162
ENSRNOG00000001375	Gal3st4	ensembl	91.6463	153.096	1.67291	0.00242367
ENSRNOG00000024601	Taf11	ensembl	227.619	327.65	1.4453	0.00244549
ENSRNOG00000041744	AABR07065531.1	ensembl	347.338	505.18	1.45731	0.00245702
ENSRNOG00000018408	RGD1307554	ensembl	98.0172	172.743	1.76114	0.00245963
ENSRNOG00000002711	Nuf2	ensembl	49.1814	18.632	0.383191	0.00253555
ENSRNOG00000020317	RGD1307752	ensembl	482.947	319.132	0.664874	0.00254313
ENSRNOG00000028341	Alkbh5	ensembl	735.893	983.17	1.34083	0.00255597
ENSRNOG00000055525	Kmt2b	ensembl	211.008	305.043	1.45079	0.0025984
ENSRNOG00000032995	LOC364556	ensembl	808.426	511.878	0.637406	0.00260363
ENSRNOG00000061046	AABR07059632.3	ensembl	1226.95	1604.35	1.31391	0.00261653
ENSRNOG00000018327	Fank1	ensembl	27.922	62.9838	2.24297	0.00262116
ENSRNOG00000012594	Sugt1	ensembl	1317.32	919.583	0.701662	0.00262539
ENSRNOG00000020698	Rnd2	ensembl	1168.36	1596.4	1.37252	0.00262966
ENSRNOG00000001930	Ccdc50	ensembl	2211.88	1641.97	0.745429	0.00264951
ENSRNOG00000025430	Ddx18	ensembl	530.95	358.932	0.680129	0.00267397
ENSRNOG00000014520	Ing1	ensembl	405.14	552.251	1.36909	0.00267719
ENSRNOG00000043350	Cap2	ensembl	1405.13	1044.3	0.746376	0.00268505
ENSRNOG00000026248	Nmt2	ensembl	3384.26	2532.72	0.75191	0.00269083
ENSRNOG00000010286	Cast	ensembl	2144.67	1573.05	0.736474	0.00269659
ENSRNOG00000051669	AABR07040855.1	ensembl	249.638	161.276	0.649353	0.00271329
ENSRNOG00000060946	Cask	ensembl	1280.92	959.954	0.753235	0.00271535
ENSRNOG00000060410	Pcdh1	ensembl	520.93	729.161	1.40351	0.00272733
ENSRNOG00000031479	Hdlbp	ensembl	6306.99	8108.94	1.29137	0.00273743
ENSRNOG00000001854	Tmtc1	ensembl	657.283	956.601	1.45892	0.00274903
ENSRNOG00000012392	Dnajc2	ensembl	1803.17	1265.71	0.705479	0.00276482
ENSRNOG00000015218	Nsmce1	ensembl	235.917	125.593	0.536606	0.00276583
ENSRNOG00000017340	Wdr12	ensembl	1546.28	1093.43	0.710516	0.00277659
ENSRNOG00000020862	Ptpn23	ensembl	229.169	351.496	1.53719	0.00277717
ENSRNOG00000057398	SNORD19B	ensembl	6.74877	0	0.0181838	0.0028151
ENSRNOG00000005135	RGD1562161	ensembl	286.069	429.971	1.50796	0.00283147
ENSRNOG00000016611	Hras	ensembl	671.181	472.008	0.706757	0.00283727
ENSRNOG00000017405	Raly	ensembl	1023.77	1362.92	1.3372	0.00284051
ENSRNOG00000010957	Braf	ensembl	326.404	483.202	1.48271	0.00287858
ENSRNOG00000034233	Fyttd1	ensembl	1446.73	1089.55	0.756753	0.00289253
ENSRNOG00000051948	Hcfc1	ensembl	1097.95	1543.63	1.41116	0.00291088
ENSRNOG00000022845	Cep70	ensembl	1193.21	819.876	0.690584	0.00292595
ENSRNOG00000008174	Appl2	ensembl	652.373	921.812	1.41855	0.00293968
ENSRNOG00000020264	Dhrs1	ensembl	91.4168	144.065	1.58059	0.00296397
ENSRNOG00000046717	AC130253.1	ensembl	0.383926	8.69286	18.6849	0.00298362
ENSRNOG00000005996	Lhx6	ensembl	15.8334	2.16928	0.147034	0.00299412
ENSRNOG00000012315	Agmat	ensembl	3.00972	17.7296	5.6707	0.00300505
ENSRNOG00000051232	Gbe1	ensembl_havana	850.084	632.759	0.747136	0.00305931
ENSRNOG00000010560	Otp	ensembl	23.0146	55.7238	2.40027	0.00309269
ENSRNOG00000008841	Orc1	ensembl	42.511	81.2927	1.91054	0.00310831
ENSRNOG00000051483	Sepw1	ensembl	218.033	125.033	0.576488	0.00311305
ENSRNOG00000005290	Ywhae	ensembl	17587.6	22825.5	1.30404	0.00312615
ENSRNOG00000013140	Pdzd2	ensembl	157.031	248.187	1.58625	0.00314588
ENSRNOG00000006868	Ube2z	ensembl	404.294	566.158	1.40565	0.00320769
ENSRNOG00000028592	RGD1562451	ensembl	118.985	184.444	1.56146	0.00322533
ENSRNOG00000019575	Rell2	ensembl	23.5611	48.6047	2.07485	0.00325682
ENSRNOG00000004109	Zfpm2	ensembl	97.3865	162.354	1.66548	0.00327816
ENSRNOG00000003013	Rpgr	ensembl	472.682	325.366	0.691947	0.00327865
ENSRNOG00000002595	Dpp10	ensembl	1984.81	1496.12	0.757674	0.00330815
ENSRNOG00000013493	Psma4	ensembl	6364.12	4581.98	0.723834	0.00331094
ENSRNOG00000050206	Shank2	ensembl_havana	381.638	559.856	1.47088	0.00331922
ENSRNOG00000004723	Fcf1	ensembl	508.759	343.905	0.679251	0.00332525
ENSRNOG00000020167	Reep5	ensembl	4050.13	5224.16	1.29553	0.00335244
ENSRNOG00000020506	Khnyn	ensembl	239.464	354.856	1.48563	0.00336461
ENSRNOG00000008472	Rbm10	ensembl	1167.28	865.827	0.745514	0.0033815
ENSRNOG00000010668	Anxa6	ensembl	911.746	599.942	0.659962	0.00338229
ENSRNOG00000057340	Adam21	ensembl	1.38946	10.1275	6.83889	0.00342121
ENSRNOG00000021177	Cox8a	ensembl	550.827	830.85	1.51434	0.00342297
ENSRNOG00000012645	Mecom	ensembl	97.7929	158.209	1.62033	0.00343348
ENSRNOG00000020915	Setd2	ensembl	3505.47	4497.73	1.28894	0.00343938
ENSRNOG00000017800	Foxc1	ensembl	48.2886	89.9509	1.86701	0.00344857
ENSRNOG00000000805	Gja1	ensembl	7505.03	9755.97	1.30576	0.00347166
ENSRNOG00000010217	Prrc2b	ensembl	2303.34	3125.89	1.36225	0.00349582
ENSRNOG00000017290	Zfp335	ensembl	395.485	548.979	1.39164	0.0035035
ENSRNOG00000022402	Luzp1	ensembl	1906.04	2518.82	1.32729	0.00351705
ENSRNOG00000006197	Calu	ensembl	3093.84	2277.06	0.739704	0.00357278
ENSRNOG00000018881	Rnasek	ensembl	23.8902	59.6797	2.49159	0.00358269
ENSRNOG00000009245	Exosc2	ensembl	840.447	590.499	0.705087	0.00362179
ENSRNOG00000005623	Ankmy2	ensembl	2370.52	1792.99	0.759974	0.00367464
ENSRNOG00000030216	Abcg3l1	ensembl	117.78	67.6765	0.578593	0.00368089
ENSRNOG00000010209	Nol12	ensembl	38.1406	74.337	1.94565	0.00368147
ENSRNOG00000007831	Ufl1	ensembl	1550.01	1189.92	0.771101	0.0037075
ENSRNOG00000004752	Nalcn	ensembl	6097.11	4741.73	0.781348	0.00374491
ENSRNOG00000016063	LOC361635	ensembl	367.213	571.007	1.55732	0.00376958
ENSRNOG00000027049	Atp5j2	ensembl_havana	1786.48	1185.68	0.666175	0.00377864
ENSRNOG00000008859	Tank	ensembl	910.885	692.088	0.76354	0.00379379
ENSRNOG00000059389	SCARNA13	ensembl	10058	7494.15	0.749042	0.00380627
ENSRNOG00000007316	Idh3B	ensembl	3332.93	2531.71	0.763437	0.00382809
ENSRNOG00000052232	Cyb561d1	ensembl	21.0013	48.7544	2.3189	0.00383357
ENSRNOG00000020455	Cst6	ensembl	121.831	212.679	1.7464	0.00383898
ENSRNOG00000033734	Tnnt2	ensembl	36.9111	75.9419	2.05268	0.00385501
ENSRNOG00000052555	Hist2h2aa2	ensembl	34.3094	65.7496	1.92062	0.00386253
ENSRNOG00000005130	Ogdh	ensembl	2864.74	3721.89	1.30442	0.00386761
ENSRNOG00000010119	Zmat3	ensembl	110.091	170.538	1.55051	0.00389537
ENSRNOG00000023910	Man2b1	ensembl	326.719	225.682	0.693591	0.00390613
ENSRNOG00000060728	Tuba1a	ensembl	4885.04	6171.82	1.26934	0.00392221
ENSRNOG00000019456	Kars	ensembl	1371.54	920.558	0.673801	0.00392996
ENSRNOG00000007133	Plxnb2	ensembl	681.67	904.28	1.33125	0.00394532
ENSRNOG00000025634	Zfhx2	ensembl	186.361	278.037	1.49541	0.00394941
ENSRNOG00000056853	Psma7	ensembl	4093.74	2953.47	0.725057	0.00395905
ENSRNOG00000014060	Mras	ensembl	1191.11	1545.13	1.30315	0.00400831
ENSRNOG00000011987	Cd2ap	ensembl	595.689	870.969	1.46887	0.00401642
ENSRNOG00000003782	Acot9	ensembl	1202.95	873.501	0.729408	0.00402405
ENSRNOG00000011407	Pragmin	ensembl	83.8598	138.656	1.65641	0.00404759
ENSRNOG00000005413	Creb3l1	ensembl	42.2244	94.6293	2.25133	0.00406436
ENSRNOG00000042355	Tarbp2	ensembl	76.459	122.346	1.60411	0.00406918
ENSRNOG00000061121	Wdfy3	ensembl_havana	2432.62	3259.92	1.3452	0.00407331
ENSRNOG00000059660	AABR07065531.5	ensembl	393.115	587.091	1.49674	0.00409026
ENSRNOG00000003661	Hn1	ensembl	473.675	312.911	0.663969	0.00409482
ENSRNOG00000018415	Acot13	ensembl	890.597	658.864	0.743699	0.00414038
ENSRNOG00000050090	Slc6a17	ensembl_havana	2791.05	3554.02	1.27859	0.00414582
ENSRNOG00000057645	Micb	ensembl	26.9027	55.4332	2.04427	0.00415215
ENSRNOG00000022256	Cxcl10	ensembl	0	6.28445	51.9985	0.00423504
ENSRNOG00000012818	Ksr1	ensembl	92.7295	149.928	1.62275	0.00423811
ENSRNOG00000047898	Hist2h2aa3	ensembl	39.5801	76.0669	1.93283	0.00425134
ENSRNOG00000011498	Psip1	ensembl	13628.3	10271.8	0.757587	0.00426965
ENSRNOG00000036660	Fn3krp	ensembl	1311.78	994.411	0.761419	0.00428476
ENSRNOG00000015989	Mrpl32	ensembl	541.422	394.588	0.733017	0.00428876
ENSRNOG00000016486	Nop58	ensembl	4351.38	3143.76	0.726146	0.00433116
ENSRNOG00000004131	Pkn1	ensembl	242.367	347.434	1.43716	0.00436076
ENSRNOG00000032579	Zswim2	ensembl	18.8694	42.2523	2.24482	0.00436519
ENSRNOG00000021063	Grin2d	ensembl	109.28	171.033	1.57197	0.00439935
ENSRNOG00000050043	Olr1735	ensembl_havana	18.7429	4.21773	0.230074	0.00440372
ENSRNOG00000011414	Psmc3	ensembl	2169.92	2821.21	1.3058	0.00441607
ENSRNOG00000001828	Stk38l	ensembl	669.72	879.747	1.31904	0.00442654
ENSRNOG00000031097	Syce1l	ensembl	39.4455	80.5275	2.04803	0.00446441
ENSRNOG00000060332	7SK	ensembl	799.37	1416.54	1.78172	0.00449495
ENSRNOG00000005865	Ssfa2	ensembl	1080.36	1397.31	1.29856	0.00452816
ENSRNOG00000045775	Rnpepl1	ensembl	22.6601	48.5845	2.12791	0.0045373
ENSRNOG00000006209	Mbd6	ensembl	57.9808	111.475	1.9159	0.00454912
ENSRNOG00000006137	Arid1a	ensembl	1086.42	1469.89	1.35896	0.00457189
ENSRNOG00000019799	Pcdhgc3	ensembl	921.933	1205.32	1.3135	0.00458604
ENSRNOG00000004512	Apool	ensembl	139.994	82.2097	0.588196	0.00460211
ENSRNOG00000030930	Samsn1	ensembl	10.5614	30.0046	2.81644	0.00464042
ENSRNOG00000002722	Sec14l1	ensembl	855.122	1105.26	1.29886	0.00465184
ENSRNOG00000002592	Rps6ka6	ensembl	602.1	425.857	0.711039	0.00465306
ENSRNOG00000008802	Dnajc11	ensembl	1419.95	1076.52	0.761821	0.0046637
ENSRNOG00000062002	Kcna3	havana	596.311	803.437	1.35211	0.00466383
ENSRNOG00000039829	Rpp14	ensembl	665.277	490.928	0.741389	0.00466708
ENSRNOG00000021781	Camk1	ensembl	1881.54	1421.86	0.75911	0.00466978
ENSRNOG00000009137	Ubxn2b	ensembl	424.81	579.056	1.36895	0.00468006
ENSRNOG00000056221	Frmpd3	ensembl	76.9102	25.3263	0.331479	0.00468317
ENSRNOG00000013804	Exoc5	ensembl	3120.8	2339.35	0.752819	0.00470911
ENSRNOG00000017729	Psmg2	ensembl	166.83	107.78	0.650866	0.00471397
ENSRNOG00000014087	Kifc3	ensembl	391.514	540.642	1.38549	0.00474699
ENSRNOG00000054058	Osbpl1a	ensembl	4528.18	3453.51	0.766625	0.00477943
ENSRNOG00000037437	Golga3	ensembl	558.572	747.159	1.34381	0.0048263
ENSRNOG00000050899	AABR07054362.1	ensembl	85.8198	135.764	1.58457	0.00483243
ENSRNOG00000004181	Sdccag8	ensembl	1710.22	1241.3	0.729354	0.00485341
ENSRNOG00000025160	Tmem56	ensembl	689.144	382.271	0.557693	0.00490101
ENSRNOG00000059844	AABR07056515.1	ensembl	12.8822	2.56168	0.20688	0.00494328
ENSRNOG00000019439	Polr2g	ensembl	467.971	287.323	0.618736	0.00494696
ENSRNOG00000042741	Adgb	ensembl	152.9	229.476	1.50441	0.00495021
ENSRNOG00000002565	Taf1	ensembl_havana	3340.81	4234.27	1.27294	0.00500062
ENSRNOG00000002292	Hnrnpd	ensembl	1094.71	1464.65	1.34289	0.005012
ENSRNOG00000052289	Ptdss1	ensembl	2427.64	1889.61	0.781805	0.00501289
ENSRNOG00000049443	Vom2r77	ensembl	0	5.78927	47.6652	0.00501749
ENSRNOG00000014268	Abca2	ensembl	2941.13	3842.19	1.31218	0.00504611
ENSRNOG00000002205	Ociad1	ensembl	1497.41	2076.92	1.39258	0.00505922
ENSRNOG00000009350	Sez6	ensembl	764.38	1025.83	1.34665	0.00507357
ENSRNOG00000037998	Snw1	ensembl	751.934	551.467	0.736106	0.00511271
ENSRNOG00000002983	Nfix	ensembl	158.139	239.899	1.52039	0.00522914
ENSRNOG00000047796	Pcbd2	ensembl	154.247	54.5973	0.353858	0.00524786
ENSRNOG00000016578	Mtpap	ensembl	231.569	326.376	1.41418	0.00527995
ENSRNOG00000001172	Rnf10	ensembl	629.177	857.935	1.36834	0.00528918
ENSRNOG00000019087	Fam174a	ensembl	472.231	341.216	0.727137	0.00529767
ENSRNOG00000020658	Aarsd1	ensembl	790.841	559.594	0.710715	0.00530122
ENSRNOG00000020421	Fndc7	ensembl	30.9715	65.2376	2.10367	0.0053315
ENSRNOG00000012405	Tcf4	ensembl	912.812	1240.43	1.3656	0.00535409
ENSRNOG00000055753	SNORD116	ensembl	84.3035	134.026	1.58938	0.00537753
ENSRNOG00000020475	Sart1	ensembl	1389.54	985.218	0.711909	0.00539901
ENSRNOG00000020456	Nucb2	ensembl	2810.58	2064.86	0.73864	0.00541518
ENSRNOG00000001091	Hip1r	ensembl	525.604	704.718	1.34517	0.00546391
ENSRNOG00000054414	AABR07043276.1	ensembl	0	5.43067	44.8508	0.00554942
ENSRNOG00000003948	Llgl1	ensembl	133.529	222.857	1.67086	0.00555353
ENSRNOG00000009491	Phc3	ensembl	756.886	1023.17	1.35727	0.00560501
ENSRNOG00000016012	Spats2l	ensembl	1317.6	987.726	0.753109	0.00562149
ENSRNOG00000002662	Pbdc1	ensembl	1319.61	985.057	0.750158	0.00564526
ENSRNOG00000008354	Slc9a8	ensembl	376.354	265.641	0.708181	0.00564835
ENSRNOG00000052687	Megf8	ensembl	1480.99	1879.03	1.27409	0.00565987
ENSRNOG00000033522	Prdm2	ensembl	1164.78	1549.94	1.33595	0.00567345
ENSRNOG00000009266	Anp32b	ensembl	435.507	606.739	1.4016	0.00568185
ENSRNOG00000018289	Park7	ensembl	2266.18	1311.8	0.580909	0.005685
ENSRNOG00000023870	Sh2d7	ensembl	1.00554	8.77823	7.79872	0.0057059
ENSRNOG00000036641	LOC689065	ensembl	7.56204	22.9675	3.00118	0.00573983
ENSRNOG00000005358	Pmm1	ensembl	1415.75	1040.43	0.738198	0.00574186
ENSRNOG00000007946	Bcl2l1	ensembl	647.56	874.882	1.35523	0.00577618
ENSRNOG00000026293	Jun	ensembl	634.113	840.354	1.33207	0.00577671
ENSRNOG00000056617	Zswim8	ensembl	213.153	315.291	1.48362	0.00579117
ENSRNOG00000014935	Peo1	ensembl	621.606	808.967	1.30802	0.00579825
ENSRNOG00000001773	Senp2	ensembl	841.733	572.427	0.68232	0.00582751
ENSRNOG00000048758	Snrpd2l	ensembl	206.899	106.635	0.518953	0.00584092
ENSRNOG00000000536	Mdga1	ensembl	82.708	134.012	1.62389	0.00584919
ENSRNOG00000008837	Ass1	ensembl	825.869	615.442	0.748434	0.00585489
ENSRNOG00000020410	Th	ensembl	588.43	421.201	0.718213	0.00586489
ENSRNOG00000061299	LOC100134871	ensembl	102.365	55.251	0.545482	0.00587721
ENSRNOG00000010891	Lrrcc1	ensembl	955.475	723.765	0.761471	0.00588731
ENSRNOG00000006063	Phf21a	ensembl	3765.85	2933.48	0.782333	0.0058892
ENSRNOG00000002178	Mrps18c	ensembl	752.847	300.717	0.401472	0.00592255
ENSRNOG00000024733	Mnd1	ensembl	47.7487	19.3979	0.407484	0.00593751
ENSRNOG00000055694	AC096263.1	ensembl	287.775	148.121	0.518161	0.00598034
ENSRNOG00000013110	Nudt2	ensembl	1399.24	1018.15	0.731701	0.00599129
ENSRNOG00000000466	Hsd17b8	ensembl_havana	153.302	84.9118	0.554607	0.00599951
ENSRNOG00000054125	AABR07051592.2	ensembl	1.3929	32.7652	21.948	0.00604059
ENSRNOG00000008039	Cul5	ensembl	5476.2	4252.29	0.779818	0.00604849
ENSRNOG00000004152	Lrp12	ensembl	763.042	980.535	1.29128	0.00605416
ENSRNOG00000045846	Rfx2	ensembl	40.7385	84.4496	2.06018	0.00606907
ENSRNOG00000012638	Ciao1	ensembl	1075.56	819.803	0.765356	0.0060828
ENSRNOG00000060355	Hist1h1b	ensembl	58.6766	30.2277	0.519764	0.00612214
ENSRNOG00000024349	Cbarp	ensembl	726.784	1007.28	1.39068	0.00612651
ENSRNOG00000000316	Sobp	ensembl	283.769	391.284	1.38534	0.00614475
ENSRNOG00000018410	Nfu1	ensembl	416.841	295.882	0.712325	0.00614713
ENSRNOG00000003054	Cask	ensembl	323.85	201.351	0.625353	0.00616678
ENSRNOG00000003717	Cnih4	ensembl	559.877	387.415	0.694801	0.00621121
ENSRNOG00000019840	Mdp1	ensembl	370.958	243.291	0.657668	0.00622998
ENSRNOG00000018453	Nop2	ensembl	124.433	208.587	1.68261	0.006233
ENSRNOG00000006870	Mtdh	ensembl	2310.69	1694.68	0.736884	0.00627134
ENSRNOG00000028997	RGD1561671	ensembl	17.587	37.8088	2.14681	0.00628264
ENSRNOG00000013940	Rn50_2_1476.1	ensembl_havana	0.966394	8.88079	7.94257	0.00628475
ENSRNOG00000019713	Wdr24	ensembl	421.508	296.457	0.708194	0.00632669
ENSRNOG00000054212	Pde1a	ensembl	1766.6	1268.66	0.72168	0.00632693
ENSRNOG00000052407	Btk	ensembl	32.1483	11.9535	0.375521	0.00634974
ENSRNOG00000031656	Ccnh	ensembl	1301.28	968.708	0.747435	0.00638018
ENSRNOG00000000595	Traf3ip2	ensembl	28.8155	57.8771	2.00015	0.00639086
ENSRNOG00000025815	Cdr2l	ensembl	300.321	406.668	1.3606	0.00639123
ENSRNOG00000008034	Tmeff1	ensembl	4432.23	3393.85	0.769612	0.00641293
ENSRNOG00000014633	Vps28	ensembl	1046.47	694.221	0.665945	0.00641856
ENSRNOG00000001455	Kif13a	ensembl	728.004	989.613	1.36404	0.0064356
ENSRNOG00000009990	Zranb2	ensembl	11645.6	8882.54	0.766481	0.00647229
ENSRNOG00000007249	Cdkn1b	ensembl	486.741	650.535	1.34098	0.00647581
ENSRNOG00000046790	Irs4	havana	609.043	805.829	1.32731	0.00648421
ENSRNOG00000006077	Snx5	ensembl	2347.65	1755.29	0.750454	0.00650889
ENSRNOG00000011475	Srcin1	ensembl	275.472	397.879	1.44771	0.00653079
ENSRNOG00000005332	Csdc2	ensembl	598.991	811.987	1.35962	0.00654023
ENSRNOG00000057815	RGD1566314	ensembl	696.961	501.196	0.722864	0.00655571
ENSRNOG00000003829	Ap3s1	ensembl	1282.15	970.634	0.76106	0.00655912
ENSRNOG00000047620	Golph3l	ensembl	1095.99	808.22	0.741414	0.0065752
ENSRNOG00000018456	LOC100911664	ensembl	951.075	1249.99	1.31913	0.00662455
ENSRNOG00000002301	Uso1	ensembl	1746.17	2389.43	1.37427	0.00668285
ENSRNOG00000018904	Dtymk	ensembl	1393.87	874.455	0.630978	0.00670365
ENSRNOG00000049456	Slc35f3	ensembl	74.5666	135.942	1.82053	0.00672366
ENSRNOG00000000487	Grm4	ensembl	81.0736	47.5952	0.591408	0.00675753
ENSRNOG00000007692	Ift52	ensembl	862.273	1133.8	1.322	0.00676544
ENSRNOG00000001351	Trafd1	ensembl	576.579	765.578	1.33213	0.00677478
ENSRNOG00000000812	RGD1302996	ensembl_havana	86.229	138.499	1.61293	0.006828
ENSRNOG00000010034	Asah1	ensembl	2944.8	2319.1	0.791233	0.00683502
ENSRNOG00000006237	Gpr37l1	ensembl	2161.87	1696.45	0.788085	0.00686403
ENSRNOG00000001746	Ncbp2	ensembl	1008.91	761.476	0.758019	0.00686432
ENSRNOG00000028659	Szt2	ensembl	187.174	271.587	1.4529	0.006876
ENSRNOG00000002139	RGD1311575	ensembl	2791.24	3542.39	1.27484	0.00689508
ENSRNOG00000042322	Pcdhga4	ensembl	98.029	154.373	1.58113	0.00690976
ENSRNOG00000021156	Vegfb	ensembl	327.492	437.426	1.34093	0.00691174
ENSRNOG00000008423	Gpr22	ensembl	1173.66	906.418	0.776089	0.00691559
ENSRNOG00000025235	Tmem130	ensembl_havana	23284	29481.8	1.27196	0.00691597
ENSRNOG00000014000	Kif2a	ensembl	324.462	439.396	1.35934	0.00697896
ENSRNOG00000021891	Zdhhc8	ensembl	124.411	187.119	1.50504	0.00702836
ENSRNOG00000017647	Zc3h8	ensembl	613.943	423.551	0.694361	0.00704953
ENSRNOG00000038184	Camk2n2	ensembl	31.7447	65.5774	2.07605	0.00706317
ENSRNOG00000006509	Srgap3	ensembl	675.491	927.64	1.38081	0.00706678
ENSRNOG00000019129	Fcgbp	ensembl	130.922	200.004	1.53047	0.00710762
ENSRNOG00000038761	Hacd2	ensembl	472.973	334.727	0.711603	0.00713385
ENSRNOG00000005981	Nt5c3a	ensembl	1096.6	821.842	0.753598	0.00714509
ENSRNOG00000024629	Hadha	ensembl	4460.48	3516.27	0.79219	0.00717501
ENSRNOG00000011346	Ehd2	ensembl	63.2054	106.222	1.67657	0.00719264
ENSRNOG00000000483	Syngap1	ensembl_havana	366.811	504.784	1.38275	0.00719367
ENSRNOG00000009421	Ivd	ensembl	799.361	602.161	0.756968	0.00721281
ENSRNOG00000008049	Max	ensembl	521.029	695.031	1.33884	0.00722772
ENSRNOG00000002989	Nmt1	ensembl	2570.64	1934.55	0.756617	0.00723665
ENSRNOG00000018911	Pfkfb3	ensembl	626.313	823.709	1.31949	0.00726295
ENSRNOG00000054912	U6	ensembl	36.5716	13.7467	0.380489	0.00730039
ENSRNOG00000033402	LOC501110	ensembl	464.171	328.339	0.709067	0.00738393
ENSRNOG00000008607	U2surp	ensembl	3477.39	2691.7	0.777175	0.007386
ENSRNOG00000060153	Spry3	ensembl	53.4159	92.3601	1.7318	0.00738973
ENSRNOG00000013190	Rnaset2	ensembl	208.142	125.116	0.602622	0.00741105
ENSRNOG00000001130	Nos1	ensembl	825.242	1147.43	1.39687	0.00741132
ENSRNOG00000042025	Lrrc37a	ensembl	4.58457	18.0864	3.92617	0.00749067
ENSRNOG00000058697	LOC103690319	ensembl	3.55305	15.7106	4.17609	0.00749886
ENSRNOG00000020763	Snrnp70	ensembl	3074.3	4068.98	1.32955	0.00750701
ENSRNOG00000005386	Kitlg	ensembl	476.228	675.691	1.42458	0.0075213
ENSRNOG00000005907	Rad18	ensembl	244.052	159.555	0.6581	0.00755491
ENSRNOG00000006539	Pex16	ensembl	193.853	125.814	0.651619	0.0075561
ENSRNOG00000009805	Wasf2	ensembl	136.765	201.976	1.4839	0.0075836
ENSRNOG00000011849	Ndufs1	ensembl	6577.74	5148.74	0.786689	0.00760873
ENSRNOG00000020452	Nsmce4a	ensembl	1802.15	1344.84	0.750134	0.00762575
ENSRNOG00000012410	S100a1	ensembl	367.788	245.374	0.670775	0.00770092
ENSRNOG00000049920	Psma2	ensembl	3618.03	2737.42	0.760021	0.00770263
ENSRNOG00000020615	Nap1l4	ensembl	5487.89	4245.94	0.777425	0.00771555
ENSRNOG00000001389	Irs3	ensembl	17.138	5.15716	0.302863	0.00773639
ENSRNOG00000007739	Rars	ensembl	1170.83	840.934	0.722243	0.00782285
ENSRNOG00000002969	Itpkb	ensembl	329.565	473.314	1.44012	0.00785394
ENSRNOG00000046109	LOC689574	ensembl	104.053	157.816	1.52041	0.00786485
ENSRNOG00000007294	Sntg1	ensembl	417.727	302.096	0.725981	0.00788562
ENSRNOG00000052466	AABR07043106.1	ensembl	9.63824	0.93943	0.110988	0.00791039
ENSRNOG00000006542	Atp6v0c	ensembl	1656.88	2146.8	1.30106	0.00793466
ENSRNOG00000060406	AABR07017159.1	ensembl	8.18304	27.4113	3.27523	0.00793638
ENSRNOG00000005446	Gna11	ensembl	628.711	807.525	1.29016	0.00798032
ENSRNOG00000014645	Aldh7a1	ensembl	478.765	341.235	0.714723	0.00798292
ENSRNOG00000015128	Sae1	ensembl	1948.75	1470.19	0.757042	0.00798428
ENSRNOG00000008921	Dynll2	ensembl	7939.72	9891.4	1.25137	0.0079854
ENSRNOG00000037793	Cdk5r2	ensembl	289.229	415.098	1.44053	0.00806299
ENSRNOG00000053935	AC123500.1	ensembl	2.27757	12.9774	5.29317	0.00806401
ENSRNOG00000052296	Shank3	ensembl_havana	288.454	403.385	1.4028	0.00810214
ENSRNOG00000014969	Lzts2	ensembl	174.946	271.204	1.55402	0.00810297
ENSRNOG00000020427	Borcs8	ensembl	156.676	96.35	0.616822	0.00814213
ENSRNOG00000000559	Npffr1	ensembl	25.0028	52.3893	2.08854	0.00814334
ENSRNOG00000012420	Bcl9l	ensembl	169.35	252.74	1.49522	0.00814782
ENSRNOG00000005108	Wfs1	ensembl_havana	167.466	256.364	1.53513	0.00815231
ENSRNOG00000008765	Zfhx4	ensembl	1129.43	1463.1	1.3004	0.00815337
ENSRNOG00000008305	Sc5d	ensembl	3080.25	3930.12	1.28138	0.00818643
ENSRNOG00000005123	Emc2	ensembl	3020.54	2046.55	0.680761	0.00819957
ENSRNOG00000004860	Myh9l1	ensembl	1041.4	799.199	0.771517	0.00821287
ENSRNOG00000017489	Gse1	ensembl	208.157	298.435	1.43611	0.00825712
ENSRNOG00000002413	Gpc4	ensembl	122.305	186.579	1.52766	0.00829223
ENSRNOG00000002645	Gemin5	ensembl	357.07	480.43	1.35042	0.00829837
ENSRNOG00000033893	Cacna1h	ensembl	153.147	226.877	1.48434	0.00830541
ENSRNOG00000042855	Ahdc1	ensembl	465.348	634.295	1.3672	0.00830576
ENSRNOG00000016256	Myo9b	ensembl	462.494	607.307	1.31867	0.00834784
ENSRNOG00000019047	Ola1	ensembl	4752.53	3723.64	0.787351	0.00835154
ENSRNOG00000003268	Maml1	ensembl	95.5172	143.469	1.50794	0.00848252
ENSRNOG00000048843	Tsfm	ensembl	157.981	104.358	0.662547	0.00860469
ENSRNOG00000009590	Stox2	ensembl	1104.08	1422.99	1.29465	0.00865614
ENSRNOG00000008225	AABR07064349.1	ensembl	66.4621	18.3415	0.276896	0.00871067
ENSRNOG00000022249	Mllt10	ensembl	818.527	622.402	0.763518	0.00871469
ENSRNOG00000023021	Msl2	ensembl	425.144	569.093	1.34395	0.00872791
ENSRNOG00000015948	Slc1a5	ensembl	23.4217	46.4878	1.99312	0.00873121
ENSRNOG00000015799	Cml1	ensembl	59.9702	31.5415	0.52881	0.00875872
ENSRNOG00000047651	Shank2	ensembl	78.7287	137.856	1.75049	0.00879491
ENSRNOG00000018997	Myh7b	ensembl	53.5841	92.0603	1.71626	0.0088055
ENSRNOG00000027374	Cfap46	ensembl	139.186	199.212	1.43748	0.00880593
ENSRNOG00000005769	Smg8	ensembl	158.141	233.674	1.47846	0.00882253
ENSRNOG00000027152	N4bp2	ensembl	334.29	455.484	1.36842	0.00882477
ENSRNOG00000059151	U6	ensembl	1.6237	11.065	6.18524	0.0088348
ENSRNOG00000019175	Ercc6l2	ensembl	1153.3	890.775	0.776573	0.00883864
ENSRNOG00000007971	Wbp2	ensembl	310.161	458.178	1.47944	0.00885087
ENSRNOG00000010794	Dennd3	ensembl	237.467	333.214	1.40601	0.00894333
ENSRNOG00000018059	Ihh	ensembl	0	6.31746	51.7761	0.00894689
ENSRNOG00000002232	Aff1	ensembl	65.9981	108.239	1.63865	0.00906657
ENSRNOG00000020363	Med25	ensembl	90.4197	139.525	1.54604	0.00910041
ENSRNOG00000019689	Vwf	ensembl	308.478	470.514	1.53136	0.00910813
ENSRNOG00000054315	SNORD27	ensembl	21.6154	43.3082	1.98863	0.00912317
ENSRNOG00000007671	Smu1	ensembl	2560.99	1988.25	0.779964	0.00912368
ENSRNOG00000018783	Bcas2	ensembl	1678.82	1173.19	0.701648	0.00916151
ENSRNOG00000017723	Cept1	ensembl	1777.06	1374.11	0.776663	0.00920216
ENSRNOG00000010365	Syn1	ensembl	1381.49	1802.73	1.31025	0.00921642
ENSRNOG00000010060	Panx1	ensembl	171.895	245.199	1.42841	0.00930023
ENSRNOG00000058288	Tcf19	havana	26.1909	9.66502	0.372746	0.00933822
ENSRNOG00000003581	Pou2f1	ensembl	268.689	373.17	1.39553	0.0093438
ENSRNOG00000002104	Scaf4	ensembl	404.708	547.694	1.35899	0.00942341
ENSRNOG00000019900	Slc35b2	ensembl	70.0519	116.712	1.67695	0.00942485
ENSRNOG00000014142	Ogfrl1	ensembl	986.396	762.841	0.776435	0.00944869
ENSRNOG00000052429	Stard3nl	ensembl	800.849	621.659	0.779767	0.00946229
ENSRNOG00000033736	Diras3	ensembl	0.618168	8.53744	10.9372	0.00949322
ENSRNOG00000004107	Rpl23	ensembl	7394.01	5430.53	0.738473	0.00949631
ENSRNOG00000010872	Ckb	ensembl	5997.54	7630.38	1.2783	0.00950165
ENSRNOG00000055344	Trnau1ap	ensembl	407.767	288.217	0.710962	0.00952114
ENSRNOG00000052499	Rab27a	ensembl	160.043	229.864	1.44151	0.00958586
ENSRNOG00000058094	Lyst	ensembl	1078.28	1434.01	1.33522	0.00958752
ENSRNOG00000024372	Cwf19l2	ensembl	3899.1	3038.37	0.783256	0.00960291
ENSRNOG00000004843	Pole3	ensembl	1319.8	954.906	0.727775	0.00960471
ENSRNOG00000001113	Mmd2	ensembl	3259.33	2477.89	0.764304	0.00961536
ENSRNOG00000020263	Atp1a3	ensembl	9338.43	11752.9	1.264	0.00961695
ENSRNOG00000049689	Smim18	ensembl	106.869	60.3516	0.570073	0.00964516
ENSRNOG00000048342	Tbca	ensembl	1965.43	1410.53	0.721339	0.00967332
ENSRNOG00000016686	Tmem167a	ensembl	188.98	119.042	0.632551	0.00974092
ENSRNOG00000014806	Pnkd	ensembl_havana	615.774	795.666	1.29717	0.00975606
ENSRNOG00000008053	Atp8a2	ensembl	461.869	630.92	1.37158	0.00984903
ENSRNOG00000003736	Col5a2	ensembl	380.6	258.99	0.683838	0.00991451
ENSRNOG00000050771	AABR07026300.1	ensembl	75.3072	115.683	1.53746	0.00994568
ENSRNOG00000058478	Mapk8ip1	ensembl	2611.6	3272.39	1.25847	0.00995864
ENSRNOG00000013443	Tm9sf3	ensembl	3662.92	2873.03	0.788125	0.00996313
ENSRNOG00000018372	Cul9	ensembl	617.037	874.216	1.42115	0.00996458
ENSRNOG00000032828	Mapk8ip2	ensembl	3113.36	3835.62	1.23765	0.0100053
ENSRNOG00000038297	Plekhd1	ensembl	114.425	168.457	1.47526	0.010027
ENSRNOG00000020310	Grik5	ensembl	276.521	382.976	1.38945	0.0100464
ENSRNOG00000028100	Pex11g	ensembl	15.0987	37.4374	2.48154	0.0100968
ENSRNOG00000000095	Gpr89b	ensembl	669.648	477.855	0.716172	0.010141
ENSRNOG00000012576	Vimp	ensembl	735.281	497.803	0.6802	0.0101422
ENSRNOG00000048586	AABR07040918.1	ensembl	0	6.21605	50.9712	0.0101704
ENSRNOG00000007142	B3gat1	ensembl	675.233	868.772	1.29131	0.0101888
ENSRNOG00000018642	Leng8	ensembl	792.988	1019.37	1.28992	0.0102288
ENSRNOG00000008425	Nav1	ensembl	424.657	583.273	1.38047	0.0103011
ENSRNOG00000050233	Cchcr1	ensembl_havana	171.066	266.856	1.56459	0.0103031
ENSRNOG00000060793	Eif2s3	ensembl_havana	3466.1	2725.95	0.790292	0.0103034
ENSRNOG00000048929	Stk19	havana	11.6907	30.9645	2.61797	0.0103084
ENSRNOG00000019968	Trim8	ensembl	1164.88	1499.25	1.29349	0.0103232
ENSRNOG00000052770	U6	ensembl	1.23634	10.6726	7.47578	0.010334
ENSRNOG00000057165	Igkv7-33	ensembl	12.8844	0	0.00956316	0.0103538
ENSRNOG00000026589	Dpy19l1	ensembl	2225.76	1770.6	0.798887	0.0103563
ENSRNOG00000027722	H1fx	ensembl	31.7579	57.9441	1.82495	0.0103572
ENSRNOG00000033316	Foxo4	ensembl_havana	228.62	313.144	1.37642	0.0103611
ENSRNOG00000001436	Ywhag	ensembl	20600.3	25473.8	1.242	0.0103884
ENSRNOG00000009079	Prkar2b	ensembl	1874.26	1490.61	0.798965	0.0103975
ENSRNOG00000039297	Mrpl52	ensembl	522.019	353.206	0.678835	0.0103993
ENSRNOG00000008125	Igbp1b	ensembl	28.5042	10.7427	0.382436	0.0104228
ENSRNOG00000050532	rno-mir-6319-1	ensembl	0.309084	6.0794	13.4673	0.0104457
ENSRNOG00000007920	Ssbp3	ensembl	398.354	295.818	0.746184	0.0105342
ENSRNOG00000023529	Rpl5	ensembl	6647.35	5286.3	0.799245	0.0105815
ENSRNOG00000008199	Odf3l2	ensembl	0.309084	6.14758	13.5944	0.010635
ENSRNOG00000036684	Pcyt2	ensembl	422.648	288.419	0.684579	0.0106361
ENSRNOG00000013213	Epha4	ensembl	2862.95	2267.44	0.795907	0.0106594
ENSRNOG00000020813	Ltbp3	ensembl	211.467	339.05	1.60443	0.0106637
ENSRNOG00000031579	LOC100363469	ensembl	7666.24	5690.25	0.74618	0.0106822
ENSRNOG00000009057	Sec62	ensembl	11374.7	8512.19	0.752236	0.0107575
ENSRNOG00000017720	Mxd1	ensembl	524.38	679.261	1.29914	0.0108152
ENSRNOG00000001982	Cblb	ensembl	269.664	383.837	1.4286	0.0108426
ENSRNOG00000004753	Napb	ensembl	3617.25	2762.02	0.767233	0.0108509
ENSRNOG00000014187	Igf1r	ensembl	297.471	406.406	1.37067	0.0108764
ENSRNOG00000001479	Gtf2i	ensembl	1772.95	2283.1	1.29272	0.0108991
ENSRNOG00000014665	Dhdds	ensembl	539.637	686.414	1.27704	0.0109569
ENSRNOG00000002093	Tgfbr3	ensembl	313.448	412.153	1.31986	0.010966
ENSRNOG00000011914	Dtnb	ensembl	925.777	686.933	0.745596	0.0110105
ENSRNOG00000012357	Unc45a	ensembl	320.801	435.077	1.36118	0.0110184
ENSRNOG00000027787	Cdc6	ensembl	1.38602	11.049	7.42092	0.011021
ENSRNOG00000026215	Tp53tg5	ensembl	8.23845	25.7386	3.16796	0.01103
ENSRNOG00000057421	AABR07065699.2	ensembl	0.696452	22.1057	27.4658	0.0110434
ENSRNOG00000006871	Slc25a14	ensembl	1235.42	945.877	0.769932	0.0111032
ENSRNOG00000006328	Wwp1	ensembl	1239.11	955.894	0.774553	0.0111215
ENSRNOG00000003070	Pigl	ensembl	107.541	64.6398	0.602578	0.0111289
ENSRNOG00000009850	St3gal4	ensembl	1006.87	619.265	0.618773	0.0111377
ENSRNOG00000032446	Recql4	ensembl	36.2165	14.8394	0.413162	0.011173
ENSRNOG00000036267	Mir341	ensembl	18.6208	44.2165	2.36764	0.0111733
ENSRNOG00000012100	Ssbp1	ensembl	943.658	682.618	0.727721	0.0112592
ENSRNOG00000013720	Aebp1	ensembl	25.579	54.7228	2.15474	0.0112947
ENSRNOG00000013255	Dnajc8	ensembl	3785.52	2705.52	0.718244	0.0113578
ENSRNOG00000035557	Mir410	ensembl	50.7678	19.5698	0.386402	0.0113796
ENSRNOG00000012323	Cherp	ensembl	149.006	233.411	1.56747	0.0113877
ENSRNOG00000014765	Vapa	ensembl	2820.92	2257.3	0.803941	0.0114052
ENSRNOG00000007271	Map3k9	ensembl	334.306	468.465	1.4052	0.0114134
ENSRNOG00000017012	Coq7	ensembl_havana	388.899	282.361	0.730101	0.0114165
ENSRNOG00000046484	Ccdc160	ensembl	312.777	212.177	0.683735	0.0114441
ENSRNOG00000016182	Tgfa	ensembl	137.041	200.99	1.46826	0.0114674
ENSRNOG00000046472	Arfgap3	ensembl	708.091	520.118	0.739118	0.0114731
ENSRNOG00000001884	Ranbp1	ensembl	1531.86	1192.18	0.782402	0.011475
ENSRNOG00000015003	Pex11a	ensembl	63.5467	107.708	1.69741	0.0114764
ENSRNOG00000001700	Dfnb31	ensembl	273.084	396.952	1.4586	0.011556
ENSRNOG00000050908	AABR07051266.1	ensembl	5.48584	0	0.0218584	0.0115686
ENSRNOG00000019848	LOC100910882	ensembl	5717.09	4251.9	0.747456	0.0116026
ENSRNOG00000002835	Luc7l3	ensembl	13905	10254.7	0.741457	0.0116184
ENSRNOG00000001409	Gnb2	ensembl	464.906	633.899	1.3664	0.0116275
ENSRNOG00000037206	Ccdc77	ensembl	812.876	631.284	0.780879	0.011631
ENSRNOG00000028238	Sh3bgr	ensembl	83.5523	46.1068	0.552102	0.0116859
ENSRNOG00000007982	Slc9a1	ensembl	402.562	552.882	1.37768	0.011753
ENSRNOG00000017258	Ica1l	ensembl	210.129	141.681	0.67921	0.0118028
ENSRNOG00000051051	Fam122a	havana	96.3377	147.489	1.54253	0.0118101
ENSRNOG00000060636	AABR07047044.2	ensembl	5.97747	17.9991	3.00534	0.0118179
ENSRNOG00000000581	Cdc40	ensembl	366.827	477.628	1.309	0.0118253
ENSRNOG00000025416	Dpy19l4	ensembl	1009.59	790.38	0.785773	0.0118331
ENSRNOG00000034126	Pcdhga2	ensembl	179.131	247.734	1.39038	0.0118361
ENSRNOG00000006652	Ddx1	ensembl	8331.96	5997.18	0.722768	0.0118374
ENSRNOG00000033970	Moap1	ensembl	163.432	301.015	1.84994	0.0118377
ENSRNOG00000018564	Nup93	ensembl	484.546	350.118	0.727389	0.0119043
ENSRNOG00000028822	Ngfrap1	ensembl	4595.85	3532.27	0.772432	0.011935
ENSRNOG00000004893	Atp5s	ensembl	408.611	301.779	0.742646	0.0119356
ENSRNOG00000036659	Fn3k	ensembl	461.792	332.747	0.724392	0.0119721
ENSRNOG00000007699	Golga5	ensembl	1878.49	1474.21	0.788749	0.0119978
ENSRNOG00000028556	Usp30	ensembl	587.189	435.608	0.745343	0.0119979
ENSRNOG00000012140	Cep89	ensembl	143.404	202.385	1.41425	0.0120477
ENSRNOG00000051944	U6	ensembl	0	4.90055	40.4459	0.0121113
ENSRNOG00000054695	Calcrl	ensembl	1324.42	1044.58	0.792642	0.0121129
ENSRNOG00000013194	Rps6ka2	ensembl	415.095	573.638	1.38938	0.0121321
ENSRNOG00000024779	Polr2b	ensembl	3246.1	2440.72	0.755787	0.0121466
ENSRNOG00000017516	Bcl9	ensembl	311.191	436.545	1.40792	0.012213
ENSRNOG00000001276	Pcnt	ensembl	856.208	1097.26	1.28828	0.0123012
ENSRNOG00000021289	Rbbp5	ensembl	3276.57	2532.07	0.776235	0.0123382
ENSRNOG00000031628	AABR07006688.2	ensembl	39.2582	75.6044	1.92682	0.0123705
ENSRNOG00000007879	Stk26	ensembl	297.17	206.645	0.699923	0.0123973
ENSRNOG00000011015	Hivep2	ensembl_havana	1212.11	1562.97	1.29467	0.0123979
ENSRNOG00000053583	Mapk3	ensembl	479.365	325.255	0.681848	0.0124132
ENSRNOG00000009068	Phlda3	ensembl	192.97	272.568	1.42013	0.0124317
ENSRNOG00000004089	Enpp2	ensembl	2268.11	1798.75	0.796723	0.012451
ENSRNOG00000012500	Ddx10	ensembl	2127.45	1592.52	0.752361	0.0125107
ENSRNOG00000016013	Gprc5b	ensembl	1635.76	2067.38	1.26889	0.0126132
ENSRNOG00000017307	Prss23	ensembl	200.064	284.285	1.42869	0.0126189
ENSRNOG00000049575	Atn1	ensembl	130.182	193.222	1.49297	0.012686
ENSRNOG00000035640	Mir30e	ensembl	4.54887	0	0.026674	0.0127153
ENSRNOG00000019322	Notch1	ensembl	357.894	490.749	1.37546	0.0127195
ENSRNOG00000021110	Mllt11	ensembl	1837.01	2281.1	1.24704	0.0127278
ENSRNOG00000005783	Dlg5	ensembl	590.954	747.29	1.2698	0.0127327
ENSRNOG00000049295	AABR07071891.1	ensembl	0	5.19261	43.2671	0.0127532
ENSRNOG00000017608	C2cd3	ensembl	428.335	568.973	1.33447	0.012773
ENSRNOG00000060138	AABR07015846.1	ensembl	40.4194	68.1548	1.69016	0.0127867
ENSRNOG00000029938	Pik3c2b	ensembl	287.104	399.218	1.39442	0.0128625
ENSRNOG00000016690	Idi1	ensembl	1663	1269.18	0.767421	0.0128628
ENSRNOG00000039530	Ccl27	ensembl	289.185	181.815	0.633786	0.0128895
ENSRNOG00000060694	Adam17	ensembl	917.763	692.362	0.756773	0.0128986
ENSRNOG00000017641	Rnf44	ensembl	530.299	706.747	1.33814	0.0129042
ENSRNOG00000022967	Slc35d1	ensembl	65.4557	123.12	1.87807	0.012942
ENSRNOG00000007478	Cry2	ensembl	586.352	784.431	1.34227	0.0130043
ENSRNOG00000023576	RGD1305645	ensembl	4.47059	16.9391	3.70981	0.0130245
ENSRNOG00000011151	Tenm4	ensembl	1360.33	1700.56	1.25524	0.0130458
ENSRNOG00000001293	Get4	ensembl	236.534	321.029	1.36515	0.0130501
ENSRNOG00000015380	Jup	ensembl	282.319	373.031	1.32921	0.0131404
ENSRNOG00000009745	Ppp3cc	ensembl	534.73	405.438	0.761688	0.0131598
ENSRNOG00000029399	Bcam	ensembl	281.662	202.97	0.725263	0.0131797
ENSRNOG00000024640	Oacyl	ensembl	166.608	239.378	1.43841	0.0131943
ENSRNOG00000016454	Nasp	ensembl	826.253	643.415	0.782681	0.0132002
ENSRNOG00000056118	Cic	ensembl	479.514	627.745	1.3142	0.01321
ENSRNOG00000003160	LOC100909655	ensembl	3621.79	2743.31	0.76077	0.0132134
ENSRNOG00000035583	Mir3546	ensembl	0	5.32811	44.2626	0.0132191
ENSRNOG00000015430	Nlgn2	ensembl_havana	669.463	867.577	1.30154	0.013274
ENSRNOG00000000902	Hsph1	ensembl	4859.76	6078.71	1.25659	0.0132926
ENSRNOG00000042740	Mrpl42	ensembl	266.694	177.426	0.666601	0.0133786
ENSRNOG00000033556	Spen	ensembl	1018.94	1272	1.25439	0.0134806
ENSRNOG00000013484	LOC102550391	ensembl	1757.92	1362.71	0.779065	0.0135903
ENSRNOG00000040214	AABR07059198.1	ensembl	42.314	80.9821	1.91455	0.013641
ENSRNOG00000054371	Prkcg	ensembl	324.543	442.151	1.36791	0.0136861
ENSRNOG00000020875	Celf3	ensembl	293.954	391.532	1.33536	0.0137213
ENSRNOG00000001715	Ece2	ensembl	1600.4	1282.12	0.804726	0.0137434
ENSRNOG00000049828	Crlf2	ensembl	22.9889	43.6676	1.9139	0.0137978
ENSRNOG00000010912	Mrps25	ensembl	2244.67	1531.43	0.685932	0.013805
ENSRNOG00000005298	Zfp513	ensembl	70.7458	106.754	1.51643	0.0138109
ENSRNOG00000047394	Ufd1l	ensembl	2195.92	1551.25	0.710404	0.0138271
ENSRNOG00000014485	Pdcd6	ensembl	1042.6	798.688	0.770284	0.0138472
ENSRNOG00000019825	Zdhhc24	ensembl	113.581	171.899	1.51619	0.0138549
ENSRNOG00000007324	Plxna2	ensembl	987.605	1264.06	1.28493	0.0138935
ENSRNOG00000016912	Btf3	ensembl	901.062	1159.37	1.29182	0.0139268
ENSRNOG00000056694	Gm26965	ensembl	10.8642	1.79349	0.181229	0.0139982
ENSRNOG00000001793	Heg1	ensembl	415.7	563.285	1.36189	0.0140521
ENSRNOG00000046647	Impad1	ensembl	2625.26	3228.22	1.23488	0.0140575
ENSRNOG00000005391	Prex2	ensembl	8818.37	7088.07	0.807657	0.0140635
ENSRNOG00000014493	Golga1	ensembl	1854.21	1381.06	0.749051	0.0141025
ENSRNOG00000028904	Vps9d1	ensembl	164.349	239.199	1.45957	0.0141309
ENSRNOG00000052955	AC114111.1	ensembl	0.309084	5.87543	13.1394	0.0141605
ENSRNOG00000057620	Slc6a8	ensembl	196.824	267.213	1.36359	0.0141825
ENSRNOG00000001964	Cd47	ensembl	750.187	1046.32	1.40034	0.0142048
ENSRNOG00000048409	AABR07032582.1	ensembl	26.4377	10.2808	0.389832	0.0142168
ENSRNOG00000055738	LOC103692976	ensembl	670.027	475.583	0.712491	0.0142759
ENSRNOG00000028627	Hmcn1	ensembl_havana	175.981	251.92	1.43577	0.0143656
ENSRNOG00000019584	Dlk1	ensembl	99.9409	146.904	1.47843	0.0143669
ENSRNOG00000018556	Tomm40	ensembl	240.666	157.391	0.65544	0.0143849
ENSRNOG00000045998	Sema6b	ensembl	264.385	426.105	1.61733	0.0144162
ENSRNOG00000025244	Trrap	ensembl_havana	1213.09	1582.38	1.30951	0.0144191
ENSRNOG00000060561	Gdpd1	ensembl	892.992	682.077	0.768151	0.0144232
ENSRNOG00000057006	7SK	ensembl	22.1325	48.9043	2.21076	0.014447
ENSRNOG00000059949	LOC102549061	ensembl	505.801	349.004	0.693341	0.01445
ENSRNOG00000019169	RGD1562218	ensembl	774.175	545.56	0.708299	0.0144753
ENSRNOG00000003590	Tom1l2	ensembl	2645.91	1948.19	0.739138	0.0145028
ENSRNOG00000020501	Tjp3	ensembl	19.8558	44.2157	2.21308	0.0145703
ENSRNOG00000046862	Armcx1	ensembl	1025.15	778.537	0.76351	0.0146048
ENSRNOG00000031335	Ankrd37	ensembl	160.596	109.402	0.686153	0.0146435
ENSRNOG00000018250	Tnni3	ensembl	18.1735	41.2411	2.28372	0.0146604
ENSRNOG00000019507	Hnrnpul2	ensembl	2948.09	3658.08	1.24676	0.0146632
ENSRNOG00000049951	LOC103689952	ensembl	485.583	629.842	1.30215	0.0146763
ENSRNOG00000006541	Nup107	ensembl	584.752	423	0.727984	0.0146959
ENSRNOG00000014230	Map1a	ensembl	22853	28190.2	1.23941	0.0146968
ENSRNOG00000009028	Rnf126	ensembl	81.6943	127.199	1.55852	0.0147537
ENSRNOG00000005963	Rab2a	ensembl	3932.61	3118.36	0.796332	0.0148097
ENSRNOG00000003198	RGD1305733	ensembl	4422.23	3561.94	0.809269	0.0148603
ENSRNOG00000017090	RGD1308706	ensembl	634.911	476.341	0.754655	0.0148832
ENSRNOG00000014722	Raph1	ensembl	349.755	460.229	1.32096	0.0149768
ENSRNOG00000057703	Cabp7	ensembl	230.836	162.122	0.707624	0.0149911
ENSRNOG00000013673	Msh3	ensembl	332.032	243.916	0.73858	0.0149973
ENSRNOG00000015925	Zfp131	ensembl	1932.75	1530.53	0.795826	0.0149975
ENSRNOG00000015049	Scn5a	ensembl	158.542	232.19	1.47084	0.0150181
ENSRNOG00000004284	Btg1	ensembl	697.737	881.345	1.26959	0.0150324
ENSRNOG00000007788	Glod4	ensembl	2362.02	1877.04	0.798514	0.0150579
ENSRNOG00000016210	Micalcl	ensembl	26.8805	49.6774	1.86127	0.0150892
ENSRNOG00000015320	Atp5g2	ensembl	1113.31	649.24	0.584611	0.0150895
ENSRNOG00000046112	Dedd2	ensembl	118.919	172.353	1.45349	0.0150922
ENSRNOG00000003803	Zdhhc17	ensembl	3262.91	2594.43	0.79896	0.0151371
ENSRNOG00000056009	Rab11fip5	ensembl	616.033	783.549	1.27651	0.0151422
ENSRNOG00000010150	Strbp	ensembl	6301.91	5108.45	0.814554	0.0151602
ENSRNOG00000008794	Ube2e1	ensembl	544.296	719.881	1.32627	0.0151613
ENSRNOG00000013660	Cog6	ensembl	861.726	671.235	0.783318	0.0151796
ENSRNOG00000004891	Arl14ep	ensembl	1798.31	1432.95	0.801072	0.015186
ENSRNOG00000004252	Eif3h	ensembl	1362.28	1084.05	0.798869	0.0151983
ENSRNOG00000009894	Vps50	ensembl	1781.09	1411.99	0.796754	0.0152027
ENSRNOG00000017545	Mrs2	ensembl	299.473	404.343	1.35409	0.01522
ENSRNOG00000008374	Nipsnap1	ensembl	2183.36	1705.67	0.785024	0.0152352
ENSRNOG00000048049	AABR07006049.2	ensembl	264.388	172.033	0.654344	0.0152403
ENSRNOG00000012030	Wwox	ensembl	200.023	133.147	0.666313	0.0152482
ENSRNOG00000009681	Flot2	ensembl	1288.55	1013.3	0.789953	0.0152616
ENSRNOG00000013623	Amer2	ensembl	293.109	390.87	1.33716	0.0152776
ENSRNOG00000048993	Metazoa_SRP	ensembl	2509.41	3207.53	1.28439	0.0153308
ENSRNOG00000027849	Wipf2	ensembl	110.271	176.265	1.60643	0.0153673
ENSRNOG00000038868	Iqcb1	ensembl	1719.04	1307.43	0.764403	0.0153691
ENSRNOG00000050485	Gas1	ensembl	2.62924	13.3535	4.77997	0.0153701
ENSRNOG00000037709	LOC102554790	ensembl	883.523	665.708	0.757891	0.0154482
ENSRNOG00000051702	AABR07013558.1	ensembl	0.309084	6.83098	15.1167	0.0154518
ENSRNOG00000014529	Ube2q2	ensembl	2561.96	1802.07	0.70675	0.0155229
ENSRNOG00000010194	Ift43	ensembl	180.547	112.42	0.626942	0.0155259
ENSRNOG00000054468	Fam219b	ensembl_havana	600.921	767.068	1.28217	0.0155802
ENSRNOG00000004681	Eny2	ensembl	2219.86	1649.38	0.747344	0.0155956
ENSRNOG00000009892	Adamts15	ensembl	32.7985	61.2948	1.86327	0.0155964
ENSRNOG00000043215	Rtbdn	ensembl	30.189	53.0255	1.76683	0.0156109
ENSRNOG00000029862	Spc24	ensembl	22.5336	8.19797	0.370291	0.0156182
ENSRNOG00000023650	Cops4	ensembl	3577.61	2721.92	0.763718	0.0156921
ENSRNOG00000057923	SNORA23	ensembl	107.514	64.4007	0.602145	0.0157075
ENSRNOG00000050898	AABR07034730.2	ensembl	9.96453	0.324507	0.0443054	0.0157185
ENSRNOG00000001203	Rrp1	ensembl	1564.34	1243.31	0.798853	0.0157482
ENSRNOG00000008393	Tax1bp1	ensembl	12976.5	10270.2	0.795335	0.0158311
ENSRNOG00000038999	RT1-A1	ensembl_havana	1202.21	1554.12	1.30022	0.0158395
ENSRNOG00000026900	Ppil2	ensembl	855.238	594.25	0.69762	0.0158541
ENSRNOG00000010859	Zyg11b	ensembl	959.532	1192.74	1.24831	0.0158707
ENSRNOG00000027079	Impad1	ensembl	203.745	286.59	1.41027	0.0158794
ENSRNOG00000039455	Pcdhgb6	ensembl	152.588	216.292	1.42537	0.0158981
ENSRNOG00000014006	Neto1	ensembl	344.57	448.082	1.30551	0.0159333
ENSRNOG00000033765	Eif1	ensembl_havana	424.185	574.712	1.36188	0.0160006
ENSRNOG00000056435	LOC102546764	ensembl	14.1342	32.9096	2.35139	0.0160296
ENSRNOG00000015434	Midn	ensembl	186.419	264.818	1.42348	0.0160418
ENSRNOG00000012477	Eef1a2	ensembl	3859.7	4722.87	1.22892	0.0160487
ENSRNOG00000019276	RGD735029	ensembl	1038.12	759.429	0.735975	0.0160519
ENSRNOG00000016502	Dscaml1	ensembl	126.84	182.647	1.44373	0.0160613
ENSRNOG00000020205	Agrn	ensembl	831.099	1065.34	1.28667	0.0160834
ENSRNOG00000024799	Cd93	ensembl_havana	289.269	394.961	1.37016	0.0160835
ENSRNOG00000005902	Ccdc34	ensembl	511.741	359.026	0.70662	0.0162086
ENSRNOG00000011132	LOC100362814	ensembl	576.358	724.329	1.26138	0.0162331
ENSRNOG00000001337	Setd1b	ensembl	43.3943	82.6614	1.90328	0.0163176
ENSRNOG00000054879	Zic2	ensembl	82.7628	123.8	1.50263	0.0163257
ENSRNOG00000051056	Fndc4	havana	1132.07	884.299	0.784847	0.0163647
ENSRNOG00000009576	Xpa	ensembl	116.451	172.736	1.49314	0.0163888
ENSRNOG00000002246	Slc30a9	ensembl	6667.78	5250.1	0.791327	0.0164426
ENSRNOG00000019388	Egfl7	ensembl	110.366	162.125	1.47811	0.0165165
ENSRNOG00000005841	Erp44	ensembl	1122.41	855.478	0.765807	0.0165281
ENSRNOG00000001547	Agps	ensembl	906.391	697.164	0.772397	0.0165283
ENSRNOG00000060559	snoU85	ensembl	5848.09	4238.82	0.728753	0.016529
ENSRNOG00000007111	Nrd1	ensembl	2509.39	3207.41	1.28323	0.0165711
ENSRNOG00000050784	AABR07054000.1	ensembl	118.001	68.6309	0.584911	0.0166431
ENSRNOG00000049649	Hist1h2ah	ensembl	18.6057	36.8208	1.97026	0.0166995
ENSRNOG00000007781	Stau1	ensembl	857.902	1077.88	1.26117	0.0167693
ENSRNOG00000018268	Hhip	ensembl	413.726	525.417	1.27626	0.0168578
ENSRNOG00000029134	Adgrl1	ensembl	1182.06	1496.73	1.27127	0.0168764
ENSRNOG00000017417	Gabarap	ensembl	1695.22	1351.11	0.801192	0.0168963
ENSRNOG00000046660	Gpc6	havana	147.886	214.85	1.45433	0.016914
ENSRNOG00000015708	E2f4	ensembl	344.851	443.835	1.29192	0.0171114
ENSRNOG00000000150	Dnajc1	ensembl	1225.46	955.689	0.784303	0.0171277
ENSRNOG00000019671	Rsbn1	ensembl	1939.9	1514.79	0.785023	0.0171489
ENSRNOG00000025042	Pde3a	ensembl	121.98	179.04	1.4672	0.0171511
ENSRNOG00000011745	Psma1	ensembl	1027.53	702.085	0.685253	0.0171973
ENSRNOG00000025012	Chat	ensembl	4.78655	14.8069	3.04688	0.0172053
ENSRNOG00000052835	7SK	ensembl	4.66285	0	0.0261648	0.0172134
ENSRNOG00000021164	Stip1	ensembl	5224.99	4178.86	0.803267	0.0173766
ENSRNOG00000048708	Exosc1	ensembl	181.007	117.566	0.655643	0.0174134
ENSRNOG00000003435	Mcf2	ensembl	86.7471	130.871	1.51331	0.0174496
ENSRNOG00000010184	Brk1	ensembl	663.353	498.385	0.755016	0.0174674
ENSRNOG00000008309	Rpa3	ensembl	88.3826	52.2604	0.59566	0.0174943
ENSRNOG00000061310	AABR07064840.1	ensembl	12.42	26.8463	2.16502	0.0175912
ENSRNOG00000002896	Prdx6	ensembl_havana	1424.01	1101.94	0.777641	0.0176777
ENSRNOG00000055844	SNORA28	ensembl	54.5147	24.133	0.448922	0.0176841
ENSRNOG00000020004	Rbm34	ensembl	878.744	685.697	0.78461	0.017708
ENSRNOG00000011688	Neil3	ensembl	0.69301	8.07909	10.1391	0.0177286
ENSRNOG00000020929	Lin37	ensembl	216.816	132.886	0.617327	0.0177468
ENSRNOG00000009110	Psen1	ensembl	1053.17	807.079	0.770629	0.0177754
ENSRNOG00000046051	Sccpdh	ensembl	2343.77	1706.45	0.731052	0.0177895
ENSRNOG00000016913	Stk36	ensembl	60.2558	92.6982	1.54673	0.0177903
ENSRNOG00000022691	St8sia5	ensembl	33.6055	62.5871	1.86039	0.0178028
ENSRNOG00000058830	AC132699.2	ensembl	0	5.15774	42.5181	0.017819
ENSRNOG00000006136	Pdpk1	ensembl	1544.39	1128.16	0.734612	0.0178402
ENSRNOG00000060673	SNORA17	ensembl	12.9057	2.03155	0.161375	0.0178468
ENSRNOG00000001201	Cstb	ensembl	528.977	404.555	0.767932	0.0178966
ENSRNOG00000003789	AABR07037054.1	ensembl	1023.1	716.272	0.704157	0.0179043
ENSRNOG00000001009	Bri3	ensembl_havana	100.569	157.34	1.56546	0.0179072
ENSRNOG00000045884	AABR07030590.1	ensembl	368.841	474.25	1.29165	0.0179178
ENSRNOG00000000931	Sfswap	ensembl	547.281	686.501	1.26046	0.0179426
ENSRNOG00000007979	Phospho2	ensembl	922.885	726.154	0.790406	0.0179481
ENSRNOG00000020781	Tbcb	ensembl	544.658	729.93	1.34711	0.0180158
ENSRNOG00000013743	Sec61a1	ensembl	636.133	498.07	0.786044	0.0180788
ENSRNOG00000014530	Nav2	ensembl	377.533	482.664	1.28304	0.0180829
ENSRNOG00000002832	Slc16a2	ensembl	33.3478	59.3979	1.7867	0.0181009
ENSRNOG00000052664	LOC100910717	ensembl	2193.68	1755.85	0.803741	0.018117
ENSRNOG00000007330	Capzb	ensembl	3141.5	2271.37	0.726899	0.0181309
ENSRNOG00000012634	Fbxo10	ensembl	1130.59	883.198	0.785212	0.0181422
ENSRNOG00000021101	Sema6c	ensembl	39.5864	65.4604	1.65429	0.0181713
ENSRNOG00000021068	Pip5k1a	ensembl	711.425	888.086	1.25349	0.0181889
ENSRNOG00000016612	Trim36	ensembl	132.641	213.959	1.61694	0.0182174
ENSRNOG00000011634	Xkr6	ensembl	233.039	325.808	1.39986	0.0182594
ENSRNOG00000002244	Pdgfra	ensembl	2402.52	1909.76	0.79885	0.0182707
ENSRNOG00000019262	Trak1	ensembl	1012.18	1330.63	1.3206	0.0182818
ENSRNOG00000056629	AABR07024500.1	ensembl	31.2105	55.7085	1.78391	0.0183806
ENSRNOG00000018903	Pik3r1	ensembl	3558.68	2783.74	0.786317	0.018381
ENSRNOG00000017940	Rere	ensembl	3874.25	2979.28	0.772059	0.0183897
ENSRNOG00000011387	Tet3	ensembl	332.698	444.684	1.34004	0.0184568
ENSRNOG00000014630	Iws1	ensembl	3436.05	2730.69	0.798931	0.0184639
ENSRNOG00000017925	Gapvd1	ensembl	2384.43	2908.81	1.22518	0.0184815
ENSRNOG00000043102	Bahcc1	ensembl	42.2698	80.1341	1.89652	0.0185265
ENSRNOG00000057457	U1	ensembl	0.618168	7.17152	9.23006	0.018557
ENSRNOG00000042977	Mtx1	ensembl	872.907	1168.2	1.344	0.0185762
ENSRNOG00000051289	Rn50_X_0693.1	havana	188.881	103.446	0.55342	0.0187236
ENSRNOG00000023548	Sned1	ensembl	78.3695	118.162	1.51933	0.0187432
ENSRNOG00000006841	Ano4	ensembl	1012.53	758.616	0.753797	0.018766
ENSRNOG00000010971	Snx18	ensembl	541.341	678.721	1.25944	0.0187892
ENSRNOG00000005289	Prkd3	ensembl	444.098	327.608	0.739859	0.0188179
ENSRNOG00000014358	Zic5	ensembl	40.8597	69.9641	1.71678	0.0189042
ENSRNOG00000061650	Cdhr4	ensembl	34.7616	69.9125	2.00139	0.0189696
ENSRNOG00000019453	Rps5	ensembl	1792.23	2400.76	1.34672	0.0189844
ENSRNOG00000031993	Prim1	ensembl	535.682	397.032	0.745148	0.0189921
ENSRNOG00000014375	Adgrb2	ensembl	643.523	854.755	1.33213	0.0190614
ENSRNOG00000017631	Cyp20a1	ensembl	341.302	254.641	0.749731	0.0190793
ENSRNOG00000007518	Nckap1	ensembl	11622.8	9580.38	0.828035	0.0190971
ENSRNOG00000018553	Pitpnm1	ensembl	1461.53	1838.75	1.2632	0.019108
ENSRNOG00000024414	Ate1	ensembl	5575.9	4302.24	0.775371	0.0191586
ENSRNOG00000012619	Epor	ensembl	0.65731	7.51379	9.497	0.0191962
ENSRNOG00000007112	LOC103690091	ensembl	300.869	436.522	1.45599	0.0191978
ENSRNOG00000051082	Rn50_X_0744.2	havana	1.07694	7.24106	6.33209	0.019287
ENSRNOG00000026455	Gpd1l	ensembl	215.715	310.734	1.44981	0.019337
ENSRNOG00000020298	Bag3	ensembl	122.479	175.889	1.44557	0.0193551
ENSRNOG00000025034	RGD1304567	ensembl	283.712	205.89	0.727842	0.0193581
ENSRNOG00000004493	Tasp1	ensembl	452.7	309.153	0.686371	0.0193592
ENSRNOG00000045918	Jarid2	ensembl	594.149	747.692	1.26377	0.0193605
ENSRNOG00000003997	Pld5	ensembl	139.049	208.477	1.51247	0.0193828
ENSRNOG00000011119	LOC100363675	ensembl	157.33	219.328	1.39797	0.0194265
ENSRNOG00000024905	Drc1	ensembl_havana	947.217	716.166	0.759774	0.0194876
ENSRNOG00000038600	Dnaaf3	ensembl	53.4109	85.4585	1.60517	0.0195184
ENSRNOG00000052394	AC141136.1	ensembl	23.0794	8.38612	0.373843	0.0195602
ENSRNOG00000009595	Zbtb48	ensembl	75.5571	114.286	1.52006	0.0196293
ENSRNOG00000020527	Drap1	ensembl	1932.03	1558.75	0.80994	0.0196317
ENSRNOG00000009278	Ift88	ensembl_havana	734.73	555.977	0.760549	0.0196406
ENSRNOG00000004180	Fam19a2	ensembl	842.336	644.626	0.769817	0.0196708
ENSRNOG00000025806	Prr3	ensembl_havana	269.328	352.262	1.31345	0.0197195
ENSRNOG00000012229	T	ensembl	0.65731	6.62672	8.43242	0.0197455
ENSRNOG00000034254	Actb	ensembl	11199.1	13572.9	1.21755	0.0197464
ENSRNOG00000006326	Atraid	ensembl	180.324	126.051	0.704007	0.019774
ENSRNOG00000010719	Exosc10	ensembl	796.176	633.8	0.800059	0.0198188
ENSRNOG00000016208	Setbp1	ensembl	496.044	643.094	1.30052	0.0198436
ENSRNOG00000059373	M6pr	ensembl	801.549	636.711	0.798414	0.0198521
ENSRNOG00000023661	Celf2	ensembl	341.21	474.901	1.3944	0.0199865
ENSRNOG00000009781	Dync1i2	ensembl	6946.34	5361.15	0.775376	0.0200938
ENSRNOG00000022411	RGD1561958	ensembl	10.2364	1.33183	0.139238	0.0201054
ENSRNOG00000012989	Serinc2	ensembl	0	5.97634	49.0352	0.0201322
ENSRNOG00000004505	Nfic	ensembl	50.8261	82.298	1.63506	0.0201533
ENSRNOG00000045698	Lin7c	ensembl	2066.69	1668.28	0.810945	0.0202698
ENSRNOG00000049622	LOC103690013	ensembl	110.041	70.5115	0.643006	0.0202795
ENSRNOG00000011932	Snrpa1	ensembl	855.444	651.997	0.765761	0.0203321
ENSRNOG00000006984	Mapk11	ensembl	152.621	210.191	1.38009	0.020336
ENSRNOG00000047302	Btbd8	ensembl	34.1679	62.9442	1.83748	0.0204071
ENSRNOG00000025053	Lrp1	ensembl	10809.8	13813.1	1.28308	0.0204488
ENSRNOG00000014405	Aprt	ensembl	254.328	395.693	1.55753	0.0204636
ENSRNOG00000001037	Gpalpp1	ensembl	677.388	520.38	0.771508	0.0204876
ENSRNOG00000004214	Rpl26	ensembl	2561.23	2001.89	0.785927	0.0205076
ENSRNOG00000014018	St8sia1	ensembl	376.437	269.564	0.721251	0.0205806
ENSRNOG00000023496	Fam189a1	ensembl	30.1595	53.8835	1.79318	0.0206227
ENSRNOG00000029450	Adgrb1	ensembl_havana	1099.08	1362.73	1.24463	0.0206701
ENSRNOG00000008672	Chmp5	ensembl	4037.31	3206.35	0.798155	0.0206804
ENSRNOG00000002818	Eftud2	ensembl	881.919	1167.67	1.33031	0.0206928
ENSRNOG00000013465	Tepp	ensembl	36.556	63.8009	1.74671	0.0206991
ENSRNOG00000031927	Klk6	ensembl	96.0659	146.844	1.53488	0.0207131
ENSRNOG00000014124	Nod2	ensembl	13.5232	3.07433	0.236645	0.0207139
ENSRNOG00000000186	Tst	ensembl	285.256	369.754	1.30262	0.0207237
ENSRNOG00000010370	Tnip1	ensembl	727.188	567.904	0.785323	0.0207837
ENSRNOG00000054752	7SK	ensembl	625.418	1010.12	1.62346	0.0208471
ENSRNOG00000012994	Pus3	ensembl	603.904	472.85	0.786777	0.0208633
ENSRNOG00000054118	Tpgs2	ensembl	459.561	346.053	0.755691	0.0209115
ENSRNOG00000031273	RGD1559972	ensembl	1049.81	1376.83	1.31752	0.0209497
ENSRNOG00000001689	Arl6	ensembl	802.564	601.478	0.753681	0.0209907
ENSRNOG00000001235	Gna12	ensembl	1474.56	1824.12	1.24183	0.0210069
ENSRNOG00000005616	Ncoa3	ensembl	465.124	621.879	1.343	0.0210221
ENSRNOG00000018653	Pfdn1	ensembl	4294.6	3306.36	0.7737	0.021077
ENSRNOG00000027212	Tekt3	ensembl	61.101	34.9065	0.572061	0.0210919
ENSRNOG00000028782	RGD1565498	ensembl	73.5501	110.032	1.50477	0.0210952
ENSRNOG00000049489	LOC102552166	ensembl	225.709	134.881	0.600128	0.0211401
ENSRNOG00000015676	Brd9	ensembl	2061.81	1510.25	0.736566	0.0211432
ENSRNOG00000011572	Klc1	ensembl	8665.29	10566.2	1.22498	0.0211709
ENSRNOG00000014582	Mrpl18	ensembl_havana	619.041	464.878	0.755566	0.0211763
ENSRNOG00000028526	Mansc1	ensembl	11.282	28.4516	2.51104	0.0212003
ENSRNOG00000012488	Rab2b	ensembl	1557.54	1164.46	0.750929	0.0212075
ENSRNOG00000034240	Bcor	ensembl	283.679	383.711	1.35596	0.0212596
ENSRNOG00000001059	Usp42	ensembl_havana	259.553	340.396	1.31569	0.0212629
ENSRNOG00000012284	Khdrbs2	ensembl	477.792	357.062	0.749279	0.0213093
ENSRNOG00000013240	Ptger4	ensembl	42.3782	72.8932	1.73415	0.0213546
ENSRNOG00000012988	Lix1	ensembl	2717.65	2153.69	0.79626	0.0214121
ENSRNOG00000046922	Phactr4	ensembl	189.608	259.887	1.37474	0.0214662
ENSRNOG00000041826	AABR07053152.1	ensembl	51.4089	81.8884	1.59732	0.0214985
ENSRNOG00000012602	Recql	ensembl	421.519	530.84	1.26487	0.0215082
ENSRNOG00000013369	Gbx1	ensembl	6.53801	0	0.0186456	0.0215192
ENSRNOG00000016001	Chmp1a	ensembl	934.048	706.93	0.761649	0.0215288
ENSRNOG00000017100	LOC100910779	ensembl	2430.64	1912.4	0.790627	0.0216142
ENSRNOG00000008577	Fbf1	ensembl	430.831	544.643	1.26874	0.021729
ENSRNOG00000011684	Auh	ensembl	1611.34	1265.74	0.78983	0.021746
ENSRNOG00000020551	Bles03	ensembl	80.4235	122.895	1.53131	0.0217665
ENSRNOG00000020865	Ano1	ensembl	48.9058	79.5437	1.63443	0.0217862
ENSRNOG00000000702	Sart3	ensembl	926.524	1161.62	1.25971	0.0218145
ENSRNOG00000029549	Eci2	ensembl	504.156	387.084	0.771902	0.0218307
ENSRNOG00000003262	Cacng4	ensembl	239.3	352.441	1.47889	0.021897
ENSRNOG00000031197	F8	ensembl	144.476	205.061	1.42646	0.0219144
ENSRNOG00000027606	Neurl1b	ensembl	2.66494	10.6402	3.81598	0.0219353
ENSRNOG00000047293	LOC100366030	ensembl	18.5017	6.38701	0.352942	0.0220313
ENSRNOG00000009072	AABR07056013.1	ensembl	227.151	312.044	1.37905	0.0220528
ENSRNOG00000054294	Rprd2	ensembl	920.74	1155.06	1.25885	0.0220678
ENSRNOG00000001324	Asmt	ensembl	5.55441	15.7444	2.8101	0.0220885
ENSRNOG00000009664	Ankrd42	ensembl	1108.75	875.03	0.793158	0.0221358
ENSRNOG00000000895	Rabgef1	ensembl	1114.67	815.796	0.736059	0.0222003
ENSRNOG00000019229	Fbl	ensembl	36.8144	66.7784	1.81471	0.0222854
ENSRNOG00000005049	Tbr1	ensembl	33.323	61.9095	1.86523	0.0223822
ENSRNOG00000007456	Calb1	ensembl	2925.16	2337.78	0.802734	0.0223901
ENSRNOG00000001344	Aldh2	ensembl	404.087	517.164	1.28535	0.0224397
ENSRNOG00000001229	Col18a1	ensembl	75.5168	136.435	1.80364	0.0225394
ENSRNOG00000029903	Spock3	ensembl	7261.3	5747.08	0.795253	0.0225836
ENSRNOG00000005043	Cpeb2	ensembl	259.709	344.279	1.33032	0.0226091
ENSRNOG00000054091	SNORA38	ensembl	115.191	56.4731	0.494585	0.0226451
ENSRNOG00000008961	Mapre3	ensembl	738.233	981.279	1.3341	0.0226528
ENSRNOG00000028390	Hhipl1	ensembl	71.8199	39.8249	0.5565	0.0226966
ENSRNOG00000018507	Gfpt1	ensembl	1621.88	2007.38	1.24247	0.0227039
ENSRNOG00000019721	Ypel3	ensembl	2050.61	1543.16	0.756315	0.0228064
ENSRNOG00000016961	Rps27	ensembl	314.874	435.447	1.38502	0.0228138
ENSRNOG00000028557	Hibch	ensembl	991.435	742.225	0.750751	0.0228485
ENSRNOG00000059322	N4bp2l1	ensembl	991.641	773.187	0.783412	0.0229061
ENSRNOG00000058306	AABR07060318.1	ensembl	26.4925	11.8011	0.448753	0.0229103
ENSRNOG00000059466	AC126572.3	ensembl	51.8542	24.3871	0.474719	0.0229158
ENSRNOG00000015479	Mrps34	ensembl	224.448	306.25	1.36911	0.0229644
ENSRNOG00000056765	Rpl10	ensembl	1278.1	1024.25	0.805532	0.0230345
ENSRNOG00000051606	LOC100360380	ensembl	508.054	380.754	0.754238	0.0230412
ENSRNOG00000007628	Ptp4a3	ensembl	266.346	355.756	1.33829	0.0230645
ENSRNOG00000002956	Stim2	ensembl	2054.03	1580.34	0.772731	0.023099
ENSRNOG00000002280	Sh3bgrl	ensembl	677.496	428.14	0.634452	0.0231295
ENSRNOG00000031422	Krt39	ensembl_havana	5.83467	0.324507	0.0745703	0.0231324
ENSRNOG00000009478	RGD1359108	ensembl	1094.04	824.667	0.758311	0.0231569
ENSRNOG00000030225	Clpx	ensembl	2264.55	1793.74	0.796193	0.0231698
ENSRNOG00000054277	Capsl	ensembl	89.2116	56.9215	0.642053	0.0231986
ENSRNOG00000004531	Tceanc	ensembl	16.3316	32.9077	2.00228	0.0232154
ENSRNOG00000023935	Nrsn2	ensembl	1424.86	1136.07	0.800861	0.0232996
ENSRNOG00000017383	l7Rn6	ensembl	390.637	553.531	1.4215	0.0233111
ENSRNOG00000003849	Stx8	ensembl	411.69	315.757	0.77054	0.0234337
ENSRNOG00000017762	Cdhr5	ensembl	12.3809	25.9421	2.09326	0.0234676
ENSRNOG00000018939	Rexo2	ensembl	861.171	539.023	0.627561	0.0234743
ENSRNOG00000015756	Nphp1	ensembl	2184.71	1757.51	0.808189	0.0234888
ENSRNOG00000015382	Arid5a	ensembl	50.4913	82.4682	1.63278	0.023509
ENSRNOG00000056939	SNORA30	ensembl	21.0135	8.65827	0.417301	0.0235157
ENSRNOG00000019519	Idnk	ensembl	69.175	42.5569	0.61932	0.0235518
ENSRNOG00000024066	Fundc2	ensembl	274.301	189.253	0.692028	0.0235798
ENSRNOG00000016560	RGD1306058	ensembl	22.559	40.9333	1.82085	0.0236332
ENSRNOG00000055401	Kcnc1	ensembl	573.785	720.386	1.26122	0.0236814
ENSRNOG00000002759	Lias	ensembl	925.94	744.581	0.80788	0.0237226
ENSRNOG00000017412	AABR07001512.1	ensembl	531.879	390.598	0.738151	0.0237455
ENSRNOG00000005877	Lrpprc	ensembl	3440.51	2811.87	0.820916	0.0237747
ENSRNOG00000017625	Htr2b	ensembl	24.7373	59.8543	2.40706	0.0238126
ENSRNOG00000053258	Faim2	ensembl	1539.98	1906.79	1.24291	0.0239867
ENSRNOG00000015734	Ube3a	ensembl	12515.1	10109	0.81157	0.0239972
ENSRNOG00000022429	RGD1312005	ensembl	1843.88	2438.11	1.32739	0.0240132
ENSRNOG00000050445	Gde1	ensembl	1356.07	1050.5	0.777752	0.0240421
ENSRNOG00000058926	AC111319.2	ensembl	9.68365	22.2004	2.2922	0.0240727
ENSRNOG00000059655	RGD1564855	ensembl	380.425	511.891	1.3547	0.0241206
ENSRNOG00000007743	Mgst1	ensembl	287.125	201.952	0.707924	0.0241394
ENSRNOG00000006403	Pvrl1	ensembl	603.652	777.29	1.29201	0.0241678
ENSRNOG00000014928	Apba1	ensembl	1284.35	1564.65	1.22374	0.0241727
ENSRNOG00000019168	Nxt2	ensembl	363.373	272.467	0.753726	0.0242538
ENSRNOG00000010392	Nrg1	ensembl	330.266	430.134	1.30915	0.0243364
ENSRNOG00000018985	Adrbk1	ensembl	1122.1	822.179	0.735015	0.0243595
ENSRNOG00000012738	Eif3m	ensembl	2762.81	2093.12	0.76196	0.0244738
ENSRNOG00000001991	Atp5o	ensembl	1398.38	1088.1	0.781438	0.0245337
ENSRNOG00000008691	Ick	ensembl	180.405	246.856	1.37639	0.0245462
ENSRNOG00000007839	Slc16a7	ensembl	214.967	306.355	1.43485	0.0245699
ENSRNOG00000019152	Trpc4ap	ensembl	1710.9	2077.67	1.21968	0.0246211
ENSRNOG00000061484	Adamts2	ensembl	52.6402	89.5295	1.71151	0.0246478
ENSRNOG00000023679	Prdm5	ensembl	929.228	731.444	0.79065	0.0246848
ENSRNOG00000008565	Nkiras1	ensembl	783.323	627.992	0.805261	0.0247243
ENSRNOG00000012292	Alg8	ensembl	66.244	103.557	1.55988	0.0247448
ENSRNOG00000013356	Snapin	ensembl	1889.87	1516.79	0.806551	0.024765
ENSRNOG00000020076	Borcs7	ensembl	1215.34	936.16	0.773765	0.0247974
ENSRNOG00000017001	Zfp652	ensembl	616.121	780.139	1.27395	0.0248255
ENSRNOG00000028461	Gnl3	ensembl	1200.06	947.53	0.79377	0.0248357
ENSRNOG00000002514	Ccdc93	ensembl	400.243	552.689	1.38865	0.0248509
ENSRNOG00000026260	Rpl11	ensembl	2003.28	1465.81	0.734472	0.0248516
ENSRNOG00000061428	Gm1141	ensembl	0	4.76583	39.9668	0.0248941
ENSRNOG00000057261	Metazoa_SRP	ensembl	1.3929	9.28952	6.25719	0.0249075
ENSRNOG00000021497	Akt3	ensembl	6792.76	5276.2	0.780697	0.0249242
ENSRNOG00000009432	Eif2s1	ensembl	1314.72	1046.77	0.800463	0.0249657
ENSRNOG00000049351	Nat8l	ensembl	1194.75	1472.42	1.2376	0.0249859
ENSRNOG00000024342	Rn50_12_0174.1	havana	0.309084	6.86664	15.4765	0.024995
ENSRNOG00000052418	Cpsf3	ensembl	1490.24	1200.74	0.80986	0.0250191
ENSRNOG00000045638	AABR07019083.2	ensembl	0	4.15012	34.4796	0.0251311
ENSRNOG00000049397	AABR07049880.1	ensembl	311.638	230.068	0.742262	0.0251736
ENSRNOG00000058987	Rn60_20_0049.10	havana	0.966394	8.59174	7.77679	0.0251819
ENSRNOG00000004169	Fzr1	ensembl	177.784	259.794	1.46339	0.0252542
ENSRNOG00000031834	Nkain4	ensembl	149.108	228.402	1.53374	0.0253263
ENSRNOG00000004276	Itga3	ensembl	450.045	582.753	1.29855	0.0253367
ENSRNOG00000046791	Sh3rf3	ensembl	100.782	65.9165	0.656959	0.0253394
ENSRNOG00000028187	Sp9	ensembl	7.07101	19.3671	2.70332	0.0253571
ENSRNOG00000002864	Nacc1	ensembl	663.083	828.133	1.25312	0.0253722
ENSRNOG00000002903	Specc1	ensembl	4100.43	3265	0.800299	0.0253961
ENSRNOG00000017832	Snx2	ensembl	3312.42	2505.61	0.760566	0.025415
ENSRNOG00000053725	Usf2	ensembl	461.816	321.787	0.700016	0.0254372
ENSRNOG00000025545	Tvp23a	ensembl	179.698	240.415	1.34125	0.0254687
ENSRNOG00000005258	Myef2	ensembl	3855.63	2999.38	0.781942	0.0255254
ENSRNOG00000049197	Olr267	ensembl	8.70565	0	0.0140893	0.0255348
ENSRNOG00000058519	AABR07017189.1	ensembl	1.04124	7.1552	6.26303	0.025541
ENSRNOG00000025498	Crb2	ensembl	16.631	32.7386	1.97944	0.0256201
ENSRNOG00000012002	Iqgap1	ensembl	474.6	593.659	1.25536	0.0256261
ENSRNOG00000046899	AABR07031972.1	ensembl	143.084	98.8453	0.693001	0.0256943
ENSRNOG00000051532	SNORA68	ensembl	47.8762	26.2987	0.551966	0.0257036
ENSRNOG00000000827	Ier3	ensembl_havana	29.2921	50.9597	1.74267	0.0257037
ENSRNOG00000033979	Gm5471	ensembl	191.629	267.349	1.40181	0.0257275
ENSRNOG00000018824	Slc7a5	ensembl	659.008	828.031	1.26063	0.0257565
ENSRNOG00000053795	SNORD45	ensembl	17.1702	34.155	1.96912	0.0257884
ENSRNOG00000019725	Actr1a	ensembl	5933.46	4898.53	0.829471	0.0258179
ENSRNOG00000012722	Ppdpf	ensembl	527.373	407.87	0.777026	0.0258338
ENSRNOG00000020130	Arhgef1	ensembl	138.685	200.814	1.45056	0.025884
ENSRNOG00000025612	Sez6l	ensembl	1761.32	2169.87	1.23758	0.0258965
ENSRNOG00000004229	Tac3	ensembl	187.701	107.936	0.578545	0.025933
ENSRNOG00000007349	Ascc2	ensembl	138.607	189.254	1.37221	0.0259814
ENSRNOG00000054929	AABR07072414.1	ensembl	4.78655	14.4649	2.98062	0.0259853
ENSRNOG00000028879	Slc4a8	ensembl	572.784	738.46	1.29547	0.0259995
ENSRNOG00000006393	Sirt6	ensembl	129.963	87.3319	0.67573	0.0260248
ENSRNOG00000012693	Pmpcb	ensembl	1065.12	826.222	0.778614	0.0260315
ENSRNOG00000012564	RGD1564541	ensembl_havana	1610.1	1285.67	0.802921	0.0260398
ENSRNOG00000001490	Pdcd2	ensembl	441.185	328.563	0.748061	0.0260726
ENSRNOG00000050655	P4ha1	ensembl	1576.21	1280.35	0.816046	0.0260777
ENSRNOG00000003977	Dusp1	ensembl	81.9214	123.016	1.50672	0.0260793
ENSRNOG00000015621	Whsc1l1	ensembl	1639.77	2016.59	1.23569	0.0261045
ENSRNOG00000023861	Snap91	ensembl	5782.17	4691.4	0.814728	0.0261128
ENSRNOG00000016498	AABR07004112.1	ensembl	10285.5	8376.23	0.818501	0.026143
ENSRNOG00000021270	Trmt6	ensembl	474.599	332.252	0.704744	0.0261771
ENSRNOG00000017035	Cep120	ensembl	1129.84	918.414	0.816643	0.0262178
ENSRNOG00000017673	Brsk1	ensembl	1648.9	2117.18	1.28871	0.0262875
ENSRNOG00000007869	Wscd1	ensembl	1616.13	1993.85	1.23916	0.0263714
ENSRNOG00000052224	Celf6	ensembl	1079.23	1322.87	1.2321	0.0263914
ENSRNOG00000003686	Tbl1x	ensembl	1368.42	1679.61	1.23314	0.0263981
ENSRNOG00000013981	Ptpn5	ensembl	815.071	1015.82	1.2512	0.0264017
ENSRNOG00000020618	Rpl13a	ensembl	2978.78	2046.25	0.690685	0.0264353
ENSRNOG00000020029	Fam195a	ensembl	15.0101	30.0223	1.99551	0.0264482
ENSRNOG00000049198	LOC684841	ensembl	55.0553	83.3219	1.516	0.0264639
ENSRNOG00000023480	Nabp2	ensembl	1070.3	793.13	0.743875	0.0264747
ENSRNOG00000013795	Asb7	ensembl	244.761	324.81	1.33159	0.0264816
ENSRNOG00000002126	Ncam2	ensembl	7139.76	5884.58	0.827988	0.0265499
ENSRNOG00000029330	Car5b	ensembl	255.924	186.881	0.735107	0.026563
ENSRNOG00000030318	Gpr83	ensembl	124.794	86.2275	0.695386	0.0265703
ENSRNOG00000061763	AABR07012039.1	ensembl	35.0284	18.2726	0.524559	0.026586
ENSRNOG00000002275	Fip1l1	ensembl	5658.97	4445.32	0.789206	0.0266769
ENSRNOG00000049918	Lrg1	ensembl	10.79	2.20308	0.217175	0.026691
ENSRNOG00000002599	Grap	ensembl	80.658	38.2737	0.481427	0.0267568
ENSRNOG00000013892	Cby1	ensembl	590.034	432.414	0.735495	0.0267643
ENSRNOG00000020153	Supt3h	ensembl	239.036	173.013	0.727992	0.0267936
ENSRNOG00000051476	AABR07055146.1	ensembl	20.9181	7.32586	0.356276	0.0268102
ENSRNOG00000016408	Kirrel	ensembl	125.918	172.721	1.37879	0.0268364
ENSRNOG00000007125	Vps54	ensembl	1198.34	974.875	0.817615	0.0268378
ENSRNOG00000003863	RGD1564093	ensembl	1374.53	1801.1	1.31755	0.0268602
ENSRNOG00000010248	Serpini1	ensembl	3620.6	2947.43	0.818003	0.0269833
ENSRNOG00000018304	Lars	ensembl_havana	3329.71	2672.57	0.806101	0.0270662
ENSRNOG00000001528	Gap43	ensembl	10983.2	8824.77	0.807353	0.0270768
ENSRNOG00000031643	Dchs1	ensembl	364.325	493.851	1.36013	0.0270938
ENSRNOG00000025005	Ccdc190	ensembl	109.531	159.862	1.4651	0.0271701
ENSRNOG00000018194	Srrm1	ensembl	1251.03	1611.43	1.29325	0.0272027
ENSRNOG00000026488	Gltpd2	ensembl	1559.54	1234.44	0.795122	0.0272796
ENSRNOG00000022375	AABR07030375.1	ensembl	78.466	46.8935	0.600235	0.0272908
ENSRNOG00000046527	Phf20l1	ensembl	1708.24	1353.01	0.796022	0.0274014
ENSRNOG00000021184	Mark2	ensembl	354.19	457.243	1.29457	0.0274031
ENSRNOG00000007925	Pak6	ensembl	379.631	492.931	1.30165	0.0274036
ENSRNOG00000017858	Tsr3	ensembl	44.1256	68.3792	1.55686	0.027406
ENSRNOG00000054483	AABR07012711.1	ensembl	8.15766	0.665916	0.0927487	0.0274877
ENSRNOG00000049706	AABR07012575.1	ensembl	7.51318	0.973234	0.14384	0.0274934
ENSRNOG00000030520	Sarnp	ensembl	3555.47	2859.47	0.808081	0.0275392
ENSRNOG00000000341	Nid2	ensembl	40.2046	65.8724	1.64172	0.0275872
ENSRNOG00000045919	LOC100360477	ensembl	3.32569	12.9455	3.74191	0.0275984
ENSRNOG00000047816	Ccs	ensembl	348.61	263.411	0.760269	0.0276056
ENSRNOG00000006864	Scaper	ensembl	4552.62	3633.77	0.801989	0.0276158
ENSRNOG00000006905	Hectd1	ensembl	14829.5	12064	0.817526	0.0276538
ENSRNOG00000054183	MIMT1_1	ensembl	408.654	292.817	0.720449	0.0276543
ENSRNOG00000040136	LOC681766	ensembl	10.5458	25.4114	2.36158	0.0276657
ENSRNOG00000047984	Mrps22	ensembl	1083.9	791.352	0.73282	0.0277204
ENSRNOG00000020204	Srp19	ensembl	1408.86	1070.88	0.763624	0.0277254
ENSRNOG00000004322	Sh3kbp1	ensembl	1835.51	1414.72	0.774502	0.027781
ENSRNOG00000061768	Slc43a3	ensembl	37.8493	20.9717	0.557434	0.0279224
ENSRNOG00000060105	Astn2	ensembl_havana	626.469	782.888	1.2545	0.0279273
ENSRNOG00000055319	Mrfap1	ensembl_havana	9043.13	10818.6	1.20186	0.0280339
ENSRNOG00000050854	LOC100912455	ensembl	31.5196	53.2999	1.68552	0.0281087
ENSRNOG00000024470	Lman1	ensembl	1470.78	1167.65	0.797808	0.0281235
ENSRNOG00000004139	Ndel1	ensembl	3997.84	3188.92	0.801523	0.0282532
ENSRNOG00000058586	Tyro3	ensembl	304.399	406.775	1.33892	0.0283554
ENSRNOG00000037339	Siglec10	ensembl	7.345	0.290416	0.0582657	0.0283667
ENSRNOG00000025497	Fbxl6	ensembl	56.3774	88.4465	1.57215	0.0284648
ENSRNOG00000047499	Rbm15	ensembl	337.473	433.443	1.28801	0.028506
ENSRNOG00000006075	Fez1	ensembl	7596.63	5913.59	0.782103	0.0285585
ENSRNOG00000026797	Slc9c2	ensembl_havana	38.5355	20.2723	0.529863	0.0285908
ENSRNOG00000006967	Xiap	ensembl	1035.71	1264.3	1.22642	0.0286221
ENSRNOG00000036485	AABR07046831.1	ensembl	17.7408	6.0794	0.35005	0.0286496
ENSRNOG00000011489	R3hdm4	ensembl	342.949	440.117	1.28655	0.0286674
ENSRNOG00000022160	Rtp2	ensembl	0	4.42364	36.7409	0.0286675
ENSRNOG00000001620	Prdm15	ensembl	136.117	189.427	1.39419	0.0286726
ENSRNOG00000052882	AABR07051370.1	ensembl	0	3.99657	33.5646	0.0286854
ENSRNOG00000012209	Cdadc1	ensembl	923.208	727.21	0.791903	0.0287225
ENSRNOG00000051899	AABR07000159.2	ensembl	5.31956	0	0.022683	0.0287697
ENSRNOG00000025787	Spag6	ensembl	120.017	183.115	1.53052	0.0287904
ENSRNOG00000027520	Pls3	ensembl	3119.2	2556.67	0.823801	0.0287911
ENSRNOG00000015192	Mrps5	ensembl	1724.74	1332.62	0.776744	0.0289427
ENSRNOG00000060572	Tlk1	ensembl	1787.14	1406.57	0.791015	0.0289439
ENSRNOG00000022448	Htra2	ensembl	120.143	173.644	1.44747	0.0289489
ENSRNOG00000012962	Nudt16	ensembl	87.9182	53.7108	0.618002	0.0290277
ENSRNOG00000002039	Evi5	ensembl	4312.06	3480.04	0.811183	0.0291093
ENSRNOG00000016274	Zfp580	ensembl	16.5032	35.1276	2.13156	0.0291626
ENSRNOG00000010768	Kpna4	ensembl	1094.05	843.281	0.774026	0.0292674
ENSRNOG00000023148	Col11a1	ensembl	291.244	392.21	1.34945	0.0292784
ENSRNOG00000026600	Caps2	ensembl	9.67677	23.6204	2.43871	0.0292829
ENSRNOG00000020159	Dalrd3	ensembl	889.555	711.163	0.802725	0.0293083
ENSRNOG00000006384	Ddx58	ensembl	69.486	102.572	1.4876	0.0293392
ENSRNOG00000055028	AC111812.1	ensembl	355.503	489.609	1.38161	0.0293532
ENSRNOG00000051334	Rn50_1_1373.2	havana	1.46086	8.19711	5.45602	0.0293586
ENSRNOG00000015854	AABR07051831.1	ensembl	9.0586	20.1525	2.23589	0.0294242
ENSRNOG00000003099	Ubqln2	ensembl	1692.88	2038.77	1.20932	0.0295366
ENSRNOG00000008463	Rundc3b	ensembl	1575.67	1230.68	0.785558	0.0295409
ENSRNOG00000007400	Srebf2	ensembl	2439.93	2950.55	1.21468	0.0295796
ENSRNOG00000029778	Maob	ensembl	1830.98	1468.24	0.806219	0.0296669
ENSRNOG00000055330	AABR07039234.1	ensembl	370.466	468.938	1.2726	0.0296995
ENSRNOG00000003732	Flrt2	ensembl	305.447	399.336	1.31042	0.0297212
ENSRNOG00000019666	Ubxn1	ensembl	3223.37	2388.1	0.744872	0.0297275
ENSRNOG00000026297	Serpina16	ensembl	5.63613	0.324507	0.0775589	0.029753
ENSRNOG00000056169	U1	ensembl	0.309084	4.97009	11.163	0.0297775
ENSRNOG00000003291	Creg1	ensembl	468.385	367.911	0.790051	0.0297956
ENSRNOG00000016016	Zmat2	ensembl	3470.3	2507.56	0.726484	0.0298355
ENSRNOG00000014505	Pmfbp1	ensembl	151.752	104.409	0.691773	0.0298438
ENSRNOG00000018326	Pgls	ensembl	182.833	255.404	1.40614	0.0298545
ENSRNOG00000007597	Rhpn1	ensembl_havana	59.0205	95.8441	1.62345	0.029859
ENSRNOG00000014508	Mgll	ensembl	351.975	266.889	0.763166	0.0298661
ENSRNOG00000000954	Rpo1-3	ensembl	620.471	482.36	0.78175	0.0299442
ENSRNOG00000004353	Ppfia2	ensembl	3788.76	3065.83	0.813314	0.0300083
ENSRNOG00000014454	Ap1m1	ensembl	655.637	803.94	1.23111	0.0300101
ENSRNOG00000002917	Sec14l5	ensembl	35.6488	58.9517	1.65105	0.0300227
ENSRNOG00000059363	AC130862.3	ensembl	219.523	132.162	0.605472	0.0300231
ENSRNOG00000010588	Tns2	ensembl	116.269	164.421	1.4194	0.0300261
ENSRNOG00000006487	Casp8ap2	ensembl_havana	2112.7	1724.55	0.820362	0.0300464
ENSRNOG00000001416	Vgf	ensembl	239.012	341.941	1.4327	0.0300667
ENSRNOG00000006226	Cacng2	ensembl	479.076	605.51	1.26997	0.0301157
ENSRNOG00000038480	Ppp1r36	ensembl	695.247	540.285	0.781201	0.0301314
ENSRNOG00000059744	Atxn7l3b	ensembl	4464.66	3634.97	0.818325	0.0301585
ENSRNOG00000011376	Ccdc176	ensembl	434.793	326.333	0.755318	0.0302735
ENSRNOG00000015202	Dnajc5	ensembl	1575.58	1280.74	0.816285	0.0302756
ENSRNOG00000021670	Frem2	ensembl	54.6691	83.6991	1.53895	0.0303064
ENSRNOG00000004730	Meis2	ensembl	1532.61	1222.7	0.801732	0.0303206
ENSRNOG00000017933	Ccdc3	ensembl	10.8677	23.3801	2.16844	0.0303871
ENSRNOG00000001194	Rrp1b	ensembl	152.339	220.156	1.44507	0.0304587
ENSRNOG00000051824	AABR07062766.1	ensembl	44.4566	76.2514	1.7245	0.0304849
ENSRNOG00000015939	Ccdc25	ensembl	4595.36	3534.99	0.773419	0.030519
ENSRNOG00000012934	Arhgef7	ensembl	607.268	785.184	1.29601	0.0305297
ENSRNOG00000019875	Matr3	ensembl	9469.24	7817.91	0.829716	0.0306046
ENSRNOG00000059169	AABR07054554.1	ensembl	18.2443	7.70194	0.425504	0.0306167
ENSRNOG00000013267	Helz2	ensembl	59.4688	90.292	1.52462	0.0306776
ENSRNOG00000020620	Ppp1r32	ensembl	65.5541	117.041	1.78064	0.0306999
ENSRNOG00000001942	Vcsa1	ensembl	0.65731	5.63601	7.21415	0.030725
ENSRNOG00000014605	Lig4	ensembl	871.075	709.059	0.817685	0.0307361
ENSRNOG00000055246	Ncor1	ensembl	5698.79	4705.18	0.829342	0.0307542
ENSRNOG00000018812	Rpp25	ensembl	101.059	61.7841	0.614308	0.0308326
ENSRNOG00000008666	Etl4	ensembl	581.231	741.145	1.28039	0.0308461
ENSRNOG00000053084	Fuz	ensembl	180.571	258.547	1.43353	0.0310146
ENSRNOG00000010116	Leo1	ensembl	3449.31	2726.93	0.794786	0.0310322
ENSRNOG00000059638	7SK	ensembl	0.348226	5.82365	12.6421	0.0310702
ENSRNOG00000012613	F13b	ensembl	6.60597	0.665916	0.115061	0.0310843
ENSRNOG00000020770	Arl4d	ensembl	36.8335	58.2509	1.58515	0.0311145
ENSRNOG00000019766	Exoc8	ensembl	868.792	1069.51	1.23736	0.0311215
ENSRNOG00000030515	Nfasc	ensembl	2571.73	3099.4	1.21015	0.0311376
ENSRNOG00000047957	Traf5	ensembl	30.9609	14.8072	0.486248	0.0311403
ENSRNOG00000007315	Thoc2	ensembl	4336.01	3379.37	0.783442	0.0312594
ENSRNOG00000012864	Ern1	ensembl	375.609	475.146	1.2713	0.0313231
ENSRNOG00000033593	Osbpl9	ensembl	2220.49	1766.25	0.798378	0.0313477
ENSRNOG00000028384	Npepl1	ensembl	86.0105	126.381	1.48183	0.0313685
ENSRNOG00000021037	Spaca4	ensembl	5.45419	0	0.0222339	0.0313699
ENSRNOG00000052445	Kdm7a	ensembl	411.893	515.212	1.25683	0.0314511
ENSRNOG00000060197	AABR07004404.1	ensembl	10.3341	21.8939	2.11472	0.0314705
ENSRNOG00000019724	Ganab	ensembl	1272.04	1539.43	1.21557	0.0314979
ENSRNOG00000039454	Pcdhgb7	ensembl	57.5119	85.8526	1.49996	0.0315407
ENSRNOG00000004165	Prkd1	ensembl	103.176	144.225	1.40538	0.0315925
ENSRNOG00000045680	LOC100911402	ensembl	748.419	593.644	0.797601	0.0315977
ENSRNOG00000007984	Amer1	ensembl_havana	195.769	257.23	1.32107	0.0316753
ENSRNOG00000006962	Stk32c	ensembl	238.562	310.218	1.30641	0.0317397
ENSRNOG00000003773	Hmox2	ensembl	1793.19	1442.19	0.807895	0.0317452
ENSRNOG00000003613	Mid1	ensembl	209.068	152.709	0.734534	0.0317619
ENSRNOG00000047812	Triap1	ensembl	29.9804	60.4625	2.01555	0.0318542
ENSRNOG00000025629	Prpf3	ensembl	1196.78	943.516	0.792714	0.0319222
ENSRNOG00000003809	Sat1	ensembl	2794.03	2198.69	0.791217	0.0319478
ENSRNOG00000007040	Timm17a	ensembl	1080.65	826.88	0.769381	0.0319751
ENSRNOG00000003399	Hnrnph1	ensembl	9179.66	7358.44	0.805457	0.0320252
ENSRNOG00000051710	RGD1559808	ensembl	21.3192	9.58051	0.455313	0.032039
ENSRNOG00000032085	Dlec1	ensembl	16.0748	38.1036	2.35535	0.0321669
ENSRNOG00000010266	Cd180	ensembl	32.4089	53.746	1.66762	0.0322498
ENSRNOG00000046547	Rbm24	ensembl	188.286	251.665	1.34008	0.0322557
ENSRNOG00000059260	AABR07053509.2	ensembl	4.78655	14.6532	3.00558	0.0322589
ENSRNOG00000030812	LOC100361105	ensembl	0	4.88529	40.6852	0.0322629
ENSRNOG00000055580	AABR07010620.1	ensembl	48.2927	75.6874	1.5657	0.0322815
ENSRNOG00000011470	Tsc1	ensembl	702.93	884.236	1.26256	0.0323016
ENSRNOG00000025231	Lrrc29	ensembl	79.3544	113.344	1.43695	0.0323289
ENSRNOG00000014083	Iqsec3	ensembl_havana	1323.31	1649.31	1.25079	0.0323361
ENSRNOG00000060350	Iqsec1	ensembl	1011.94	1235.18	1.2257	0.0323805
ENSRNOG00000029242	Plekho2	ensembl	132.416	177.489	1.34635	0.0323843
ENSRNOG00000049236	Myh9	ensembl	566.446	706.268	1.25447	0.0324309
ENSRNOG00000043192	Hacd1	ensembl	102.543	66.279	0.650093	0.0324527
ENSRNOG00000058136	Vom1r90	ensembl	30.2936	50.9413	1.67753	0.032454
ENSRNOG00000010873	Pithd1	ensembl	3922.06	2958.97	0.757797	0.0324823
ENSRNOG00000003606	AABR07014550.1	ensembl	189.255	264.776	1.4009	0.0325183
ENSRNOG00000006554	Fam149b1	ensembl	752.835	595.486	0.794063	0.0325709
ENSRNOG00000021663	RGD1561849	ensembl	1428.44	1174.48	0.826266	0.0326431
ENSRNOG00000024693	Zfp831	ensembl	120.497	185.246	1.53712	0.0326573
ENSRNOG00000004290	Grb10	ensembl	3454.41	2830.21	0.822507	0.0326755
ENSRNOG00000004257	Ctps2	ensembl	1491.9	1146.66	0.772417	0.0327089
ENSRNOG00000011280	Mllt3	ensembl	1270.99	1034.03	0.817048	0.0327695
ENSRNOG00000019586	Ccdc24	ensembl	6.8753	19.5199	2.75465	0.0327847
ENSRNOG00000010780	Dlc1	ensembl	620.125	779.942	1.2626	0.0327907
ENSRNOG00000005308	Tmx2	ensembl	4049.55	3303.92	0.819955	0.0328517
ENSRNOG00000004392	Aatk	ensembl	819.644	1017.83	1.24663	0.032903
ENSRNOG00000024043	Orc6	ensembl	173.496	97.9839	0.565791	0.0329097
ENSRNOG00000000695	Ssh1	ensembl	104.959	162.514	1.54595	0.0329567
ENSRNOG00000006143	Ngly1	ensembl	689.053	551.162	0.803633	0.0329983
ENSRNOG00000001519	Dlx2	ensembl	35.9826	62.3664	1.7329	0.0330338
ENSRNOG00000039994	Upf3b	ensembl_havana	3209.48	2463.69	0.771326	0.0330684
ENSRNOG00000021714	Fam92b	ensembl	21.9183	38.3231	1.74824	0.0330972
ENSRNOG00000050087	Mphosph6	ensembl	1193.4	800.016	0.674068	0.0331659
ENSRNOG00000008334	Crocc	ensembl	345.037	437.315	1.27245	0.0331868
ENSRNOG00000014571	Dbndd2	ensembl	516.461	656.617	1.27466	0.0333212
ENSRNOG00000050036	AABR07030072.1	ensembl	0	3.50082	29.312	0.0333464
ENSRNOG00000018838	Paox	ensembl	220.274	293.451	1.33521	0.0333831
ENSRNOG00000013165	Bet1l	ensembl	195.378	138.361	0.712111	0.0333929
ENSRNOG00000036833	Zfp385a	ensembl	131.952	179.501	1.36534	0.0334171
ENSRNOG00000037951	Nhsl2	ensembl_havana	282.797	364.318	1.2932	0.0334587
ENSRNOG00000030319	Morn2	ensembl	47.9968	76.4919	1.58954	0.0334782
ENSRNOG00000017949	Mvb12a	ensembl	107.351	149.732	1.39968	0.0335155
ENSRNOG00000022144	LOC100361993	ensembl	511.731	401.706	0.789974	0.0336166
ENSRNOG00000051270	Rn50_5_0814.28	havana	30.0173	15.49	0.521347	0.0336416
ENSRNOG00000017759	Ucn3	ensembl	235.758	305.992	1.30094	0.0337057
ENSRNOG00000022704	Esyt3	ensembl	52.1335	80.3519	1.54065	0.0337835
ENSRNOG00000020626	Snrnp25	ensembl	301.337	219.32	0.730429	0.0337855
ENSRNOG00000057848	Cacng8	ensembl	67.6525	102.871	1.52273	0.0337923
ENSRNOG00000026040	Prss53	ensembl	18.4003	34.0031	1.84573	0.03383
ENSRNOG00000060988	Kcnc4	ensembl	378.321	488.676	1.29756	0.0340061
ENSRNOG00000028430	LOC257650	ensembl	69.1679	111.539	1.6121	0.0340114
ENSRNOG00000017872	LOC688778	ensembl	71.5967	118.712	1.65411	0.0340321
ENSRNOG00000012358	Pcyt1b	ensembl_havana	603.539	459.069	0.763874	0.0340466
ENSRNOG00000005087	Cebpz	ensembl	1969.88	1530.95	0.781124	0.0340729
ENSRNOG00000013304	Arg1	ensembl	415.265	312.159	0.756088	0.0341028
ENSRNOG00000024562	Tgfbrap1	ensembl	455.505	565.429	1.24581	0.034175
ENSRNOG00000027317	Ylpm1	ensembl	2411.86	2879.19	1.19925	0.0341799
ENSRNOG00000017265	Tmem131	ensembl	620.289	763.946	1.23743	0.0342246
ENSRNOG00000022325	Smc2	ensembl	1836.93	1483.87	0.811971	0.0342372
ENSRNOG00000007766	Pqbp1	ensembl	1935.42	1511.14	0.784823	0.0342415
ENSRNOG00000049784	Tsnax	ensembl	2563.94	3063.56	1.20031	0.0342818
ENSRNOG00000048642	LOC100360950	ensembl	31.2271	53.5895	1.70661	0.0342989
ENSRNOG00000056233	AC120262.1	ensembl	18.12	34.9594	1.92948	0.034348
ENSRNOG00000014380	LOC102555672	ensembl	540.051	422.303	0.785781	0.0343908
ENSRNOG00000015297	RGD1561662	ensembl	1.6237	8.41856	4.72828	0.034406
ENSRNOG00000018288	Ncoa6	ensembl	447.361	580.193	1.30155	0.0344406
ENSRNOG00000017571	Ndufa2	ensembl	419.88	313.953	0.750715	0.0345098
ENSRNOG00000058201	U6	ensembl	42.5087	65.4061	1.5438	0.0345998
ENSRNOG00000011652	Sppl2a	ensembl	1348.66	1099.98	0.818941	0.0346417
ENSRNOG00000003762	Smarca1	ensembl	2755.97	2178.89	0.794847	0.0346801
ENSRNOG00000049025	Rps6	ensembl	5290.07	4288.28	0.814836	0.0347213
ENSRNOG00000014674	Exosc9	ensembl	1765.24	1420.81	0.808688	0.0347288
ENSRNOG00000025584	Agap2	ensembl	1554.03	1903.25	1.22978	0.0347605
ENSRNOG00000058861	AABR07039697.1	ensembl	31.9968	14.3973	0.454944	0.0348031
ENSRNOG00000005183	Rtf1	ensembl	954.283	1205.47	1.26881	0.0348128
ENSRNOG00000053991	P3h1	ensembl	59.7849	92.119	1.54244	0.0348149
ENSRNOG00000018761	Eif3c	ensembl	3872.64	3155.68	0.818558	0.0348203
ENSRNOG00000055984	Adrm1	ensembl	548.225	730.739	1.33871	0.0348447
ENSRNOG00000047137	Erbb2ip	ensembl	4244.86	3429.33	0.811752	0.0348809
ENSRNOG00000008703	Rnps1	ensembl	3920.56	3244.86	0.831722	0.0349206
ENSRNOG00000029209	Rnf13	ensembl	2095.85	1718.44	0.82379	0.0349311
ENSRNOG00000051624	AABR07067760.1	ensembl	1198.44	967.804	0.81169	0.0349334
ENSRNOG00000016891	Uimc1	ensembl	1275.59	1029.44	0.811072	0.0350479
ENSRNOG00000014519	Slc35g3	ensembl	23.0406	40.8684	1.77017	0.0350739
ENSRNOG00000021140	Kcnk4	ensembl	15.622	30.0586	1.93869	0.0351323
ENSRNOG00000000665	Pitpnb	ensembl	1288.77	1033.05	0.805665	0.0352489
ENSRNOG00000052758	Fam49a	ensembl	2158.87	2621.27	1.2204	0.0353623
ENSRNOG00000007393	Ndrg1	ensembl	1848.62	2230.61	1.21197	0.0353835
ENSRNOG00000003334	Klhl21	ensembl	113.486	156.005	1.37708	0.0354523
ENSRNOG00000054829	AABR07036640.1	ensembl	0	4.23521	35.0478	0.0354599
ENSRNOG00000004996	Zcrb1	ensembl	1162.29	830.549	0.717605	0.0354707
ENSRNOG00000018898	Mpi	ensembl	500.978	381.256	0.765295	0.0354805
ENSRNOG00000009195	Tnks1bp1	ensembl	962.806	1159.88	1.21024	0.0354973
ENSRNOG00000015133	Kmt2a	ensembl	2234.64	2725.05	1.22514	0.0355092
ENSRNOG00000007092	Fgb	ensembl_havana	0	5.77295	47.47	0.0355123
ENSRNOG00000046258	B3gnt5	ensembl	4.75085	14.7396	3.04565	0.0355384
ENSRNOG00000003653	Fh	ensembl	2327.56	1867.74	0.806595	0.0355405
ENSRNOG00000010158	Magel2	ensembl	140.7	189.083	1.34781	0.0356162
ENSRNOG00000055226	Dab2ip	ensembl	620.992	765.3	1.23663	0.0356966
ENSRNOG00000017248	Prkag3	ensembl	0.65731	8.91574	11.3151	0.0357215
ENSRNOG00000010921	Taf1d	ensembl	1884.55	1509.6	0.805074	0.0358021
ENSRNOG00000011026	Irf2bpl	ensembl	176.599	245.957	1.39533	0.0358294
ENSRNOG00000012166	Adal	ensembl	98.8906	140.467	1.42171	0.0358529
ENSRNOG00000056540	AABR07028776.1	ensembl	5.09908	0.324507	0.0848674	0.0358851
ENSRNOG00000021295	Rae1	ensembl	115.586	171.331	1.48824	0.0358971
ENSRNOG00000014832	Mapkapk3	ensembl	60.4562	90.9035	1.51467	0.0360239
ENSRNOG00000042686	Trim34	ensembl	91.6153	129.829	1.42429	0.0361447
ENSRNOG00000033915	Gpt	ensembl	121.337	170.938	1.41278	0.0363427
ENSRNOG00000002251	Sec31a	ensembl	382.788	480.741	1.26096	0.0363813
ENSRNOG00000033119	Plcb4	ensembl	2964.42	2452.12	0.831419	0.0364771
ENSRNOG00000059141	7SK	ensembl	0	4.85042	40.0099	0.0365175
ENSRNOG00000010149	Cmc1	ensembl	108.473	54.1561	0.4992	0.0365257
ENSRNOG00000046318	Cox11	ensembl	155.482	219.476	1.416	0.0365366
ENSRNOG00000013290	Nrip3	ensembl	3433.41	2767.61	0.810244	0.0365821
ENSRNOG00000015780	Rcn2	ensembl	10173	8232.98	0.813226	0.0366613
ENSRNOG00000014368	Eif4g3	ensembl	2706.67	3254.46	1.20781	0.0367243
ENSRNOG00000047387	LOC100912445	ensembl	859.768	1061.61	1.23859	0.0367331
ENSRNOG00000032703	Rasgrp3	ensembl	762.715	608.49	0.802126	0.0367346
ENSRNOG00000010282	Ninj2	ensembl	32.3766	17.3686	0.541594	0.0367429
ENSRNOG00000013994	Enpp1	ensembl	49.2544	76.815	1.55815	0.0367536
ENSRNOG00000001701	Cbr3	ensembl_havana	36.3953	19.57	0.539078	0.0367706
ENSRNOG00000013867	Fgf1	ensembl	322.09	409.288	1.27545	0.0367746
ENSRNOG00000013228	Scrg1	ensembl	410.858	305.581	0.748576	0.0367862
ENSRNOG00000012534	Mfsd10	ensembl	83.81	128.063	1.52452	0.036799
ENSRNOG00000054698	AABR07066792.1	ensembl	104.002	143.724	1.38372	0.0368111
ENSRNOG00000060665	Afap1	ensembl	191.08	256.571	1.3509	0.0369086
ENSRNOG00000054348	RT1-M10-2-ps	havana	0.618168	5.82308	7.52809	0.0369499
ENSRNOG00000010068	Ppapdc3	ensembl	62.1357	90.5796	1.46562	0.0369592
ENSRNOG00000021644	Slc15a3	ensembl	39.7878	64.4838	1.61259	0.0370152
ENSRNOG00000013851	Spry4	ensembl	109.383	156.931	1.43626	0.0370347
ENSRNOG00000015480	Prkcz	ensembl	882.315	1100.38	1.25152	0.0370447
ENSRNOG00000019869	Lrfn1	ensembl	108.387	155.314	1.43869	0.0370765
ENSRNOG00000004709	Foxn3	ensembl	886.344	1070.97	1.21413	0.0370888
ENSRNOG00000009117	Otub2	ensembl	57.0629	85.0844	1.49486	0.0371227
ENSRNOG00000000314	Sec63	ensembl	1764.29	1421.2	0.810038	0.0372621
ENSRNOG00000005665	AABR07041481.1	ensembl	16.1268	5.97742	0.380397	0.0372886
ENSRNOG00000048795	Top2b	ensembl_havana	3347.66	2721.79	0.816911	0.0373349
ENSRNOG00000012081	Txn1	ensembl	1395.91	1076.75	0.774526	0.0373682
ENSRNOG00000060509	AABR07039233.1	ensembl	210.395	279.88	1.33522	0.0374001
ENSRNOG00000011294	Usp33	ensembl	2600.05	3112.83	1.20247	0.0374039
ENSRNOG00000001551	Atp5j	ensembl	1461.68	1775.1	1.21978	0.0374242
ENSRNOG00000043562	Mir1956	ensembl	0.348226	5.14133	11.3567	0.0374618
ENSRNOG00000011540	Vta1	ensembl_havana	507.174	383.665	0.759932	0.0374659
ENSRNOG00000016507	LOC687679	ensembl	41.6172	24.061	0.580953	0.0375002
ENSRNOG00000059840	Unc5a	ensembl	274.726	369.629	1.3477	0.0375044
ENSRNOG00000002860	Ccdc181	ensembl_havana	3012.36	2390.65	0.797947	0.0375307
ENSRNOG00000004466	Fam210b	ensembl	76.6776	110.341	1.44108	0.0375588
ENSRNOG00000016067	Ckap5	ensembl	6047.62	5053.96	0.839705	0.0375614
ENSRNOG00000036604	Ifit2	ensembl_havana	218.644	296.887	1.36652	0.0376238
ENSRNOG00000009341	Hivep3	ensembl	185.043	244.402	1.32875	0.0376428
ENSRNOG00000058931	AABR07007088.2	ensembl	4.21097	0	0.0287441	0.0376504
ENSRNOG00000055036	RGD1311164	ensembl	604.567	446.516	0.743261	0.0376991
ENSRNOG00000012175	Nfatc2	ensembl	47.129	72.2586	1.54358	0.0377245
ENSRNOG00000003237	Tp53bp2	ensembl	658.05	801.85	1.22389	0.0377698
ENSRNOG00000007532	RGD1305178	ensembl_havana	1458.52	1094.94	0.753847	0.0377741
ENSRNOG00000011951	Plk2	ensembl	1593.81	1295.14	0.815755	0.0378416
ENSRNOG00000039730	Orai3	ensembl	104.431	145.743	1.3982	0.0378754
ENSRNOG00000019361	Inpp5j	ensembl	125.411	174.798	1.39836	0.0379208
ENSRNOG00000009338	Kras	ensembl	912.843	1147.91	1.26402	0.0379348
ENSRNOG00000014867	Synpo2	ensembl	74.5222	141.638	1.90453	0.037957
ENSRNOG00000015476	Ubxn11	ensembl	65.2678	39.3122	0.604085	0.0379978
ENSRNOG00000051344	Psme3	ensembl_havana	340.268	432.138	1.27406	0.0380138
ENSRNOG00000002144	Exoc1	ensembl	1913.97	1567.96	0.823336	0.0381081
ENSRNOG00000008850	Ttc5	ensembl	620.568	461.257	0.747562	0.0381939
ENSRNOG00000021285	Celsr1	ensembl	81.0208	122.241	1.50512	0.0382151
ENSRNOG00000003139	Smc1a	ensembl	11134.9	8883.88	0.802058	0.0382196
ENSRNOG00000034084	Ggct	ensembl	592.727	450.844	0.76565	0.038274
ENSRNOG00000019426	Fam103a1	ensembl	491.346	376.034	0.769634	0.0382925
ENSRNOG00000016697	Lrrc56	ensembl	13.4675	29.3938	2.17443	0.0382985
ENSRNOG00000015913	Tspan5	ensembl	890.415	1093.07	1.23295	0.0383103
ENSRNOG00000011953	Supt16h	ensembl_havana	5636.46	4696.72	0.836852	0.0385104
ENSRNOG00000007663	LOC100911372	ensembl	5234.84	4239.96	0.814234	0.0385156
ENSRNOG00000028834	Polr2a	ensembl	533.634	663.405	1.2502	0.0386326
ENSRNOG00000013653	Pdlim7	ensembl	91.3814	133.253	1.45654	0.0386637
ENSRNOG00000001377	Ddx54	ensembl	189.574	252.363	1.33635	0.0386921
ENSRNOG00000003687	Rgs2	ensembl	722.942	575.576	0.799713	0.038706
ENSRNOG00000039862	Cldn12	ensembl	1246.85	1026.77	0.827516	0.0387226
ENSRNOG00000004415	Fam179b	ensembl	2655.86	3178.2	1.20178	0.0387331
ENSRNOG00000055733	7SK	ensembl	6.00973	0.580832	0.121956	0.0387421
ENSRNOG00000054579	AABR07013689.1	ensembl	1.35032	7.63433	5.21659	0.0387523
ENSRNOG00000009566	Phf12	ensembl	356.947	457.609	1.28631	0.0387901
ENSRNOG00000051947	7SK	ensembl	1.27548	7.37743	5.13529	0.0388134
ENSRNOG00000008592	Barx2	ensembl	219.105	158.773	0.726285	0.0389058
ENSRNOG00000007867	Rngtt	ensembl	997.737	816.172	0.821138	0.0389354
ENSRNOG00000057680	U6	ensembl	5.01391	0.341409	0.0869459	0.0389768
ENSRNOG00000013694	Ntng2	ensembl	5.86977	16.3441	2.69878	0.0390035
ENSRNOG00000055648	Haus7	ensembl	376.016	266.026	0.712029	0.0390409
ENSRNOG00000019697	Ankrd28	ensembl	1399.17	1138.73	0.816745	0.0390622
ENSRNOG00000002341	Trim25	ensembl	53.3558	97.9108	1.83307	0.0390649
ENSRNOG00000001847	Ccdc91	ensembl	1840.43	1449.81	0.791724	0.0391117
ENSRNOG00000058119	Rn50_20_0038.3	havana	0	4.13322	34.3504	0.0391119
ENSRNOG00000042259	Slc22a14	ensembl	13.185	3.70644	0.294411	0.0391604
ENSRNOG00000060603	Nhsl1	ensembl	206.776	270.269	1.3121	0.0392191
ENSRNOG00000009636	Scrn1	ensembl	6615.03	7808.94	1.18567	0.0392616
ENSRNOG00000018885	LOC100910046	ensembl	1246.33	978.052	0.78931	0.0393474
ENSRNOG00000032487	Sts	ensembl	84.1381	120.597	1.44109	0.0393569
ENSRNOG00000047247	Ptprs	ensembl	2401.24	2952.08	1.23421	0.0393745
ENSRNOG00000004199	AABR07062753.1	ensembl	89.7067	133.451	1.49695	0.0395059
ENSRNOG00000008052	Atp13a2	ensembl	681.182	886.098	1.30513	0.0395461
ENSRNOG00000003078	Dcaf6	ensembl	2995.22	2424.59	0.812977	0.0395737
ENSRNOG00000017674	Ctcf	ensembl	1151.53	1403.24	1.22325	0.0396626
ENSRNOG00000061829	7SK	ensembl	102.144	175.89	1.72894	0.0397228
ENSRNOG00000046585	AABR07054370.1	ensembl	256.39	336.558	1.31732	0.0397781
ENSRNOG00000003524	Lrrc59	ensembl	894.432	722.848	0.812109	0.0398082
ENSRNOG00000048186	F2rl3	ensembl	8.95838	20.4598	2.28061	0.0398591
ENSRNOG00000001065	Cyth3	ensembl_havana	381.15	276.427	0.72796	0.0399551
ENSRNOG00000036711	Spn	ensembl_havana	41.1951	18.0997	0.438737	0.0399943
ENSRNOG00000000274	Phyhipl	ensembl	2110.17	2534.76	1.20622	0.0400039
ENSRNOG00000013468	Fam213b	ensembl	114.231	71.0379	0.626153	0.0400319
ENSRNOG00000018719	Cir1	ensembl	1298.63	1619.72	1.25201	0.0400867
ENSRNOG00000016780	RGD1310951	ensembl	1495.35	1195.86	0.804033	0.0401071
ENSRNOG00000027707	Exd2	ensembl	889.97	1077.04	1.21628	0.040112
ENSRNOG00000021181	Sf3b4	ensembl	198.172	135.037	0.683112	0.0401289
ENSRNOG00000018183	Ubr4	ensembl	6015.18	7200.11	1.20239	0.0401444
ENSRNOG00000018665	Bud13	ensembl	601.893	464.184	0.776198	0.0401927
ENSRNOG00000028699	Sco1	ensembl	336.38	432.595	1.2912	0.040193
ENSRNOG00000056610	Cog5	ensembl	393.454	280.009	0.716076	0.0402105
ENSRNOG00000054548	Srpk3	ensembl	28.843	50.3789	1.74031	0.0402645
ENSRNOG00000017063	Fcna	ensembl	6.13343	15.7807	2.54176	0.0402763
ENSRNOG00000025742	Lmnb2	ensembl	131.123	174.551	1.33766	0.04028
ENSRNOG00000018834	Sstr5	ensembl	8.62238	1.63915	0.201181	0.0403019
ENSRNOG00000008513	Rn50_4_0227.1	havana	11.9872	4.08165	0.353148	0.0403395
ENSRNOG00000008578	Cdk16	ensembl	879.104	674.622	0.769513	0.04036
ENSRNOG00000008345	Clcn6	ensembl	1002.46	1207.81	1.21014	0.0403761
ENSRNOG00000015703	Hypk	ensembl	3529.9	2610.21	0.743214	0.0403831
ENSRNOG00000055247	LOC100909481	ensembl	645.919	522.15	0.812379	0.0405174
ENSRNOG00000016655	Pex6	ensembl	179.363	234.404	1.3118	0.0406701
ENSRNOG00000000697	Coro1c	ensembl	2242.39	2674.28	1.19785	0.0407051
ENSRNOG00000002072	Eva1c	ensembl	13.9682	29.9882	2.12374	0.040789
ENSRNOG00000016289	Bmpr1b	ensembl	346.633	270.198	0.781933	0.0408147
ENSRNOG00000015376	Npas1	ensembl	57.8859	35.1102	0.606646	0.0408179
ENSRNOG00000016551	Bcl2l11	ensembl	51.4831	80.6361	1.56564	0.0408877
ENSRNOG00000060368	7SK	ensembl	0	3.5521	29.6034	0.0409526
ENSRNOG00000016000	LOC100911417	ensembl_havana	5250.24	4270.75	0.817579	0.0409786
ENSRNOG00000043114	Tomm7	ensembl	1080.16	1526.73	1.42255	0.0409812
ENSRNOG00000004874	Flrt3	ensembl	872.6	705.553	0.813252	0.0410077
ENSRNOG00000046390	Tceal3	ensembl	2730.59	2125.65	0.782553	0.0410655
ENSRNOG00000036680	Notum	ensembl	26.3606	12.7568	0.488478	0.0410839
ENSRNOG00000003081	Ribc1	ensembl	163.671	107.48	0.658868	0.0411466
ENSRNOG00000020897	Prpf19	ensembl	1256.51	1515.28	1.21055	0.041212
ENSRNOG00000019282	Ubqln1	ensembl	3134.81	3702.38	1.18619	0.0412132
ENSRNOG00000029339	LOC100363268	ensembl	2407.88	1976.82	0.825255	0.0412309
ENSRNOG00000029592	Srsf11	ensembl	3359.78	2634.38	0.787888	0.0412798
ENSRNOG00000016935	Mapk1ip1	ensembl	456.929	573.189	1.25748	0.0412867
ENSRNOG00000051190	Smim20	ensembl_havana	245.689	315.52	1.29035	0.04129
ENSRNOG00000019698	Ssbp4	ensembl	191.702	255.267	1.33586	0.0413516
ENSRNOG00000021680	Setdb2	ensembl	334.601	259.501	0.779394	0.0414508
ENSRNOG00000020239	Capn15	ensembl	87.7758	129.595	1.47977	0.04151
ENSRNOG00000014288	Fn1	ensembl	285.096	397.604	1.4	0.0415675
ENSRNOG00000003041	Smg6	ensembl_havana	1133.97	925.362	0.820222	0.0416064
ENSRNOG00000052761	AC095390.1	ensembl	1.97193	9.46241	4.52147	0.041639
ENSRNOG00000031174	Arnt	ensembl	541.452	421.903	0.783053	0.0416684
ENSRNOG00000053325	Gm28044	ensembl	10.1424	2.61238	0.265142	0.0416706
ENSRNOG00000007678	Zfp263	ensembl	384.03	473.659	1.23845	0.041785
ENSRNOG00000028335	Fat4	ensembl	495.019	612.157	1.24185	0.0417891
ENSRNOG00000013636	Ppil3	ensembl	77.1395	109.822	1.42863	0.0418044
ENSRNOG00000008314	Orc3	ensembl	813.266	626.881	0.774777	0.0419159
ENSRNOG00000020344	Sntb2	ensembl	85.3582	117.46	1.38135	0.0420258
ENSRNOG00000038902	RGD1565641	ensembl	609.468	460.662	0.759459	0.0420295
ENSRNOG00000013456	Ighmbp2	ensembl	196.092	255.654	1.30831	0.0420325
ENSRNOG00000048195	Nudt13	ensembl	56.6927	85.0966	1.50284	0.0420376
ENSRNOG00000004688	Rbfox2	ensembl	2793.19	2320.96	0.835203	0.0420788
ENSRNOG00000026644	Glipr1	ensembl	203.303	150.592	0.745645	0.042089
ENSRNOG00000045639	RGD1560883	ensembl	710.051	582.523	0.824165	0.0421025
ENSRNOG00000016587	Ninj1	ensembl	97.403	147.679	1.52074	0.042119
ENSRNOG00000018603	Carns1	ensembl	39.309	68.2913	1.73049	0.0421376
ENSRNOG00000060367	Rfx7	ensembl	809.715	993.601	1.23244	0.0421954
ENSRNOG00000013714	Snrpd1	ensembl	1611.31	1200.87	0.749262	0.042213
ENSRNOG00000004135	RGD1311745	ensembl	255.149	180.541	0.712774	0.0422398
ENSRNOG00000003545	Uchl5	ensembl	1176.32	930.385	0.795195	0.0422641
ENSRNOG00000018526	Dlg4	ensembl	3041.76	3674.43	1.21331	0.0423528
ENSRNOG00000060594	LOC100911672	ensembl	59.6116	97.2587	1.63428	0.0424124
ENSRNOG00000056756	Actn1	ensembl	476.535	600.601	1.26395	0.0424618
ENSRNOG00000016255	Podxl2	ensembl	3130.1	3858.93	1.23752	0.0424902
ENSRNOG00000019159	Jakmip2	ensembl	1679.07	1345.06	0.804684	0.0424975
ENSRNOG00000046424	LOC100911485	ensembl	1751.44	2084.89	1.19612	0.0425792
ENSRNOG00000007775	Cmpk1	ensembl	2446.02	1918.61	0.787694	0.0426158
ENSRNOG00000004967	Snrpb2	ensembl	1225.17	1016.44	0.833519	0.0426162
ENSRNOG00000019778	Ptrf	ensembl	866.239	1045.02	1.21241	0.0427252
ENSRNOG00000057078	Ddit4	ensembl	52.5792	88.9655	1.69738	0.0427426
ENSRNOG00000024186	Eef1b2	ensembl	6230.68	7399.59	1.19355	0.042844
ENSRNOG00000060596	AABR07001880.1	ensembl	0	3.9107	32.4374	0.0428487
ENSRNOG00000059589	Lmbr1	ensembl	754.231	568.057	0.754853	0.0428599
ENSRNOG00000007445	Asph	ensembl_havana	2766.96	2251.62	0.817265	0.0428749
ENSRNOG00000003822	Slu7	ensembl	3121.86	2510.89	0.8085	0.0429107
ENSRNOG00000048878	Smim24	ensembl	8.83124	1.58844	0.192757	0.0429753
ENSRNOG00000059228	U6	ensembl	3.50763	0	0.0343426	0.042982
ENSRNOG00000020640	Zbtb7b	ensembl	108.108	151.755	1.41552	0.0430758
ENSRNOG00000009683	Sdcbp	ensembl	5379.5	4342.18	0.811489	0.0430824
ENSRNOG00000054080	Cgnl1	ensembl	622.67	758.973	1.22393	0.0430917
ENSRNOG00000008145	Traf3	ensembl	896.037	1078.99	1.20901	0.0431561
ENSRNOG00000001302	Adora2a	ensembl	43.2218	25.0342	0.580283	0.0432498
ENSRNOG00000032546	Dot1l	ensembl	205.987	279.094	1.36211	0.0433191
ENSRNOG00000058915	SNORD45	ensembl	4.75774	0	0.0253901	0.0433923
ENSRNOG00000001071	Higd2al1	ensembl	5.78865	14.7033	2.49825	0.0433968
ENSRNOG00000042201	Efcab2	ensembl	119.78	175.226	1.46891	0.0434219
ENSRNOG00000056574	Tigit	ensembl	6.53113	0.649014	0.115168	0.0434248
ENSRNOG00000011144	Rho	ensembl	2.97747	12.2466	3.95814	0.0434393
ENSRNOG00000031852	Lsamp	ensembl	3933.53	3216.47	0.821829	0.0435379
ENSRNOG00000054689	Cox7b	ensembl_havana	1542.94	1211.06	0.7887	0.0436336
ENSRNOG00000029279	Prss33	ensembl	0	4.62761	38.1776	0.0436781
ENSRNOG00000061825	7SK	ensembl	2.66838	10.8447	3.87676	0.0436853
ENSRNOG00000001849	Mapk1	ensembl	1379.55	1680.34	1.22297	0.0437208
ENSRNOG00000023828	LOC680875	ensembl	27.6458	48.3983	1.74795	0.0437364
ENSRNOG00000004941	Gpn1	ensembl	506.882	367.602	0.72798	0.0437631
ENSRNOG00000013265	Tgfbr2	ensembl	174.884	231.542	1.32867	0.0438252
ENSRNOG00000031706	RGD1563601	ensembl	7324.26	5944.41	0.815612	0.0438291
ENSRNOG00000010630	Prcp	ensembl	363.998	287.789	0.793488	0.043832
ENSRNOG00000005271	Rapgef5	ensembl	1341.21	1087.68	0.814953	0.0438335
ENSRNOG00000018848	Eif1b	ensembl	1015.59	1225.51	1.21185	0.0438869
ENSRNOG00000006770	Brd4	ensembl	407.803	512.286	1.26325	0.0440239
ENSRNOG00000005924	Dstn	ensembl	1073.2	863.087	0.807543	0.044029
ENSRNOG00000005982	C1d	ensembl_havana	677.673	552.103	0.819064	0.0441048
ENSRNOG00000019482	Gnao1	ensembl	2409.47	2924.6	1.21889	0.0441733
ENSRNOG00000000111	Coprs	ensembl	415.27	528.196	1.28027	0.044179
ENSRNOG00000029805	Zfp780b	ensembl	209.397	157.627	0.75648	0.0441903
ENSRNOG00000004564	Lrriq1	ensembl	299.1	379.836	1.27487	0.044221
ENSRNOG00000028113	Whamm	ensembl	184.668	242.144	1.31841	0.0442257
ENSRNOG00000047737	Rpl7a	ensembl	177.25	129.104	0.732319	0.0442688
ENSRNOG00000011174	Fpr1	ensembl	12.2215	4.45744	0.373555	0.0442692
ENSRNOG00000023830	Dnase2	ensembl	290.379	220.999	0.764071	0.0442911
ENSRNOG00000009946	Ldlr	ensembl	1207.67	1448.35	1.20531	0.0443183
ENSRNOG00000052707	Cacna1a	ensembl	647.988	787.089	1.21948	0.0443375
ENSRNOG00000005180	Vstm2a	ensembl	3104.22	2537.28	0.82161	0.0443407
ENSRNOG00000049949	Hapln4	ensembl	268.619	343.545	1.28167	0.044341
ENSRNOG00000033572	AABR07058017.1	ensembl	1.00209	6.98581	6.29579	0.0443478
ENSRNOG00000032919	Zfp105	ensembl	526.07	404.492	0.773088	0.044384
ENSRNOG00000046852	B3gat2	ensembl	301.063	227.146	0.75924	0.0444505
ENSRNOG00000000823	Gcc2	ensembl	6592.08	5492.7	0.837343	0.0445966
ENSRNOG00000058434	Cfap99	ensembl	99.2729	152.611	1.53776	0.044597
ENSRNOG00000006364	Dld	ensembl	5170.78	4199.05	0.815881	0.0446044
ENSRNOG00000049758	Tbc1d16	ensembl	83.7577	121.61	1.45014	0.044624
ENSRNOG00000011108	Tsga13	ensembl	4.24667	15.1323	3.54052	0.0446856
ENSRNOG00000014621	Rab8a	ensembl	1220.01	982.234	0.807806	0.0446951
ENSRNOG00000024272	Ino80d	ensembl	414.37	512.408	1.24307	0.0448259
ENSRNOG00000011461	Ap3m1	ensembl	1228.64	1004.87	0.821076	0.0448582
ENSRNOG00000017671	Rasa3	ensembl_havana	1224.31	1013.75	0.832097	0.0449374
ENSRNOG00000009508	LOC103689977	ensembl	6.82989	16.0193	2.32918	0.044997
ENSRNOG00000025899	Thada	ensembl	826.581	675.926	0.821976	0.0450446
ENSRNOG00000049696	Rsph4a	ensembl	55.6383	83.7811	1.51082	0.0450535
ENSRNOG00000013002	Gpbp1	ensembl	3624.78	2998.57	0.830732	0.0450981
ENSRNOG00000022686	Zdhhc2	ensembl	1054.42	873.363	0.831642	0.0451037
ENSRNOG00000004390	Alx1	ensembl	23.2069	9.13625	0.398106	0.0451047
ENSRNOG00000012176	Rab27b	ensembl	2005.15	1678.73	0.841074	0.0451154
ENSRNOG00000047134	Gtf2f1	ensembl	3652.94	2956.86	0.813672	0.0451182
ENSRNOG00000039204	Pram1	ensembl	67.4762	102.927	1.5272	0.0451182
ENSRNOG00000010230	Fam45a	ensembl	1053.31	830.61	0.79223	0.0453069
ENSRNOG00000008845	Pdrg1	ensembl	1815.74	1461.68	0.808626	0.04542
ENSRNOG00000027711	Usp32	ensembl	4122.94	4876.84	1.18814	0.045424
ENSRNOG00000048152	Myo1b	ensembl	383.585	297.997	0.782196	0.0454251
ENSRNOG00000008738	Tp53i11	ensembl	900.241	1096.84	1.22306	0.0455122
ENSRNOG00000003973	Cyb5r1	ensembl	390.51	486.2	1.25141	0.045517
ENSRNOG00000057378	Clec16a	ensembl	593.665	481.52	0.815103	0.045566
ENSRNOG00000018042	Mrpl48	ensembl	506.454	347.919	0.688708	0.0456757
ENSRNOG00000059903	Thbs3	ensembl	53.8862	86.6882	1.6147	0.0456949
ENSRNOG00000048989	Larp7	ensembl	1263.41	1008.88	0.802556	0.0456976
ENSRNOG00000059402	Itgb1bp1	ensembl	510.318	393.456	0.773415	0.0457059
ENSRNOG00000035572	Mir125a	ensembl	5.83751	0.290416	0.0720753	0.0457358
ENSRNOG00000014712	Zfp39	ensembl	539.789	436.893	0.813024	0.0457592
ENSRNOG00000009987	Akap11	ensembl	13097	11004.6	0.844117	0.0458028
ENSRNOG00000022476	Satl1	ensembl	13.9043	5.10617	0.371926	0.0458493
ENSRNOG00000037146	Ctxn2	ensembl	387.249	294.202	0.763528	0.0459095
ENSRNOG00000000130	Dnajb5	ensembl	294.02	378.285	1.28975	0.0459131
ENSRNOG00000001707	Vwa5b2	ensembl	206.907	269.125	1.30333	0.0461268
ENSRNOG00000025923	LOC103693776	ensembl	205.511	280.709	1.36724	0.0462151
ENSRNOG00000047891	Foxg1	ensembl	20.4299	42.1327	2.05747	0.0463855
ENSRNOG00000019706	Phox2a	ensembl	26.1277	50.415	1.93595	0.0464278
ENSRNOG00000018333	Rbm6	ensembl	3485.6	2865.97	0.82623	0.0464369
ENSRNOG00000002352	Tsen15	ensembl	470.862	374.159	0.799642	0.0464658
ENSRNOG00000055707	AABR07043133.1	ensembl	0	3.5352	29.4811	0.0464727
ENSRNOG00000023521	Map3k10	ensembl	445.951	553.295	1.24493	0.0465265
ENSRNOG00000033763	RGD1307537	ensembl	3.43623	0	0.0348551	0.0465436
ENSRNOG00000028149	Kansl1l	ensembl	1238.08	1026.27	0.833121	0.0465479
ENSRNOG00000004755	Commd9	ensembl	553.67	445.774	0.808163	0.0466459
ENSRNOG00000015211	Sass6	ensembl	55.4364	80.5364	1.45732	0.0466572
ENSRNOG00000060578	SNORD70	ensembl	0.348226	5.31014	11.5303	0.046704
ENSRNOG00000022957	Ctxn3	ensembl	311.542	242.531	0.780975	0.0467117
ENSRNOG00000004201	Rims2	ensembl	6750.88	5546.58	0.825579	0.0468571
ENSRNOG00000048489	AABR07002775.1	ensembl	166.196	122.688	0.743263	0.0468758
ENSRNOG00000008146	Tox2	ensembl	68.3379	106.885	1.57916	0.0468791
ENSRNOG00000060265	AABR07043825.1	ensembl	0	3.39884	28.6579	0.0469438
ENSRNOG00000046748	Mir1912	ensembl	3.51391	14.6553	3.98559	0.0469857
ENSRNOG00000004158	Hdac9	ensembl	502.196	402.476	0.805766	0.0471328
ENSRNOG00000012237	Rdx	ensembl	6581.86	5270.56	0.804861	0.0471523
ENSRNOG00000016152	Dek	ensembl	3737.78	3127.61	0.84099	0.0471928
ENSRNOG00000022252	Kbtbd3	ensembl	426.087	518.854	1.2234	0.047209
ENSRNOG00000007029	Dnaja1	ensembl	8977.2	7487.45	0.838059	0.0472213
ENSRNOG00000013628	Cela2a	ensembl	5.02424	16.2257	3.17577	0.047226
ENSRNOG00000046299	Atp5f1	ensembl_havana	1800.07	1390.01	0.776975	0.0472803
ENSRNOG00000040384	Mir770	ensembl	31.8058	52.2756	1.6542	0.0472839
ENSRNOG00000031816	Nckipsd	ensembl	467.308	576.94	1.23844	0.0473062
ENSRNOG00000031092	Rock1	ensembl	7017.43	5749.24	0.823112	0.0473072
ENSRNOG00000010482	Impa1	ensembl	1318.62	1001.21	0.762439	0.0473134
ENSRNOG00000055758	AABR07009338.1	ensembl	66.9575	30.4133	0.457267	0.0473606
ENSRNOG00000007584	Ehd4	ensembl	551.524	443.082	0.808075	0.0473685
ENSRNOG00000020694	Icam5	ensembl	186.377	248.182	1.33563	0.047388
ENSRNOG00000005434	Sptbn1	ensembl	29978.1	35264.3	1.18204	0.0475178
ENSRNOG00000018621	Leng9	ensembl	68.6981	98.6421	1.44835	0.0475268
ENSRNOG00000009256	Gkn2	ensembl	11.5739	3.5352	0.31112	0.04753
ENSRNOG00000001525	Igsf11	ensembl	410.208	503.76	1.23375	0.0475593
ENSRNOG00000049394	LOC100912599	ensembl_havana	62.7231	99.6119	1.60309	0.0476472
ENSRNOG00000018373	Tln2	ensembl	1322.39	1072.99	0.815849	0.0476823
ENSRNOG00000054786	7SK	ensembl	27.6155	14.5151	0.526884	0.0479896
ENSRNOG00000042478	Adam22	ensembl	2142.23	1687.05	0.790758	0.047992
ENSRNOG00000054557	Lsm14b	ensembl	974.948	797.225	0.820588	0.0480006
ENSRNOG00000004846	Atp6v1c1	ensembl	5531.23	4541.04	0.82527	0.0480198
ENSRNOG00000001392	Lhx5	ensembl	97.4246	132.884	1.36874	0.0481969
ENSRNOG00000007629	Sf3a3	ensembl	2311.17	1919.49	0.834683	0.0482325
ENSRNOG00000013579	LOC100359916	ensembl	7657.79	6330.25	0.830625	0.0482652
ENSRNOG00000039924	Triqk	ensembl	517.602	408.683	0.792609	0.0483753
ENSRNOG00000014259	Mycl	ensembl	106.385	143.179	1.35034	0.0484
ENSRNOG00000011124	AABR07067267.1	ensembl	3880.65	4609.37	1.19293	0.0484631
ENSRNOG00000010903	Crb1	ensembl	38.4938	62.3677	1.61657	0.048528
ENSRNOG00000055298	Vom2r80	ensembl	26.0049	43.156	1.66313	0.048533
ENSRNOG00000014011	Dll4	ensembl	47.4312	69.8657	1.48288	0.0485726
ENSRNOG00000055716	Oscar	ensembl	14.281	3.87632	0.28019	0.0485994
ENSRNOG00000009891	Pcf11	ensembl	4133.68	3403.14	0.827291	0.0486099
ENSRNOG00000023285	Akr1b1-ps2	havana	77.2732	117.595	1.5348	0.0486236
ENSRNOG00000021392	Noc2l	ensembl	412.65	528.352	1.28507	0.0486829
ENSRNOG00000002556	Tsr2	ensembl	3095.73	2583.34	0.838611	0.0487023
ENSRNOG00000038955	MGC105567	ensembl	48.9432	80.2769	1.63993	0.0487071
ENSRNOG00000013972	Pef1	ensembl	365.966	285.859	0.784543	0.0487085
ENSRNOG00000016907	Ppp5c	ensembl	974.862	1232.55	1.2691	0.0488612
ENSRNOG00000008917	Ehbp1	ensembl	2695.1	2243.81	0.836786	0.049005
ENSRNOG00000011093	Ssna1	ensembl	145.519	191.115	1.31908	0.0490102
ENSRNOG00000020294	Scgb1d2	ensembl	0.966394	7.95913	7.18119	0.0490256
ENSRNOG00000009112	Pon2	ensembl	354.391	472.648	1.33974	0.0490573
ENSRNOG00000015655	Ptgfrn	ensembl	241.356	303.521	1.26304	0.0490885
ENSRNOG00000024435	Wbscr17	havana	131.959	180.294	1.37679	0.0492042
ENSRNOG00000017163	Pfkp	ensembl	5817.78	4904.46	0.847003	0.0492235
ENSRNOG00000048719	Dtnbp1	ensembl	352.053	278.074	0.792191	0.0492676
ENSRNOG00000004421	Tmem5	ensembl	814.907	664.378	0.819747	0.0492782
ENSRNOG00000017751	Arl6ip1	ensembl_havana	4235.72	3568.29	0.846502	0.0492787
ENSRNOG00000015030	Tjp2	ensembl	485.125	601.055	1.24369	0.0492866
ENSRNOG00000005350	Pwp1	ensembl	495.636	373.352	0.756979	0.0493069
ENSRNOG00000049743	Gstm5	ensembl	2779.96	2260.23	0.816729	0.0493627
ENSRNOG00000058606	SNORA1	ensembl	9.20484	20.9889	2.2982	0.049429
ENSRNOG00000005496	Ing3	ensembl	392.997	303.342	0.777101	0.0495231
ENSRNOG00000055003	AABR07058815.1	ensembl	0.383926	6.67829	14.0998	0.0496098
ENSRNOG00000009351	Srp68	ensembl	470.63	631.684	1.34884	0.0496552
ENSRNOG00000018012	Tulp4	ensembl	3104.77	3678.22	1.19019	0.0496815
ENSRNOG00000011293	RGD1311747	ensembl	1131.4	889.101	0.790477	0.0497591
ENSRNOG00000056826	Arap2	ensembl_havana	3471.74	2907.89	0.841448	0.0498491
ENSRNOG00000007219	LOC103692716	ensembl	30866	25263.9	0.822695	0.0498896
ENSRNOG00000050817	AABR07065113.1	ensembl	53.2384	82.3193	1.55741	0.0500154
ENSRNOG00000012247	Rab7a	ensembl	3159.83	3729.47	1.18536	0.050133
ENSRNOG00000015290	Tpi1	ensembl	1050.28	855.112	0.818499	0.0501845
ENSRNOG00000003915	Tmem206	ensembl	174.402	226.384	1.30195	0.0501937
ENSRNOG00000013452	Rcn1	ensembl_havana	1453.12	1178.19	0.81537	0.0501985
ENSRNOG00000052222	AABR07071813.1	ensembl	41.4666	22.8655	0.555381	0.0502067
ENSRNOG00000030629	Camkmt	ensembl	154.877	107.431	0.697496	0.0502087
ENSRNOG00000004425	Klhdc1	ensembl	532.615	414.698	0.782574	0.0502119
ENSRNOG00000028864	Olr1193	ensembl	2.42726	10.3675	4.14338	0.0502294
ENSRNOG00000055809	LOC100911769	ensembl	678.25	824.676	1.2219	0.0502689
ENSRNOG00000015987	Rap1gds1	ensembl	3049.47	2544.96	0.8384	0.0502934
ENSRNOG00000004535	Kcng3	ensembl	15.5443	30.3477	1.97354	0.0503614
ENSRNOG00000001482	Gtf2ird2	ensembl_havana	144.457	188.913	1.31447	0.0503884
ENSRNOG00000017941	Optn	ensembl	5218.02	4350.67	0.837982	0.0503892
ENSRNOG00000012620	Syngr3	ensembl	721.522	585.658	0.815264	0.0503989
ENSRNOG00000011937	Sgtb	ensembl	1091.25	858.14	0.788824	0.0504338
ENSRNOG00000022586	Cdk9	ensembl	191.878	265.216	1.3852	0.050444
ENSRNOG00000003232	Slc9a3r1	ensembl	194.748	256.921	1.32292	0.0505987
ENSRNOG00000034198	Wbp5	ensembl	10718.8	8470.58	0.794362	0.0506887
ENSRNOG00000014590	Stk33	ensembl	50.9169	31.6956	0.625166	0.0507212
ENSRNOG00000010189	Rps24	ensembl	660.49	524.98	0.800042	0.0507797
ENSRNOG00000009450	Hcn4	ensembl	192.775	254.048	1.32128	0.0508346
ENSRNOG00000045543	Frat2	ensembl	3.08457	9.64812	3.04143	0.0508888
ENSRNOG00000013589	Cxcl12	ensembl	577.522	700.878	1.21879	0.0509595
ENSRNOG00000016281	Col4a1	ensembl	384.742	503.417	1.3116	0.0510012
ENSRNOG00000015383	Asxl3	ensembl	153	105.847	0.693928	0.0510282
ENSRNOG00000026962	Osbpl8	ensembl	2657.59	2177.47	0.823598	0.0510356
ENSRNOG00000016807	Oat	ensembl	5453.96	4595.29	0.846614	0.0511034
ENSRNOG00000060811	U6	ensembl	0.69301	5.05517	6.39712	0.0511056
ENSRNOG00000005726	Pclo	ensembl	3488.89	4128.72	1.18907	0.0511084
ENSRNOG00000006968	Mrpl19	ensembl	407.412	322.998	0.796521	0.0511815
ENSRNOG00000054591	AABR07030642.1	ensembl	9.45285	2.57858	0.282445	0.0512792
ENSRNOG00000016794	Phyhd1	ensembl	286.753	218.966	0.766303	0.05136
ENSRNOG00000029926	Rpl31l3	ensembl	8.10536	1.58844	0.207693	0.0514399
ENSRNOG00000019983	Mlx	ensembl	1266.55	1026.87	0.81525	0.0514667
ENSRNOG00000024507	AABR07057678.1	ensembl	736.109	593.563	0.809343	0.0514742
ENSRNOG00000008744	Cops2	ensembl	3915.35	3259.45	0.836033	0.051488
ENSRNOG00000008428	Drd2	ensembl	285.579	221.218	0.7771	0.0515037
ENSRNOG00000042374	Tgif2	ensembl	35.9977	55.1427	1.53216	0.0515757
ENSRNOG00000020721	Nme6	ensembl	42.1042	63.6985	1.51819	0.0516086
ENSRNOG00000049341	AABR07009919.1	ensembl	4.40951	0	0.0273295	0.0516091
ENSRNOG00000020277	Cntnap1	ensembl	2002.19	2368.97	1.18814	0.0516109
ENSRNOG00000019712	Cpsf3l	ensembl	592.818	485.55	0.823028	0.0516346
ENSRNOG00000001960	Sult1d1	ensembl	1487.96	1243.93	0.839983	0.0516372
ENSRNOG00000018417	Naa35	ensembl	828.271	591.583	0.718025	0.0517014
ENSRNOG00000003825	Wdr75	ensembl	948.931	759.303	0.804547	0.0517508
ENSRNOG00000006391	Smarcad1	ensembl	2097.81	1669.46	0.800114	0.0517524
ENSRNOG00000030012	Clec4a2	ensembl	0.348226	4.57604	9.99571	0.0518724
ENSRNOG00000010352	Dnajc3	ensembl	1816.82	1485.36	0.82167	0.0518978
ENSRNOG00000061077	U6	ensembl	11.7887	3.79152	0.333631	0.0519605
ENSRNOG00000019556	Cd9	ensembl	787.717	623.007	0.794942	0.0519764
ENSRNOG00000051841	AABR07030568.1	ensembl	0	5.15802	42.4874	0.0520927
ENSRNOG00000008471	Kif21b	ensembl	629.441	780.497	1.2472	0.0521527
ENSRNOG00000003329	Ppm1d	ensembl	224.545	301.119	1.34327	0.0521581
ENSRNOG00000004196	Rps29	ensembl	817.355	629.871	0.77378	0.0521828
ENSRNOG00000012124	Trappc13	ensembl	1605.51	1287.8	0.805702	0.0522016
ENSRNOG00000009617	Exoc7	ensembl	196.417	252.233	1.28811	0.0522546
ENSRNOG00000008360	LOC103692167	ensembl	42.7082	69.5387	1.62505	0.0523053
ENSRNOG00000060922	SNORA17	ensembl	0	3.2614	27.2451	0.0525024
ENSRNOG00000016283	Meig1	ensembl	1.38946	6.8983	4.64643	0.0525039
ENSRNOG00000046275	LOC100910833	ensembl	1523.9	1820.15	1.20017	0.0525088
ENSRNOG00000008748	Pex2	ensembl	329.114	250.344	0.764308	0.0525554
ENSRNOG00000024907	Tnrc6b	ensembl	3304	3873.01	1.17727	0.0525694
ENSRNOG00000032798	Slco3a1	ensembl_havana	235.367	303.078	1.29287	0.0526414
ENSRNOG00000031178	LOC100362054	ensembl	21.1216	8.93257	0.431764	0.0526586
ENSRNOG00000020630	Il9r	ensembl	1.70199	8.94926	4.94471	0.0526873
ENSRNOG00000057716	AABR07025986.2	ensembl	7.29209	16.5145	2.26075	0.0527332
ENSRNOG00000020860	Tdrkh	ensembl	420.762	524.881	1.25212	0.0527599
ENSRNOG00000033791	Apc2	ensembl	1594.34	1918.8	1.20858	0.0527683
ENSRNOG00000046727	Abcc2	ensembl	39.6114	78.6784	1.98142	0.0527693
ENSRNOG00000030355	Mroh1	ensembl	533.974	657.274	1.2363	0.0528498
ENSRNOG00000013180	Ercc3	ensembl	1034.99	1267.6	1.23018	0.0528731
ENSRNOG00000046739	Mir3564	ensembl	0.348226	4.79827	10.5194	0.0528823
ENSRNOG00000018387	Wdr7	ensembl	5835.8	4941.33	0.850761	0.0529016
ENSRNOG00000010050	Stard9	ensembl	603.238	734.155	1.22126	0.052931
ENSRNOG00000029342	Scn7a	ensembl	463.142	362.724	0.787055	0.053038
ENSRNOG00000014463	Uri1	ensembl	868.366	700.779	0.810781	0.0530449
ENSRNOG00000042309	RGD1310049	ensembl	4310.21	3642.94	0.849057	0.0530989
ENSRNOG00000018075	Spcs1	ensembl	668.88	547.555	0.822979	0.0531143
ENSRNOG00000061603	Asxl1	ensembl	379.332	476.211	1.26062	0.0531584
ENSRNOG00000057476	AABR07054045.1	ensembl	1221.57	972.369	0.800404	0.0531719
ENSRNOG00000030364	LOC686074	ensembl	3000.47	2476.31	0.829254	0.0532573
ENSRNOG00000055496	LOC103690166	ensembl	207.257	143.724	0.695115	0.0533025
ENSRNOG00000017730	Psmd1	ensembl	7959.19	6654.66	0.840308	0.0533368
ENSRNOG00000019073	Ikbkb	ensembl	183.573	246.897	1.34753	0.0533933
ENSRNOG00000020233	Rabac1	ensembl	562.566	677.597	1.2091	0.0534982
ENSRNOG00000057601	AABR07044080.2	ensembl	41.4074	68.4646	1.67111	0.0535083
ENSRNOG00000001598	Usp16	ensembl	1321.48	1077.67	0.819554	0.0535703
ENSRNOG00000020985	Atp4a	ensembl	31.0395	50.9419	1.63912	0.0535926
ENSRNOG00000019425	Gabarapl2	ensembl	1191.81	987.81	0.833009	0.0536252
ENSRNOG00000004148	Cdk17	ensembl	1884.07	1579.65	0.842637	0.0536746
ENSRNOG00000016244	Mical2	ensembl	274.193	346.662	1.26875	0.0536762
ENSRNOG00000001767	RGD1562339	ensembl	372.269	298.349	0.805416	0.0536861
ENSRNOG00000051077	Rn50_6_0863.2	ensembl_havana	312.455	238.918	0.770265	0.0538349
ENSRNOG00000054970	SNORD53_SNORD92	ensembl	2.04333	8.52327	4.02053	0.0538606
ENSRNOG00000011668	Nfil3	ensembl	87.9126	119.716	1.36566	0.0538643
ENSRNOG00000015082	Nlrp10	ensembl	2.05021	9.4425	4.38634	0.0539299
ENSRNOG00000017737	Dgkz	ensembl	436.418	570.815	1.31038	0.0539575
ENSRNOG00000001010	Tecpr1	ensembl_havana	1399.7	1694.2	1.21534	0.0539974
ENSRNOG00000016671	Dtna	ensembl	1430.43	1704.65	1.19654	0.0540175
ENSRNOG00000010461	Gpx8	ensembl	122.162	162.152	1.33076	0.0540365
ENSRNOG00000019555	Arap1	ensembl	419.151	526.703	1.26099	0.0540567
ENSRNOG00000009756	Pacsin2	ensembl	1480.46	1227.95	0.833843	0.0540946
ENSRNOG00000004861	Itga4	ensembl_havana	54.2479	78.8304	1.46458	0.0541941
ENSRNOG00000056888	SNORA20	ensembl	27.8879	13.1675	0.481314	0.0542389
ENSRNOG00000027014	Spata31d1d	ensembl	5.87037	16.7532	2.819	0.0542567
ENSRNOG00000004198	Stxbp6	ensembl	1081.17	883.341	0.82177	0.0544014
ENSRNOG00000028521	Plekhm1	ensembl	242.19	316.288	1.3121	0.0544133
ENSRNOG00000000900	Tpst1	ensembl	586.823	475.755	0.814841	0.0544392
ENSRNOG00000010041	Ube2g1	ensembl	534.975	432.492	0.811257	0.0545051
ENSRNOG00000019885	Magi3	ensembl	2839.74	2366.33	0.837326	0.0545222
ENSRNOG00000027582	Dpysl4	ensembl	191.33	260.318	1.36416	0.0545908
ENSRNOG00000020857	Ppfia1	ensembl	1333.04	1097.75	0.827744	0.0546675
ENSRNOG00000012415	Mpc1	ensembl	1231.18	998.747	0.815337	0.0546681
ENSRNOG00000045679	Apoa1	ensembl	6.55994	1.22985	0.20703	0.054777
ENSRNOG00000020188	Trpc2	ensembl	22.9313	42.4704	1.85906	0.0547791
ENSRNOG00000012772	Nqo1	ensembl	226.743	171.409	0.758719	0.0548416
ENSRNOG00000055824	U6	ensembl	7.45838	1.02423	0.146757	0.0548606
ENSRNOG00000003542	Hcfc1r1	ensembl	678.26	497.338	0.736716	0.0548696
ENSRNOG00000052421	AABR07012475.2	ensembl	156.847	202.847	1.29947	0.0548817
ENSRNOG00000001181	Wdr4	ensembl	56.8556	84.0558	1.47739	0.0549132
ENSRNOG00000052697	7SK	ensembl	0	3.38193	28.5194	0.0550225
ENSRNOG00000060726	AABR07072423.1	ensembl	5.91984	0	0.0205841	0.0550903
ENSRNOG00000058476	Mast2	ensembl	988.169	1200.26	1.21878	0.0552325
ENSRNOG00000029582	Lrch2	ensembl	199.916	266.314	1.33962	0.0552346
ENSRNOG00000000463	Col11a2	ensembl_havana	394.319	515.191	1.31194	0.0553469
ENSRNOG00000028014	Cryzl1	ensembl	287.656	215.791	0.755475	0.0554495
ENSRNOG00000038832	Mia2	ensembl	20.5939	6.98639	0.349652	0.0554647
ENSRNOG00000008258	Fnbp1	ensembl	401.941	580.493	1.44787	0.0554905
ENSRNOG00000007356	Chmp3	ensembl	2517.34	2010.22	0.803	0.055575
ENSRNOG00000008399	Dcaf4	ensembl	790.927	635.777	0.808411	0.0555755
ENSRNOG00000008212	Wdr5	ensembl	516.403	419.169	0.815212	0.0555982
ENSRNOG00000020710	Raver1	ensembl	149.743	197.829	1.32669	0.0556173
ENSRNOG00000010421	Wdr91	ensembl	232.582	314.731	1.35964	0.0556644
ENSRNOG00000004591	Alg12	ensembl	263.717	204.79	0.779246	0.0556758
ENSRNOG00000053529	AABR07025757.1	ensembl	82.9398	121.424	1.46199	0.0556802
ENSRNOG00000019122	Sec16a	ensembl	1313.27	1580.83	1.20835	0.0557427
ENSRNOG00000006139	Stx18	ensembl	299.495	385.728	1.29439	0.0557787
ENSRNOG00000021758	Tnpo3	ensembl	1828.03	1495.77	0.822225	0.0558234
ENSRNOG00000014459	Phax	ensembl	3232.41	2592.9	0.806147	0.0560643
ENSRNOG00000022784	AABR07036035.1	ensembl	177.33	126.389	0.71636	0.0560717
ENSRNOG00000014414	Qrfpr	ensembl	37.9599	57.8105	1.53298	0.056105
ENSRNOG00000011672	Tph1	ensembl	30.7266	15.7622	0.517855	0.0561949
ENSRNOG00000052090	7SK	ensembl	6.82017	16.7016	2.4691	0.0562537
ENSRNOG00000005096	Bzw2	ensembl	238.887	185.035	0.777887	0.0562846
ENSRNOG00000017251	Wdr55	ensembl	6441.24	5139.83	0.802355	0.0562922
ENSRNOG00000046744	Ankrd29	ensembl	584.602	479.772	0.82501	0.0562947
ENSRNOG00000011171	Rims3	ensembl	443.93	550.119	1.24665	0.0563244
ENSRNOG00000024671	Dmxl1	ensembl	5667.76	4799.46	0.850674	0.0563587
ENSRNOG00000058041	U7	ensembl	0.348226	4.18393	9.17346	0.0563824
ENSRNOG00000029986	Insr	ensembl_havana	1091.03	1305.47	1.2021	0.0563953
ENSRNOG00000018342	Ctif	ensembl	1038	1264.75	1.22305	0.0564317
ENSRNOG00000002844	Usp27x	ensembl	352.836	434.74	1.23942	0.056436
ENSRNOG00000007283	Erlec1	ensembl	6534.92	5356.96	0.823226	0.0564656
ENSRNOG00000022174	AABR07021086.1	ensembl	3.983	0	0.0300443	0.0565538
ENSRNOG00000006992	Rpl7	ensembl	6778.09	5771.22	0.855444	0.0565856
ENSRNOG00000059997	Brip1	ensembl	94.0611	65.8004	0.702096	0.0566126
ENSRNOG00000002585	Cul4b	ensembl	1782.31	1453.65	0.819964	0.0566158
ENSRNOG00000016364	Gba2	ensembl	825.156	1009.63	1.22723	0.0566254
ENSRNOG00000029115	RGD1564883	ensembl	456.378	345.475	0.762008	0.0566449
ENSRNOG00000028908	Eppin	ensembl	63.1139	98.1143	1.55777	0.0567161
ENSRNOG00000043436	Micu1	ensembl	1270.96	1047.38	0.827285	0.0567263
ENSRNOG00000048650	LOC103690175	ensembl	589.894	421.295	0.716173	0.0567389
ENSRNOG00000051490	Plcg1	ensembl	1560.76	1839.87	1.18376	0.0568591
ENSRNOG00000003269	Atp6v0e1	ensembl	263.917	330.458	1.25724	0.0568963
ENSRNOG00000018384	Adam12	ensembl	27.0584	43.8214	1.62825	0.0569168
ENSRNOG00000017900	rnf141	ensembl	346.946	456.362	1.31947	0.0569895
ENSRNOG00000010964	Akap13	ensembl	939.258	1135.28	1.21399	0.0570077
ENSRNOG00000033176	Zrsr2	ensembl	3413.06	2625.67	0.773482	0.057034
ENSRNOG00000004019	Phlda1	ensembl	68.9417	102.002	1.48289	0.057082
ENSRNOG00000004346	Notch3	ensembl	85.8395	116.761	1.36905	0.0571117
ENSRNOG00000011785	Xrn2	ensembl	1838.64	1425.76	0.77947	0.0571164
ENSRNOG00000019365	Ablim3	ensembl	209.409	293.195	1.40229	0.057128
ENSRNOG00000040284	Rnf224	ensembl	0.309084	5.72245	12.9432	0.0571509
ENSRNOG00000005124	Plekhh2	ensembl	241.671	309.621	1.28533	0.0571532
ENSRNOG00000002373	Akap1	ensembl	310.366	399.064	1.28926	0.0572234
ENSRNOG00000008984	Irak1bp1	ensembl	453.006	369.39	0.819522	0.0573672
ENSRNOG00000010601	Srpk2	ensembl_havana	6064.43	4989.75	0.827032	0.0573824
ENSRNOG00000016123	Rnf144b	ensembl	346.459	429.813	1.24585	0.0574599
ENSRNOG00000052004	Txnl4a	ensembl	1007.68	838.121	0.835887	0.0575243
ENSRNOG00000021536	Plxdc1	ensembl	61.1176	95.5544	1.56203	0.0576551
ENSRNOG00000003965	Amelx	ensembl	6.63134	16.3449	2.47988	0.0576873
ENSRNOG00000002314	LOC678813	ensembl_havana	1255.52	1507.12	1.20604	0.057735
ENSRNOG00000007467	Ace3	ensembl	231.828	299.589	1.29468	0.057786
ENSRNOG00000007644	Mbtps2	ensembl	312.767	384.251	1.23355	0.0578195
ENSRNOG00000014661	Zfp385d	ensembl	436.352	346.902	0.798257	0.0579431
ENSRNOG00000001062	Setd8	ensembl	78.3498	107.058	1.3697	0.0579693
ENSRNOG00000046961	AABR07041057.1	ensembl	4.30775	16.2064	3.73844	0.0579944
ENSRNOG00000023372	Odam	ensembl_havana	0.383926	5.99518	12.7066	0.0580317
ENSRNOG00000056275	AABR07052298.1	ensembl	0	3.21069	26.8748	0.0580473
ENSRNOG00000061267	AABR07052322.1	ensembl	0	3.97996	33.3259	0.0581551
[truncated: 20,773 more rows]
