# Supplementary material for: A preliminary study of the effect of a high-salt diet on transcriptome dynamics in rat hypothalamic forebrain and brainstem cardiovascular control centers
Source: PeerJ. 2020 Mar 3;8:e8528. doi: 10.7717/peerj.8528 (PMC7059759; doi:10.7717/peerj.8528)
Supplement: Table S6 [file peerj-08-8528-s006.xlsx]

## Sheet: S6_RVLM_SRSvsSHS
Supplemental Table S6: RNAs-Seq datasets for RVLM
	GeneName	GeneType	DESeq.shrRS.AvgCount	DESeq.shrHS.AvgCount	edgeR.foldChange	edgeR.PValue
ENSRNOG00000010149	Cmc1	ensembl	206.421	82.9709	0.407818	1.65e-07
ENSRNOG00000046390	Tceal3	ensembl	522.301	987.762	1.91866	8.87e-07
ENSRNOG00000020994	Slc25a39	ensembl	313.546	600.802	1.93588	1.12e-05
ENSRNOG00000030812	LOC100361105	ensembl	114.135	0	0.00107764	1.63e-05
ENSRNOG00000013250	Pdcd5	ensembl	955.372	487.729	0.52003	7.43e-05
ENSRNOG00000049020	Tceal6	ensembl	1777.52	1025.63	0.586658	0.000108314
ENSRNOG00000019381	Eri3	ensembl	367.76	636.505	1.74868	0.000116339
ENSRNOG00000057641	AC133613.1	ensembl	28.1735	8.8166	0.320655	0.000187535
ENSRNOG00000010090	Ccdc174	ensembl	668.697	380.092	0.578245	0.000202863
ENSRNOG00000045860	U2af1	ensembl	921.772	483.86	0.534048	0.000287907
ENSRNOG00000028545	Ahnak2	ensembl	1970.68	3154.54	1.6235	0.000296891
ENSRNOG00000023935	Nrsn2	ensembl	623.18	1040.55	1.69273	0.000332182
ENSRNOG00000031960	LOC102548369	ensembl	694.547	340.388	0.498779	0.000415567
ENSRNOG00000010816	Kcnk15	ensembl	120.405	33.8646	0.284926	0.000444658
ENSRNOG00000057862	Rsph1	ensembl	4.75846	18.6813	3.92331	0.000517317
ENSRNOG00000006471	Pvalb	ensembl	4685.37	2681.46	0.579809	0.000530315
ENSRNOG00000024309	Cox6b1	ensembl	1556.66	887.656	0.580811	0.000546682
ENSRNOG00000057322	Efna3	ensembl	53.874	114.257	2.14374	0.000555452
ENSRNOG00000001854	Tmtc1	ensembl	737.747	1163.82	1.59714	0.000603792
ENSRNOG00000012995	Gpr165	ensembl_havana	1066.95	1607.41	1.52945	0.000677276
ENSRNOG00000056639	LOC103694557	ensembl	0.393178	6.13315	13.1	0.000713734
ENSRNOG00000012392	Dnajc2	ensembl	1164.19	748.412	0.653317	0.000719007
ENSRNOG00000007882	Ablim2	ensembl	1381.75	2262.03	1.65552	0.000779241
ENSRNOG00000004155	Samd14	ensembl	122.825	215.184	1.7829	0.000806603
ENSRNOG00000005123	Emc2	ensembl	2042.12	1272.45	0.633101	0.000933707
ENSRNOG00000029859	AABR07021384.1	ensembl	582.097	328.115	0.574042	0.000953881
ENSRNOG00000025300	Fer1l6	ensembl	7.06771	22.5518	3.23616	0.00105124
ENSRNOG00000012081	Txn1	ensembl	1163.88	689.564	0.601748	0.00117875
ENSRNOG00000013030	Pip4k2b	ensembl	843.892	1325.13	1.58686	0.00118043
ENSRNOG00000001177	Acads	ensembl	104.974	178.147	1.71403	0.00122227
ENSRNOG00000029366	Prrt2	ensembl	2117.64	3112.06	1.48902	0.00129677
ENSRNOG00000008428	Drd2	ensembl	240.607	372.974	1.57522	0.00132429
ENSRNOG00000019183	Alox15	ensembl	20.3371	4.40354	0.219337	0.00134953
ENSRNOG00000019435	Psd	ensembl	435.719	709.053	1.65035	0.0014018
ENSRNOG00000004144	AABR07001435.1	ensembl	157.918	81.9492	0.529171	0.00142139
ENSRNOG00000001396	Mospd3	ensembl	113.606	193.227	1.71975	0.001439
ENSRNOG00000004476	Wif1	ensembl	29.7653	61.1662	2.06869	0.00147001
ENSRNOG00000030319	Morn2	ensembl	73.9548	38.8335	0.533289	0.00147231
ENSRNOG00000037540	Tmem256	ensembl_havana	351.642	148.693	0.432524	0.00148241
ENSRNOG00000003457	Ccdc64b	ensembl	1.86543	9.68807	5.14575	0.0015187
ENSRNOG00000046899	AABR07031972.1	ensembl	212.048	80.1235	0.387689	0.00152472
ENSRNOG00000010526	Dennd1a	ensembl	238.334	372.958	1.5878	0.0015475
ENSRNOG00000038228	Serp2	ensembl	327.903	523.447	1.61124	0.00156752
ENSRNOG00000019838	Gmfg	ensembl	78.2404	25.9299	0.33944	0.00168184
ENSRNOG00000027767	Slc38a5	ensembl	21.3416	47.5813	2.23151	0.00172988
ENSRNOG00000035594	Mirlet7d	ensembl	14.6931	33.9149	2.31889	0.00174676
ENSRNOG00000005249	Snx6	ensembl	848.476	1314	1.56438	0.00197266
ENSRNOG00000054097	AABR07004232.2	ensembl	6.26558	18.3041	2.94555	0.00212313
ENSRNOG00000009613	Sh3bgrl2	ensembl	243.592	140.185	0.585976	0.00215528
ENSRNOG00000015320	Atp5g2	ensembl	1470.8	2503.64	1.72459	0.0022731
ENSRNOG00000020355	Twist2	ensembl	0	4.16536	35.1749	0.00227339
ENSRNOG00000043035	Fbxl13	ensembl	4.33207	14.5546	3.30692	0.0022759
ENSRNOG00000033502	Ribc2	ensembl	2.96111	12.0429	4.00773	0.00241688
ENSRNOG00000042086	Rab26	ensembl	194.584	311.591	1.6183	0.00245535
ENSRNOG00000046057	Pnmt	ensembl	71.1701	159.036	2.2655	0.00251054
ENSRNOG00000004889	Vangl2	ensembl	177.135	289.824	1.65324	0.00253748
ENSRNOG00000009736	A4galt	ensembl	22.0796	50.1749	2.32206	0.00262141
ENSRNOG00000038437	AABR07060746.1	ensembl	123.807	60.8022	0.501038	0.00264332
ENSRNOG00000020212	LOC302999	ensembl	28.4433	53.672	1.89718	0.00270141
ENSRNOG00000029443	Rps29	ensembl	889.364	587.438	0.670685	0.00274215
ENSRNOG00000001115	Slc29a4	ensembl	242.047	425.293	1.77394	0.00275303
ENSRNOG00000027864	Ppia	ensembl_havana	1962.66	1238.6	0.642382	0.00284328
ENSRNOG00000056687	Rn50_5_1085.1	havana	6.40008	0.338466	0.067176	0.00288472
ENSRNOG00000054493	Rmrp	ensembl	4905.6	10037	2.06641	0.00290993
ENSRNOG00000016412	Fxyd6	ensembl	334.894	507.404	1.53862	0.00299515
ENSRNOG00000034031	Vstm2l	ensembl	74.0448	143.38	1.9502	0.00302591
ENSRNOG00000011445	Nkain1	ensembl	38.9181	90.7929	2.3624	0.00308061
ENSRNOG00000027990	Crip1	ensembl	39.5726	13.9754	0.3564	0.00308646
ENSRNOG00000014452	Zfhx3	ensembl	535.442	761.183	1.44077	0.00312324
ENSRNOG00000011262	Gltscr1	ensembl	35.3156	67.2621	1.91378	0.00317541
ENSRNOG00000019859	Pla2g15	ensembl	97.0706	158.991	1.659	0.00317709
ENSRNOG00000004554	Dcn	ensembl	447.575	270.48	0.60981	0.00321428
ENSRNOG00000005620	Lcp2	ensembl	243.443	106.548	0.443645	0.00326306
ENSRNOG00000012879	Fabp3	ensembl	975.009	667.188	0.693857	0.0032642
ENSRNOG00000011647	S100a6	ensembl	262.696	130.765	0.501267	0.00329114
ENSRNOG00000056349	U2	ensembl	50.747	22.918	0.4594	0.00335445
ENSRNOG00000035613	Mir7a-1	ensembl	8.95603	24.2778	2.68251	0.00337563
ENSRNOG00000057042	Pcca	ensembl	334.913	586.803	1.77004	0.00343564
ENSRNOG00000008075	Ift74	ensembl	1057.45	677.036	0.650956	0.00355823
ENSRNOG00000058929	SNORA67	ensembl	0.719106	5.89989	7.2315	0.0035684
ENSRNOG00000020699	Cd37	ensembl	6.45618	18.4009	2.82084	0.00357147
ENSRNOG00000059160	AABR07050399.1	ensembl	37.6454	17.2598	0.461443	0.00361133
ENSRNOG00000038074	LOC498555	ensembl	1163.51	708.822	0.620264	0.0036437
ENSRNOG00000018358	Nt5dc2	ensembl	260.64	382.65	1.48967	0.00366899
ENSRNOG00000050215	LOC682408	havana	65.6014	30.9811	0.485101	0.0036915
ENSRNOG00000018273	Ncl	ensembl_havana	5508.01	3726.82	0.687428	0.00372238
ENSRNOG00000057023	AABR07036374.2	ensembl	25.6129	9.47417	0.38001	0.00381889
ENSRNOG00000050165	AABR07069587.1	ensembl	14.5366	4.61744	0.320946	0.00392665
ENSRNOG00000054459	Mboat7	ensembl	70.6194	118.015	1.6912	0.00401089
ENSRNOG00000021735	Akr1cl	ensembl	303.835	190.224	0.634291	0.00408007
ENSRNOG00000058096	AABR07021704.1	ensembl	119.206	191.14	1.61834	0.00415989
ENSRNOG00000059827	LOC691995	ensembl	1665.48	2432.95	1.4799	0.00416071
ENSRNOG00000011226	Timm8a1	ensembl	651.806	414.672	0.646548	0.00418472
ENSRNOG00000015534	Cnep1r1	ensembl	413.339	603.71	1.47714	0.00425652
ENSRNOG00000027233	Trpc5	ensembl	381.318	548.659	1.46204	0.00429768
ENSRNOG00000053929	RNaseP_nuc	ensembl	1406.5	2404.06	1.7275	0.00431479
ENSRNOG00000017836	Rrp36	ensembl	124.706	212.085	1.72502	0.00435216
ENSRNOG00000000065	Pde6b	ensembl	31.8858	5.81056	0.187529	0.0044748
ENSRNOG00000051850	SCARNA2	ensembl	529.882	761.589	1.45569	0.00449573
ENSRNOG00000052420	AABR07034980.1	ensembl	0.393178	5.08999	11.0141	0.00468413
ENSRNOG00000020792	Etv4	ensembl	64.8205	113.476	1.76554	0.00468481
ENSRNOG00000013169	Traf4	ensembl	113.892	179.457	1.59401	0.00468505
ENSRNOG00000050983	Hpcal4	ensembl	340.343	511.236	1.52236	0.00483049
ENSRNOG00000012521	Shisa2	ensembl	8.61433	20.4967	2.37603	0.00489624
ENSRNOG00000055428	AABR07060963.1	ensembl	30.5024	0.676931	0.0252122	0.00507021
ENSRNOG00000018066	Bccip	ensembl	1017.33	677.221	0.676826	0.00533331
ENSRNOG00000009967	Otof	ensembl	22.3724	47.5767	2.1602	0.00541007
ENSRNOG00000015201	Tmem266	ensembl	63.9094	104.323	1.65914	0.00556209
ENSRNOG00000054031	LOC102549726	havana	122.465	226.194	1.86727	0.00576273
ENSRNOG00000007334	Ly6h	ensembl_havana	180.176	331.443	1.85445	0.00580041
ENSRNOG00000006383	Atoh1	ensembl	5.495	16.891	3.05874	0.00585143
ENSRNOG00000010320	Efnb3	ensembl	163.565	262.386	1.61934	0.00586318
ENSRNOG00000036598	LOC685933	ensembl	807.341	510.137	0.642649	0.00588861
ENSRNOG00000059660	AABR07065531.5	ensembl	245.548	417.013	1.71397	0.00610487
ENSRNOG00000034139	Lyc2	ensembl	89.7479	41.3286	0.46268	0.00631112
ENSRNOG00000008569	Ndufa6	ensembl	2110.64	1406.09	0.675844	0.00645323
ENSRNOG00000016446	Gpr45	ensembl	56.7728	93.2077	1.66161	0.00647781
ENSRNOG00000030726	Asgr2	ensembl	118.399	52.7571	0.447563	0.00648353
ENSRNOG00000056694	Gm26965	ensembl	11.4393	2.5976	0.242341	0.00649669
ENSRNOG00000016714	Nrap	ensembl	30.6948	54.4735	1.79922	0.00655671
ENSRNOG00000011967	Nphp4	ensembl	67.4036	110.807	1.67163	0.00666009
ENSRNOG00000027645	Syndig1l	ensembl	49.6876	83.7683	1.71312	0.00667163
ENSRNOG00000015140	Trmt13	ensembl	172.075	101.724	0.603543	0.00674714
ENSRNOG00000007920	Ssbp3	ensembl	278.224	442.832	1.60966	0.00682738
ENSRNOG00000008572	Ppcs	ensembl	246.691	156.333	0.643451	0.00691739
ENSRNOG00000017893	Baiap3	ensembl	289.292	446.144	1.56841	0.0071595
ENSRNOG00000005814	Katnbl1	ensembl	241.921	134.165	0.564156	0.00733107
ENSRNOG00000037911	LOC680227	ensembl_havana	2.87726	11.2003	3.81377	0.00735835
ENSRNOG00000042387	Slc25a6	ensembl	427.919	278.345	0.660822	0.00738148
ENSRNOG00000008585	RGD1306626	ensembl	0.702502	5.92418	7.13676	0.00746593
ENSRNOG00000014302	Dlgap3	ensembl	309.751	484.241	1.5844	0.00748544
ENSRNOG00000049437	Gpc1	ensembl	1369.52	1959.19	1.44716	0.00752502
ENSRNOG00000011817	Rpl22l1	ensembl	456.958	246.924	0.550136	0.0075974
ENSRNOG00000033893	Cacna1h	ensembl	132.008	206.992	1.58354	0.0076027
ENSRNOG00000002871	Rbm25l1	ensembl	1805.43	1280.17	0.720177	0.00760367
ENSRNOG00000004723	Fcf1	ensembl	598.329	368.664	0.627202	0.00760578
ENSRNOG00000058832	AABR07063873.1	ensembl	8.15391	1.75389	0.229917	0.00761022
ENSRNOG00000047250	Gmfb	ensembl	735.758	1271.81	1.75242	0.00761936
ENSRNOG00000009265	Kcnk9	ensembl	818.367	1149.99	1.42381	0.00769641
ENSRNOG00000042786	Vti1a	ensembl	600.722	396.427	0.670838	0.00771923
ENSRNOG00000007455	Tmem132e	ensembl_havana	169.51	255.837	1.53365	0.00774522
ENSRNOG00000001628	Pcp4	ensembl	5904.05	4261.73	0.730715	0.007749
ENSRNOG00000008605	Ost4	ensembl	775.409	1248.91	1.62367	0.0077665
ENSRNOG00000022664	Kat7	ensembl	1569.01	2295.62	1.47993	0.00781082
ENSRNOG00000016100	Tbca	ensembl	269.517	179.716	0.675387	0.00784614
ENSRNOG00000024435	Wbscr17	havana	93.2117	149.796	1.62762	0.00797142
ENSRNOG00000032471	Asb3	ensembl	550.44	386.937	0.712473	0.00801806
ENSRNOG00000000610	Cisd1	ensembl	1796.77	1155.46	0.653197	0.00807172
ENSRNOG00000035583	Mir3546	ensembl	3.66361	11.4564	3.16832	0.00810038
ENSRNOG00000009364	Ndufb9	ensembl	4999.33	3489.37	0.708207	0.00811173
ENSRNOG00000010797	Esm1	ensembl	53.5043	21.2113	0.400166	0.00812422
ENSRNOG00000006591	Fam163b	ensembl	230.891	349.797	1.53402	0.00820561
ENSRNOG00000010158	Magel2	ensembl	48.2777	87.255	1.81298	0.00821903
ENSRNOG00000007410	Dab1	ensembl	437.918	603.174	1.39654	0.00824297
ENSRNOG00000013670	Pax3	ensembl	22.1279	41.7959	1.89396	0.00830878
ENSRNOG00000062071	Rn60_1_1883.1	havana	57.0221	26.231	0.474976	0.00833409
ENSRNOG00000043031	Rd3l	ensembl	19.6495	6.282	0.323456	0.00864427
ENSRNOG00000054142	Slc30a2	ensembl	0.719106	5.10332	6.22166	0.00865482
ENSRNOG00000012038	Htr1d	ensembl	22.0212	41.6936	1.89773	0.00869778
ENSRNOG00000061423	AABR07019091.1	ensembl	0.769751	5.24232	6.43156	0.00872559
ENSRNOG00000056678	Nckap5l	ensembl	64.6702	116.158	1.8157	0.00880148
ENSRNOG00000021063	Grin2d	ensembl	77.9981	129.586	1.6846	0.00882216
ENSRNOG00000020132	Ttll10	ensembl	0.393178	6.87546	14.2049	0.00885481
ENSRNOG00000037757	Fam26f	ensembl	0	4.18964	34.7727	0.0089979
ENSRNOG00000058391	7SK	ensembl	1.11228	6.07999	5.13148	0.00905124
ENSRNOG00000010547	Foxb1	ensembl	23.7695	44.9448	1.89857	0.00907708
ENSRNOG00000005630	AABR07060778.1	ensembl	2763	1975.96	0.726156	0.00908824
ENSRNOG00000003211	Srp9	ensembl	1274.15	855.191	0.682272	0.00915077
ENSRNOG00000054767	LOC252890	ensembl	4.62479	0.252619	0.0875739	0.00915284
ENSRNOG00000058470	Col12a1	ensembl	578.999	377.233	0.659218	0.00945934
ENSRNOG00000018286	Chrna1	ensembl	5.88818	15.2871	2.59976	0.00947206
ENSRNOG00000002919	Gfap	ensembl	18107.2	13507	0.755952	0.00962903
ENSRNOG00000028997	RGD1561671	ensembl	39.845	16.1441	0.410049	0.00974612
ENSRNOG00000019414	Tmem79	ensembl_havana	28.4591	49.9986	1.77251	0.00977704
ENSRNOG00000023122	Apol11a	ensembl	35.9416	15.6048	0.442471	0.00978803
ENSRNOG00000008689	Cbx1	ensembl	496.754	321.737	0.65745	0.0101342
ENSRNOG00000057527	RNase_MRP	ensembl	2074.45	3590.8	1.74618	0.0102381
ENSRNOG00000000767	Olfr94-ps1	havana	5.85497	14.968	2.54748	0.01028
ENSRNOG00000054444	RNaseP_nuc	ensembl	0	3.5162	29.9158	0.0102967
ENSRNOG00000043388	Irf3	ensembl	462.359	659.112	1.44144	0.0103507
ENSRNOG00000019584	Dlk1	ensembl	94.4354	155.461	1.67013	0.010408
ENSRNOG00000020492	Rps27a-ps12	ensembl	526.721	333.139	0.643607	0.0104664
ENSRNOG00000025889	Gnas	ensembl	1656.14	2232.04	1.36537	0.0104927
ENSRNOG00000061171	AABR07027431.1	ensembl	0	3.85958	31.9447	0.0105386
ENSRNOG00000049829	Igkc	ensembl	37.5544	6.42941	0.17532	0.0107289
ENSRNOG00000042501	RGD1564379	ensembl	293.978	466.407	1.59976	0.0107351
ENSRNOG00000050794	Pdlim4	ensembl	78.8569	131.293	1.67365	0.0107438
ENSRNOG00000020832	C2cd4d	ensembl	15.8394	6.06063	0.387426	0.0109438
ENSRNOG00000019321	Cck	ensembl	17.8851	42.2796	2.36607	0.0110435
ENSRNOG00000018685	AABR07028237.1	ensembl	3129.34	4589.15	1.48033	0.0110603
ENSRNOG00000009072	AABR07056013.1	ensembl	272.772	402.747	1.49105	0.0111415
ENSRNOG00000061254	AABR07015042.1	ensembl	394.508	822.223	2.0947	0.0111439
ENSRNOG00000030016	Robo3	ensembl	2.38279	10.3748	4.01328	0.0112631
ENSRNOG00000025025	Dnttip2	ensembl	1551.67	1089.92	0.713972	0.0112908
ENSRNOG00000046566	Tub	ensembl	373.904	530.319	1.44026	0.0114342
ENSRNOG00000008312	Stra6	ensembl	55.5539	26.6447	0.48241	0.0115315
ENSRNOG00000058827	Six2	ensembl	0.325929	5.16632	10.9447	0.011601
ENSRNOG00000025059	Nxph4	ensembl	233.204	356.583	1.54378	0.0116196
ENSRNOG00000020546	Lipe	ensembl	213.935	323.095	1.52405	0.0116207
ENSRNOG00000021067	Fxyd7	ensembl	1050.48	1413.23	1.36508	0.0116822
ENSRNOG00000060499	AABR07027377.1	ensembl	0	4.75882	39.3471	0.0117223
ENSRNOG00000021269	Chgb	ensembl	11080.2	8213.49	0.752098	0.0117732
ENSRNOG00000015975	LOC497940	ensembl	74.1637	44.8421	0.614604	0.0117827
ENSRNOG00000014635	Clta	ensembl	7929.59	5690.02	0.728901	0.0118381
ENSRNOG00000014626	Katnb1	ensembl	346.584	480.571	1.4061	0.0118759
ENSRNOG00000057955	U2	ensembl	37.628	18.7394	0.506085	0.011888
ENSRNOG00000031052	LOC100362751	ensembl	754.503	459.693	0.62146	0.0120142
ENSRNOG00000056717	U2	ensembl	53.2065	24.597	0.472646	0.0120431
ENSRNOG00000061116	AABR07044671.1	ensembl	0.393178	4.31769	9.08225	0.0120873
ENSRNOG00000011016	Slc7a2	ensembl	367.609	256.836	0.708585	0.0121645
ENSRNOG00000020636	Spint2	ensembl	107.966	162.864	1.5245	0.0123457
ENSRNOG00000013092	Lonrf3	ensembl	580.449	406.777	0.711142	0.0123502
ENSRNOG00000057760	Stil	ensembl	44.6032	90.8824	2.0734	0.0123685
ENSRNOG00000027432	R3hdml	ensembl	20.7063	9.43545	0.464159	0.012391
ENSRNOG00000058694	Alg5	ensembl	274.031	178.858	0.662478	0.0125088
ENSRNOG00000033573	Sgk2	ensembl	31.6331	54.5	1.75971	0.0125137
ENSRNOG00000008410	Cep63	ensembl	863.794	610.525	0.717781	0.0125312
ENSRNOG00000019132	Fv1	ensembl	339.734	500.44	1.48569	0.0125326
ENSRNOG00000019350	Lyzl4	ensembl	7.88977	1.09632	0.163315	0.0125814
ENSRNOG00000025948	RGD1311892	ensembl	5.55193	15.3983	2.68229	0.0125838
ENSRNOG00000010457	Vash1	ensembl	105.495	166.377	1.59414	0.0125997
ENSRNOG00000024142	Arglu1	ensembl_havana	1424.58	991.435	0.707139	0.0127636
ENSRNOG00000029427	Grhl3	ensembl	27.4353	55.7074	2.04458	0.0127709
ENSRNOG00000007336	Churc1	ensembl	329.453	191.209	0.590892	0.012806
ENSRNOG00000038459	Ulk3	ensembl	65.966	105.476	1.61565	0.0128626
ENSRNOG00000019035	Trpm8	ensembl	39.4556	66.4555	1.71732	0.0130677
ENSRNOG00000051858	LOC103690796	ensembl	42.6113	20.047	0.482786	0.0130696
ENSRNOG00000011175	Hnrnpa2b1	ensembl	3461.7	2377.32	0.695903	0.0131005
ENSRNOG00000060452	U4	ensembl	0.376573	5.26406	11.0077	0.0132369
ENSRNOG00000004457	RGD1560617	ensembl	641.841	454.186	0.717728	0.0133424
ENSRNOG00000008482	Rbms1	ensembl	459.521	322.07	0.710659	0.013384
ENSRNOG00000004706	Vit	ensembl	5.19196	15.0078	2.81357	0.0134036
ENSRNOG00000019532	Emc10	ensembl	571.172	892.731	1.57758	0.0134897
ENSRNOG00000014358	Zic5	ensembl	52.8925	27.9514	0.531714	0.0135111
ENSRNOG00000026203	Pax8	ensembl	78.4246	129.881	1.68607	0.0135122
ENSRNOG00000016275	Ttr	ensembl	1103.01	237.199	0.218981	0.0135426
ENSRNOG00000011503	Shb	ensembl	163.055	263.813	1.6292	0.0135688
ENSRNOG00000052256	Dact3	ensembl	718.166	1034.46	1.45597	0.0135905
ENSRNOG00000018529	Csnk1g2	ensembl	968.753	1301.49	1.35914	0.0138213
ENSRNOG00000006623	Cd302	ensembl	1471.14	1065.59	0.734663	0.0139659
ENSRNOG00000049982	Pex26	ensembl	157.869	238.949	1.52735	0.0140252
ENSRNOG00000061666	U1	ensembl	0.753147	5.08396	6.15413	0.0141003
ENSRNOG00000052074	AABR07072876.1	ensembl	31.9738	13.3953	0.42108	0.0141039
ENSRNOG00000054689	Cox7b	ensembl_havana	1900.17	1357.74	0.725805	0.0141171
ENSRNOG00000017837	Znf48	ensembl	145.198	218.855	1.52028	0.014124
ENSRNOG00000027514	Ube2m	ensembl	1063.99	1741.67	1.64899	0.0141258
ENSRNOG00000003606	AABR07014550.1	ensembl	538.4	376.644	0.7071	0.0141645
ENSRNOG00000038483	Tnfrsf10b	ensembl	20.492	9.06811	0.442456	0.0142937
ENSRNOG00000021447	Prr7	ensembl	8.38969	20.9707	2.51611	0.0144171
ENSRNOG00000016206	Uvrag	ensembl	1421.83	994.869	0.709529	0.0144254
ENSRNOG00000054116	SNORA17	ensembl	5.72047	1.16281	0.224936	0.0144783
ENSRNOG00000042380	Znf442	ensembl	109.147	65.8646	0.613699	0.0145142
ENSRNOG00000017071	Babam1	ensembl	962.797	1293.66	1.36219	0.0145477
ENSRNOG00000058767	AABR07053169.1	ensembl	12.0081	26.9696	2.21227	0.0146147
ENSRNOG00000035532	Mir101b	ensembl	0	3.15488	26.3406	0.0146208
ENSRNOG00000026488	Gltpd2	ensembl	253.712	127.384	0.513257	0.0146371
ENSRNOG00000017438	Gfra1	ensembl	589.895	802.342	1.38075	0.0147042
ENSRNOG00000001032	Ccz1b	ensembl_havana	811.454	577.646	0.72235	0.0148046
ENSRNOG00000026653	Hcar2	ensembl	6.37233	15.6351	2.42451	0.0149102
ENSRNOG00000060054	Doc2b	ensembl	26.3802	45.9653	1.76971	0.0149276
ENSRNOG00000018198	Dapk1	ensembl	232.499	325.189	1.42015	0.0149401
ENSRNOG00000005166	Nhlh1	ensembl	0	4.7336	39.6203	0.0151195
ENSRNOG00000018201	Prok1	ensembl	8.27726	22.8465	2.68385	0.0152687
ENSRNOG00000054374	RGD1564450	ensembl	239.412	357.032	1.50596	0.015294
ENSRNOG00000009068	Phlda3	ensembl	349.622	487.789	1.41028	0.0153046
ENSRNOG00000010100	Tyw5	ensembl	107.615	166.099	1.55856	0.0153567
ENSRNOG00000007048	Rap1b	ensembl	836.994	576.326	0.69896	0.0154971
ENSRNOG00000023657	Gprin3	ensembl	195.333	272.695	1.41608	0.0155201
ENSRNOG00000043332	Foxd1	ensembl	25.7537	11.4796	0.446102	0.0155894
ENSRNOG00000008191	Hoxb4	ensembl	270.975	182.587	0.683534	0.0156454
ENSRNOG00000061910	Igfbp3	ensembl	170.421	76.5352	0.451294	0.0157548
ENSRNOG00000021097	Hpn	ensembl	13.5476	5.02842	0.380647	0.0158097
ENSRNOG00000061709	U6	ensembl	9.60872	20.7517	2.13804	0.0158387
ENSRNOG00000016213	Ssbp2	ensembl	545.736	839.836	1.55913	0.0159516
ENSRNOG00000021855	Kcp	ensembl	21.6366	41.612	1.96899	0.0159564
ENSRNOG00000007784	Bloc1s1	ensembl	254.141	164.933	0.658478	0.0159681
ENSRNOG00000051943	LOC102547817	ensembl	11.7431	23.0496	1.99104	0.0162207
ENSRNOG00000030332	Ighg	ensembl	15.0629	0.591085	0.0476839	0.0162352
ENSRNOG00000020902	G6pc3	ensembl	298.34	470.978	1.59243	0.0163651
ENSRNOG00000056324	LOC102548818	ensembl	3.83132	0	0.0320815	0.0164715
ENSRNOG00000042502	Smim17	ensembl	1301.27	1697.45	1.3213	0.0165415
ENSRNOG00000011182	Aanat	ensembl	14.3855	5.60855	0.400489	0.0165839
ENSRNOG00000062068	Rn60_10_0565.6	havana	0.702502	5.72709	6.87189	0.0165853
ENSRNOG00000021435	AC141966.1	ensembl	120.234	202.013	1.6913	0.0166071
ENSRNOG00000060912	Qars	ensembl	1365.39	980.234	0.725693	0.0166105
ENSRNOG00000046343	AABR07067896.1	ensembl	19.3362	45.9092	2.36686	0.016795
ENSRNOG00000059798	U6	ensembl	0	2.9167	25.1325	0.017057
ENSRNOG00000026646	Ndufs5	ensembl	204.466	139.486	0.692464	0.0171034
ENSRNOG00000033119	Plcb4	ensembl	3519.05	2630.78	0.759072	0.017107
ENSRNOG00000051993	Gdf10	ensembl	4.00698	12.0235	2.95132	0.017114
ENSRNOG00000043288	Smim13	ensembl	202.049	128.494	0.647616	0.0171258
ENSRNOG00000061004	Asphd2	ensembl	90.8048	149.835	1.66461	0.0171554
ENSRNOG00000007369	Shisa4	ensembl	1666.02	2394.98	1.45086	0.0173489
ENSRNOG00000033143	Cep295nl	ensembl	21.0915	8.93513	0.427585	0.017416
ENSRNOG00000050234	AABR07036648.1	ensembl	1.74754	6.68552	3.62184	0.0174582
ENSRNOG00000014882	Fgf11	ensembl	1026.71	1372.32	1.35338	0.0174995
ENSRNOG00000053311	AABR07065139.1	ensembl	4.95072	0.657572	0.143644	0.0175105
ENSRNOG00000023765	Nyap2	ensembl	323.254	456.267	1.42617	0.0175604
ENSRNOG00000018785	Slc16a13	ensembl	178.066	255.422	1.44844	0.0175725
ENSRNOG00000028235	RGD1560795	ensembl	30.5974	58.9672	1.92898	0.0175899
ENSRNOG00000052129	Nwd1	ensembl	465.258	628.987	1.36709	0.0176202
ENSRNOG00000009163	Fam133b	ensembl	333.189	207.034	0.63279	0.0176458
ENSRNOG00000026065	Slit1	ensembl	213.439	313.232	1.49446	0.0177513
ENSRNOG00000028513	RGD1560523	ensembl	846.832	611.489	0.733282	0.0177675
ENSRNOG00000051175	Rn50_X_0740.2	havana	0.786355	6.30136	7.4955	0.0178101
ENSRNOG00000001493	Kptn	ensembl	313.574	431.199	1.39413	0.0180317
ENSRNOG00000020115	Ilkap	ensembl	734.586	530.006	0.7336	0.0180412
ENSRNOG00000038512	Uts2b	ensembl	43.5385	103.001	2.39565	0.0180574
ENSRNOG00000032063	Gfral	ensembl	26.9988	45.5043	1.7169	0.0180807
ENSRNOG00000000435	Ppt2	ensembl_havana	113.371	175.944	1.56864	0.018343
ENSRNOG00000060312	AABR07002972.1	ensembl	519.936	249.494	0.488819	0.0184029
ENSRNOG00000000964	AABR07036087.1	ensembl	1155.76	744.942	0.65659	0.0184554
ENSRNOG00000017012	Coq7	ensembl_havana	451.579	314.346	0.707955	0.0184873
ENSRNOG00000006565	Fstl4	ensembl	19.4121	36.8356	1.92921	0.0185616
ENSRNOG00000048795	Top2b	ensembl_havana	2137.62	1567.79	0.745104	0.0186038
ENSRNOG00000051707	SNORA40	ensembl	11.7946	4.09887	0.365575	0.0187008
ENSRNOG00000017887	Mutyh	ensembl	23.2679	39.3726	1.71324	0.01874
ENSRNOG00000003542	Hcfc1r1	ensembl	548.801	753.956	1.39328	0.0188922
ENSRNOG00000012957	Sh3glb1	ensembl	1991.07	1452.14	0.739975	0.0189168
ENSRNOG00000049906	Foxf1	ensembl_havana	6.64761	15.9409	2.37002	0.0192706
ENSRNOG00000007881	Mtmr14	ensembl	180.706	260.946	1.46583	0.0193395
ENSRNOG00000001953	Bace2	ensembl	206.843	133.404	0.654856	0.0193454
ENSRNOG00000008140	Rpl15	ensembl	2341.6	1705.89	0.740045	0.0193914
ENSRNOG00000009741	Cyp4a2	ensembl	0.393178	4.4229	9.24893	0.0195288
ENSRNOG00000052386	Nlrx1	ensembl	153.773	214.948	1.41591	0.0197973
ENSRNOG00000006394	Tbc1d10a	ensembl	117.38	175.456	1.50949	0.0198071
ENSRNOG00000003463	Srebf1	ensembl	839.671	1172.03	1.41022	0.0198416
ENSRNOG00000025757	Myh6	ensembl	144.499	206.633	1.44927	0.0198855
ENSRNOG00000009144	Lad1	ensembl	8.09697	2.41147	0.312586	0.0199259
ENSRNOG00000010489	Samd4a	ensembl	945.164	1233.78	1.32302	0.0200255
ENSRNOG00000001353	Ap4m1	ensembl	77.1268	123.425	1.61274	0.020037
ENSRNOG00000020373	Dap3	ensembl	560.967	375.965	0.681134	0.0200429
ENSRNOG00000053790	AABR07036007.1	ensembl	218.146	416.211	1.9192	0.0201208
ENSRNOG00000032639	Foxo6	ensembl	3.57893	10.3699	2.82137	0.0201739
ENSRNOG00000011494	LOC100912182	ensembl	328.186	222.304	0.688786	0.0202693
ENSRNOG00000030445	Ormdl3	ensembl	222.02	342.186	1.55073	0.0202816
ENSRNOG00000005247	Surf1	ensembl	202.099	126.677	0.631712	0.0204756
ENSRNOG00000058980	AABR07059495.1	ensembl	3.3875	0	0.0359384	0.0204894
ENSRNOG00000010783	Mak16	ensembl	528.573	364.733	0.701456	0.0205131
ENSRNOG00000013118	Atox1	ensembl	146.148	222.988	1.54586	0.0206315
ENSRNOG00000004196	Rps29	ensembl	499.445	341.715	0.696989	0.0206632
ENSRNOG00000008025	Bend5	ensembl	184.232	120.845	0.667054	0.0208946
ENSRNOG00000054737	SNORD50	ensembl	7.911	17.3601	2.17598	0.0209453
ENSRNOG00000021438	Tuba1c	ensembl	1875.12	2723.47	1.46831	0.0210607
ENSRNOG00000007743	Mgst1	ensembl	623.722	900.604	1.45564	0.0211891
ENSRNOG00000039025	AABR07051947.1	ensembl	84.4877	127.759	1.53832	0.021198
ENSRNOG00000011453	Kif6	ensembl	22.2237	38.2424	1.7373	0.0212453
ENSRNOG00000046983	Adat2	ensembl	41.8027	23.1946	0.570429	0.021265
ENSRNOG00000047632	LOC683422	ensembl	4.29886	11.6862	2.70216	0.021311
ENSRNOG00000010379	Celf1	ensembl	601.537	790.142	1.32936	0.0213678
ENSRNOG00000025589	Jph4	ensembl	214.242	302.571	1.43249	0.0213835
ENSRNOG00000054609	AABR07002683.1	ensembl	74.0298	114.381	1.55633	0.0213885
ENSRNOG00000060810	SNORA55	ensembl	1.47225	7.10634	4.58591	0.0214534
ENSRNOG00000012255	Ktn1	ensembl	6331.26	4834.66	0.774789	0.0215596
ENSRNOG00000001389	Irs3	ensembl	22.1279	10.4896	0.478538	0.021565
ENSRNOG00000015816	Bbs7	ensembl	385.098	276.109	0.727342	0.021648
ENSRNOG00000008761	Ncs1	ensembl	6054.32	7827.64	1.30847	0.0216794
ENSRNOG00000056703	Atrx	ensembl_havana	5336.62	4031.52	0.76662	0.0217361
ENSRNOG00000020093	LOC100360573	ensembl	2475.85	1741.27	0.71384	0.021787
ENSRNOG00000029278	LOC102554602	ensembl	7.06854	1.5484	0.232339	0.0217908
ENSRNOG00000012510	Olr1627	ensembl	0	4.14251	34.7393	0.0218777
ENSRNOG00000055887	AABR07056643.2	ensembl	2.85982	0	0.0412498	0.0219933
ENSRNOG00000014585	Cfap53	ensembl	76.9617	33.5874	0.445762	0.0220354
ENSRNOG00000056257	Cacng7	ensembl	1466.95	2219.71	1.5272	0.0221667
ENSRNOG00000005587	Suclg1	ensembl	3698.78	2811.91	0.7709	0.0223188
ENSRNOG00000010117	Eif3a	ensembl	8773.64	6566.47	0.759977	0.0223401
ENSRNOG00000011363	Napepld	ensembl	205.81	138.974	0.685317	0.0225056
ENSRNOG00000011323	Lgi3	ensembl	4556.43	6498.85	1.44142	0.0225114
ENSRNOG00000019704	Resp18	ensembl	984.545	1488.02	1.52719	0.0225202
ENSRNOG00000009336	Mapk15	ensembl	6.07332	15.2122	2.5691	0.0225974
ENSRNOG00000033176	Zrsr2	ensembl	1294.42	875.614	0.687839	0.0226273
ENSRNOG00000019568	Jund	ensembl	1464.03	2207.54	1.52606	0.0226448
ENSRNOG00000027006	Hnrnpa3	ensembl	996.971	722.741	0.736485	0.0226649
ENSRNOG00000046150	AABR07008805.1	ensembl	0	3.37481	29.1089	0.0227898
ENSRNOG00000023356	Eif5b	ensembl	507.894	350.844	0.70326	0.0228715
ENSRNOG00000042721	Gimd1	ensembl	0.786355	5.46606	6.46282	0.0229395
ENSRNOG00000027480	Tmem116	ensembl	3.56232	10.9743	2.96319	0.0229771
ENSRNOG00000058077	AABR07001068.1	ensembl	90.0198	137.566	1.54143	0.0229792
ENSRNOG00000011718	C1rl	ensembl	11.5588	23.2346	2.00162	0.0231337
ENSRNOG00000025764	AC128848.1	ensembl	10.755	21.0685	1.96176	0.0231792
ENSRNOG00000054795	AABR07041096.2	ensembl	457.307	307.943	0.683207	0.0232356
ENSRNOG00000005705	Qpct	ensembl	199.031	286.026	1.45037	0.0232913
ENSRNOG00000034233	Fyttd1	ensembl	1342.76	933.47	0.704366	0.0232921
ENSRNOG00000031769	Chchd7	ensembl	98.6869	62.6338	0.638966	0.0233231
ENSRNOG00000014783	Athl1	ensembl	62.2351	96.4486	1.56019	0.0233491
ENSRNOG00000009993	Dcps	ensembl	148.245	226.399	1.54388	0.0233604
ENSRNOG00000054517	SNORA33	ensembl	17.8576	8.292	0.477102	0.0234138
ENSRNOG00000015544	LOC100909441	ensembl	1865.19	2711.61	1.4694	0.0234316
ENSRNOG00000052038	Haus8	ensembl	103.992	67.1968	0.654471	0.0234494
ENSRNOG00000028085	Tmem255a	ensembl	1488.83	1961.32	1.33556	0.0234591
ENSRNOG00000016414	Slc22a17	ensembl	3499.09	4835.65	1.39726	0.0235885
ENSRNOG00000037967	Thap7	ensembl	135.615	200.121	1.49581	0.0236236
ENSRNOG00000001808	Asun	ensembl	847.634	620.526	0.744115	0.0236451
ENSRNOG00000021032	Sphk2	ensembl	450.838	659.461	1.47753	0.0237261
ENSRNOG00000059515	AABR07048966.1	ensembl	2.32586	10.0811	4.3909	0.0237975
ENSRNOG00000005960	RGD1311744	ensembl	1560.25	2062.42	1.34252	0.0238028
ENSRNOG00000032994	Myom3	ensembl	182.292	107.531	0.595269	0.0238365
ENSRNOG00000029425	AABR07021022.1	ensembl	2.39939	8.31136	3.25377	0.0239961
ENSRNOG00000002146	Pkd2	ensembl	993.116	740.383	0.756439	0.0241542
ENSRNOG00000049695	Myh2	ensembl	292.872	178.575	0.614992	0.024155
ENSRNOG00000019240	Ampd2	ensembl	941.992	1289.68	1.38473	0.0242455
ENSRNOG00000021882	Tmed9	ensembl	1658.12	1191.65	0.730797	0.024299
ENSRNOG00000019184	Npr3	ensembl	18.1258	36.3072	2.02683	0.0243464
ENSRNOG00000013018	Eda2r	ensembl_havana	9.8113	20.2659	2.06789	0.0244287
ENSRNOG00000060153	Spry3	ensembl	70.3376	110.101	1.57983	0.0245902
ENSRNOG00000048172	Rac3	ensembl	107.389	177.177	1.66041	0.0247907
ENSRNOG00000004426	Rps27a	ensembl	1324.57	899.506	0.691218	0.0247943
ENSRNOG00000058938	Camkv	ensembl	306.224	422.094	1.40186	0.024857
ENSRNOG00000020129	Cdh3	ensembl	9.96786	22.5818	2.27727	0.0248785
ENSRNOG00000054091	SNORA38	ensembl	127.237	261.798	2.07108	0.024969
ENSRNOG00000021268	LOC681292	ensembl	16.5428	30.0641	1.81373	0.025016
ENSRNOG00000001333	Azgp1	ensembl	2.65179	8.41657	3.21271	0.0251469
ENSRNOG00000001260	Nudt1	ensembl	38.5614	20.6502	0.548809	0.0252771
ENSRNOG00000058120	Tinag	ensembl	5.37711	1.07696	0.235818	0.0253908
ENSRNOG00000051569	Kcnn2	ensembl	40.2053	69.0775	1.72198	0.0254355
ENSRNOG00000016327	Mcee	ensembl	390.266	279.568	0.728392	0.0255922
ENSRNOG00000017209	Tubb3	ensembl_havana	11562.8	15135.1	1.32536	0.0256488
ENSRNOG00000021018	Batf2	ensembl	0	2.73057	23.1972	0.0256658
ENSRNOG00000030351	AABR07006627.1	ensembl	1435.07	1008.06	0.713327	0.0256947
ENSRNOG00000052695	LOC102549869	ensembl	4.14064	11.1749	2.74568	0.0257692
ENSRNOG00000055412	AABR07034455.1	ensembl	0.702502	6.09332	7.32758	0.0257976
ENSRNOG00000011745	Psma1	ensembl	1166.9	1661.4	1.44064	0.0258381
ENSRNOG00000020317	RGD1307752	ensembl	855.726	1119.33	1.32276	0.0258692
ENSRNOG00000019831	Samd4b	ensembl	404.34	565.573	1.41503	0.0259782
ENSRNOG00000001143	Cit	ensembl	1038.72	1406.98	1.37449	0.026028
ENSRNOG00000052831	AABR07040629.1	ensembl	303.759	183.728	0.61432	0.026043
ENSRNOG00000022448	Htra2	ensembl	110.403	166.42	1.52668	0.0261493
ENSRNOG00000024036	Fam98c	ensembl	66.2762	99.7942	1.51815	0.0261896
ENSRNOG00000059976	U2	ensembl	35.1859	19.8828	0.57193	0.0261964
ENSRNOG00000011238	Tiparp	ensembl	463.056	339.661	0.742997	0.0262096
ENSRNOG00000053651	SNORA2	ensembl	6.59151	1.73453	0.287215	0.0263398
ENSRNOG00000053601	AABR07040127.1	ensembl	10.9133	22.8079	2.06377	0.0263587
ENSRNOG00000012961	Klf7	ensembl	18.7524	7.90641	0.432846	0.0263819
ENSRNOG00000007955	Timp4	ensembl	871.541	1133.03	1.31592	0.0263985
ENSRNOG00000004484	Commd5	ensembl	177.257	118.529	0.678825	0.0264872
ENSRNOG00000017136	Syt17	ensembl_havana	134.772	189.885	1.42402	0.0265424
ENSRNOG00000022804	Foxp4	ensembl	56.7884	100.793	1.78232	0.0265606
ENSRNOG00000021016	Ntn5	ensembl	1.09568	5.23629	4.41139	0.0265743
ENSRNOG00000058105	Hbb	ensembl	1536.64	2291.92	1.50399	0.0266815
ENSRNOG00000013654	Cbln2	ensembl	588.28	775.792	1.33787	0.0266861
ENSRNOG00000030910	Grik4	ensembl	444.161	587.756	1.34171	0.0267255
ENSRNOG00000012259	Il22ra2	ensembl	10.6309	20.5875	1.95413	0.026872
ENSRNOG00000010880	Gpr27	ensembl	20.6817	36.2116	1.77027	0.0269367
ENSRNOG00000061081	U2	ensembl	92.1905	50.5722	0.558266	0.0270389
ENSRNOG00000054458	Kcnmb4	ensembl	191.587	298.155	1.58145	0.027107
ENSRNOG00000009499	Hinfp	ensembl	90.8756	133.267	1.48411	0.0271563
ENSRNOG00000003251	B3galt2	ensembl	1102	828.367	0.760525	0.02725
ENSRNOG00000007294	Sntg1	ensembl	282.909	382.735	1.3733	0.0272772
ENSRNOG00000009412	Lrch1	ensembl	365.754	510.098	1.41865	0.0272782
ENSRNOG00000025731	LOC100359583	ensembl	8995.35	6292.2	0.710526	0.0273064
ENSRNOG00000022807	Pced1b	ensembl	24.0614	41.6522	1.74828	0.0273211
ENSRNOG00000020851	Aplp1	ensembl	17412.8	23629.1	1.37283	0.0273685
ENSRNOG00000019692	Metrn	ensembl	194.597	292.242	1.51265	0.0275238
ENSRNOG00000050819	Birc5	ensembl	18.7325	8.73075	0.481106	0.0275606
ENSRNOG00000006364	Dld	ensembl	5562.36	4261.32	0.777241	0.0276642
ENSRNOG00000053557	LOC102553386	ensembl	954.51	1278.48	1.35361	0.0276921
ENSRNOG00000036263	Mir495	ensembl	3.33768	9.16347	2.77345	0.0277582
ENSRNOG00000047098	LOC103694857	ensembl	127.019	259.582	2.04419	0.0278305
ENSRNOG00000019075	Stat5b	ensembl	461.085	604.015	1.32754	0.0279337
ENSRNOG00000023208	RGD1309821	ensembl	485.493	659.438	1.37145	0.0279382
ENSRNOG00000009324	Wdr54	ensembl	89.2877	136.104	1.53521	0.0279653
ENSRNOG00000009207	Spata2	ensembl	335.042	463.921	1.39936	0.0280575
ENSRNOG00000039668	Col8a1	ensembl	116.906	69.224	0.595457	0.0281048
ENSRNOG00000037661	Tmsbl1	ensembl	148.948	73.3019	0.502301	0.0281071
ENSRNOG00000019729	Jmjd8	ensembl	269.465	372.662	1.3984	0.0281074
ENSRNOG00000007585	Hoxb8	ensembl	0	5.305	45.2124	0.0281224
ENSRNOG00000019719	Kcna5	ensembl	37.606	61.5976	1.66604	0.0281664
ENSRNOG00000012641	Sfr1	ensembl	1359.71	1014.67	0.757984	0.0281819
ENSRNOG00000015772	AC097890.1	ensembl	2000.78	1442.82	0.732376	0.0283836
ENSRNOG00000048574	RGD1563378	ensembl	2.12411	9.03779	4.00384	0.0284448
ENSRNOG00000061129	Psmd14	ensembl	2685.65	1986.97	0.751355	0.0284698
ENSRNOG00000008264	Fndc8	ensembl_havana	7.05111	14.9353	2.16132	0.028566
ENSRNOG00000049761	Htr6	ensembl	8.71396	19.6883	2.27181	0.0285966
ENSRNOG00000003260	Nr1i3	ensembl	412.911	558.168	1.36586	0.0286081
ENSRNOG00000031065	Rn50_20_0045.3	havana	0.753147	5.90227	7.01421	0.0286666
ENSRNOG00000058750	LOC103693015	ensembl	129.963	191.545	1.48567	0.0287222
ENSRNOG00000005054	Prox2	ensembl	9.63564	19.2371	2.04487	0.028777
ENSRNOG00000045929	Spatc1l	ensembl	4.65883	12.7874	2.71452	0.02878
ENSRNOG00000007918	Tbxas1	ensembl	29.5896	16.1741	0.562722	0.0288729
ENSRNOG00000001251	Grifin	ensembl	8.31046	19.0099	2.25229	0.0289166
ENSRNOG00000057774	RGD1560212	ensembl	1366.46	1038.32	0.770602	0.0289443
ENSRNOG00000037219	RGD1562492	ensembl	0.325929	3.50779	7.69099	0.0290429
ENSRNOG00000051263	Rn50_14_0488.1	havana	10.282	2.74993	0.281699	0.0291092
ENSRNOG00000006426	Syt1	ensembl	12259.4	9346.24	0.772997	0.0291281
ENSRNOG00000029078	Hmgn5b	ensembl	56.1179	30.1645	0.547683	0.0291453
ENSRNOG00000019551	Psmb6	ensembl	212.02	130.854	0.630888	0.0293563
ENSRNOG00000003880	Tph2	ensembl	616.932	386.838	0.634187	0.029416
ENSRNOG00000013057	Prc1	ensembl	76.0852	49.8402	0.665154	0.0294746
ENSRNOG00000003670	AABR07030781.1	ensembl	538.501	391.779	0.739673	0.0295423
ENSRNOG00000005227	Tfap4	ensembl	60.5702	94.314	1.56913	0.0295577
ENSRNOG00000019109	Thap11	ensembl	288.12	205.355	0.723415	0.0295748
ENSRNOG00000054250	Fam186b	ensembl	0.325929	3.69392	8.17348	0.0296334
ENSRNOG00000036864	Actl10	ensembl	3.30364	9.95656	2.99898	0.0296395
ENSRNOG00000028939	Rps29	ensembl	1311.44	958.169	0.742556	0.0297204
ENSRNOG00000022502	Nsrp1	ensembl_havana	1044.74	764.003	0.742776	0.0297669
ENSRNOG00000059009	AABR07010358.1	ensembl	0	3.66504	30.4678	0.0298363
ENSRNOG00000012055	Man2a2	ensembl	876.364	1131.96	1.30921	0.0302208
ENSRNOG00000061902	LOC103692173	ensembl	170.937	242.648	1.4322	0.0304224
ENSRNOG00000051622	U6	ensembl	2.89386	9.12619	3.04162	0.0305469
ENSRNOG00000027445	AABR07060293.1	ensembl	245.148	332.51	1.3718	0.0305533
ENSRNOG00000053606	SCARNA6	ensembl	221.694	138.269	0.637193	0.0305697
ENSRNOG00000028650	Inf2	ensembl	95.3012	137.775	1.47283	0.0305739
ENSRNOG00000019921	Rhbdl1	ensembl	145.815	201.627	1.39933	0.030641
ENSRNOG00000011011	Nmb	ensembl	19.2372	34.3575	1.82055	0.0307155
ENSRNOG00000051710	RGD1559808	ensembl	9.87226	2.73057	0.291716	0.0307385
ENSRNOG00000004843	Pole3	ensembl	985.203	699.894	0.722334	0.0307771
ENSRNOG00000045655	LOC103690005	ensembl	1030.88	714.397	0.706176	0.0307952
ENSRNOG00000049105	AC095947.2	ensembl	278.991	193.843	0.704751	0.030849
ENSRNOG00000058618	Dcst2	ensembl	75.8975	118.536	1.56822	0.0308671
ENSRNOG00000022994	Nlrp5	ensembl	2.15732	8.89293	3.93255	0.0309748
ENSRNOG00000005707	Bfsp1	ensembl	34.4771	19.1791	0.570225	0.0310513
ENSRNOG00000006204	Slc30a3	ensembl	522.409	726.416	1.4062	0.0310614
ENSRNOG00000009835	Tram1l1	ensembl	346.263	468.22	1.3654	0.0311635
ENSRNOG00000028958	AABR07024795.1	ensembl	62.7559	141.833	2.25785	0.0312165
ENSRNOG00000015953	Oaz2	ensembl	818.498	1043.19	1.29119	0.0312456
ENSRNOG00000017417	Gabarap	ensembl	2107.2	3089.97	1.47915	0.0312782
ENSRNOG00000020618	Rpl13a	ensembl	1376.55	961.339	0.710791	0.0314806
ENSRNOG00000031092	Rock1	ensembl	3393.41	2568.43	0.768281	0.0315109
ENSRNOG00000017872	LOC688778	ensembl	4.14064	11.2185	2.72788	0.0315232
ENSRNOG00000059422	SNORA71	ensembl	7.14125	15.6822	2.18869	0.0316394
ENSRNOG00000009738	LOC361108	ensembl	408.795	289.172	0.720255	0.031659
ENSRNOG00000014173	Smc3	ensembl	3112.35	2343.53	0.764545	0.0316699
ENSRNOG00000000438	Rnf5	ensembl_havana	404.962	642.03	1.59832	0.0318165
ENSRNOG00000018969	Gpatch4	ensembl	777.217	570.746	0.745868	0.0318722
ENSRNOG00000023346	Rsg1	ensembl	40.6975	63.2379	1.57137	0.0319635
ENSRNOG00000056017	Bcl7a	ensembl	136.603	197.993	1.46192	0.0319703
ENSRNOG00000049983	Shd	ensembl	659.4	877.254	1.34679	0.0319992
ENSRNOG00000003136	Fcrla	ensembl	6.2204	15.7027	2.48583	0.032035
ENSRNOG00000014054	Adam7	ensembl	34.6242	55.8534	1.63394	0.0320905
ENSRNOG00000031930	Bin2	ensembl	117.465	77.8291	0.671669	0.0321524
ENSRNOG00000021270	Trmt6	ensembl	541.263	402.711	0.754469	0.0323071
ENSRNOG00000057697	U6	ensembl	7.73701	2.24469	0.293335	0.0323562
ENSRNOG00000032523	RGD1563157	ensembl	50.9014	27.9425	0.561608	0.032392
ENSRNOG00000056243	ST7	ensembl	214.897	300.57	1.41477	0.0325639
ENSRNOG00000054165	AABR07063281.1	ensembl	108.385	197.586	1.8623	0.0326172
ENSRNOG00000003217	Lgals3bp	ensembl	379.36	502.849	1.3413	0.0326558
ENSRNOG00000028436	Rprml	ensembl	21.4341	38.0985	1.79886	0.0327447
ENSRNOG00000037340	Epha10	ensembl	208.043	282.693	1.37429	0.0327898
ENSRNOG00000019447	Ecel1	ensembl	405.305	601.557	1.51299	0.0328413
ENSRNOG00000055259	Phldb3	ensembl	23.9965	10.5078	0.439616	0.0328608
ENSRNOG00000022718	AC094246.1	ensembl	3.59636	9.44037	2.5614	0.0328883
ENSRNOG00000001474	Wbscr28	ensembl	102.709	147.643	1.45082	0.0330412
ENSRNOG00000022572	LOC100911356	ensembl	298.647	196.977	0.669885	0.0330624
ENSRNOG00000059386	Nudt19	ensembl	447.044	333.053	0.756289	0.0330785
ENSRNOG00000001884	Ranbp1	ensembl	1295.36	978.111	0.766923	0.033176
ENSRNOG00000031535	Ptgdrl	ensembl	1.14632	5.44178	4.58568	0.033197
ENSRNOG00000009568	Hdac1	ensembl	380.47	276.979	0.738811	0.0332209
ENSRNOG00000031127	Snrpe	ensembl	613.946	447.108	0.74045	0.0332273
ENSRNOG00000005003	Ptprn2	ensembl	2199.09	2865.13	1.32024	0.0332476
ENSRNOG00000053058	AABR07014885.1	ensembl	0.719106	4.64521	5.61932	0.0332792
ENSRNOG00000009433	Ccdc109b	ensembl	4.34951	10.689	2.42083	0.0332965
ENSRNOG00000049468	AABR07043449.1	ensembl	16.962	7.68648	0.460169	0.0333773
ENSRNOG00000022570	Pus7l	ensembl	74.3259	46.48	0.639156	0.0334018
ENSRNOG00000016351	Frrs1	ensembl	42.7931	65.721	1.54769	0.0334078
ENSRNOG00000050051	Pin4	ensembl_havana	624.088	436.161	0.71226	0.0334575
ENSRNOG00000006766	Laptm4b	ensembl	1517.72	2119.16	1.41069	0.0335257
ENSRNOG00000020204	Srp19	ensembl	1096.3	817.857	0.757517	0.0336281
ENSRNOG00000031653	Ccdc58	ensembl	100.344	145.058	1.47055	0.0336331
ENSRNOG00000052455	LOC100910245	ensembl	25.1151	13.11	0.539003	0.033676
ENSRNOG00000050552	Snap23	ensembl	216.403	149.759	0.699248	0.0336838
ENSRNOG00000061005	AABR07016572.1	ensembl	32.6117	50.4894	1.57426	0.0337165
ENSRNOG00000031233	Mapk12	ensembl	252.455	349.457	1.39937	0.0337403
ENSRNOG00000015430	Nlgn2	ensembl_havana	699.441	978.433	1.41464	0.0337966
ENSRNOG00000050044	Ptp4a2	ensembl	3542.38	2724.73	0.780742	0.0338487
ENSRNOG00000000543	Frk	ensembl	60.4065	29.853	0.49694	0.0338547
ENSRNOG00000014661	Zfp385d	ensembl	515.581	676.229	1.33292	0.0340044
ENSRNOG00000058380	U6	ensembl	4.24822	0.657572	0.166857	0.0340609
ENSRNOG00000013874	LOC100360522	ensembl	2687.96	1933.97	0.730929	0.0340714
ENSRNOG00000018788	Btbd2	ensembl	682.112	919.065	1.36135	0.0341442
ENSRNOG00000027916	Txndc2	ensembl	1.07908	5.28104	4.54849	0.0341456
ENSRNOG00000031965	Impdh2	ensembl	557.309	719.381	1.30701	0.034181
ENSRNOG00000012141	Xrcc3	ensembl	9.36665	19.1938	2.02836	0.0342007
ENSRNOG00000009398	Tceanc2	ensembl	101.115	144.424	1.44947	0.0342177
ENSRNOG00000015835	Cacna2d2	ensembl	1020.32	1332.67	1.32316	0.034225
ENSRNOG00000042458	Stau2	ensembl	3190.02	4133.41	1.31045	0.0342793
ENSRNOG00000057398	SNORD19B	ensembl	1.81479	7.22837	3.77215	0.0342992
ENSRNOG00000009735	Fibcd1	ensembl	11.9678	22.786	1.91565	0.0343108
ENSRNOG00000017421	Alpk2	ensembl	60.9875	30.1039	0.502766	0.0343165
ENSRNOG00000050049	AABR07009787.1	ensembl	8.83352	19.7076	2.25245	0.0343345
ENSRNOG00000009253	Igsf9b	ensembl	119.775	174.77	1.47234	0.0344241
ENSRNOG00000054322	AABR07025051.3	ensembl	17.6899	37.3046	2.10378	0.0344827
ENSRNOG00000058909	Rps9	ensembl	3071.82	2093.17	0.693186	0.0345649
ENSRNOG00000055078	Cyp4b1	ensembl	15.9012	27.887	1.7948	0.0346146
ENSRNOG00000015657	Olr69	ensembl	0	3.37974	28.621	0.0348439
ENSRNOG00000019920	Doc2a	ensembl	252.425	340.908	1.37259	0.0349041
ENSRNOG00000004650	Begain	ensembl	285.497	405.286	1.43939	0.034917
ENSRNOG00000046207	Cbx4	ensembl	173.44	240.189	1.39835	0.0349671
ENSRNOG00000017397	Upf3a	ensembl_havana	666.15	490.888	0.749345	0.0351058
ENSRNOG00000020657	Shc1	ensembl	152	211.395	1.40973	0.0351161
ENSRNOG00000033207	RGD1565048	ensembl	37.6598	17.1181	0.473614	0.0351659
ENSRNOG00000027156	Morn4	ensembl	237.572	350.966	1.49209	0.0352676
ENSRNOG00000043197	LOC688613	ensembl	307.114	453.83	1.48861	0.0354076
ENSRNOG00000050854	LOC100912455	ensembl	94.6438	140.076	1.49489	0.0354399
ENSRNOG00000056954	Inpp5k	ensembl	377.637	532.18	1.42092	0.0355348
ENSRNOG00000051307	Aoc3	havana	66.9196	41.6291	0.629885	0.0355549
ENSRNOG00000009824	Irf2	ensembl	330.126	241.319	0.742525	0.0356225
ENSRNOG00000057275	AABR07059024.1	ensembl	1.405	5.42242	3.56481	0.0356417
ENSRNOG00000055611	SNORA5	ensembl	0	2.69185	22.9796	0.0356428
ENSRNOG00000051836	Zfp92	ensembl	67.0459	99.6217	1.49497	0.0357419
ENSRNOG00000054917	Mrgpre	ensembl	72.0339	104.859	1.47575	0.035807
ENSRNOG00000002187	Ropn1	ensembl	0.719106	4.18472	5.15044	0.0358188
ENSRNOG00000000012	Tcf15	ensembl	9.00668	3.01096	0.344777	0.0358682
ENSRNOG00000000523	Ppil1	ensembl	101.654	147.158	1.46433	0.0359094
ENSRNOG00000014786	Ccne1	ensembl	279.562	197.168	0.713129	0.0360622
ENSRNOG00000012808	Tmem259	ensembl	458.26	752.832	1.65264	0.0360749
ENSRNOG00000006226	Cacng2	ensembl	398.63	547.729	1.3935	0.036109
ENSRNOG00000058476	Mast2	ensembl	1446.94	1931.37	1.35091	0.0361375
ENSRNOG00000011305	Sox10	ensembl	1146.32	1507.4	1.33136	0.0362072
ENSRNOG00000035580	Mir3597-3	ensembl	3.36057	11.9981	3.34188	0.036208
ENSRNOG00000054722	U1	ensembl	31.5642	16.5612	0.535679	0.0363331
ENSRNOG00000000889	LOC304239	ensembl_havana	46.7774	26.1162	0.57238	0.0363488
ENSRNOG00000008765	Zfhx4	ensembl	951.53	1243.8	1.33016	0.0363631
ENSRNOG00000060858	AABR07043711.1	ensembl	10.6134	20.2019	1.92399	0.0364604
ENSRNOG00000012620	Syngr3	ensembl	647.735	935.943	1.45819	0.0364997
ENSRNOG00000051548	Lmod1	ensembl	439.125	321.865	0.744475	0.0365226
ENSRNOG00000059356	AABR07042731.1	ensembl	4.25771	0	0.0289971	0.0365767
ENSRNOG00000042961	Ormdl1	ensembl	9.48537	19.1721	2.02606	0.0366714
ENSRNOG00000046734	Evx1	ensembl	9.26536	18.5662	2.01501	0.0367139
ENSRNOG00000058444	LOC102548682	ensembl	887.92	1510.34	1.7123	0.0367586
ENSRNOG00000014647	Cbfb	ensembl	897.871	1200.92	1.35388	0.0367939
ENSRNOG00000025321	Ankrd31	ensembl	0.325929	6.41149	13.8515	0.0368003
ENSRNOG00000012703	Crh	ensembl	500.034	308.962	0.626284	0.036845
ENSRNOG00000030807	LOC100912427	ensembl	465.813	344.856	0.750663	0.0368834
ENSRNOG00000056279	AC115369.1	ensembl	1.91608	8.32961	4.27179	0.0369691
ENSRNOG00000008309	Rpa3	ensembl	120.109	73.016	0.620935	0.0370939
ENSRNOG00000056670	AABR07000902.1	ensembl	0.393178	3.44971	7.47483	0.0371085
ENSRNOG00000046961	AABR07041057.1	ensembl	7.24254	2.37275	0.344374	0.0371313
ENSRNOG00000024349	Cbarp	ensembl	521.408	788.529	1.52692	0.0371368
ENSRNOG00000000841	Ddx39b	ensembl_havana	1267.94	1632.8	1.30204	0.037218
ENSRNOG00000033177	AC118841.1	ensembl	797.747	590.345	0.751698	0.0373575
ENSRNOG00000056458	Cep290	ensembl	1645.95	1197.1	0.739505	0.0374442
ENSRNOG00000032708	RT1-Bb	ensembl_havana	5.49583	14.4761	2.60592	0.0375247
ENSRNOG00000001057	Ctxn1	ensembl	163.681	251.99	1.55692	0.0375353
ENSRNOG00000017310	Rnpc3	ensembl	426.346	298.249	0.708162	0.037594
ENSRNOG00000008951	Rasl10a	ensembl	379.126	529.352	1.41019	0.0376593
ENSRNOG00000013503	Cdh24	ensembl	95.3372	141.362	1.50256	0.0377491
ENSRNOG00000030069	Faim	ensembl	386.772	278.344	0.728565	0.0379457
ENSRNOG00000018488	Cd40	ensembl	5.54481	14.2101	2.57373	0.0379684
ENSRNOG00000048650	LOC103690175	ensembl	353.041	245.069	0.70545	0.0380383
ENSRNOG00000021420	Tirap	ensembl	17.1892	30.6393	1.80124	0.0380549
ENSRNOG00000033378	Rnf123	ensembl	644.645	849.833	1.33361	0.0382696
ENSRNOG00000042286	Nsl1	ensembl	20.4966	35.5396	1.74216	0.0382783
ENSRNOG00000030483	Rabggta	ensembl	182.207	264.881	1.47081	0.0384114
ENSRNOG00000048073	LOC103694169	ensembl	125.158	81.1877	0.660265	0.0384366
ENSRNOG00000017820	Nqo2	ensembl	87.4048	132.486	1.52303	0.0384597
ENSRNOG00000028097	Slc7a14	ensembl	1417.21	1817.4	1.29852	0.0384679
ENSRNOG00000007849	Zmat5	ensembl	33.5294	18.4782	0.551356	0.0384734
ENSRNOG00000060878	AABR07066020.1	ensembl	168.954	254.157	1.52572	0.0384794
ENSRNOG00000047664	AABR07025299.1	ensembl	2.65179	0	0.0455682	0.0386218
ENSRNOG00000022312	Lrsam1	ensembl	231.954	312.561	1.36435	0.0386439
ENSRNOG00000035632	Mirlet7a1	ensembl	75.0596	40.9248	0.550585	0.0387325
ENSRNOG00000022737	LOC691970	ensembl	0.786355	7.35548	8.72257	0.0387445
ENSRNOG00000015205	Cyb5a	ensembl	1338.66	1019.68	0.772848	0.0388279
ENSRNOG00000007926	Map2k5	ensembl	234.737	339.228	1.46776	0.0389161
ENSRNOG00000050877	LOC100912538	ensembl	436.713	314.987	0.733292	0.0389866
ENSRNOG00000033912	Fcho1	ensembl	248.943	335.134	1.3621	0.0391971
ENSRNOG00000011606	LOC680385	ensembl	3189.41	2362.39	0.752606	0.0392979
ENSRNOG00000050453	Fbxo27	ensembl	25.3311	44.5513	1.75992	0.0393448
ENSRNOG00000011501	Atp1b3	ensembl	2545.74	1913.38	0.762377	0.0393658
ENSRNOG00000011830	Plekha3	ensembl	653.029	875.073	1.353	0.0394436
ENSRNOG00000000589	RGD1310495	ensembl	13.9852	6.43782	0.467239	0.0395647
ENSRNOG00000016272	Edf1	ensembl	1292.08	986.374	0.775497	0.0396018
ENSRNOG00000033863	RGD1560470	ensembl	142.513	221.435	1.56965	0.0396181
ENSRNOG00000048644	AC115371.1	ensembl	14.8284	26.5117	1.79044	0.0396371
ENSRNOG00000013300	Atpif1	ensembl_havana	2930.19	2124.19	0.736791	0.0396805
ENSRNOG00000012368	Dnajc17	ensembl_havana	49.1143	81.1864	1.6677	0.0397195
ENSRNOG00000011831	Nudt18	ensembl	345.764	448.754	1.31568	0.0398143
ENSRNOG00000054508	Foxp2	ensembl	361.863	238.137	0.666185	0.0400449
ENSRNOG00000001071	Higd2al1	ensembl	35.7466	61.1518	1.71956	0.0401285
ENSRNOG00000018916	Bcl7c	ensembl	80.0393	116.381	1.48297	0.0402349
ENSRNOG00000001198	Fam222a	ensembl	42.9861	65.7316	1.54318	0.0404104
ENSRNOG00000018935	AABR07001497.1	ensembl	2392.01	3587.84	1.51246	0.0404107
ENSRNOG00000061106	U2	ensembl	41.3028	20.6953	0.51088	0.0404828
ENSRNOG00000000840	Atp6v1g2	ensembl_havana	6081.41	8486.71	1.40865	0.0405253
ENSRNOG00000040595	SNORD79	ensembl	27.2567	15.5348	0.579861	0.0405809
ENSRNOG00000020947	Egln2	ensembl	402.849	542.846	1.36551	0.0407229
ENSRNOG00000004820	Sar1b	ensembl	706.756	930.72	1.3309	0.0407243
ENSRNOG00000052909	AABR07036746.1	ensembl	37.0632	18.6981	0.517503	0.0407366
ENSRNOG00000008849	Guca2a	ensembl	0	2.54444	21.3754	0.0407526
ENSRNOG00000008001	Rab3b	ensembl	318.503	422.09	1.34182	0.0407656
ENSRNOG00000014125	Evi2b	ensembl	145.537	103.099	0.717783	0.0407911
ENSRNOG00000037712	Mfsd6l	ensembl	0.325929	3.38814	7.27106	0.0407958
ENSRNOG00000016143	Gpr162	ensembl	874.578	1109.06	1.28342	0.0408628
ENSRNOG00000057811	AABR07015055.2	ensembl	23.2574	50.5111	2.15258	0.0408884
ENSRNOG00000019626	Slc27a5	ensembl	11.0644	20.8546	1.88056	0.0409484
ENSRNOG00000005008	Angpt4	ensembl	12.1767	5.30881	0.447281	0.0409628
ENSRNOG00000059673	AABR07072283.2	ensembl	64.9934	38.2072	0.595819	0.0411102
ENSRNOG00000052968	Hnrnpa3	ensembl	215.115	142.58	0.673015	0.0411683
ENSRNOG00000016910	Ralgps1	ensembl	811.104	1027.63	1.28329	0.0411826
ENSRNOG00000013847	Nova2	ensembl	55.4223	85.0054	1.54463	0.0412804
ENSRNOG00000052136	U4	ensembl	0.719106	3.80753	4.73661	0.0412818
ENSRNOG00000021056	Kcnj14	ensembl	1031.72	1357.49	1.33423	0.0413014
ENSRNOG00000002074	Rest	ensembl	479.039	356.729	0.755298	0.0413479
ENSRNOG00000030788	Olr36	ensembl	1.09568	4.61744	3.8983	0.0414889
ENSRNOG00000006929	Hnrnpll	ensembl	650.888	491.096	0.764926	0.0414967
ENSRNOG00000037165	Nipal3	ensembl	324.362	441.818	1.38055	0.0417544
ENSRNOG00000021442	Hddc2	ensembl	257.301	177.121	0.698833	0.0418704
ENSRNOG00000021046	Sult2b1	ensembl	52.8582	82.2915	1.56211	0.0419028
ENSRNOG00000016961	Rps27	ensembl	440.643	315.624	0.726025	0.0420297
ENSRNOG00000005271	Rapgef5	ensembl	2886.27	2258.28	0.792872	0.0420465
ENSRNOG00000021285	Celsr1	ensembl	64.4417	37.9429	0.599473	0.042061
ENSRNOG00000024082	Gldn	ensembl	40.9129	23.1753	0.581234	0.0420735
ENSRNOG00000010673	Eral1	ensembl	414.624	552.471	1.3464	0.0421127
ENSRNOG00000055021	U6atac	ensembl	0.393178	3.61299	7.71154	0.0421922
ENSRNOG00000011929	Abcd3	ensembl	4048.9	3079.68	0.773044	0.0421978
ENSRNOG00000007528	Kcnh7	ensembl	675.782	453.57	0.679677	0.0422893
ENSRNOG00000039279	Nhlrc4	ensembl	3.98954	0.571725	0.175982	0.0423207
ENSRNOG00000025278	Scai	ensembl	286.98	395.861	1.39707	0.0423234
ENSRNOG00000001443	Rhbdd2	ensembl	180.073	267.3	1.4991	0.0423459
ENSRNOG00000049814	Rbm39	ensembl	1412.55	1043.18	0.748852	0.0424773
ENSRNOG00000047854	RT1-DMa	ensembl_havana	24.3596	42.9709	1.75456	0.0424837
ENSRNOG00000013743	Sec61a1	ensembl	732.84	932.57	1.28797	0.0425047
ENSRNOG00000037871	Sfxn5	ensembl	2548.94	3253.39	1.29239	0.0425169
ENSRNOG00000062052	Rn60_19_0563.3	havana	1.73093	6.00018	3.28605	0.0425758
ENSRNOG00000003789	AABR07037054.1	ensembl	398.272	252.558	0.645653	0.0425888
ENSRNOG00000035497	Mir3578	ensembl	1.09568	4.50383	3.85367	0.0425889
ENSRNOG00000027869	Sox5	ensembl_havana	434.935	328.06	0.764483	0.0426247
ENSRNOG00000034182	LOC100361934	ensembl	988.851	706.352	0.722826	0.0426316
ENSRNOG00000021137	Kctd15	ensembl	202.271	279.139	1.39569	0.042902
ENSRNOG00000025725	LOC100910068	ensembl	3.79811	0.338466	0.113011	0.0429498
ENSRNOG00000008873	Ino80b	ensembl	231.029	161.631	0.711728	0.0430737
ENSRNOG00000048270	Knop1	ensembl	216.694	150.374	0.707542	0.0431092
ENSRNOG00000011317	Pkn2	ensembl	1430.14	1103.88	0.783399	0.0431194
ENSRNOG00000017213	Cdk11b	ensembl	1212.39	926.175	0.775871	0.0433273
ENSRNOG00000046949	Kcnb1	ensembl	418.921	541.765	1.3138	0.0433343
ENSRNOG00000057081	AABR07068593.1	ensembl	3.9389	0.657572	0.18055	0.0433439
ENSRNOG00000014654	LOC691807	ensembl	694.015	893.902	1.30338	0.0433768
ENSRNOG00000025327	Tert	ensembl	8.58112	19.0501	2.2069	0.0434294
ENSRNOG00000005951	AABR07052085.1	ensembl	996.821	745.439	0.75812	0.0435188
ENSRNOG00000061139	Taf1a	ensembl	145.395	97.0014	0.677627	0.0435356
ENSRNOG00000007387	Per1	ensembl	164.362	246.109	1.50752	0.0435669
ENSRNOG00000028557	Hibch	ensembl	1089.15	1406.42	1.31015	0.0435896
ENSRNOG00000003837	Mif4gd	ensembl	59.1967	85.5203	1.45669	0.0436273
ENSRNOG00000029141	Trabd2b	ensembl	2.85982	8.81549	2.95375	0.0436732
ENSRNOG00000000109	Fgf20	ensembl	6.16429	1.35386	0.220299	0.0436958
ENSRNOG00000004061	Pnn	ensembl	3381.98	2571.74	0.772054	0.0437221
ENSRNOG00000060657	AABR07000404.1	ensembl	23.7851	50.599	2.11547	0.0437289
ENSRNOG00000054724	Pycrl	ensembl	204.43	278.863	1.38073	0.0437585
ENSRNOG00000003003	Tbc1d19	ensembl	616.908	802.633	1.31949	0.0437653
ENSRNOG00000020689	Cpeb3	ensembl	346.059	473.909	1.38721	0.0438087
ENSRNOG00000005718	AABR07065406.1	ensembl	353.778	243.47	0.699635	0.0438165
ENSRNOG00000004402	Lpgat1	ensembl	2954.82	2246.06	0.769845	0.043922
ENSRNOG00000028523	Tctn1	ensembl	151.748	208.224	1.38843	0.0439788
ENSRNOG00000004022	Klhdc9	ensembl	23.0583	37.9124	1.66805	0.0439935
ENSRNOG00000003054	Cask	ensembl	310.001	201.381	0.662685	0.0440274
ENSRNOG00000010834	Mpped1	ensembl	340.635	456.295	1.3604	0.0441612
ENSRNOG00000050978	LOC100911295	ensembl	179.601	114.006	0.644982	0.0442286
ENSRNOG00000014896	Adgrg3	ensembl	2.07347	6.45718	2.88949	0.0443243
ENSRNOG00000027894	Iqgap3	ensembl	103.426	62.0737	0.608202	0.0443973
ENSRNOG00000020438	Prpf38b	ensembl	1886.22	1446.17	0.778195	0.0444249
ENSRNOG00000013017	Arnt2	ensembl	1963.62	2520.88	1.29956	0.044474
ENSRNOG00000033583	LOC100910577	ensembl	227.159	150.786	0.672341	0.0445298
ENSRNOG00000006090	Ucn	ensembl	8.81442	2.39211	0.287361	0.0446849
ENSRNOG00000008218	Atp6v0e2	ensembl	1689.51	2425.87	1.44791	0.0448293
ENSRNOG00000031706	RGD1563601	ensembl	8483.72	6517.45	0.779873	0.0448914
ENSRNOG00000049052	Sgk3	ensembl	310.168	224.149	0.73425	0.045049
ENSRNOG00000014850	Amhr2	ensembl	25.3534	12.8588	0.513817	0.0450567
ENSRNOG00000046863	C1ql2	ensembl	183.874	281.009	1.54366	0.0451258
ENSRNOG00000053968	AABR07019086.1	ensembl	2769.39	2091.83	0.76771	0.0451469
ENSRNOG00000001469	Eln	ensembl	123.943	75.0817	0.607972	0.0451813
ENSRNOG00000000728	Clic2	ensembl	42.1927	25.5117	0.613243	0.0451836
ENSRNOG00000022248	Fbxl16	ensembl	149.736	227.388	1.53466	0.0454151
ENSRNOG00000043311	Birc7	ensembl	16.1172	31.8786	1.97655	0.0454954
ENSRNOG00000059110	AABR07068341.1	ensembl	526.048	391.886	0.757756	0.0455723
ENSRNOG00000003755	Clgn	ensembl	409.234	307.012	0.762218	0.045595
ENSRNOG00000051160	Fendrr	havana	6.62389	1.61489	0.250843	0.0456009
ENSRNOG00000014050	Ptges2	ensembl	298.318	399.491	1.3531	0.0456394
ENSRNOG00000000604	Hdac2	ensembl	1311.93	913.462	0.707022	0.0456443
ENSRNOG00000045955	LOC103691995	ensembl	52.5539	33.0255	0.639565	0.0457148
ENSRNOG00000046799	Phb	ensembl	625.66	803.154	1.2998	0.0457163
ENSRNOG00000050982	Rn60_14_0082.1	havana	2.58454	7.83881	2.9593	0.0457617
ENSRNOG00000051915	Spred3	ensembl_havana	61.6007	91.0671	1.49262	0.0457996
ENSRNOG00000017656	Ccdc172	ensembl	2.97771	8.10095	2.77506	0.0458175
ENSRNOG00000048758	Snrpd2l	ensembl	214.489	426.26	1.99842	0.0459581
ENSRNOG00000059640	Ccl28	ensembl	1.11228	5.40798	4.51945	0.0459795
ENSRNOG00000007422	Vav2	ensembl	347.873	447.875	1.30754	0.0459953
ENSRNOG00000058283	SNORA62	ensembl	53.7514	102.307	1.90006	0.0460346
ENSRNOG00000012613	F13b	ensembl	0.393178	4.209	8.81039	0.0460549
ENSRNOG00000056907	Nipbl	ensembl	2540.46	1955.6	0.781931	0.0460917
ENSRNOG00000001874	Slc7a4	ensembl	101.202	150.968	1.50649	0.0461259
ENSRNOG00000016422	Klhl36	ensembl	121.448	175.718	1.45783	0.0461343
ENSRNOG00000054058	Osbpl1a	ensembl	8365.58	6616.41	0.802054	0.0462329
ENSRNOG00000020392	Stxbp3	ensembl	2273.02	1720.71	0.767738	0.0462723
ENSRNOG00000028747	AABR07073039.1	ensembl	650.164	457.19	0.715989	0.0462736
ENSRNOG00000001712	Alg3	ensembl	334.857	504.558	1.52045	0.0463088
ENSRNOG00000024623	RGD1309170	ensembl	10.3556	4.48447	0.449823	0.0463908
ENSRNOG00000016643	Lpcat2	ensembl	138.792	186.676	1.3622	0.0463952
ENSRNOG00000021681	Eea1	ensembl	4974.4	3887.87	0.79312	0.0466033
ENSRNOG00000010029	Ubald2	ensembl	63.2419	112.689	1.78803	0.0466285
ENSRNOG00000018239	Dhrs4	ensembl	496.05	355.104	0.727156	0.0469364
ENSRNOG00000019163	Syt6	ensembl	248.638	338.941	1.38156	0.0469602
ENSRNOG00000019890	Folr2	ensembl	5.70304	12.7476	2.18194	0.0469706
ENSRNOG00000031588	AC112531.1	ensembl	2.30925	7.71424	3.3568	0.0470985
ENSRNOG00000055426	Rab42	ensembl	30.6172	18.2038	0.597661	0.0471041
ENSRNOG00000001645	Filip1l	ensembl	301.915	214.266	0.716957	0.0471501
ENSRNOG00000043511	Etv3l	ensembl	1.11228	4.75152	4.16273	0.0472168
ENSRNOG00000012972	Alox5	ensembl	36.4905	21.5194	0.59054	0.0472663
ENSRNOG00000009723	Ptpmt1	ensembl	410.113	296.392	0.731948	0.0473184
ENSRNOG00000045535	Rn50_X_0745.1	havana	772.365	1087.55	1.42044	0.0473681
ENSRNOG00000005775	Phf14	ensembl	3494.57	2689.14	0.78145	0.0475397
ENSRNOG00000026928	AABR07008097.1	ensembl	727.226	562.267	0.783737	0.0475429
ENSRNOG00000050800	LOC100911576	ensembl	3912.61	2976.33	0.772837	0.0475693
ENSRNOG00000007728	Gsdmd	ensembl_havana	66.437	96.8945	1.47912	0.047582
ENSRNOG00000018845	Snapc4	ensembl	131.654	184.796	1.41718	0.0475996
ENSRNOG00000014398	Scara5	ensembl	36.4589	17.4836	0.478742	0.0476438
ENSRNOG00000023917	AABR07034362.1	ensembl	372.385	538.855	1.45797	0.047661
ENSRNOG00000023182	RGD1565317	ensembl	35.7383	16.2262	0.469744	0.0476667
ENSRNOG00000052564	Gpx3	ensembl	287.485	405.959	1.42819	0.0477052
ENSRNOG00000015670	Stx7	ensembl	932.194	1243.73	1.34867	0.0478415
ENSRNOG00000016041	Zc3h12d	ensembl	19.0695	9.8742	0.538994	0.0478489
ENSRNOG00000010947	Mmp14	ensembl	425.168	312.198	0.744488	0.0478723
ENSRNOG00000008950	Adi1	ensembl	213.458	290.854	1.38109	0.048
ENSRNOG00000046211	Fbxw4	ensembl	218.815	292.015	1.35269	0.0481154
ENSRNOG00000054446	Sltm	ensembl	2065.22	1589.08	0.780699	0.0481518
ENSRNOG00000056246	Gls	ensembl	9806.67	7142.48	0.734966	0.0482134
ENSRNOG00000004819	Porcn	ensembl	239.447	335.6	1.4148	0.0482445
ENSRNOG00000054840	AABR07053837.1	ensembl	83.7455	55.2679	0.664366	0.0482938
ENSRNOG00000031397	Stk32b	ensembl	10.6704	21.0228	1.95561	0.0483012
ENSRNOG00000055430	AC111428.1	ensembl	0	2.45859	20.8766	0.048371
ENSRNOG00000055286	LOC103689986	ensembl	22.3202	38.1095	1.70233	0.0484419
ENSRNOG00000025388	Mrpl33	ensembl	1331.51	961.94	0.732891	0.0484686
ENSRNOG00000061268	AABR07072876.2	ensembl	3.03465	0	0.0381033	0.0485014
ENSRNOG00000022483	Trim50	ensembl	7.82715	16.6337	2.1171	0.048523
ENSRNOG00000013042	Htr1b	ensembl	348.917	453.642	1.32041	0.0486553
ENSRNOG00000057880	Myh11	ensembl	2164.26	1708.39	0.799583	0.0486949
ENSRNOG00000048878	Smim24	ensembl	5.41115	1.3345	0.246392	0.0487963
ENSRNOG00000003139	Smc1a	ensembl	7468.75	5762.21	0.783674	0.0488592
ENSRNOG00000007486	Atg7	ensembl	205.022	283.346	1.39595	0.048973
ENSRNOG00000008834	Dach1	ensembl	90.7631	128.311	1.42453	0.0489956
ENSRNOG00000019980	Tomm20	ensembl	3993.01	2967.83	0.755187	0.0490501
ENSRNOG00000009917	LOC500227	ensembl	18.5759	30.1643	1.63842	0.0490909
ENSRNOG00000000499	Tcp11	ensembl	0	2.30626	20.1392	0.0491099
ENSRNOG00000059714	Hsp90aa1	ensembl	27696.8	21215.2	0.776559	0.0492125
ENSRNOG00000051929	Phox2b	ensembl	33.1219	50.4795	1.55798	0.0492529
ENSRNOG00000007673	Ppig	ensembl	3366.12	2608.54	0.786953	0.0493347
ENSRNOG00000015440	Wrn	ensembl	875.738	674.553	0.781627	0.0493795
ENSRNOG00000048091	AC121443.1	ensembl	65.1999	36.4244	0.569556	0.0493991
ENSRNOG00000011955	AABR07026997.1	ensembl	3254.7	2426.35	0.757127	0.0494396
ENSRNOG00000011416	Vegfc	ensembl	17.7492	29.5828	1.7075	0.0495084
ENSRNOG00000000184	Tmprss6	ensembl	11.1142	20.2828	1.82715	0.0495882
ENSRNOG00000003845	Wnt3	ensembl	165.11	99.6828	0.608514	0.0496143
ENSRNOG00000043382	Olfr798	ensembl	0	2.15885	18.444	0.0496887
ENSRNOG00000029377	Rpl38	ensembl	132.33	89.5549	0.690898	0.0497375
ENSRNOG00000018864	Klk4	ensembl	4.98393	1.0154	0.206865	0.0497586
ENSRNOG00000052789	AABR07044562.1	ensembl	7.37704	1.94495	0.269186	0.0497685
ENSRNOG00000033389	Susd2	ensembl	1389.5	1803.04	1.31605	0.0498948
ENSRNOG00000007605	RGD1560831	ensembl	170.242	119.042	0.705772	0.0499221
ENSRNOG00000005619	RGD1310262	ensembl	27.6166	46.0952	1.69019	0.0499619
ENSRNOG00000020416	Zfr2	ensembl	201.729	273.416	1.36832	0.0499696
ENSRNOG00000036487	Mir544	ensembl	8.71479	3.04127	0.359419	0.0500503
ENSRNOG00000030199	Tmem192	ensembl	388.449	532.753	1.38289	0.0500675
ENSRNOG00000022623	Ttll12	ensembl	200.611	298.268	1.50356	0.0500679
ENSRNOG00000056826	Arap2	ensembl_havana	5669.96	4507.86	0.805898	0.0501331
ENSRNOG00000019758	Ipo13	ensembl	1454.43	1879.71	1.3069	0.0502059
ENSRNOG00000051102	Rn50_1_1361.1	havana	1608.71	1213.7	0.765869	0.050209
ENSRNOG00000025285	Gfm2	ensembl	617.036	475.622	0.782101	0.0502971
ENSRNOG00000018812	Rpp25	ensembl	105.353	143.433	1.38431	0.0503646
ENSRNOG00000051232	Gbe1	ensembl_havana	1363.32	1070.36	0.795624	0.0503754
ENSRNOG00000037951	Nhsl2	ensembl_havana	241.678	338.513	1.41375	0.050376
ENSRNOG00000039339	Mslnl	ensembl	9.84451	19.044	1.93589	0.0504022
ENSRNOG00000019306	Syt12	ensembl	883.751	1099.79	1.26022	0.0504051
ENSRNOG00000041492	Mir1249	ensembl	5.78772	12.6678	2.17874	0.0504216
ENSRNOG00000004578	Cthrc1	ensembl	34.3653	17.5002	0.516574	0.0504321
ENSRNOG00000050864	LOC100910990	ensembl	204.46	288.29	1.42767	0.0504834
ENSRNOG00000007206	LOC361016	ensembl	2710.09	3481.96	1.29962	0.0505332
ENSRNOG00000043400	LOC100910678	ensembl	1227.7	814.649	0.676951	0.0506533
ENSRNOG00000000858	Sapcd1	ensembl_havana	44.5666	76.6999	1.71903	0.0506831
ENSRNOG00000007874	Tamm41	ensembl	446.698	327.013	0.74408	0.0507426
ENSRNOG00000060407	Cacna1i	ensembl_havana	132.044	198.011	1.51619	0.0507509
ENSRNOG00000002682	Zfp692	ensembl	248.828	335.778	1.36189	0.0507837
ENSRNOG00000047374	Gnas	ensembl	6583.22	8368.77	1.28593	0.0508259
ENSRNOG00000020955	Myl3	ensembl	7.59219	2.09236	0.284549	0.0508491
ENSRNOG00000016705	Prpf4b	ensembl	3426.46	2584.8	0.76641	0.0509058
ENSRNOG00000016530	Nsa2	ensembl	846.594	648.267	0.775756	0.0509216
ENSRNOG00000046144	Hist1h2ail1	ensembl	0.325929	3.9659	8.77026	0.0510599
ENSRNOG00000037148	Adap2	ensembl	47.6402	29.5093	0.630378	0.0511085
ENSRNOG00000021031	Grn	ensembl	658.527	880.541	1.34918	0.0511727
ENSRNOG00000008683	Alk	ensembl	101.779	144.862	1.43816	0.0511734
ENSRNOG00000046279	AABR07063703.1	ensembl	34.0643	16.5646	0.502782	0.0511822
ENSRNOG00000025715	Dynlrb1	ensembl	3549.82	4903.99	1.39532	0.0512569
ENSRNOG00000016589	Mlf2	ensembl	2496.92	3420.36	1.38382	0.0512681
ENSRNOG00000047933	Phykpl	ensembl	99.6857	147.564	1.49239	0.0512892
ENSRNOG00000007456	Calb1	ensembl	1125.27	737.207	0.665837	0.051469
ENSRNOG00000053643	AABR07063152.1	ensembl	263.534	174.606	0.676241	0.051602
ENSRNOG00000024957	Dnali1	ensembl	14.6267	6.42687	0.440639	0.0516314
ENSRNOG00000004245	Mgst3	ensembl	775.727	1104.08	1.43691	0.0516779
ENSRNOG00000005191	Trim44	ensembl	1568.02	1145.22	0.743446	0.0517208
ENSRNOG00000049560	Glul	ensembl	36760	46183.3	1.2703	0.0518428
ENSRNOG00000016016	Zmat2	ensembl	2759.72	2079.82	0.765895	0.0518775
ENSRNOG00000020130	Arhgef1	ensembl	230.129	305.305	1.34345	0.0519023
ENSRNOG00000014182	Tns1	ensembl	1090.76	1373.9	1.27782	0.0519536
ENSRNOG00000019208	P2rx5	ensembl	322.783	423.353	1.32898	0.0521328
ENSRNOG00000032204	Uqcrb	ensembl	2092.56	1601.61	0.776295	0.0521666
ENSRNOG00000019425	Gabarapl2	ensembl	1457.85	1836.43	1.27474	0.0523038
ENSRNOG00000000047	Cd82	ensembl	402.372	526.476	1.32518	0.0524074
ENSRNOG00000061999	Rn60_12_0121.3	havana	8.16422	16.0921	1.99737	0.0525709
ENSRNOG00000008785	Klf5	ensembl	69.2297	39.9932	0.580856	0.0526895
ENSRNOG00000011092	Iqca1l	ensembl_havana	1.02843	4.65616	3.96651	0.0527075
ENSRNOG00000019848	LOC100910882	ensembl	3121.45	2358.69	0.767051	0.052719
ENSRNOG00000010274	Smc4	ensembl	982.159	757.008	0.782511	0.0527359
ENSRNOG00000014097	Psmd7	ensembl	2359.79	1831.43	0.788048	0.0527366
ENSRNOG00000032224	LOC102551184	ensembl	108.043	179.196	1.66825	0.0530357
ENSRNOG00000001607	Adamts1	ensembl	559.857	419.809	0.760683	0.0530543
ENSRNOG00000007508	Lrtm2	ensembl	338.121	438.25	1.31323	0.0530745
ENSRNOG00000013768	Defb1	ensembl	36.469	19.1516	0.522185	0.0531431
ENSRNOG00000020778	Chrnb2	ensembl	474.732	623.176	1.3288	0.053161
ENSRNOG00000052003	Mkrn2os	ensembl	32.5262	51.5567	1.61832	0.0531914
ENSRNOG00000018653	Pfdn1	ensembl	3665.89	2729.21	0.756859	0.0532248
ENSRNOG00000060263	SNORA71	ensembl	0.376573	3.42686	7.25155	0.0532519
ENSRNOG00000000219	Ano10	ensembl	982.067	1225.74	1.26497	0.0532552
ENSRNOG00000003887	Lgi2	ensembl	6720.49	5110.08	0.769849	0.0532943
ENSRNOG00000022753	Mast3	ensembl	297.313	432.344	1.47348	0.0534443
ENSRNOG00000056550	Epb41l4b	ensembl	555.459	708.263	1.29277	0.0534706
ENSRNOG00000005109	Rprm	ensembl	30.1617	46.3593	1.5631	0.0535116
ENSRNOG00000019780	Sypl2	ensembl	6.70774	14.8361	2.27637	0.0535881
ENSRNOG00000004229	Tac3	ensembl	9.76528	20.869	2.12024	0.0536297
ENSRNOG00000058393	Taf15	ensembl_havana	301.944	213.14	0.718691	0.0536353
ENSRNOG00000049622	LOC103690013	ensembl	83.7068	118.828	1.43478	0.0536499
ENSRNOG00000008469	Mettl5	ensembl	749.406	572.463	0.775034	0.0536929
ENSRNOG00000048778	RGD1559999	ensembl	0	2.43083	20.8072	0.0538739
ENSRNOG00000003189	Cited1	ensembl_havana	61.6888	92.3609	1.52657	0.0539198
ENSRNOG00000012215	Baiap2l2	ensembl	4.21418	10.7665	2.47096	0.053944
ENSRNOG00000004283	Camta2	ensembl	1198.39	1660.88	1.40108	0.0539863
ENSRNOG00000031726	Oas1e	ensembl	0	2.25913	19.9151	0.0541171
ENSRNOG00000000639	AABR07044825.1	ensembl	68.5188	104.438	1.53151	0.0541195
ENSRNOG00000006783	Neb	ensembl_havana	256.455	181.24	0.715122	0.054136
ENSRNOG00000024709	Vwde	ensembl	2.27521	7.55842	3.29445	0.0541555
ENSRNOG00000016654	Galr1	ensembl	128.418	176.555	1.38904	0.0542755
ENSRNOG00000061942	Rn60_X_0778.1	havana	4.02358	0.657572	0.179145	0.054389
ENSRNOG00000032569	Lingo3	ensembl	58.8304	82.9649	1.42606	0.0544179
ENSRNOG00000047466	Bdnf	ensembl	370.272	250.86	0.684327	0.0544504
ENSRNOG00000012237	Rdx	ensembl	5613.68	4277.78	0.774197	0.054489
ENSRNOG00000051193	LOC100911361	havana	375.567	271.228	0.73534	0.0545187
ENSRNOG00000025781	Sec31b	ensembl	35.7966	53.5029	1.51877	0.0545671
ENSRNOG00000009298	Fbxo44	ensembl	927.005	1180.71	1.28775	0.0546971
ENSRNOG00000011034	Tcp11x2	ensembl	8.90539	17.4748	1.95985	0.0547697
ENSRNOG00000018584	Ptma	ensembl	3444.11	4288.36	1.25945	0.0548664
ENSRNOG00000056032	AABR07035780.1	ensembl	4.09083	9.89245	2.41232	0.0549646
ENSRNOG00000009323	Fam214b	ensembl	415.426	563.461	1.36932	0.0549936
ENSRNOG00000061939	Rn60_20_0054.2	havana	44.3958	67.9328	1.53352	0.0550174
ENSRNOG00000026548	Dhrs7c	ensembl	3.11221	0	0.0393048	0.0550405
ENSRNOG00000007900	Tspan33	ensembl	407.591	534.136	1.32692	0.0551784
ENSRNOG00000060222	AC113901.1	ensembl	53.6061	34.7769	0.657776	0.0552058
ENSRNOG00000016251	Dnaja2	ensembl	3934.3	3105.55	0.800483	0.0553392
ENSRNOG00000059911	Hgsnat	ensembl	691.909	888.674	1.29786	0.0555607
ENSRNOG00000054008	Scamp5	ensembl	280.644	397.052	1.43299	0.0555706
ENSRNOG00000018101	Klc3	ensembl	12.0762	23.2381	1.90755	0.0555985
ENSRNOG00000035499	Mir124-2	ensembl	21.9737	11.2885	0.524711	0.0556633
ENSRNOG00000001049	Tpt1	ensembl	615.223	473.338	0.781368	0.0557123
ENSRNOG00000026982	LOC691921	ensembl	112.574	176.711	1.5976	0.0558255
ENSRNOG00000000954	Rpo1-3	ensembl	423.102	312.821	0.751643	0.0558904
ENSRNOG00000060237	Inhbb	ensembl	230.508	158.705	0.701135	0.0559254
ENSRNOG00000048949	LOC102549542	ensembl	708.714	538.962	0.771166	0.0559299
ENSRNOG00000032847	RGD1561636	ensembl	115.919	71.4442	0.631032	0.0560011
ENSRNOG00000032420	Hmgb1-ps3	ensembl	277.658	188.864	0.693948	0.0560266
ENSRNOG00000018528	Nrl	ensembl	0.786355	5.21201	6.25701	0.0560659
ENSRNOG00000012164	Lppr2	ensembl	292.804	482.576	1.66227	0.0561489
ENSRNOG00000010194	Ift43	ensembl	221.767	318.715	1.44651	0.0562048
ENSRNOG00000045795	LOC100911365	ensembl	137.298	193.987	1.42235	0.0562271
ENSRNOG00000004996	Zcrb1	ensembl	1057.74	814.99	0.782497	0.0562699
ENSRNOG00000002906	Nr1i2	ensembl	0.651857	4.62839	5.76266	0.0562706
ENSRNOG00000045554	LOC102551901	ensembl	846.573	1139.06	1.36594	0.0563432
ENSRNOG00000010894	Tmem203	ensembl	74.3769	107.53	1.45909	0.0564601
ENSRNOG00000000410	Nepn	ensembl	1.78158	6.219	3.33232	0.0564729
ENSRNOG00000020205	Agrn	ensembl	824.215	1043.15	1.28311	0.0565495
ENSRNOG00000037114	Rn50_10_0700.6	havana	3.83132	0.505238	0.181191	0.0567446
ENSRNOG00000014367	Ephb6	ensembl	484.877	622.43	1.30034	0.0567927
ENSRNOG00000011402	Isg20l2	ensembl	106.77	147.792	1.39808	0.0568361
ENSRNOG00000032656	Ptprt	ensembl	615.282	798.941	1.31803	0.056866
ENSRNOG00000054905	AC139608.2	ensembl	25.0922	14.0335	0.573822	0.0568821
ENSRNOG00000053201	Gpcpd1	ensembl	2792.88	2206.51	0.799782	0.0568949
ENSRNOG00000004941	Gpn1	ensembl	370.866	506.75	1.38114	0.0570062
ENSRNOG00000042340	LOC679894	ensembl	1049.63	800.649	0.774331	0.0570168
ENSRNOG00000011094	Efcab6	ensembl	53.3046	83.7794	1.59249	0.0571379
ENSRNOG00000039788	AC094217.1	ensembl	4.05596	0.338466	0.105822	0.0571516
ENSRNOG00000043441	Lin52	ensembl	57.1585	30.5582	0.540888	0.0571989
ENSRNOG00000053609	RGD1561558	ensembl	3.40493	0.319106	0.124222	0.0575181
ENSRNOG00000054961	AABR07005779.4	ensembl	2.9279	8.26423	2.81	0.0575404
ENSRNOG00000001430	Polr2j	ensembl	222.477	156.12	0.713652	0.0575538
ENSRNOG00000016665	Tpra1	ensembl	318.734	412.578	1.31001	0.0575916
ENSRNOG00000004595	Pou6f1	ensembl	170.529	224.479	1.33325	0.0577282
ENSRNOG00000010977	Igfbp6	ensembl	590.662	407.826	0.695865	0.05776
ENSRNOG00000021157	Ctss	ensembl	3519.14	2610.63	0.753782	0.0577888
ENSRNOG00000060635	AABR07052897.3	ensembl	64.237	41.1385	0.653766	0.0578376
ENSRNOG00000060010	Ss18l1	ensembl	449.577	574.319	1.29509	0.0578558
ENSRNOG00000008412	Gprc5a	ensembl	7.82086	2.68344	0.363604	0.0578655
ENSRNOG00000006472	Hspa2	ensembl	838.959	652.565	0.788974	0.057919
ENSRNOG00000013162	Zcchc12	ensembl	1909.43	2386.69	1.26668	0.0579442
ENSRNOG00000020746	Lin7b	ensembl	268.824	379.553	1.42348	0.0579467
ENSRNOG00000057497	AABR07042936.2	ensembl	434.524	301.656	0.705045	0.0579532
ENSRNOG00000029485	Psg29	ensembl	0	3.3653	28.1929	0.0579867
ENSRNOG00000021166	Ecm1	ensembl	50.3568	24.0436	0.477509	0.0582226
ENSRNOG00000016119	Fzd7	ensembl	56.9049	35.2716	0.623243	0.058354
ENSRNOG00000008046	Tmem30b	ensembl	2.07347	6.13807	2.7522	0.0584733
ENSRNOG00000027630	Casc1	ensembl	234.971	174.046	0.752098	0.0585291
ENSRNOG00000026787	Disp2	ensembl	6525.35	8598.26	1.33362	0.0585512
ENSRNOG00000020894	Lsm12	ensembl	1712.32	2159.75	1.27758	0.0588416
ENSRNOG00000027368	Ubald1	ensembl	57.2861	90.4302	1.59736	0.0588534
ENSRNOG00000054495	Cldn2	ensembl_havana	24.1027	9.19616	0.392749	0.0589602
ENSRNOG00000008288	Akirin2	ensembl	1218.83	963.929	0.801948	0.05899
ENSRNOG00000020097	Inha	ensembl	28.8253	46.5408	1.6129	0.0590016
ENSRNOG00000000121	Pigv	ensembl	68.0832	94.4392	1.41106	0.0590571
ENSRNOG00000060440	AABR07055333.1	ensembl	102.639	69.6369	0.693196	0.0592377
ENSRNOG00000004057	Ccdc88a	ensembl	6352.8	4946.94	0.79075	0.0592644
ENSRNOG00000007405	Krba1	ensembl	193.873	254.865	1.33129	0.0593144
ENSRNOG00000010408	Polr2k	ensembl	1039.15	705.83	0.690407	0.0593414
ENSRNOG00000015493	Emx1	ensembl	1.11228	4.57872	3.88065	0.0593477
ENSRNOG00000017915	Dvl2	ensembl	244.652	321.218	1.33003	0.0593482
ENSRNOG00000016973	Tmem242	ensembl	445.723	332.717	0.758264	0.0593488
ENSRNOG00000009768	LOC100912228	ensembl	790.372	1208.92	1.54613	0.0593519
ENSRNOG00000057443	LOC497963	ensembl	2.20796	7.47369	3.37965	0.0593678
ENSRNOG00000000466	Hsd17b8	ensembl_havana	150.957	211.23	1.42465	0.0593931
ENSRNOG00000013172	Nr1h3	ensembl	60.5693	87.5184	1.45664	0.0594268
ENSRNOG00000009580	Lca5	ensembl	483.96	368.727	0.773421	0.0594446
ENSRNOG00000055261	AC122968.1	ensembl	9.7552	2.78865	0.297037	0.0595147
ENSRNOG00000019082	Sbk1	ensembl	62.979	90.133	1.44717	0.0595165
ENSRNOG00000025964	AABR07021005.1	ensembl	160.09	100.275	0.638652	0.0595266
ENSRNOG00000016769	Rab38	ensembl	15.1876	26.6358	1.77045	0.0595521
ENSRNOG00000033321	Hmgb2	ensembl	106.548	72.2551	0.689638	0.0596668
ENSRNOG00000002054	Glmn	ensembl	395.053	296.616	0.762988	0.0596959
ENSRNOG00000021264	Pcna	ensembl	733.426	546.756	0.755448	0.0598374
ENSRNOG00000002680	Lamc1	ensembl_havana	1630.45	1285.16	0.799774	0.0598435
ENSRNOG00000021657	Pld6	ensembl	6.9395	15.2955	2.13911	0.0598499
ENSRNOG00000001548	Nfe2l2	ensembl	861.871	676.644	0.795418	0.0598538
ENSRNOG00000061619	LOC102553734	ensembl	0	2.22533	18.8119	0.0598742
ENSRNOG00000013208	Olr382	ensembl	0	2.22533	18.812	0.0598853
ENSRNOG00000000431	Atf6b	ensembl_havana	119.295	161.274	1.37002	0.0599665
ENSRNOG00000047884	AABR07001923.1	ensembl	190.436	136.295	0.724432	0.060022
ENSRNOG00000047971	LOC100910528	ensembl	32.6077	49.3737	1.52081	0.0601018
ENSRNOG00000014464	Tnfsf13b	ensembl_havana	3.87165	9.23599	2.35544	0.0601116
ENSRNOG00000019552	Lsm7	ensembl	194.855	264.579	1.37121	0.0601714
ENSRNOG00000047487	AABR07052692.1	ensembl	0.786355	4.15092	4.9345	0.0602273
ENSRNOG00000046621	AABR07043748.1	ensembl	1059.98	800.378	0.767995	0.0602516
ENSRNOG00000028595	Khdc1c	ensembl	1.02843	4.52319	3.90991	0.0603142
ENSRNOG00000061298	LOC103690214	ensembl	3.821	0.571725	0.179284	0.0603874
ENSRNOG00000051805	AABR07044408.1	ensembl	1.69689	5.75248	3.10801	0.0604563
ENSRNOG00000001148	Rplp0	ensembl	2252.5	1688.79	0.7615	0.0605115
ENSRNOG00000026114	Ap5b1	ensembl	94.6585	134.922	1.43912	0.0605714
ENSRNOG00000022421	Crtc1	ensembl	133.439	205.75	1.55116	0.0606525
ENSRNOG00000008862	Abcg4	ensembl	193.147	300.885	1.57073	0.0606642
ENSRNOG00000047322	Crb3	ensembl	16.7437	9.03542	0.548669	0.0607402
ENSRNOG00000052341	U6	ensembl	3.9389	9.0305	2.28639	0.0608257
ENSRNOG00000015295	Ctdsp1	ensembl_havana	333.808	503.638	1.5183	0.0609331
ENSRNOG00000015768	Cml5	ensembl	59.945	87.7783	1.46975	0.0610268
ENSRNOG00000000579	Marcks	ensembl	3346.81	4169.84	1.26069	0.0612024
ENSRNOG00000053196	Slc48a1	ensembl	3167.75	4056.65	1.2956	0.0612579
ENSRNOG00000037185	Rn60_7_1218.1	havana	63.9591	38.5601	0.617155	0.0612587
ENSRNOG00000041525	AABR07014983.1	ensembl	0.376573	3.7942	8.27123	0.0612815
ENSRNOG00000058971	SNORD113	ensembl	148.509	105.334	0.719329	0.0612831
ENSRNOG00000010789	Dusp7	ensembl	701.896	911.272	1.31187	0.0614007
ENSRNOG00000021833	Myrfl	ensembl	1.11228	5.9291	4.96504	0.0614553
ENSRNOG00000060967	AABR07013591.1	ensembl	2.984	0	0.0386188	0.0615554
ENSRNOG00000021185	Bola1	ensembl	148.692	201.969	1.37204	0.0615647
ENSRNOG00000030597	Ankrd52	ensembl	775.083	1084.07	1.41368	0.0615939
ENSRNOG00000028674	Fbxw5	ensembl	323.341	415.116	1.29888	0.0616054
ENSRNOG00000037079	Padi6	ensembl	0.376573	3.98415	8.31247	0.0616056
ENSRNOG00000057794	Adamts5	ensembl	114.453	154.51	1.36622	0.06169
ENSRNOG00000005367	Slc12a1	ensembl	22.9498	39.8873	1.78224	0.0616911
ENSRNOG00000056714	Sla	ensembl	66.6816	42.3813	0.641439	0.0617263
ENSRNOG00000038259	RGD1564425	ensembl	58.4504	91.6354	1.56876	0.0617303
ENSRNOG00000001806	Fetub	ensembl	0	2.63029	22.0228	0.0617445
ENSRNOG00000023389	Ephx4	ensembl	131.398	87.3448	0.674618	0.0617725
ENSRNOG00000024617	AI854703	ensembl	48.6352	75.2454	1.56388	0.061781
ENSRNOG00000001858	Ypel1	ensembl	44.3966	66.6794	1.50819	0.0618085
ENSRNOG00000011667	Fastk	ensembl	308.128	437.537	1.433	0.0618512
ENSRNOG00000047931	Tmsb4x	ensembl	19780.8	14635.1	0.752225	0.0618521
ENSRNOG00000002461	Nid1	ensembl	1236.04	948.243	0.775223	0.0619128
ENSRNOG00000021184	Mark2	ensembl	371.693	531.037	1.44621	0.0619198
ENSRNOG00000025608	Lrat	ensembl	439.549	307.431	0.705939	0.0619676
ENSRNOG00000009523	Rab11fip2	ensembl	1164.82	906.323	0.790568	0.0619775
ENSRNOG00000060061	Sowaha	ensembl	30.3403	48.1853	1.61398	0.0620582
ENSRNOG00000004741	Rpl19	ensembl	1173.5	874.848	0.756832	0.0621411
ENSRNOG00000021088	Tmod4	ensembl	113.954	79.6177	0.707071	0.0621685
ENSRNOG00000001225	Fam207a	ensembl	308.045	222.089	0.733047	0.0621886
ENSRNOG00000003853	Scoc	ensembl	4242.1	3379.69	0.80857	0.0623148
ENSRNOG00000018069	Ngdn	ensembl	858.194	658.468	0.778173	0.0623244
ENSRNOG00000034191	Fmo1	ensembl	95.5968	59.6291	0.626038	0.0625142
ENSRNOG00000018452	Unc13a	ensembl	629.07	827.674	1.33248	0.0625226
ENSRNOG00000018526	Dlg4	ensembl	2925.91	3626.82	1.2556	0.0627795
ENSRNOG00000000701	Iscu	ensembl	3069.16	2281.35	0.755208	0.0627818
ENSRNOG00000050841	Ache	ensembl	3344.37	4229.75	1.27988	0.0628321
ENSRNOG00000055079	Ndufaf2	ensembl	607.456	456.118	0.763754	0.0628943
ENSRNOG00000017828	Egr3	ensembl	4.1066	9.74615	2.42433	0.0629463
ENSRNOG00000014296	Syt10	ensembl	98.3723	139.474	1.43996	0.0629802
ENSRNOG00000012344	Slc7a9	ensembl	3.64701	9.86214	2.65674	0.0630503
ENSRNOG00000006001	Luc7l2	ensembl	3587.87	2843.53	0.804092	0.0630808
ENSRNOG00000015259	Pth2r	ensembl	40.5053	66.0629	1.64608	0.0631357
ENSRNOG00000059961	Rapgef3	ensembl	571.875	434.594	0.770725	0.0631564
ENSRNOG00000005209	Spred1	ensembl	1404.53	1085.17	0.783805	0.0631689
ENSRNOG00000051656	U6	ensembl	0.325929	2.9167	6.44968	0.0632942
ENSRNOG00000032542	Rps29	ensembl	1238.4	957.099	0.785183	0.0633264
ENSRNOG00000005157	Rbbp7	ensembl	3045.19	2410.94	0.80278	0.063406
ENSRNOG00000018775	Cystm1	ensembl	151.607	201.921	1.34526	0.0634619
ENSRNOG00000016284	Dmrt3	ensembl	0	2.65916	23.3931	0.0634888
ENSRNOG00000055323	AABR07063421.1	ensembl	26.4036	48.4078	1.82368	0.0635316
ENSRNOG00000046705	Snx3	ensembl_havana	1753.17	2396.99	1.38005	0.0635421
ENSRNOG00000028896	LOC100911545	ensembl	432.304	309.942	0.723336	0.0635471
ENSRNOG00000033791	Apc2	ensembl	2668.72	3474.14	1.31756	0.0635909
ENSRNOG00000014427	Chrnb4	ensembl	7.80971	17.9925	2.28978	0.0636095
ENSRNOG00000057855	F5	ensembl	122.702	55.6229	0.459508	0.063624
ENSRNOG00000046227	Tprg1l	ensembl	2339.09	2996.33	1.29593	0.0637872
ENSRNOG00000048958	Rpl37-ps1	ensembl	80.0732	47.8938	0.612969	0.0639352
ENSRNOG00000039439	AC121204.1	ensembl	14.1798	4.55936	0.335377	0.0640199
ENSRNOG00000018246	Tdp2	ensembl	775.558	577.953	0.756882	0.0640304
ENSRNOG00000048760	AABR07047219.1	ensembl	334.977	235.602	0.716238	0.0640323
ENSRNOG00000004518	Cacnb1	ensembl	344.442	473.543	1.39107	0.0642275
ENSRNOG00000017100	LOC100910779	ensembl	1419.59	1079.95	0.772853	0.0642894
ENSRNOG00000056413	Spata31d3	ensembl	0.393178	4.14251	8.71345	0.0643285
ENSRNOG00000026055	Neurod6	ensembl	535.719	358.24	0.674529	0.0643919
ENSRNOG00000011022	Mep1a	ensembl	8.09614	15.373	1.90798	0.0644166
ENSRNOG00000010244	Sarm1	ensembl	340.905	471.953	1.39867	0.0644304
ENSRNOG00000036971	RGD1566320	ensembl	966.739	718.491	0.756177	0.0644887
ENSRNOG00000019697	Ankrd28	ensembl	2429.1	1950.46	0.813659	0.064508
ENSRNOG00000012362	Cacng3	ensembl	255.542	336.518	1.33187	0.0645421
ENSRNOG00000002525	Ptgs2	ensembl	135.084	97.7493	0.73294	0.064655
ENSRNOG00000020307	RGD1309139	ensembl	5.13586	11.4796	2.21597	0.0647268
ENSRNOG00000054283	7SK	ensembl	10.013	4.08792	0.429648	0.0647621
ENSRNOG00000021840	Cped1	ensembl	215.422	145.841	0.683119	0.0647837
ENSRNOG00000020519	Olfm2	ensembl	372.649	548.543	1.48466	0.0648745
ENSRNOG00000024241	Cdc23	ensembl	639.927	855.461	1.34979	0.064906
ENSRNOG00000031331	Fpr3	ensembl	2.70243	0	0.0448417	0.0649156
ENSRNOG00000050108	LOC100911319	ensembl	39.4799	60.2103	1.53259	0.0649554
ENSRNOG00000042838	Junb	ensembl	111.766	153.789	1.38955	0.0651055
ENSRNOG00000060482	Iqcj	ensembl	98.1828	59.8853	0.616494	0.0651056
ENSRNOG00000007219	LOC103692716	ensembl	23393.5	18284.5	0.792573	0.0651483
ENSRNOG00000056484	AABR07000978.1	ensembl	2.77597	8.18076	2.79387	0.065234
ENSRNOG00000050181	Chid1	ensembl	167.931	116.216	0.703359	0.0653259
ENSRNOG00000023226	S100a10	ensembl	1383.85	1037.17	0.762499	0.0653613
ENSRNOG00000054720	SNORA17	ensembl	0	2.24469	18.969	0.0653769
ENSRNOG00000019023	Tars	ensembl	1617.14	1240.47	0.779185	0.0654089
ENSRNOG00000021012	Rfx5	ensembl	517.836	659.47	1.2899	0.0654538
ENSRNOG00000047786	Ogn	ensembl	266.545	151.917	0.57283	0.0654556
ENSRNOG00000006025	Lamb3	ensembl	294.104	174.87	0.599266	0.065459
ENSRNOG00000061031	Fzd8	ensembl	21.0203	37.5109	1.77813	0.0654642
ENSRNOG00000049097	Rpl7a	ensembl	135.593	98.213	0.7359	0.0655047
ENSRNOG00000055911	LOC100361259	ensembl	353.227	256.13	0.737864	0.0655231
ENSRNOG00000058709	AABR07032095.1	ensembl	2.97771	8.355	2.78944	0.0656058
ENSRNOG00000055573	Rn50_7_1407.2	havana	1.07908	4.29833	3.64701	0.0657195
ENSRNOG00000032436	Tmod3	ensembl	560.402	427.104	0.774933	0.0657239
ENSRNOG00000012966	Acadl	ensembl	308.842	226.21	0.745113	0.0657328
ENSRNOG00000054180	U6	ensembl	12.7716	6.32421	0.505631	0.0657714
ENSRNOG00000052122	Rn50_20_0056.5	havana	25.1119	14.2113	0.571216	0.0658349
ENSRNOG00000007395	Baat	ensembl	4.41593	10.5778	2.37882	0.0658583
ENSRNOG00000059280	U5	ensembl	0.325929	3.20201	6.85395	0.0658645
ENSRNOG00000024494	AABR07056633.1	ensembl	7.11836	15.0588	2.13776	0.0658959
ENSRNOG00000035481	Mir218-2	ensembl	3.08529	8.93624	2.78611	0.066
ENSRNOG00000030049	Znhit6	ensembl	488.486	359.998	0.750818	0.0660799
ENSRNOG00000007256	Necab1	ensembl	400.838	505.729	1.27811	0.0661522
ENSRNOG00000003048	Tiprl	ensembl	799.206	621.259	0.787947	0.0662284
ENSRNOG00000024170	Phf5a	ensembl	471.678	363.186	0.780328	0.0662796
ENSRNOG00000008035	Cinp	ensembl	304.625	406.179	1.35843	0.0662801
ENSRNOG00000046081	AABR07015079.1	ensembl	24.4266	52.3532	2.12154	0.0663071
ENSRNOG00000057514	AABR07015080.1	ensembl	20.0708	45.9419	2.2725	0.0663221
ENSRNOG00000020663	Pygo2	ensembl	176.397	235.57	1.35112	0.0663391
ENSRNOG00000020714	Trpm4	ensembl	48.3641	73.1576	1.52904	0.0663486
ENSRNOG00000009640	Psmf1	ensembl	442.482	586.661	1.3408	0.0664032
ENSRNOG00000039191	Yjefn3	ensembl	1.11228	4.16536	3.58291	0.0664337
ENSRNOG00000009957	Slc25a13	ensembl	322.228	201.366	0.63894	0.0664376
ENSRNOG00000019840	Mdp1	ensembl	314.687	218.338	0.702772	0.0665348
ENSRNOG00000011285	Zdhhc22	ensembl	437.691	560.109	1.29389	0.0665541
ENSRNOG00000033528	Tll1	ensembl	296.415	189.293	0.644261	0.0665835
ENSRNOG00000058752	Popdc2	ensembl	20.0648	31.141	1.56688	0.0666089
ENSRNOG00000010406	Cel	ensembl	0.977786	5.3004	4.68761	0.0666934
ENSRNOG00000020300	Lsp1	ensembl	170.644	125.469	0.743769	0.0667068
ENSRNOG00000027592	Rerg	ensembl	226.732	305.4	1.36474	0.0667701
ENSRNOG00000028014	Cryzl1	ensembl	177.31	236.896	1.34934	0.0669034
ENSRNOG00000052510	Wnt10a	ensembl	3.59636	0.591085	0.19444	0.0670007
ENSRNOG00000026919	RGD1565367	ensembl	6.57408	13.4558	2.04182	0.0670159
ENSRNOG00000017165	Akr1e2	ensembl	572.904	445.92	0.790678	0.0670282
ENSRNOG00000005257	Prkaca	ensembl	3133.43	3951.83	1.27597	0.0671129
ENSRNOG00000015699	Lman2l	ensembl	294.999	387.483	1.32906	0.0671291
ENSRNOG00000010475	Casp3	ensembl	556.377	420.178	0.766877	0.067144
ENSRNOG00000026319	Akap9	ensembl	8638.45	6778.38	0.797146	0.0671581
ENSRNOG00000017840	Pik3c3	ensembl	2339.78	1869.01	0.811099	0.0671628
ENSRNOG00000016581	Serpinb1a	ensembl	200.8	141.267	0.713795	0.0671797
ENSRNOG00000019349	Sf3a2	ensembl	31.8205	51.2584	1.62524	0.0671869
ENSRNOG00000009850	St3gal4	ensembl	1171.04	918.454	0.795765	0.0672051
ENSRNOG00000056731	RGD1561897	ensembl	2955.63	2302.7	0.791953	0.0672192
ENSRNOG00000019271	Ulk4	ensembl	43.5565	64.6418	1.49614	0.0672574
ENSRNOG00000007527	Tm2d1	ensembl	585.061	763.674	1.32077	0.0674095
ENSRNOG00000060360	U6	ensembl	22.0149	12.6652	0.585173	0.0675048
ENSRNOG00000019615	Colq	ensembl	17.6376	28.2205	1.6181	0.0675229
ENSRNOG00000061182	Gabre	ensembl	59.0774	85.4287	1.46421	0.0676089
ENSRNOG00000055892	AABR07043395.1	ensembl	32.1085	17.3711	0.551548	0.0677099
ENSRNOG00000002937	Ren	ensembl_havana	6.29796	12.6375	2.03738	0.0677401
ENSRNOG00000014251	Capn5	ensembl	657.18	847.746	1.3061	0.0677433
ENSRNOG00000038489	Sumo3	ensembl	759.413	965.63	1.28623	0.0677453
ENSRNOG00000004265	RGD1559731	ensembl	19.8456	10.9983	0.571844	0.0678124
ENSRNOG00000047719	Rmnd5b	ensembl	75.734	104.597	1.40039	0.0679192
ENSRNOG00000017108	Syngr1	ensembl_havana	608.095	912.405	1.51229	0.068015
ENSRNOG00000004262	LOC102546716	ensembl	1156.3	887.806	0.779314	0.0680564
ENSRNOG00000060492	LOC103690190	ensembl	8.51624	1.88687	0.236058	0.0680662
ENSRNOG00000055638	AABR07028381.1	ensembl	14.0587	7.28152	0.521641	0.0680666
ENSRNOG00000049110	Dpm2	ensembl	165.439	236.614	1.44497	0.0681189
ENSRNOG00000059601	AC127076.2	ensembl	11.5643	21.35	1.84391	0.0681389
ENSRNOG00000021480	Rad9b	ensembl	40.4974	62.8357	1.55837	0.068148
ENSRNOG00000012189	Lect2	ensembl	0.719106	4.28738	5.22188	0.0682423
ENSRNOG00000059765	Asic1	ensembl	863.347	1052.93	1.23676	0.0682525
ENSRNOG00000024567	LOC683674	ensembl	155.997	221.847	1.43289	0.068358
ENSRNOG00000008989	Cryl1	ensembl	162.28	213.193	1.32756	0.0683967
ENSRNOG00000006526	Sema3c	ensembl	1086.33	1404.47	1.3147	0.068401
ENSRNOG00000014259	Mycl	ensembl	99.8182	133.437	1.35613	0.0686146
ENSRNOG00000039994	Upf3b	ensembl_havana	1269.76	968.145	0.774759	0.068618
ENSRNOG00000035627	Mir325	ensembl	47.5841	30.082	0.646154	0.0686362
ENSRNOG00000047781	Slc25a23	ensembl	294.354	400.698	1.37844	0.0686454
ENSRNOG00000060329	Emb	ensembl	517.23	396.574	0.777651	0.0686582
ENSRNOG00000029592	Srsf11	ensembl	2283.86	1803.16	0.801686	0.0687218
ENSRNOG00000007076	LOC691422	ensembl	221.895	159.279	0.729427	0.0687433
ENSRNOG00000054698	AABR07066792.1	ensembl	81.5604	111.537	1.38431	0.0687642
ENSRNOG00000053849	AABR07064099.1	ensembl	26.5209	15.3368	0.582244	0.0687657
ENSRNOG00000002394	Tpr	ensembl	7686.67	6044.08	0.798736	0.0687717
ENSRNOG00000051638	U2	ensembl	80.4182	48.9101	0.619495	0.0688045
ENSRNOG00000053671	U7	ensembl	0.702502	3.59363	4.44401	0.0688164
ENSRNOG00000057824	AABR07057617.1	ensembl	2.81001	7.74804	2.65165	0.0688726
ENSRNOG00000061875	7SK	ensembl	5.90478	1.66805	0.318548	0.0690627
ENSRNOG00000009761	Tmod1	ensembl	501.15	637.829	1.2895	0.0691045
ENSRNOG00000058847	AABR07044001.4	ensembl	12.63	5.84674	0.472787	0.0693245
ENSRNOG00000046196	Icos	ensembl	27.4584	41.0117	1.51498	0.0693425
ENSRNOG00000019293	LOC100911840	ensembl	56.6391	83.7501	1.49556	0.0693449
ENSRNOG00000032635	LOC100910370	ensembl	1452.62	1131.02	0.790258	0.0694192
ENSRNOG00000020906	Pola2	ensembl	49.2026	70.1543	1.44855	0.0694303
ENSRNOG00000030666	RT1-T18	ensembl_havana	0.376573	3.59856	7.54552	0.0694317
ENSRNOG00000009350	Sez6	ensembl	835.44	1067.05	1.29514	0.0694603
ENSRNOG00000024801	Slc35a2	ensembl	279.751	376.381	1.36067	0.0695152
ENSRNOG00000037687	Rspo2	ensembl	272.649	356.779	1.32583	0.0697913
ENSRNOG00000025806	Prr3	ensembl_havana	296.453	393.713	1.34111	0.0697944
ENSRNOG00000061533	Zfp945	ensembl	316.554	237.831	0.762383	0.0697969
ENSRNOG00000042264	Pcdhgb1	ensembl	36.7246	23.4377	0.647257	0.0698227
ENSRNOG00000053202	SNORD116	ensembl	20.5884	11.4131	0.550309	0.0699083
ENSRNOG00000022323	Tcea1	ensembl_havana	522.598	664.183	1.28382	0.0699503
ENSRNOG00000047922	LOC102557117	ensembl	14.9858	7.77232	0.513736	0.0700348
ENSRNOG00000019044	Adam30	ensembl	3.43814	0.338466	0.12533	0.070075
ENSRNOG00000052536	U6	ensembl	7.31062	2.54444	0.349932	0.0702137
ENSRNOG00000010753	Aig1	ensembl	1249.35	986.36	0.800542	0.0702983
ENSRNOG00000023546	Hspb1	ensembl	379.057	506.024	1.359	0.0703517
ENSRNOG00000015402	Guca1a	ensembl	3.73086	0.591085	0.191652	0.0704012
ENSRNOG00000006487	Casp8ap2	ensembl_havana	1404.02	1103.62	0.797513	0.0704087
ENSRNOG00000013940	Rn50_2_1476.1	ensembl_havana	2.68583	7.12919	2.72508	0.0704747
ENSRNOG00000042975	Tmem45al	ensembl	12.4108	5.64727	0.470017	0.0705136
ENSRNOG00000012087	Ufsp2	ensembl	1784.81	1371.99	0.779674	0.0705452
ENSRNOG00000007398	Zfp691	ensembl	104.482	138.795	1.34954	0.0705513
ENSRNOG00000019999	Lypd3	ensembl	12.2099	21.1121	1.72768	0.0705541
ENSRNOG00000039848	Ak6	ensembl_havana	243.914	180.379	0.748098	0.0706053
ENSRNOG00000007270	Il12rb2	ensembl	366.643	282.023	0.780453	0.0706458
ENSRNOG00000001103	Sdk1	ensembl_havana	122.437	164.462	1.35814	0.0706964
ENSRNOG00000020238	Plekhh3	ensembl	84.1558	115.933	1.38884	0.0707251
ENSRNOG00000007412	Dok1	ensembl	14.1663	25.0356	1.7472	0.0707904
ENSRNOG00000029574	Rps4x-ps9	ensembl	4707.62	3644.06	0.784581	0.0708047
ENSRNOG00000056237	SNORD57	ensembl	2.97771	0.338466	0.14173	0.070805
ENSRNOG00000061082	U1	ensembl	24.0701	13.5973	0.574114	0.0708282
ENSRNOG00000007017	Tmc2	ensembl	0.393178	5.32961	11.1254	0.070842
ENSRNOG00000020044	Mob2	ensembl	536.608	694.745	1.30673	0.0708575
ENSRNOG00000007738	Hm13	ensembl	760.153	948.936	1.26724	0.0709438
ENSRNOG00000051399	Col10a1	ensembl	11.463	21.7006	1.85945	0.0710179
ENSRNOG00000027489	Mn1	ensembl	73.3853	101.803	1.40613	0.071035
ENSRNOG00000004751	Jkamp	ensembl	1342.82	1699.15	1.27982	0.0711356
ENSRNOG00000029145	AY172581.2	insdc	2371.49	3341.66	1.42221	0.0711488
ENSRNOG00000003635	Disp1	ensembl	159.379	214.568	1.35705	0.0711519
ENSRNOG00000016179	Acoxl	ensembl	5.11843	11.7287	2.26847	0.0712803
ENSRNOG00000047148	LOC684179	ensembl	2.66922	0	0.0449412	0.0712912
ENSRNOG00000008517	Cdc42ep1	ensembl	409.76	562.082	1.3851	0.0713611
ENSRNOG00000028884	Atp5l	ensembl	1563.81	1214.65	0.787466	0.0714287
ENSRNOG00000002031	Naa11	ensembl	24.347	37.7664	1.55807	0.0714426
ENSRNOG00000031216	Zfp347	ensembl	254.24	180.357	0.717866	0.0714613
ENSRNOG00000005568	Pcnxl4	ensembl	1135.6	1441.67	1.28277	0.0715493
ENSRNOG00000056767	Potea	ensembl_havana	10.5304	18.6281	1.76701	0.0715576
ENSRNOG00000003517	Tbx2	ensembl	17.8631	28.6786	1.61821	0.0715865
ENSRNOG00000004232	G2e3	ensembl	265.582	201.205	0.768875	0.0716145
ENSRNOG00000016879	Ldlrad4	ensembl	683.212	535.084	0.793675	0.0716255
ENSRNOG00000008492	Cfap45	ensembl	7.05111	14.2379	2.03213	0.0716467
ENSRNOG00000055221	Acot1	ensembl	31.5166	50.9086	1.61657	0.0716602
ENSRNOG00000059308	AABR07047750.2	ensembl	2.71903	0	0.0447329	0.0717458
ENSRNOG00000058368	SNORA17	ensembl	2.71903	0	0.0447328	0.0717595
ENSRNOG00000030520	Sarnp	ensembl	2191.9	1599.14	0.740388	0.0717638
ENSRNOG00000055921	AABR07062751.1	ensembl	0.325929	2.81642	6.06923	0.0717825
ENSRNOG00000026080	LOC688390	ensembl	15.9225	28.0382	1.77006	0.071784
ENSRNOG00000017916	Rexo1	ensembl	117.664	167.938	1.44188	0.0718047
ENSRNOG00000028288	Clrn3	ensembl	0	3.02683	25.4183	0.0719881
ENSRNOG00000018229	Slc45a1	ensembl	991.422	1272.63	1.29925	0.0719923
ENSRNOG00000054769	U2	ensembl	92.6962	53.8239	0.59199	0.0721398
ENSRNOG00000006393	Sirt6	ensembl	231.61	317.389	1.3849	0.0722304
ENSRNOG00000051384	AABR07002337.1	ensembl	44.3162	27.1439	0.619546	0.0722392
ENSRNOG00000001769	Tnk2	ensembl	3211.15	3947.82	1.24442	0.0722478
ENSRNOG00000017918	Iglon5	ensembl	54.4342	97.1603	1.80426	0.0722659
ENSRNOG00000048561	Hprt1	ensembl	989.924	752.854	0.770195	0.0722904
ENSRNOG00000017712	Cartpt	ensembl	492.139	664.823	1.37454	0.0723591
ENSRNOG00000016110	Kcnk12	ensembl	31.2184	47.8426	1.5381	0.0725207
ENSRNOG00000001187	Oasl	ensembl	14.1488	23.8849	1.67912	0.0725323
ENSRNOG00000048843	Tsfm	ensembl	198.62	292.321	1.48227	0.07268
ENSRNOG00000006542	Atp6v0c	ensembl	3267.71	4998.54	1.5438	0.0726999
ENSRNOG00000003486	Mnda	ensembl	19.4478	10.3168	0.531391	0.0727497
ENSRNOG00000047776	AABR07027753.2	ensembl	16.693	27.3419	1.64592	0.0727666
ENSRNOG00000013962	Magi2	ensembl	1455.09	1758.2	1.22528	0.072821
ENSRNOG00000020021	Brsk2	ensembl	880.171	1116.69	1.28418	0.0728314
ENSRNOG00000009184	Foxp1	ensembl	385.355	287.784	0.754354	0.0728437
ENSRNOG00000061819	AABR07072515.1	ensembl	5.54565	1.75389	0.344192	0.0728668
ENSRNOG00000012236	Hddc3	ensembl	1024.75	1344.53	1.32513	0.0728769
ENSRNOG00000057126	AABR07050134.1	ensembl	15.8291	27.1389	1.69403	0.0729037
ENSRNOG00000046492	Tmem194	ensembl	9.72033	18.0477	1.92599	0.072927
ENSRNOG00000011373	Reep4	ensembl	58.5961	86.4064	1.48267	0.0729516
ENSRNOG00000019161	Cpeb1	ensembl	1116.76	1397.12	1.26659	0.0729534
ENSRNOG00000058625	AABR07029221.1	ensembl	0.977786	4.70329	4.05853	0.072961
ENSRNOG00000042276	Trappc2	ensembl	870.533	1092.93	1.27351	0.0730147
ENSRNOG00000001170	Cox6a1	ensembl	3561.54	2847.32	0.811997	0.0730394
ENSRNOG00000056969	AABR07008911.1	ensembl	53.4471	35.8249	0.678245	0.0731216
ENSRNOG00000038218	Ndufc1	ensembl	358.769	229.247	0.653867	0.0731914
ENSRNOG00000008314	Orc3	ensembl	833.127	650.023	0.791136	0.0733458
ENSRNOG00000001611	Rpl24	ensembl	3211.14	2397.38	0.758201	0.0733725
ENSRNOG00000017904	Nol7	ensembl	1235.64	980.436	0.805959	0.0734256
ENSRNOG00000001324	Asmt	ensembl	8.83897	16.4028	1.82417	0.0734451
ENSRNOG00000026328	Gpr137c	ensembl	254.953	334.136	1.32605	0.0735836
ENSRNOG00000012090	Slc16a8	ensembl	8.17051	16.0389	1.92534	0.0736137
ENSRNOG00000005660	Fam110c	ensembl	10.4806	4.41798	0.435143	0.0736977
ENSRNOG00000047123	Tstd1	ensembl	17.572	9.1357	0.529627	0.0737296
ENSRNOG00000045933	LOC102556148	ensembl	17.7887	28.5544	1.61426	0.0737877
ENSRNOG00000020531	Fen1	ensembl	283.403	201.612	0.725858	0.0738028
ENSRNOG00000046918	Apoo	ensembl_havana	1066.83	828.956	0.786992	0.0738497
ENSRNOG00000021145	Gpr137	ensembl	953.537	1419.33	1.50116	0.073988
ENSRNOG00000061253	AABR07006038.2	ensembl	12.5224	4.67552	0.385726	0.0741385
ENSRNOG00000006355	Akap8l	ensembl	681.505	535.763	0.797833	0.074282
ENSRNOG00000001415	Ap1s1	ensembl	521.893	666.781	1.29083	0.07431
ENSRNOG00000011953	Supt16h	ensembl_havana	3998.26	3125.62	0.793696	0.0743121
ENSRNOG00000019908	Lamtor2	ensembl	591.079	456.049	0.783009	0.0745894
ENSRNOG00000019374	Csk	ensembl	272.807	397.19	1.47027	0.0747166
ENSRNOG00000030210	Fndc1	ensembl	88.2846	56.9009	0.647754	0.0747808
ENSRNOG00000004581	Zdhhc9	ensembl	1534.97	1932.61	1.27324	0.0747971
ENSRNOG00000020296	LOC103693430	ensembl	41.1468	92.1293	2.30748	0.0749625
ENSRNOG00000033979	Gm5471	ensembl	223.477	156.816	0.714414	0.074984
ENSRNOG00000031315	Rpl36a-ps2	ensembl	1306.78	993.606	0.772273	0.0749948
ENSRNOG00000007440	Dzank1	ensembl	3506.73	4271.15	1.23311	0.0750238
ENSRNOG00000017692	Ppp1r37	ensembl	626.818	780.291	1.25876	0.0752308
ENSRNOG00000050369	LOC102553845	ensembl	5.3439	1.75389	0.348717	0.0752432
ENSRNOG00000013756	Snrnp48	ensembl	698.388	500.521	0.729605	0.0753232
ENSRNOG00000054183	MIMT1_1	ensembl	97.1453	64.8022	0.679793	0.0753312
ENSRNOG00000005538	Psmd11	ensembl	2011.55	2495.82	1.25712	0.0756039
ENSRNOG00000027940	Lppr3	ensembl	251.403	330.678	1.3294	0.075649
ENSRNOG00000019394	Mpv17l2	ensembl	30.7439	49.884	1.63103	0.0756615
ENSRNOG00000032148	RGD1565170	ensembl	6.31623	2.13949	0.354129	0.0757494
ENSRNOG00000028415	Cdc20	ensembl	29.6686	47.4326	1.59304	0.07578
ENSRNOG00000031213	Slc39a11	ensembl	144.285	188.754	1.3223	0.0759349
ENSRNOG00000017114	Synj2	ensembl	860.032	680.788	0.802868	0.075984
ENSRNOG00000010918	Cebpa	ensembl	26.82	40.9695	1.52763	0.0760234
ENSRNOG00000034130	Hmg1l1	ensembl	877.191	647.206	0.749117	0.07608
ENSRNOG00000055178	AABR07058124.3	ensembl	4.86687	11.303	2.25614	0.0761022
ENSRNOG00000002835	Luc7l3	ensembl	5911.21	4543.19	0.781112	0.0762715
ENSRNOG00000023603	Amer3	ensembl	71.0433	106.037	1.51193	0.0763259
ENSRNOG00000029500	Tapbp	ensembl_havana	181.329	259.957	1.44657	0.0764115
ENSRNOG00000012742	Irx2	ensembl	149.68	95.9097	0.645048	0.076452
ENSRNOG00000055068	Ppial4d	ensembl_havana	6879.89	5466.25	0.806623	0.0764768
ENSRNOG00000053007	Rn50_9_0737.3	havana	169.18	121.096	0.725335	0.0764853
ENSRNOG00000050630	AABR07070043.1	ensembl	1450.07	2027.23	1.41136	0.0765966
ENSRNOG00000061928	Myo1e	ensembl	867.152	642.257	0.753496	0.0767662
ENSRNOG00000007816	AC131483.1	ensembl	19.5728	10.3977	0.534113	0.0767778
ENSRNOG00000052005	AABR07028945.1	ensembl	1.11228	4.09887	3.55065	0.0768152
ENSRNOG00000001878	Klhl22	ensembl	756.102	960.071	1.28322	0.0770292
ENSRNOG00000004168	Slc35e4	ensembl	188.096	241.256	1.30164	0.0770425
ENSRNOG00000042062	AC105662.1	ensembl	41.2936	74.7345	1.81739	0.0773531
ENSRNOG00000012162	Mpdu1	ensembl	612.998	815.326	1.34337	0.0774154
ENSRNOG00000053468	Tuba1b	ensembl	9015.33	11471.5	1.28762	0.0774757
ENSRNOG00000060008	Cog7	ensembl	329.913	424.594	1.30216	0.0774854
ENSRNOG00000032206	Cntnap5b	ensembl	198.359	258.38	1.32482	0.0775261
ENSRNOG00000060946	Cask	ensembl	987.487	751.404	0.773464	0.0775645
ENSRNOG00000054560	Sh2d3c	ensembl	140.303	205.837	1.48197	0.0777033
ENSRNOG00000016245	Neto2	ensembl	877.833	671.395	0.772608	0.0777503
ENSRNOG00000013343	Myg1	ensembl	608.553	791.16	1.31318	0.0777549
ENSRNOG00000030364	LOC686074	ensembl	1833.66	1409.06	0.78066	0.0777835
ENSRNOG00000014555	Aox3	ensembl	162.83	104.345	0.64423	0.0778057
ENSRNOG00000048273	Apod	ensembl	16221.2	12958.6	0.810661	0.0778346
ENSRNOG00000018111	Slc12a5	ensembl	1659.33	2126.11	1.30075	0.07794
ENSRNOG00000016036	Rprd1a	ensembl	683.208	537.388	0.797333	0.078
ENSRNOG00000005336	Prss27	ensembl	1.74754	5.22788	2.77883	0.0780922
ENSRNOG00000050201	Slc29a2	ensembl	54.4	83.0117	1.55076	0.0780942
ENSRNOG00000015019	Spg21	ensembl	632.042	771.498	1.23656	0.0782947
ENSRNOG00000012307	Mybpc3	ensembl	4.5069	10.776	2.33602	0.0783795
ENSRNOG00000016543	Trim63	ensembl	8.5969	16.0583	1.8418	0.0784041
ENSRNOG00000027103	Gpr151	ensembl	22.1565	13.0146	0.593141	0.0784438
ENSRNOG00000000250	Jmjd6	ensembl	221.155	166.108	0.762005	0.0785247
ENSRNOG00000051046	Rn50_10_0706.2	havana	0	2.18661	18.609	0.0785389
ENSRNOG00000014870	Slc13a5	ensembl	150.565	211.47	1.41312	0.0785459
ENSRNOG00000048272	Rn50_2_2279.3	ensembl_havana	0	2.18661	18.609	0.078561
ENSRNOG00000006114	Cfap69	ensembl	313.985	240.261	0.776406	0.0786338
ENSRNOG00000009756	Pacsin2	ensembl	2704.69	2190.05	0.820759	0.0786495
ENSRNOG00000060623	Fam3a	ensembl	214.843	275.922	1.29787	0.0786801
ENSRNOG00000031593	Nanos3	ensembl	10.7147	4.90878	0.467697	0.0787191
ENSRNOG00000058564	Tcte2	ensembl	10.3381	18.9328	1.84294	0.0788426
ENSRNOG00000010233	Cald1	ensembl	2012.85	1618.52	0.814299	0.0789032
ENSRNOG00000019958	Tmem151b	ensembl	457.696	574.236	1.26985	0.0789134
ENSRNOG00000049326	Tmem234	ensembl	88.1889	122.165	1.39549	0.0789454
ENSRNOG00000055836	AABR07000402.1	ensembl	24.6458	48.3448	1.94468	0.0790278
ENSRNOG00000011140	Fam213a	ensembl	4084.46	3185.61	0.790804	0.0790393
ENSRNOG00000012868	Uaca	ensembl	1082.27	840.259	0.786768	0.0790499
ENSRNOG00000010959	Klhl25	ensembl	81.5419	116.345	1.43906	0.0791202
ENSRNOG00000011914	Dtnb	ensembl	1035.59	1272.49	1.24278	0.0791252
ENSRNOG00000008615	Mal2	ensembl	832.342	1025.88	1.24822	0.0791964
ENSRNOG00000055697	7SK	ensembl	0.753147	4.37577	5.26083	0.0792359
ENSRNOG00000014790	Cryga	ensembl	5.32018	13.0499	2.50308	0.0792609
ENSRNOG00000043120	Hpse2	ensembl	22.987	38.4795	1.66477	0.0792627
ENSRNOG00000055721	Rnf128	ensembl	395.551	488.2	1.25186	0.0792709
ENSRNOG00000024000	Cd22	ensembl	3.73086	9.59763	2.55015	0.0792946
ENSRNOG00000048719	Dtnbp1	ensembl	280.646	378.581	1.36172	0.079374
ENSRNOG00000029423	AABR07052519.1	ensembl	114.779	81.5902	0.723557	0.079449
ENSRNOG00000025121	Pla2g3	ensembl	133.94	177.239	1.34379	0.0795575
ENSRNOG00000031665	Ace2	ensembl	127.753	91.7502	0.730266	0.0795674
ENSRNOG00000060561	Gdpd1	ensembl	459.933	577.793	1.27729	0.0796344
ENSRNOG00000052520	U6atac	ensembl	0.702502	4.05412	4.92773	0.0797327
ENSRNOG00000028211	Akap17a	ensembl	630.715	484.24	0.781142	0.0797839
ENSRNOG00000033209	Bmp8b	ensembl	0	2.09236	18.1443	0.0798597
ENSRNOG00000033262	Reep6	ensembl	97.7789	64.5123	0.669431	0.0798805
ENSRNOG00000016102	Ebf3	ensembl	213.285	290.743	1.38473	0.0799323
ENSRNOG00000058009	SNORA70	ensembl	4.96733	10.4835	2.04883	0.0799401
ENSRNOG00000026196	Lrrd1	ensembl	7.13496	2.43083	0.359749	0.079943
ENSRNOG00000000098	Rnf115	ensembl	1701.8	1341.94	0.799144	0.0799529
ENSRNOG00000021106	Gramd1a	ensembl	630.219	783.445	1.26191	0.0799726
ENSRNOG00000019857	Gng7	ensembl	196.041	268.848	1.38549	0.0799965
ENSRNOG00000059428	Rps2	ensembl	4.75929	11.1579	2.32215	0.0800261
ENSRNOG00000061945	Rn60_16_0690.2	havana	413.124	295.551	0.726185	0.080035
ENSRNOG00000010597	Slc5a7	ensembl	4900.05	6294.39	1.30667	0.0801156
ENSRNOG00000048723	Pros1	ensembl	418.574	318.549	0.770316	0.0801921
ENSRNOG00000060364	AC095937.1	ensembl	0	2.53603	21.6034	0.0802193
ENSRNOG00000026128	Cpne8	ensembl	62.9905	94.7961	1.51024	0.0804583
ENSRNOG00000060211	AABR07058699.2	ensembl	1406.58	1127.01	0.811951	0.0805617
ENSRNOG00000061981	Rn60_6_0143.1	havana	20.783	12.0137	0.595801	0.0805694
ENSRNOG00000046748	Mir1912	ensembl	3.02836	7.85817	2.59263	0.0806177
ENSRNOG00000004239	LOC100362999	ensembl	6175.21	4759.82	0.783038	0.0806423
ENSRNOG00000016723	Phpt1	ensembl	913.38	706.807	0.78678	0.0806613
ENSRNOG00000012748	Vamp8	ensembl	165.015	255.963	1.55896	0.0806621
ENSRNOG00000013928	Dsp	ensembl	106.635	75.2353	0.716168	0.0807108
ENSRNOG00000036243	Mir493	ensembl	0.325929	3.0968	6.68334	0.0807594
ENSRNOG00000015666	Abcc12	ensembl	33.3488	18.4639	0.555046	0.0807764
ENSRNOG00000008489	Ppih	ensembl	3.21979	10.4143	3.23337	0.0808978
ENSRNOG00000002984	Bmp15	ensembl	24.4372	12.9967	0.529198	0.0809321
ENSRNOG00000050404	Pmepa1	ensembl	440.463	303.57	0.70296	0.0809474
ENSRNOG00000012584	Aamdc	ensembl	128.946	172.103	1.35189	0.0809625
ENSRNOG00000047491	AABR07037520.1	ensembl	707.019	863.846	1.23823	0.0810113
ENSRNOG00000003476	Slc6a4	ensembl	110.651	69.843	0.63635	0.081035
ENSRNOG00000020527	Drap1	ensembl	1695.58	1374.19	0.821707	0.081038
ENSRNOG00000061998	RT1-CE9-ps1	havana	14.0246	23.1875	1.64731	0.0811326
ENSRNOG00000058238	Rn50_20_0046.8	havana	7.11919	13.5864	1.94882	0.0811527
ENSRNOG00000015232	Pip5k1b	ensembl_havana	267.494	343.139	1.2961	0.0811539
ENSRNOG00000018295	Ccar2	ensembl	328.154	446.699	1.37841	0.0812463
ENSRNOG00000048371	Fam185a	ensembl	52.2357	75.1513	1.44598	0.081373
ENSRNOG00000000723	RT1-CE5	ensembl_havana	15.1535	24.465	1.62631	0.081385
ENSRNOG00000044615	Mir1949	ensembl	2.43343	0	0.0474382	0.0814719
ENSRNOG00000052260	Vom1r10	ensembl	0	3.72312	31.3254	0.0815699
ENSRNOG00000015076	Cyp26b1	ensembl	412.9	520.377	1.27933	0.0816313
ENSRNOG00000029185	Rasa1	ensembl	2297.96	1824.28	0.805543	0.081718
ENSRNOG00000056558	Gabra3	ensembl	1025.1	1248.35	1.23653	0.0817843
ENSRNOG00000007124	Krcc1	ensembl	931.409	691.313	0.753923	0.0818512
ENSRNOG00000030569	Olr1163	ensembl	0.393178	2.83578	6.00053	0.0818556
ENSRNOG00000056253	U6	ensembl	0.376573	2.83578	6.0125	0.0818766
ENSRNOG00000003872	Slc40a1	ensembl	77.3271	54.1033	0.708948	0.0819116
ENSRNOG00000005933	Yap1	ensembl	333.197	256.817	0.779281	0.0819127
ENSRNOG00000021433	Arhgef39	ensembl	509.437	395.736	0.789368	0.0820007
ENSRNOG00000056786	Piezo1	ensembl	68.8988	92.781	1.36279	0.0820614
ENSRNOG00000051027	Rn50_X_0641.4	havana	0	2.26405	19.188	0.0820803
ENSRNOG00000036958	LOC102556447	ensembl	0	2.26405	19.1881	0.0820945
ENSRNOG00000020107	Stk11ip	ensembl	110.56	147.89	1.34888	0.0821348
ENSRNOG00000061039	Prpf31	ensembl	1161.52	896.978	0.785309	0.0821549
ENSRNOG00000011863	Gins3	ensembl	90.6329	64.3828	0.719426	0.0821728
ENSRNOG00000018364	Kat2a	ensembl	284.395	378.177	1.34582	0.0822029
ENSRNOG00000019737	Sema4a	ensembl	275.176	369.513	1.36234	0.0822124
ENSRNOG00000046036	LOC100912218	ensembl_havana	7.65232	14.3685	1.87916	0.0822341
ENSRNOG00000007081	Xdh	ensembl	379.722	288.762	0.768146	0.0822451
ENSRNOG00000022964	Rnf222	ensembl	0	2.36434	20.4737	0.0822743
ENSRNOG00000041826	AABR07053152.1	ensembl	75.6763	53.6685	0.717664	0.0823074
ENSRNOG00000020450	Slc26a6	ensembl	105.411	144.407	1.38351	0.0823877
ENSRNOG00000006865	Laptm4a	ensembl	12467	8301.72	0.672058	0.0825185
ENSRNOG00000003741	Nptx1	ensembl	1215.73	1513.36	1.26198	0.0825587
ENSRNOG00000046316	Tomm6	ensembl	418.181	583.225	1.40621	0.0825726
ENSRNOG00000016391	LOC100912163	ensembl	1807.82	1432.31	0.804643	0.0827372
ENSRNOG00000000517	Kctd20	ensembl_havana	139.61	193.738	1.40533	0.0827909
ENSRNOG00000025936	Rpl6	ensembl	458.449	354.027	0.785184	0.0827912
ENSRNOG00000010241	Hspb11	ensembl	152.929	94.3451	0.628729	0.0828126
ENSRNOG00000060952	AABR07056183.1	ensembl	21.9468	12.8285	0.590348	0.0828414
ENSRNOG00000058456	AABR07051177.1	ensembl	13.9242	7.21011	0.534291	0.0828649
ENSRNOG00000009459	Slc35f6	ensembl	697.039	855.452	1.24201	0.0829062
ENSRNOG00000029173	Rpl22l2	ensembl	123.923	78.6593	0.650037	0.0829133
ENSRNOG00000013514	Maf1	ensembl	782.571	964.539	1.24677	0.0829232
ENSRNOG00000048836	AABR07003935.7	ensembl	1.45565	4.83737	3.23909	0.0829645
ENSRNOG00000005572	RGD1306782	ensembl	2.51729	6.74852	2.58866	0.0829824
ENSRNOG00000054017	Hist1h4m	ensembl	214.801	286.934	1.34666	0.0831336
ENSRNOG00000032231	Mroh6	ensembl	2.87726	7.7336	2.59312	0.0831643
ENSRNOG00000021452	Hypm	ensembl	1.12972	5.11172	4.28096	0.0831931
ENSRNOG00000056878	AABR07055492.1	ensembl	359.492	266.074	0.750047	0.0832737
ENSRNOG00000004290	Grb10	ensembl	1482.26	1849.08	1.26438	0.0833086
ENSRNOG00000038572	Ncapg	ensembl	104.17	71.7449	0.702858	0.0833233
ENSRNOG00000048676	Pip5kl1	ensembl	127.443	172.104	1.3671	0.0834099
ENSRNOG00000000414	Cep85l	ensembl	638.198	496.429	0.789451	0.0834719
ENSRNOG00000014105	AC103056.1	ensembl	12.4797	6.11031	0.497993	0.0835271
ENSRNOG00000006689	Chd7	ensembl	1203.25	926.346	0.781155	0.0836078
ENSRNOG00000001229	Col18a1	ensembl	250.734	191.257	0.771838	0.0836211
ENSRNOG00000061498	AABR07069100.1	ensembl	17.8339	9.17934	0.525076	0.0837242
ENSRNOG00000019424	Aspdh	ensembl	34.8883	52.7792	1.51411	0.0837249
ENSRNOG00000019623	Zfp446	ensembl	44.948	67.0129	1.4964	0.0837255
ENSRNOG00000019930	Rhot2	ensembl	553.787	692.921	1.26601	0.0838112
ENSRNOG00000023521	Map3k10	ensembl	681.921	882.114	1.3077	0.083819
ENSRNOG00000017843	Polr3k	ensembl	360.118	464.974	1.30516	0.083859
ENSRNOG00000051499	Tcf3	ensembl	177.715	129.288	0.739271	0.0840849
ENSRNOG00000015625	MGC116202	ensembl	365.78	479.308	1.32141	0.0841503
ENSRNOG00000020274	Taf5	ensembl	966.2	763.441	0.801625	0.0841577
ENSRNOG00000041746	AC095678.1	ensembl	1.79818	5.71376	3.0419	0.0841852
ENSRNOG00000051000	LOC685881	ensembl	1.16293	5.02842	4.27319	0.0843679
ENSRNOG00000024793	Kctd21	ensembl	326.968	418.849	1.29422	0.084426
ENSRNOG00000012720	Irx4	ensembl	15.1838	30.2202	2.00334	0.084462
ENSRNOG00000007730	Vom2r53	ensembl	7.37787	14.2801	1.94946	0.0844703
ENSRNOG00000027194	Sgsm2	ensembl_havana	455.569	558.063	1.24116	0.0844936
ENSRNOG00000051166	Rn50_13_0801.2	havana	14.0018	7.45322	0.53644	0.0845255
ENSRNOG00000032765	RGD1559955	ensembl	208.248	158.399	0.770597	0.0847118
ENSRNOG00000017286	Ephx2	ensembl	263.322	199.341	0.768155	0.0847154
ENSRNOG00000001872	Lrrc74b	ensembl	1.55611	5.30881	3.47081	0.084815
ENSRNOG00000046955	Cbx6	ensembl	1710.14	2150.54	1.27192	0.0848333
ENSRNOG00000058711	AABR07034598.1	ensembl	3.15254	7.89197	2.3969	0.0848586
ENSRNOG00000029339	LOC100363268	ensembl	2912.3	2220.27	0.773123	0.0848676
ENSRNOG00000018556	Tomm40	ensembl	156.438	218.205	1.41395	0.084922
ENSRNOG00000023340	Tmem72	ensembl	590.584	375.3	0.640418	0.0849229
ENSRNOG00000054688	AABR07065768.2	ensembl	0.393178	3.66504	7.64132	0.0849539
ENSRNOG00000021023	Mag	ensembl	7813.35	10033.8	1.29926	0.084998
ENSRNOG00000047656	Gaa	ensembl	3563.88	4335.01	1.23256	0.0850569
ENSRNOG00000007512	Srp14	ensembl	237.944	179.981	0.768578	0.0850802
ENSRNOG00000017052	Pianp	ensembl	157.989	236.403	1.51054	0.0851354
ENSRNOG00000014751	Ret	ensembl	1406.12	1750.68	1.26003	0.0851497
ENSRNOG00000025981	Ska2	ensembl	99.6292	62.053	0.638607	0.0853156
ENSRNOG00000009515	Pgm3	ensembl	622.98	492.326	0.800297	0.0853557
ENSRNOG00000002592	Rps6ka6	ensembl	292.448	384.794	1.3322	0.0854001
ENSRNOG00000025261	LOC691254	ensembl	50.0392	30.9633	0.626485	0.0854008
ENSRNOG00000016983	Myh7	ensembl	29.3347	16.8088	0.583167	0.0854595
ENSRNOG00000005370	S1pr4	ensembl	4.60736	11.1376	2.34575	0.0854654
ENSRNOG00000003736	Col5a2	ensembl	449.51	346.905	0.780877	0.0855021
ENSRNOG00000058386	Golt1b	ensembl	2469.38	3048.81	1.25026	0.0855335
ENSRNOG00000019779	Disc1	ensembl	14.6711	23.1742	1.60051	0.0856519
ENSRNOG00000053889	Celsr3	ensembl	347.344	462.244	1.34778	0.0856681
ENSRNOG00000052031	7SK	ensembl	0	2.35339	20.27	0.0857034
ENSRNOG00000022709	Rn50_5_0009.1	havana	311.782	237.242	0.772453	0.0857078
ENSRNOG00000049496	Trim62	ensembl	22.908	34.2415	1.51594	0.0857522
ENSRNOG00000027213	Asphd1	ensembl	83.4762	117.892	1.42754	0.0857671
ENSRNOG00000032703	Rasgrp3	ensembl	3276.28	2590.26	0.802657	0.0857842
ENSRNOG00000056765	Rpl10	ensembl	1280.17	1626.76	1.28543	0.0857911
ENSRNOG00000015383	Asxl3	ensembl	85.5128	113.776	1.35078	0.085863
ENSRNOG00000030965	Olr1164	ensembl	0.393178	3.26009	6.83177	0.085902
ENSRNOG00000018715	Clec10a	ensembl	39.514	24.1289	0.612821	0.0859578
ENSRNOG00000024763	LOC685431	ensembl	1076.23	867.295	0.817625	0.0859599
ENSRNOG00000059378	AABR07068066.3	ensembl	0	2.12013	18.2323	0.086025
ENSRNOG00000012763	Cwf19l1	ensembl	286.563	363.221	1.2822	0.0860998
ENSRNOG00000034128	RGD1560917	ensembl	110.429	77.3159	0.714377	0.0861216
ENSRNOG00000011387	Tet3	ensembl	326.882	445.779	1.3779	0.0861984
ENSRNOG00000055394	U1	ensembl	6.65793	2.27849	0.373361	0.0862645
ENSRNOG00000005890	Serbp1	ensembl	6168.13	4959.92	0.816903	0.0862742
ENSRNOG00000050714	Islr2	ensembl	24.5561	10.8087	0.452194	0.0862941
ENSRNOG00000020054	Pcdhb15	ensembl	76.62	107.437	1.42414	0.0862944
ENSRNOG00000029238	Hgh1	ensembl	223.499	296.989	1.34002	0.086295
ENSRNOG00000006885	Dbx2	ensembl	89.1335	119.558	1.3558	0.0863342
ENSRNOG00000011104	LOC100360057	ensembl	252.062	175.489	0.702997	0.0863415
ENSRNOG00000005184	Nop10	ensembl	1012.69	1341.17	1.33939	0.0865609
ENSRNOG00000007663	LOC100911372	ensembl	3070.25	2366.58	0.782068	0.0865902
ENSRNOG00000007158	Qtrt1	ensembl	47.9006	67.515	1.42892	0.0866031
ENSRNOG00000052338	SNORA2	ensembl	5.1533	1.48192	0.310352	0.0866053
ENSRNOG00000060308	AC115420.4	ensembl	20.1391	31.7211	1.57668	0.0866251
ENSRNOG00000056233	AC120262.1	ensembl	26.7962	40.4232	1.5221	0.0866618
ENSRNOG00000051680	Ccdc186	ensembl	5246.42	4264.43	0.825059	0.0866678
ENSRNOG00000048004	Gareml	ensembl	127.786	173.883	1.37175	0.0867577
ENSRNOG00000005971	Gpr176	ensembl	383.954	484.226	1.27633	0.0867748
ENSRNOG00000050067	LOC100364509	ensembl	231.048	169.183	0.744434	0.0868601
ENSRNOG00000016807	Oat	ensembl	4409.25	3565.66	0.819913	0.0868744
ENSRNOG00000007921	Hnrnpm	ensembl	1851.92	1476.76	0.809386	0.0868949
ENSRNOG00000061528	U2	ensembl	33.4098	18.9885	0.572649	0.0869512
ENSRNOG00000032825	Rpl30	ensembl	1736.18	1347.58	0.789255	0.0869979
ENSRNOG00000015182	Ppp2cb	ensembl	1313.39	1660.28	1.28118	0.087003
ENSRNOG00000015418	Klhl14	ensembl	161.487	211.286	1.33287	0.0870221
ENSRNOG00000049047	Rpl38-ps3	ensembl	202.48	145.108	0.729897	0.0870924
ENSRNOG00000046132	AABR07024439.1	ensembl	10.99	19.449	1.77788	0.087158
ENSRNOG00000011261	Ttc14	ensembl	1518.74	1190.69	0.795169	0.0871625
ENSRNOG00000025864	Lemd2	ensembl	87.7389	60.035	0.697588	0.0871828
ENSRNOG00000058727	AABR07012081.2	ensembl	115.035	82.7631	0.732233	0.0871831
ENSRNOG00000013967	Blnk	ensembl	58.7283	80.0036	1.37771	0.0872414
ENSRNOG00000031889	Rpl6-ps1	ensembl	4063.33	3043.08	0.763112	0.0872684
ENSRNOG00000019212	Tpp1	ensembl	827.629	1030.22	1.26037	0.087353
ENSRNOG00000024414	Ate1	ensembl	2903.74	2333.06	0.815527	0.087356
ENSRNOG00000006992	Rpl7	ensembl	5497.12	4317.18	0.796361	0.0873775
ENSRNOG00000028592	RGD1562451	ensembl	124.968	91.1082	0.742176	0.0873949
ENSRNOG00000009857	Ftsj3	ensembl	915.879	720.165	0.798769	0.0874077
ENSRNOG00000028628	LOC100911196	ensembl	110.116	160.381	1.46427	0.08742
ENSRNOG00000050490	Mir3064	ensembl	60.841	94.9652	1.56591	0.0874495
ENSRNOG00000061406	AABR07007799.1	ensembl	9.2599	16.4693	1.79971	0.0874655
ENSRNOG00000005451	Dnah11	ensembl	560.668	430.433	0.778264	0.087479
ENSRNOG00000005639	Ar	ensembl_havana	201.635	262.617	1.31975	0.0875701
ENSRNOG00000018615	Cenph	ensembl	1.89864	5.98082	3.2122	0.0875829
ENSRNOG00000014925	Mesp2	ensembl	11.671	22.7752	1.9227	0.0876398
ENSRNOG00000001419	Cldn15	ensembl	24.0946	36.1972	1.5061	0.0876411
ENSRNOG00000003461	Zfp330	ensembl	1664.94	1292.28	0.787876	0.0876538
ENSRNOG00000060577	U5	ensembl	1.83222	5.96638	3.16884	0.0877229
ENSRNOG00000009790	Kcnk3	ensembl	259.76	333.108	1.30023	0.0877242
ENSRNOG00000048243	Hs6st3	ensembl	212.136	157.191	0.752706	0.0877811
ENSRNOG00000017412	AABR07001512.1	ensembl	498.842	350.173	0.715666	0.0878556
ENSRNOG00000033686	Rpl38-ps2	ensembl	75.8005	50.4085	0.679265	0.0878622
ENSRNOG00000048176	AABR07024593.2	ensembl	155.432	113.866	0.744644	0.0878697
ENSRNOG00000024635	Cramp1	ensembl	283.136	378.223	1.35089	0.0878861
ENSRNOG00000051129	Rn50_X_0677.1	havana	581.672	441.967	0.771854	0.0879325
ENSRNOG00000003031	Atp2b4	ensembl	2700.45	3223.4	1.21144	0.0880671
ENSRNOG00000022101	LOC100911902	ensembl	121.253	76.7258	0.639961	0.0882901
ENSRNOG00000024194	Rsf1	ensembl	2127.76	1717.31	0.819037	0.0882915
ENSRNOG00000059944	AABR07006685.1	ensembl	5.46096	1.75389	0.346432	0.088296
ENSRNOG00000050615	AABR07043012.1	ensembl	0.376573	2.76437	6.13381	0.0883833
ENSRNOG00000018092	Cd83	ensembl	1163.82	1405.01	1.22368	0.0884105
ENSRNOG00000058317	Pnck	ensembl	187.504	241.949	1.30514	0.0884762
ENSRNOG00000049200	Vom2r50	ensembl	0.393178	4.38069	9.14271	0.088524
ENSRNOG00000052314	SNORA9	ensembl	2.38279	0	0.0480869	0.0885569
ENSRNOG00000004269	Myt1l	ensembl	1982.93	1582.69	0.810612	0.0885861
ENSRNOG00000038951	Cox17	ensembl	1518.47	1189.76	0.796073	0.0886415
ENSRNOG00000046298	Rn50_9_0428.1	ensembl_havana	1.37096	4.39862	2.96438	0.0886517
ENSRNOG00000008664	Rn50_15_0083.1	havana	3657.98	2866.87	0.796839	0.0887119
ENSRNOG00000018191	Oprm1	ensembl_havana	212.825	286.75	1.37499	0.0887129
ENSRNOG00000052998	AABR07048791.1	ensembl	23.3309	50.3393	2.13355	0.0887145
ENSRNOG00000002947	Dpt	ensembl_havana	29.6379	15.4117	0.51916	0.0887234
ENSRNOG00000018023	Bin3	ensembl	284.955	202.03	0.718469	0.0887501
ENSRNOG00000055653	AC123495.2	ensembl	2.99515	0.252619	0.135182	0.0888397
ENSRNOG00000025923	LOC103693776	ensembl	394.29	559.511	1.43226	0.0888432
ENSRNOG00000011751	Ncdn	ensembl	7677.36	9863.9	1.30013	0.0888437
ENSRNOG00000060347	U1	ensembl	8.77575	2.93606	0.358788	0.0889099
ENSRNOG00000058944	SNORA71	ensembl	4.34951	9.24932	2.11811	0.088924
ENSRNOG00000058308	Asic2	ensembl	251.13	322.37	1.29946	0.0890269
ENSRNOG00000016311	Slc6a2	ensembl	225.301	150.417	0.67672	0.089085
ENSRNOG00000018145	Crat	ensembl	1207.91	1493.08	1.25224	0.0891068
ENSRNOG00000028717	Ndufb7	ensembl	1966.39	1562.45	0.805763	0.08911
ENSRNOG00000053242	U2	ensembl	0.786355	3.90179	4.7058	0.0891529
ENSRNOG00000001484	Gatsl2	ensembl	138.098	214.612	1.5717	0.0891908
ENSRNOG00000009830	Fam204a	ensembl	582.668	436.991	0.762889	0.0892338
ENSRNOG00000012091	Ppa2	ensembl_havana	675.321	513.713	0.774361	0.0892723
ENSRNOG00000004814	Tceb2	ensembl	235.663	337.84	1.44277	0.0895227
ENSRNOG00000051104	Rn50_X_0675.1	havana	88.2383	60.8153	0.700011	0.0895651
ENSRNOG00000057212	AABR07043271.1	ensembl	1.17953	5.28104	4.472	0.0895861
ENSRNOG00000002196	Ociad2	ensembl	204.84	138.629	0.686623	0.089625
ENSRNOG00000004067	Nrcam	ensembl	14711.7	11868.3	0.817443	0.0897032
ENSRNOG00000003707	Zmym3	ensembl_havana	988.242	1205.42	1.23725	0.0898536
ENSRNOG00000053827	AABR07037058.1	ensembl	20.2121	10.2454	0.51979	0.0898586
ENSRNOG00000043189	Trub2	ensembl	481.399	587.918	1.23725	0.0899174
ENSRNOG00000014503	Celf4	ensembl	672.379	895.277	1.34726	0.0900433
ENSRNOG00000007006	Slc3a1	ensembl	3144.63	3797.38	1.22262	0.0900455
ENSRNOG00000047077	LOC681341	ensembl	0	2.31118	19.4622	0.0900727
ENSRNOG00000005810	Nlrc4	ensembl	27.7116	40.5909	1.49586	0.0901173
ENSRNOG00000031816	Nckipsd	ensembl	1200.84	1509.99	1.2714	0.0901467
ENSRNOG00000054391	Snurf	ensembl	146.82	105.668	0.731087	0.0902066
ENSRNOG00000036683	Sirt7	ensembl	111.812	148.655	1.3429	0.0902165
ENSRNOG00000022419	Dok7	ensembl	29.1799	46.6239	1.59946	0.0902555
ENSRNOG00000004092	AABR07029847.1	ensembl	57.4582	34.3721	0.608658	0.0902951
ENSRNOG00000037204	Lyrm9	ensembl	311.263	385.869	1.2561	0.0903003
ENSRNOG00000004784	Ndufaf5	ensembl	1265.7	993.367	0.796668	0.0903341
ENSRNOG00000053741	AABR07052664.1	ensembl	49.3088	29.2715	0.602352	0.0903401
ENSRNOG00000014777	Prpf4	ensembl	424.869	332.417	0.792399	0.0904656
ENSRNOG00000015376	Npas1	ensembl	92.2476	138.92	1.5217	0.0905417
ENSRNOG00000018712	Camk2a	ensembl	94.0976	131.926	1.41401	0.0905514
ENSRNOG00000003773	Hmox2	ensembl	2666.93	2147.72	0.817671	0.0905644
ENSRNOG00000055795	AABR07035832.1	ensembl	55.4198	77.3357	1.40681	0.0906967
ENSRNOG00000053301	LOC685767	ensembl	0.393178	3.10776	6.59798	0.0907198
ENSRNOG00000011535	Gcsh	ensembl	1116.81	878.761	0.7988	0.0907527
ENSRNOG00000011616	Slc26a5	ensembl	0.325929	3.46558	7.56766	0.0907725
ENSRNOG00000054352	Atp6ap1	ensembl	6572.78	8175	1.25721	0.0908121
ENSRNOG00000046308	LOC100359876	ensembl	97.9963	69.7057	0.724005	0.0909305
ENSRNOG00000026211	Mri1	ensembl	209.546	268.436	1.29718	0.0909457
ENSRNOG00000016617	Wwtr1	ensembl	100.797	132.488	1.33379	0.0910743
ENSRNOG00000010608	Cep162	ensembl	297.287	228.474	0.780735	0.0911827
ENSRNOG00000025509	Apbb2	ensembl	386.289	297.835	0.783037	0.0911903
ENSRNOG00000011427	Hr	ensembl	337.501	444.054	1.32909	0.0912171
ENSRNOG00000056305	SNORA40	ensembl	7.90638	2.2869	0.313087	0.0912669
ENSRNOG00000036672	Sectm1a	ensembl	3.61297	8.47702	2.27863	0.0913326
ENSRNOG00000043258	Bpifa6	ensembl	0	2.68837	22.6508	0.0915239
ENSRNOG00000060888	LOC100912027	ensembl	25.37	15.5348	0.625455	0.0915288
ENSRNOG00000006199	Ispd	ensembl	274.339	341.802	1.26091	0.091543
ENSRNOG00000032647	LOC100363333	ensembl	0	2.68837	22.6509	0.0915571
ENSRNOG00000012566	Kcnv2	ensembl	6.55747	2.66408	0.425845	0.0915632
ENSRNOG00000059405	AC125384.1	ensembl	9.50743	17.2355	1.78353	0.0916201
ENSRNOG00000054539	Hist1h2ail1	ensembl	24.8255	40.8035	1.64511	0.0916292
ENSRNOG00000061213	Mrps36	ensembl	810.082	986.386	1.23255	0.0916459
ENSRNOG00000021609	RGD1563072	ensembl	764.692	600.762	0.797634	0.0918402
ENSRNOG00000012651	Cwc22	ensembl	462.457	358.537	0.787231	0.0918783
ENSRNOG00000016133	Sumo1	ensembl	2579.29	1992.11	0.783825	0.0919379
ENSRNOG00000051686	AABR07052502.1	ensembl	3.27043	7.53414	2.27522	0.0919719
ENSRNOG00000019236	Rnf220	ensembl	1394.4	1687.76	1.22626	0.092
ENSRNOG00000058581	AABR07006436.1	ensembl	3.5386	0	0.0347956	0.0920704
ENSRNOG00000030111	Cyp11b2	ensembl_havana	69.2547	43.067	0.628662	0.092076
ENSRNOG00000011276	Tmem254	ensembl_havana	326.859	438.714	1.35348	0.0920792
ENSRNOG00000005695	Mgp	ensembl	259.649	164.545	0.638655	0.0920869
ENSRNOG00000018905	Armc4	ensembl	18.2903	10.5561	0.580667	0.0921554
ENSRNOG00000010835	Dmbx1	ensembl	77.6887	117.916	1.55151	0.0922394
ENSRNOG00000005038	Ube2t	ensembl	1.17953	4.76485	4.02568	0.0922708
ENSRNOG00000017851	Etfb	ensembl	953.835	697.963	0.745948	0.0922713
ENSRNOG00000018110	Svil	ensembl	552.667	420.691	0.77046	0.0923286
ENSRNOG00000059489	AC111319.3	ensembl	23.953	35.7804	1.50518	0.0924127
ENSRNOG00000022283	Lhfpl5	ensembl_havana	342.234	428.259	1.26608	0.0924873
ENSRNOG00000058658	Mtch2	ensembl	1709.82	1362.77	0.807915	0.0925032
ENSRNOG00000051891	Hist1h4a	ensembl	335.804	446.261	1.34182	0.0925142
ENSRNOG00000020771	Sap18	ensembl	1444.03	1153.08	0.811465	0.0925717
ENSRNOG00000020058	Celsr2	ensembl	1320.88	1795.22	1.37501	0.092627
ENSRNOG00000004520	Wdr60	ensembl	902.132	691.145	0.778975	0.092727
ENSRNOG00000032130	LOC691427	ensembl	302.725	212.52	0.710524	0.0927535
ENSRNOG00000001001	Retn	ensembl	0.325929	2.66408	5.87824	0.0927812
ENSRNOG00000001300	P2rx4	ensembl	701.482	545.404	0.789471	0.0927826
ENSRNOG00000042598	LOC100909977	ensembl	1.79818	5.54699	2.92208	0.0927865
ENSRNOG00000037081	LOC499886	ensembl	0.325929	2.90227	6.23394	0.0928386
ENSRNOG00000007332	Sstr3	ensembl	157.391	204.173	1.31164	0.0928596
ENSRNOG00000053078	U11	ensembl	50.9014	32.7232	0.65611	0.0929215
ENSRNOG00000019826	Sil1	ensembl	598.945	751.335	1.26844	0.092927
ENSRNOG00000025594	Scrt1	ensembl	127.161	183.778	1.46594	0.0929657
ENSRNOG00000005374	Lyar	ensembl	340.506	263.663	0.786035	0.0930363
ENSRNOG00000058276	AABR07043200.1	ensembl	12.5137	6.38577	0.533823	0.0930427
ENSRNOG00000060837	AC132752.2	ensembl	40.1304	58.2436	1.47695	0.0931563
ENSRNOG00000037220	Rpl5l1	ensembl	1675.67	1245.56	0.755969	0.0931713
ENSRNOG00000042886	Rps28	ensembl	62.2252	40.1244	0.659868	0.093177
ENSRNOG00000042404	Ccdc122	ensembl	131.967	97.037	0.742682	0.093178
ENSRNOG00000056629	AABR07024500.1	ensembl	54.864	33.8338	0.626193	0.0932669
ENSRNOG00000049063	Slc16a9	ensembl	74.295	52.7511	0.720018	0.0933526
ENSRNOG00000011827	AABR07009397.1	ensembl	699.557	879.773	1.27224	0.0933553
ENSRNOG00000059834	Cib2	ensembl	281.555	357.406	1.28511	0.0933725
ENSRNOG00000019491	Stard10	ensembl	638.002	792.68	1.25787	0.09338
ENSRNOG00000058152	SNORA20	ensembl	10.2717	4.90386	0.502898	0.0934073
ENSRNOG00000045740	Tmx3	ensembl	1242.28	952.078	0.777804	0.0934102
ENSRNOG00000018266	Slc23a3	ensembl	5.39454	10.4702	1.92958	0.0934518
ENSRNOG00000011237	Zc3h13	ensembl	2036.71	1619.83	0.807779	0.0934968
ENSRNOG00000046379	LOC100912604	ensembl	105.364	141.929	1.36262	0.0936122
ENSRNOG00000017466	Kif5b	ensembl	16108.2	12747.8	0.803239	0.0937381
ENSRNOG00000012007	Slc38a7	ensembl	130.57	175	1.35808	0.0937384
ENSRNOG00000030463	Faim	ensembl	275.77	206.961	0.760992	0.0938012
ENSRNOG00000061490	AABR07056605.1	ensembl	5.74656	1.50128	0.286935	0.0939755
ENSRNOG00000027719	AABR07068154.1	ensembl	1012.93	768.826	0.770571	0.0940822
ENSRNOG00000052319	AABR07004881.1	ensembl	235.872	327.54	1.39861	0.0941513
ENSRNOG00000013102	Entpd2	ensembl	183.917	261.74	1.43338	0.094171
ENSRNOG00000025832	Zer1	ensembl	1449.98	1792.98	1.25264	0.0942729
ENSRNOG00000053091	Rn50_20_0013.2	havana	0.325929	3.2685	7.01898	0.0943384
ENSRNOG00000013933	Med27	ensembl	314.668	429.423	1.37835	0.0943632
ENSRNOG00000023965	AABR07013464.1	ensembl	23.381	13.6346	0.594008	0.094434
ENSRNOG00000027228	Mogat2	ensembl	20.7689	32.3605	1.57795	0.094437
ENSRNOG00000043436	Micu1	ensembl	2271.72	2764.31	1.23148	0.0945148
ENSRNOG00000015583	Dnal4	ensembl	159.415	208.475	1.31959	0.094542
ENSRNOG00000060547	U6	ensembl	6.00607	2.17821	0.378186	0.0946972
ENSRNOG00000021005	Mrpl16	ensembl	585.081	456.147	0.792435	0.0948207
ENSRNOG00000018863	Abcc10	ensembl	102.405	139.016	1.37197	0.0949502
ENSRNOG00000008346	Itgb6	ensembl	15.4843	5.35737	0.350603	0.09499
ENSRNOG00000049802	AABR07031533.1	ensembl	139.565	192.73	1.39981	0.0951726
ENSRNOG00000051085	Rn50_2_1764.2	havana	79.2695	107.584	1.38216	0.0952269
ENSRNOG00000022136	LOC685680	ensembl	9.92753	4.36482	0.445281	0.0952529
ENSRNOG00000035640	Mir30e	ensembl	1.73093	5.45274	2.93966	0.0953556
ENSRNOG00000029866	Dennd6b	ensembl	149.955	196.027	1.32076	0.0953598
ENSRNOG00000026962	Osbpl8	ensembl	2223.62	1798.17	0.820606	0.0953721
ENSRNOG00000043100	Rn50_18_0532.1	havana	454.626	338.645	0.756779	0.0954613
ENSRNOG00000011310	Pde10a	ensembl	334.025	415.757	1.26362	0.0954908
ENSRNOG00000003967	Vmp1	ensembl	3964.39	3239.24	0.828453	0.0955
ENSRNOG00000053253	7SK	ensembl	3.81471	0.571725	0.187861	0.095508
ENSRNOG00000006824	Hdac11	ensembl	3217.46	3806.87	1.19937	0.0955271
ENSRNOG00000014434	Chd1	ensembl	1597.18	1291.84	0.820426	0.0955867
ENSRNOG00000025060	Nanos1	ensembl	12.581	21.9715	1.76046	0.0957153
ENSRNOG00000027773	Ppp4r3a	ensembl	991.661	795.682	0.813925	0.0957842
ENSRNOG00000050746	Rn50_16_0006.1	havana	73.1227	50.4483	0.705279	0.0958281
ENSRNOG00000004091	Cwc25	ensembl	652.076	518.543	0.807249	0.0958637
ENSRNOG00000003365	Cadm3	ensembl	4860.18	5863.68	1.2211	0.0958712
ENSRNOG00000005323	Syne2	ensembl_havana	1295.97	1026.81	0.802182	0.0959241
ENSRNOG00000017965	Afg3l2	ensembl	2421.58	1976.86	0.82763	0.0960104
ENSRNOG00000046740	LOC688672	ensembl	1650.24	1305.84	0.801865	0.0960412
ENSRNOG00000029966	Xrcc4	ensembl	375.191	289.122	0.779882	0.096053
ENSRNOG00000027309	Cntnap3	ensembl	15.8664	27.3517	1.74119	0.0960678
ENSRNOG00000009586	Olr455	ensembl	0	3.38466	28.5404	0.0960692
ENSRNOG00000037025	Smgc	ensembl	0.376573	5.07699	10.6456	0.0961023
ENSRNOG00000056308	7SK	ensembl	26.2291	16.5924	0.646154	0.0961111
ENSRNOG00000000340	RGD1304704	ensembl	2994.78	2399.46	0.81388	0.0961131
ENSRNOG00000017625	Htr2b	ensembl	34.2683	21.9582	0.649842	0.0961695
ENSRNOG00000026963	Hsp90b1	ensembl	25786.4	20643.5	0.812821	0.0962208
ENSRNOG00000016221	Scn2b	ensembl	1514.17	1806.49	1.20971	0.0962464
ENSRNOG00000001506	Tmem35	ensembl	1567.97	1913.61	1.23437	0.0962565
ENSRNOG00000010286	Cast	ensembl	3981.12	3251.13	0.826411	0.0962656
ENSRNOG00000003532	Magea11	ensembl	4.19129	10.2393	2.47632	0.0963774
ENSRNOG00000010607	Rnf208	ensembl	251.119	346.071	1.39487	0.0964976
ENSRNOG00000019975	Cdc5l	ensembl	3264.51	2588.67	0.805226	0.0965421
ENSRNOG00000010038	Psmc5	ensembl	6902.78	5586.68	0.82053	0.096577
ENSRNOG00000052382	U6	ensembl	2.60197	7.20408	2.75004	0.0965924
ENSRNOG00000037628	AABR07045487.1	ensembl	3.21979	0.591085	0.21578	0.0966434
ENSRNOG00000000138	Glis1	ensembl	18.6827	30.3264	1.64157	0.0966618
ENSRNOG00000027871	Rapgefl1	ensembl	413.475	559.16	1.36552	0.0966779
ENSRNOG00000056374	Zfp933	ensembl	422.565	329.195	0.789285	0.0967058
ENSRNOG00000006440	Ift27	ensembl	188.446	141.636	0.764522	0.0967535
ENSRNOG00000019245	Sgf29	ensembl	119.695	160.333	1.35033	0.0968051
ENSRNOG00000054456	7SK	ensembl	117.131	55.9042	0.49258	0.0968269
ENSRNOG00000051691	Gjd3	ensembl	1.30371	5.33309	3.57622	0.0968358
ENSRNOG00000025701	Nifk	ensembl	1325.76	1059.95	0.811236	0.0968593
ENSRNOG00000025843	Ccdc102a	ensembl	47.607	66.4931	1.41897	0.0969491
ENSRNOG00000055082	Maz	ensembl	179.646	247.225	1.3911	0.0969901
ENSRNOG00000061601	AABR07063575.1	ensembl	2.51729	0.338466	0.163121	0.0970135
ENSRNOG00000025353	Ears2	ensembl	27.8255	41.351	1.51245	0.0970819
ENSRNOG00000031168	Arhgap15	ensembl	44.4965	29.0004	0.655317	0.0970954
ENSRNOG00000060241	LOC497796	ensembl	0.325929	2.74993	5.98532	0.0973681
ENSRNOG00000027742	Adamtsl2	ensembl	66.6315	90.2874	1.36915	0.0973765
ENSRNOG00000058531	SNORD115	ensembl	150.266	194.917	1.31771	0.0975051
ENSRNOG00000012175	Nfatc2	ensembl	87.1778	128.071	1.47547	0.0975453
ENSRNOG00000018554	AABR07026797.1	ensembl	768.166	584.113	0.772286	0.0975958
ENSRNOG00000019744	Prr16	ensembl	126.661	165.012	1.32603	0.0977278
ENSRNOG00000013746	Senp3	ensembl	335.113	432.606	1.30342	0.0977397
ENSRNOG00000019528	Plekhg6	ensembl	9.40069	16.7993	1.78087	0.0978415
ENSRNOG00000004003	Dusp10	ensembl	231.702	289.837	1.27093	0.0979433
ENSRNOG00000018586	Fam134a	ensembl	1931.74	2334.39	1.22406	0.0979894
ENSRNOG00000038905	AABR07048397.1	ensembl	284.627	219.238	0.782707	0.0979962
ENSRNOG00000023278	Sec61a2	ensembl_havana	456.44	566.257	1.25509	0.0980418
ENSRNOG00000047280	Cttn	ensembl	837.788	665.836	0.80633	0.0981213
ENSRNOG00000054039	AABR07010085.1	ensembl	8.44579	3.35545	0.419749	0.0981376
ENSRNOG00000030747	LOC685963	ensembl	337.461	251.801	0.758777	0.0982825
ENSRNOG00000051777	Terc	ensembl	49.7476	79.4241	1.59833	0.0984494
ENSRNOG00000018904	Dtymk	ensembl	562.029	393.405	0.713807	0.0984507
ENSRNOG00000040007	LOC102546495	ensembl	0.393178	3.6844	7.69246	0.0986259
ENSRNOG00000013061	Tusc3	ensembl	882.711	1106.99	1.27199	0.0986799
ENSRNOG00000052353	U6	ensembl	0.376573	2.57824	5.69147	0.0986837
ENSRNOG00000004967	Snrpb2	ensembl	919.346	717.595	0.7934	0.0988194
ENSRNOG00000061719	AABR07001623.1	ensembl	0	2.33054	19.6534	0.0989548
ENSRNOG00000020675	Ccdc97	ensembl	572.809	692.156	1.2265	0.0989591
ENSRNOG00000052209	AABR07053134.1	ensembl	0	2.33054	19.6535	0.0989822
ENSRNOG00000009125	Dis3	ensembl	569.97	448.277	0.798048	0.0990274
ENSRNOG00000023262	Cenpm	ensembl	11.9409	20.2392	1.68746	0.0990552
ENSRNOG00000050289	Cstf2t	ensembl	825.73	660.815	0.810205	0.0990803
ENSRNOG00000019660	Spib	ensembl	12.7209	6.71821	0.533068	0.0991419
ENSRNOG00000006595	Htr3a	ensembl	78.2852	107.309	1.39107	0.0991975
ENSRNOG00000014172	Npy5r	ensembl	82.3739	111.81	1.37897	0.0992042
ENSRNOG00000000320	Timm10b	ensembl	12.5469	20.2719	1.6489	0.0992443
ENSRNOG00000016596	Hspa4	ensembl	11997.5	9757.24	0.824525	0.0993422
ENSRNOG00000058526	AABR07033234.1	ensembl	28.2771	16.7557	0.606155	0.0993438
ENSRNOG00000016878	Lppr5	ensembl	308.049	379.938	1.2495	0.0994167
ENSRNOG00000061346	B3glct	ensembl	104.608	71.3192	0.6951	0.099418
ENSRNOG00000051554	AABR07036302.1	ensembl	2.58454	0.338466	0.161582	0.099462
ENSRNOG00000026953	Gpr88	ensembl	726.878	489.723	0.681805	0.0994621
ENSRNOG00000004678	Itln1	ensembl	0.719106	3.51271	4.26254	0.0994666
ENSRNOG00000016686	Tmem167a	ensembl	221.243	287.166	1.31149	0.0995432
ENSRNOG00000015005	LOC100912524	ensembl	6.05838	1.09632	0.208055	0.0996687
ENSRNOG00000026589	Dpy19l1	ensembl	6306.22	5091.12	0.818983	0.0996728
ENSRNOG00000031290	Trappc3l	ensembl	64.3705	91.6568	1.45115	0.0997341
ENSRNOG00000044644	AABR07049760.1	ensembl	0.702502	3.34102	4.11792	0.0997531
ENSRNOG00000031398	Mab21l2	ensembl_havana	937.925	1139.51	1.23384	0.0997865
ENSRNOG00000010378	Slc4a5	ensembl	75.3821	52.1609	0.706821	0.0998444
ENSRNOG00000055466	Derl2	ensembl	390.354	483.268	1.25382	0.0999584
ENSRNOG00000061779	Man2b2	ensembl_havana	46.7979	67.9101	1.46573	0.0999976
ENSRNOG00000008239	Repin1	ensembl	404.238	499.302	1.24991	0.100035
ENSRNOG00000028844	Slc9a5	ensembl	206.774	270.628	1.3289	0.100095
ENSRNOG00000001429	Lrwd1	ensembl	70.7791	96.9675	1.385	0.100134
ENSRNOG00000058039	Acta2	ensembl	162.399	123.101	0.767678	0.100142
ENSRNOG00000026952	Rgsl1	ensembl	2.66839	9.958	3.74539	0.100219
ENSRNOG00000000798	Gnl1	ensembl_havana	707.167	875.867	1.2583	0.100249
ENSRNOG00000046944	AC110709.1	ensembl	871.937	686.481	0.800006	0.100279
ENSRNOG00000057622	Rbm41	ensembl	450.048	350.985	0.791321	0.100283
ENSRNOG00000047557	LOC103690996	ensembl	128.987	94.2085	0.744149	0.100301
ENSRNOG00000017977	Smpd1	ensembl	1437.65	1759.21	1.23795	0.100335
ENSRNOG00000017050	Lmntd2	ensembl	2.91047	7.57778	2.52943	0.100403
ENSRNOG00000042369	RGD1564614	ensembl	9.28196	2.96034	0.319858	0.100409
ENSRNOG00000015353	Prss12	ensembl	96.221	131.529	1.38195	0.100421
ENSRNOG00000005869	AABR07017110.1	ensembl	1506.13	1198.97	0.807279	0.100423
ENSRNOG00000010302	Rasl10b	ensembl_havana	65.4074	101.671	1.56577	0.100571
ENSRNOG00000016486	Nop58	ensembl	1643.01	1322.14	0.817248	0.100598
ENSRNOG00000009309	Meaf6	ensembl	968.079	1162.99	1.21663	0.100631
ENSRNOG00000021242	Adam33	ensembl	2.89386	6.87657	2.34129	0.100675
ENSRNOG00000005114	Tmem74	ensembl	65.4647	89.2028	1.38421	0.100771
ENSRNOG00000054775	Fkbp11	ensembl	1651.38	2050.94	1.25645	0.100776
ENSRNOG00000004084	Fam84a	ensembl	628.319	755.752	1.22092	0.100849
ENSRNOG00000023633	Crabp1	ensembl	191.242	249.34	1.3225	0.100883
ENSRNOG00000037707	Armcx6	ensembl	324.402	399.211	1.24806	0.100942
ENSRNOG00000008364	Cat	ensembl	1395.74	1119.54	0.814105	0.100994
ENSRNOG00000025980	LOC691418	ensembl	7.70297	3.21645	0.441237	0.101009
ENSRNOG00000004137	Ubtd2	ensembl	189.205	243.391	1.29928	0.101145
ENSRNOG00000017568	Rit2	ensembl	2046.44	2435.79	1.20533	0.101176
ENSRNOG00000050407	Hiat1	ensembl	743.529	904.249	1.23127	0.101207
ENSRNOG00000028092	Cpa2	ensembl	22.5314	37.3145	1.67602	0.10123
ENSRNOG00000059442	Pde12	ensembl	495.941	606.32	1.23968	0.10137
ENSRNOG00000021472	Ermn	ensembl	14165.3	11154.2	0.799962	0.101419
ENSRNOG00000033199	AABR07068955.1	ensembl	15.9233	24.9763	1.59277	0.101421
ENSRNOG00000018390	Pld3	ensembl	1977.88	2471.21	1.26287	0.101437
ENSRNOG00000012810	Rfesd	ensembl	325.984	403.374	1.25293	0.101463
ENSRNOG00000059244	LOC100909849	ensembl	21.4927	32.2373	1.50093	0.101566
ENSRNOG00000019134	Htr4	ensembl	82.5975	107.937	1.32497	0.101632
ENSRNOG00000045762	AABR07018048.1	ensembl	0.651857	3.32166	4.14998	0.101725
ENSRNOG00000000010	Cbln1	ensembl	353.966	472.266	1.34857	0.101785
ENSRNOG00000047574	Nrxn3	ensembl_havana	2579.11	3145	1.23436	0.101787
ENSRNOG00000046834	C3	ensembl	625.868	484.045	0.78704	0.101855
ENSRNOG00000003883	LOC317456	ensembl	197.5	258.285	1.32795	0.101857
ENSRNOG00000050393	LOC103692831	ensembl	120.49	87.1034	0.735394	0.101876
ENSRNOG00000009576	Xpa	ensembl	150.754	109.171	0.732647	0.101908
ENSRNOG00000053605	AABR07062670.1	ensembl	0	2.62188	22.2571	0.101991
ENSRNOG00000047514	Olr1539	ensembl	0	2.62188	22.2572	0.102025
ENSRNOG00000031440	Nova1	ensembl	1781.37	2117.62	1.20605	0.10203
ENSRNOG00000010846	Ccdc22	ensembl	201.638	153.692	0.770564	0.102055
ENSRNOG00000029082	RGD1566189	ensembl	9.55808	16.9334	1.76334	0.102097
ENSRNOG00000038174	AABR07057322.1	ensembl	5.16907	1.35386	0.265705	0.102115
ENSRNOG00000031453	Manbal	ensembl	483.75	613.574	1.28075	0.102117
ENSRNOG00000016763	Fgfr4	ensembl	3.47847	0.638212	0.201214	0.102363
ENSRNOG00000030537	Slc26a11	ensembl	110.68	156.587	1.42359	0.102399
ENSRNOG00000004695	Celf5	ensembl	129.222	172.682	1.35045	0.10243
ENSRNOG00000013285	Imp4	ensembl_havana	312.566	395.294	1.27669	0.102455
ENSRNOG00000058792	SNORA26	ensembl	0.393178	2.47795	5.29209	0.102487
ENSRNOG00000031032	Hmgn3	ensembl	739.201	592.812	0.813389	0.102554
ENSRNOG00000024848	Fga	ensembl	0.786355	3.8983	4.62462	0.102629
ENSRNOG00000020194	Hes6	ensembl	276.793	361.546	1.32042	0.102653
ENSRNOG00000018616	Cdc42ep5	ensembl	30.4667	50.9886	1.66616	0.102707
ENSRNOG00000053529	AABR07025757.1	ensembl	75.0676	109.237	1.46149	0.10276
ENSRNOG00000060144	Ankle2	ensembl	928.254	754.831	0.824389	0.10282
ENSRNOG00000004135	RGD1311745	ensembl	265.283	195.987	0.751971	0.102886
ENSRNOG00000020551	Bles03	ensembl	126.939	185.624	1.47376	0.102921
ENSRNOG00000030719	Csmd1	ensembl	334.694	412.684	1.25194	0.102971
ENSRNOG00000030346	LOC680959	havana	4.54011	1.2293	0.282523	0.103039
ENSRNOG00000009447	Fam221a	ensembl	44.7037	29.9722	0.674904	0.103051
ENSRNOG00000038102	Elmod3	ensembl	154.598	201.121	1.31248	0.103123
ENSRNOG00000002642	Ptges3	ensembl	3543.82	2870.15	0.822045	0.103132
ENSRNOG00000058746	SNORD113	ensembl	160.157	111.566	0.708394	0.103218
ENSRNOG00000028236	RGD1309104	ensembl	1282.73	1020.33	0.807276	0.103238
ENSRNOG00000057545	AC114363.1	ensembl	0.393178	2.85514	6.04465	0.103383
ENSRNOG00000029050	AABR07047221.1	ensembl	1.55611	5.08396	3.29493	0.103494
ENSRNOG00000025155	Lmtk2	ensembl_havana	3135.42	3795.58	1.22597	0.103527
ENSRNOG00000020412	Sf3b2	ensembl	4620.67	3754.63	0.824994	0.103531
ENSRNOG00000005826	AABR07065923.1	ensembl	576.933	444.201	0.784107	0.103642
ENSRNOG00000008937	Csrp1	ensembl	8743.19	10450.7	1.20962	0.103689
ENSRNOG00000003223	Degs1	ensembl	1065.66	1350.54	1.28067	0.103761
ENSRNOG00000042747	Fam72a	ensembl	40.1459	24.9618	0.628542	0.103834
ENSRNOG00000049532	AC142126.2	ensembl	2.29182	6.98526	3.10545	0.103889
ENSRNOG00000021892	Ccdc38	ensembl	20.969	31.3271	1.51818	0.103912
ENSRNOG00000031579	LOC100363469	ensembl	4200.71	3290.3	0.793943	0.104056
ENSRNOG00000057464	Fmr1	ensembl	1673.97	1357.75	0.821591	0.104107
ENSRNOG00000020185	Wdr6	ensembl	1595.96	1918.27	1.21728	0.104211
ENSRNOG00000007532	RGD1305178	ensembl_havana	1843.37	1472.78	0.81215	0.104225
ENSRNOG00000020833	Cspg5	ensembl	2783.44	3346.37	1.21705	0.104335
ENSRNOG00000018268	Hhip	ensembl	817.504	656.989	0.815372	0.104351
ENSRNOG00000048456	LOC100360117	ensembl	166.13	122.722	0.753009	0.104394
ENSRNOG00000005278	Trhde	ensembl	432.307	532.785	1.24985	0.104413
ENSRNOG00000015818	Tprkb	ensembl	115.505	83.9075	0.738344	0.10446
ENSRNOG00000046214	Cyp27b1	ensembl	2.60114	7.25868	2.74867	0.104467
ENSRNOG00000005082	Irf6	ensembl	323.828	249.999	0.779734	0.104547
ENSRNOG00000014525	Hspd1	ensembl	5412.33	4239.41	0.794442	0.104587
ENSRNOG00000010981	Gtf3c5	ensembl	407.705	509.593	1.26474	0.104643
ENSRNOG00000000814	Fabp7	ensembl	2452.26	1948.74	0.806826	0.104695
ENSRNOG00000019674	Tmem180	ensembl	107.169	148.596	1.39733	0.104716
ENSRNOG00000053083	U4	ensembl	1.02843	4.79754	4.09132	0.104733
ENSRNOG00000012156	Ostf1	ensembl	487.174	377.92	0.78606	0.104799
ENSRNOG00000010363	Mrps23	ensembl	268.557	203.458	0.77094	0.104893
ENSRNOG00000020339	Neurl1	ensembl_havana	305.393	427.919	1.41721	0.104919
ENSRNOG00000011984	Cxcl14	ensembl	502.504	616.762	1.24201	0.104931
ENSRNOG00000029535	Nrbp2	ensembl	1435.43	1744.02	1.22853	0.105045
ENSRNOG00000004972	Upp1	ensembl	63.3332	87.6825	1.4061	0.105201
ENSRNOG00000004572	Zfp472	ensembl	182.951	138.371	0.768865	0.105293
ENSRNOG00000040406	Mir496	ensembl	10.1372	17.3323	1.70738	0.105308
ENSRNOG00000051596	AABR07056131.1	ensembl	3.59553	8.59667	2.34344	0.105336
ENSRNOG00000040350	Mir675	ensembl	3.68105	0.657572	0.196675	0.105364
ENSRNOG00000024239	Fam89b	ensembl	225.667	294.849	1.31984	0.105428
ENSRNOG00000007699	Golga5	ensembl	1760.08	1429.41	0.823548	0.105479
ENSRNOG00000008934	Tmem65	ensembl	478.548	377.393	0.79916	0.105526
ENSRNOG00000016790	Suv420h1	ensembl	1792.3	1467.79	0.830564	0.105544
ENSRNOG00000006209	Mbd6	ensembl	89.2561	129.155	1.4574	0.105663
ENSRNOG00000017017	Zbtb43	ensembl	355.647	278.837	0.796282	0.105762
ENSRNOG00000022488	Izumo3	ensembl	0	2.19757	18.8674	0.105778
ENSRNOG00000052407	Btk	ensembl	30.7169	47.696	1.56268	0.105837
ENSRNOG00000018878	Ssh3	ensembl	317.788	401.636	1.27608	0.10596
ENSRNOG00000006950	Padi3	ensembl	0.769751	3.47399	4.15509	0.105966
ENSRNOG00000011146	Gyg1	ensembl	977.767	1174.98	1.21749	0.106041
ENSRNOG00000010735	Nfyc	ensembl	712.458	872.043	1.24052	0.10614
ENSRNOG00000004864	Prpf40a	ensembl	2257.37	1772.46	0.795634	0.106191
ENSRNOG00000024838	LOC100359679	ensembl	6.51631	1.35386	0.219256	0.106214
ENSRNOG00000046764	Tmprss11a	ensembl	0.786355	4.26454	5.03634	0.10627
ENSRNOG00000025295	Mavs	ensembl	273.499	342.274	1.26552	0.106273
ENSRNOG00000029061	Hirip3	ensembl	1032.8	826.013	0.811726	0.106301
ENSRNOG00000033603	RGD1563835	ensembl	747.25	603.58	0.8191	0.106318
ENSRNOG00000018391	Cdk2ap2	ensembl	140.526	105.677	0.761926	0.106323
ENSRNOG00000006939	Ndufa7	ensembl	160.65	220.327	1.38689	0.106325
ENSRNOG00000011379	Ccndbp1	ensembl	1136.64	920.324	0.821244	0.106363
ENSRNOG00000060235	AABR07044837.2	ensembl	1.83139	6.27453	3.33345	0.106387
ENSRNOG00000011498	Psip1	ensembl	5927.12	4831.78	0.826873	0.106391
ENSRNOG00000021203	Atl3	ensembl	677.303	541.192	0.810258	0.106436
ENSRNOG00000008594	RGD1564345	ensembl	51.4337	33.775	0.671502	0.106544
ENSRNOG00000056883	U7	ensembl	2.38279	6.42941	2.5211	0.106545
ENSRNOG00000010189	Rps24	ensembl	405.059	296.363	0.743811	0.106582
ENSRNOG00000005195	Cst3	ensembl	10723.3	13225.7	1.24823	0.106609
ENSRNOG00000029678	Zfp354b	ensembl	147.332	108.094	0.746301	0.106647
ENSRNOG00000059599	AABR07014323.1	ensembl	2.33214	0	0.0488528	0.106695
ENSRNOG00000032446	Recql4	ensembl	19.5259	30.353	1.55289	0.106721
ENSRNOG00000007998	Ssb	ensembl	1810.35	1437.53	0.806272	0.106743
ENSRNOG00000013147	Cacna1d	ensembl	571.314	691.56	1.22829	0.106757
ENSRNOG00000015303	Fbll1	ensembl	263.37	333.388	1.27946	0.106786
ENSRNOG00000014008	Mfsd2a	ensembl	441.68	573.91	1.3107	0.106854
ENSRNOG00000042160	Tmem167b	ensembl	162.03	208.774	1.30649	0.106857
ENSRNOG00000036502	AABR07065049.1	ensembl	0.376573	2.55888	5.65299	0.106892
ENSRNOG00000060994	Tctn3	ensembl	56.2677	82.6418	1.47525	0.106924
ENSRNOG00000010119	Zmat3	ensembl	178.198	240.321	1.36238	0.106951
ENSRNOG00000004787	AABR07053185.1	ensembl	111.967	159.737	1.43612	0.107025
ENSRNOG00000000314	Sec63	ensembl	1646.28	1321.32	0.814701	0.107033
ENSRNOG00000020667	Shisa5	ensembl	404.451	528.485	1.3178	0.107099
ENSRNOG00000000777	RT1-S3	ensembl_havana	148.294	197.611	1.34203	0.107118
ENSRNOG00000060475	AABR07001555.1	ensembl	15.3973	25.3379	1.63763	0.107121
ENSRNOG00000018417	Naa35	ensembl	493.91	389.78	0.801418	0.107141
ENSRNOG00000017817	Cox4i1	ensembl	9040.54	7380.01	0.827871	0.107184
ENSRNOG00000023561	LOC100361584	ensembl	116.511	66.4368	0.577924	0.107185
ENSRNOG00000008596	Ttll9	ensembl	45.126	64.8531	1.4406	0.107195
ENSRNOG00000014785	Ykt6	ensembl	927.397	1131.82	1.23402	0.107205
ENSRNOG00000027761	Htatsf1	ensembl	1775.03	1396.81	0.798911	0.107224
ENSRNOG00000022567	Gpr62	ensembl	60.7305	83.2981	1.38297	0.107294
ENSRNOG00000009256	Gkn2	ensembl	3.51168	0.757857	0.266444	0.107296
ENSRNOG00000019207	Shank1	ensembl_havana	796.882	1067.9	1.3567	0.107391
ENSRNOG00000000975	Mcoln1	ensembl	940.52	1190.7	1.27963	0.10741
ENSRNOG00000042753	Fgf13	ensembl	1772.77	2142.17	1.22635	0.107434
ENSRNOG00000027972	Rn60_X_0773.3	havana	415.888	326.375	0.796144	0.107457
ENSRNOG00000051570	Gm4944	ensembl	232.066	172.179	0.751499	0.107501
ENSRNOG00000000166	Apex2	ensembl	59.1818	82.8719	1.41611	0.107504
ENSRNOG00000057827	AC109100.2	ensembl	12.9971	6.22995	0.491283	0.107506
[truncated: 20,029 more rows]
